# Supplementary material for: A computational study on the identity of the active catalyst structure for Ru(ii) carboxylate assisted C–H activation in acetonitrile
Source: Royal Society of Chemistry journal article supplement (doi:10.1039/c9ob01092k), 2019-01-01
Supplement: c9ob01092k1.pdf [file c9ob01092k1.pdf]

## A Computational Study on the Identity of the Active Catalyst Structure for Ru(II) Carboxylate Assisted C—H Activation in Acetonitrile

Claire L. McMullin, Nasir A. Rajabi and James S. Hammerton

### Contents

|                                                   | <b>Pages</b>            |
|---------------------------------------------------|-------------------------|
| Breakdown of Energy Contributions                 | <a href="#">2-5</a>     |
| Cratic Correction                                 | <a href="#">6-9</a>     |
| Functional Testing                                | <a href="#">10-13</a>   |
| Additional Figures                                | <a href="#">14</a>      |
| XYZ Coordinates and Computed Energies             |                         |
| Generic Molecules                                 | <a href="#">15</a>      |
| Ru(II) Carboxylate Structures                     |                         |
| Figures 2 & 3                                     | <a href="#">16-20</a>   |
| Figure 4                                          | <a href="#">21-24</a>   |
| Figure 5                                          | <a href="#">25-27</a>   |
| Figure 6                                          | <a href="#">28-36</a>   |
| Figure 7                                          | <a href="#">37-40</a>   |
| Figure 8                                          | <a href="#">41-47</a>   |
| Figures 9 & 10                                    | <a href="#">48-52</a>   |
| Ion-Pair Isomers                                  | <a href="#">53-56</a>   |
| Free Energies at 393 K                            | <a href="#">57-61</a>   |
| B3LYP Optimised Geometries and Energies           | <a href="#">62-89</a>   |
| PBE1PBE Optimised Geometries and Energies         | <a href="#">90-117</a>  |
| $\omega$ B97X-D Optimised Geometries and Energies | <a href="#">118-141</a> |

The following tables detail the evolution of the relative energies as the successive corrections to the initial SCF energy are included. Terms used are:

|                          |                                                                                                                        |
|--------------------------|------------------------------------------------------------------------------------------------------------------------|
| $\Delta E_{BS1}$         | SCF energy computed with the BP86 functional and BS1                                                                   |
| $\Delta H_{BS1}$         | Enthalpy at 0 K with BS1                                                                                               |
| $\Delta G_{BS1}$         | Free energy at 298 K and 1 atm with BS1                                                                                |
| $\Delta G_{BS1/MeCN}$    | Free energy corrected for acetonitrile solvent with BS1                                                                |
| $\Delta G_{BS1/MeCN+D3}$ | Free energy corrected for acetonitrile and dispersion effects with BS1                                                 |
| $\Delta E_{BS2}$         | Single point SCF energy computed with the BP86 functional and BS2                                                      |
| $\Delta G_{393}$         | Free energy at 393.15 K and 1 atm with BS1                                                                             |
| $\Delta G_{393+CC}$      | Free energy at 393.15 K and 1 M with BS1 (cratic correction applied)                                                   |
| $\Delta G_{MeCN}$        | Free energy corrected for basis set (BS2), dispersion effects, temperature, cratic and acetonitrile solvent            |
| $\Delta G_{tol}$         | Free energy corrected for basis set (BS2), dispersion effects, temperature, cratic and toluene solvent                 |
| $\Delta G_{MeCN-298}$    | Free energy corrected for basis set (BS2), dispersion effects and acetonitrile solvent at 292 K (no cratic correction) |

In each case the final data used in the main article is highlighted in bold.

**Table S1** – Relative energies (in kcal mol<sup>-1</sup>) for computed structures. Data in bold are those used in the main text. All energies are quoted relative to **A** at 0.0 kcal/mol. \* single point at 393.15 K has negative frequency.

|                                                                       | $\Delta E_{BS1}$ | $\Delta H_{BS1}$ | $\Delta G_{BS1}$ | $\Delta G_{BS1/MeCN}$ | $\Delta G_{BS1/MeCN+D3}$ | $\Delta E_{BS2}$ | $\Delta G_{393}$ | $\Delta G_{393+CC}$ | $\Delta G_{MeCN}$ | $\Delta G_{tol}$ |
|-----------------------------------------------------------------------|------------------|------------------|------------------|-----------------------|--------------------------|------------------|------------------|---------------------|-------------------|------------------|
| Temperature [K]                                                       | 0                | 298              | 298              | 298                   | 298                      | 0                | 393.15           | 393.15              | 393.15            | 393.15           |
| Phase                                                                 | [1 atm]          | [1 atm]          | [1 atm]          | [1 atm]               | [1 atm]                  | [1 atm]          | [1 atm]          | [1 M]               | [1 M]             | [1 M]            |
| <b>A</b>                                                              | 0.0              | 0.0              | 0.0              | 0.0                   | 0.0                      | 0.0              | 0.0              | 0.0                 | <b>0.0</b>        | 0.0              |
| [(C <sub>6</sub> H <sub>6</sub> )Ru(O <sup>t</sup> Bu) <sub>2</sub> ] | 13.9             | 14.5             | 11.7             | 9.4                   | -2.1                     | 6.3              | 10.2             | 10.2                | <b>-11.1</b>      | -7.4             |
| [(C <sub>6</sub> H <sub>6</sub> )Ru(O <sup>t</sup> Bu)] <sup>+</sup>  | 150.5            | 147.8            | 136.1            | 144.7                 | 48.5                     | 136.1            | 132.6            | 135.3               | <b>33.3</b>       | 73.7             |
| [(C <sub>6</sub> H <sub>6</sub> )Ru(OMes) <sub>2</sub> ]              | 26.4             | 26.2             | 25.6             | 21.0                  | 3.2                      | 15.9             | 25.2             | 25.2                | <b>-7.8</b>       | -2.5             |
| [(C <sub>6</sub> H <sub>6</sub> )Ru(OMes)] <sup>+</sup>               | 136.3            | 134.5            | 121.8            | 132.4                 | 47.2                     | 124.0            | 117.9            | 120.7               | <b>33.8</b>       | 69.5             |

|                                                       |       |       |       |       |       |       |       |       |              |       |
|-------------------------------------------------------|-------|-------|-------|-------|-------|-------|-------|-------|--------------|-------|
| [(toluene)Ru(OAc) <sub>2</sub> ]                      | -1.6  | -1.5  | -0.1  | -1.1  | -1.4  | -1.8  | 0.4   | 0.4   | <b>-1.2</b>  | -0.9  |
| [( <i>o</i> -xylene)Ru(OAc) <sub>2</sub> ]            | -1.3  | -1.5  | -2.0  | -3.9  | -4.2  | -1.6  | -2.2  | -2.2  | <b>-4.8</b>  | -4.6  |
| [( <i>p</i> -cymene)Ru(OAc) <sub>2</sub> ]            | -3.4  | -3.3  | -1.4  | -4.3  | -3.9  | -3.5  | -0.8  | -0.8  | <b>-3.5</b>  | -3.6  |
| [(Bn*)Ru(OAc) <sub>2</sub> ]                          | -5.9  | -5.6  | -2.4  | -9.1  | -10.0 | -6.2  | -1.3  | -1.3  | <b>-9.2</b>  | -8.5  |
| <b>B<sup>+</sup></b>                                  | 113.5 | 113.1 | 114.3 | 104.5 | 17.2  | 98.7  | 114.6 | 114.6 | <b>2.8</b>   | 37.5  |
| TS( <b>B<sup>+</sup>-C<sup>+</sup></b> )              | 128.2 | 126.9 | 128.6 | 117.8 | 27.9  | 113.2 | 129.1 | 129.1 | <b>13.4</b>  | 49.6  |
| <b>C<sup>+</sup></b>                                  | 112.8 | 112.1 | 113.2 | 102.5 | 15.2  | 99.1  | 113.4 | 113.4 | <b>1.7</b>   | 36.5  |
| <b>B</b> ·OAc                                         | 14.8  | 15.2  | 28.3  | 9.7   | 8.1   | 14.4  | 32.2  | 29.5  | <b>8.9</b>   | 9.7   |
| TS( <b>B-C</b> )1·OAc                                 | 28.0  | 27.1  | 39.4  | 17.9  | 18.0  | 26.6  | 43.1  | 40.4  | <b>17.6</b>  | 19.0  |
| INT( <b>B-C</b> )·OAc                                 | 24.0  | 22.6  | 35.1  | 18.0  | 13.6  | 23.8  | 38.8  | 36.1  | <b>14.4</b>  | 16.7  |
| TS( <b>B-C</b> )2·OAc                                 | 24.2  | 21.6  | 35.0  | 17.6  | 13.8  | 24.5  | 39.1  | 36.4  | <b>15.6</b>  | 17.5  |
| <b>C</b> ·OAc                                         | 15.6  | 15.5  | 28.2  | 11.1  | 7.5   | 15.8  | 32.0  | 29.3  | <b>8.8</b>   | 10.6  |
| <b>A</b> ·a-H                                         | -3.7  | -3.1  | 7.2   | -1.1  | 1.8   | -2.1  | 10.1  | 7.4   | <b>3.6</b>   | 2.1   |
| <b>B</b>                                              | 0.6   | 1.5   | 15.2  | -2.8  | -1.9  | 0.8   | 19.4  | 19.4  | <b>-0.2</b>  | -0.5  |
| TS( <b>B-C</b> )                                      | 30.6  | 29.7  | 43.6  | 25.5  | 20.3  | 30.3  | 47.9  | 47.9  | <b>21.6</b>  | 24.6  |
| <b>C</b>                                              | -13.4 | -12.7 | 0.7   | -30.6 | -13.2 | -11.6 | 4.7   | 4.7   | <b>-10.0</b> | -11.7 |
| <b>B'</b>                                             | -2.0  | -2.2  | -0.1  | -4.1  | -3.6  | 1.8   | 0.6   | 0.6   | <b>0.8</b>   | 0.8   |
| TS( <b>B'-C'</b> )                                    | 19.9  | 18.8  | 20.1  | 16.8  | 14.6  | 22.3  | 20.6  | 20.6  | <b>17.6</b>  | 18.9  |
| <b>C'</b>                                             | 22.2  | 21.6  | 20.7  | 17.9  | 14.9  | 24.3  | 20.2  | 20.2  | <b>16.5</b>  | 18.8  |
| <b>C'</b> (without HOAc)                              | 31.9  | 30.4  | 18.9  | 20.8  | 15.3  | 31.0  | 15.2  | 17.9  | <b>13.4</b>  | 16.9  |
| <b>D</b>                                              | -15.5 | -15.8 | -0.3  | -25.0 | -23.4 | -11.2 | 4.5   | 7.8   | <b>-17.0</b> | -17.6 |
| TS( <b>D-E</b> )                                      | 6.3   | 3.5   | 18.9  | -6.0  | -3.1  | 10.7  | 23.6  | 20.9  | <b>3.2</b>   | 1.9   |
| <b>E</b>                                              | -9.0  | -8.3  | 6.1   | -33.3 | -13.0 | -5.3  | 10.4  | 7.7   | <b>-7.7</b>  | -10.4 |
| <b>E</b> (without HOAc)                               | -11.0 | -11.2 | -7.9  | -25.0 | -21.2 | -9.8  | -7.0  | -7.0  | <b>-19.0</b> | -19.2 |
| <b>D<sup>+</sup></b> ( $\eta^6$ )                     | 110.3 | 109.8 | 110.6 | 97.8  | 14.0  | 96.0  | 110.7 | 110.7 | <b>-0.2</b>  | 31.4  |
| TS( <b>D<sup>+</sup>-E<sup>+</sup></b> ) ( $\eta^6$ ) | 124.5 | 123.1 | 125.1 | 110.8 | 25.0  | 109.9 | 125.7 | 125.7 | <b>11.0</b>  | 45.4  |
| <b>E<sup>+</sup></b> ( $\eta^6$ )                     | 108.8 | 108.1 | 110.1 | 96.5  | 13.1  | 95.6  | 110.6 | 110.6 | <b>0.4</b>   | 33.4  |
| <b>D<sup>+</sup></b> ( $\kappa^2$ )                   | 114.4 | 113.3 | 116.4 | 99.3  | 15.4  | 102.6 | 117.2 | 117.2 | <b>4.5</b>   | 37.8  |

## Breakdown of Energy Contributions

|                                                                                                           |       |       |       |       |       |       |        |        |               |       |
|-----------------------------------------------------------------------------------------------------------|-------|-------|-------|-------|-------|-------|--------|--------|---------------|-------|
| TS(D <sup>+</sup> -E <sup>+</sup> ) (κ <sup>2</sup> )                                                     | 131.0 | 126.8 | 129.7 | 114.9 | 30.2  | 119.8 | 130.5  | 130.5  | <b>19.9</b>   | 52.8  |
| E <sup>+</sup> (κ <sup>2</sup> )                                                                          | 121.8 | 120.9 | 122.8 | 104.0 | 16.9  | 110.2 | 123.1  | 123.1  | <b>5.6</b>    | 41.9  |
| D <sup>+</sup> (κ <sup>1</sup> )                                                                          | 127.0 | 124.8 | 127.3 | 113.7 | 25.4  | 114.0 | 127.9  | 127.9  | <b>13.1</b>   | 49.1  |
| TS(D <sup>+</sup> -E <sup>+</sup> ) (κ <sup>1</sup> )                                                     | 129.9 | 125.4 | 128.7 | 116.0 | 27.8  | 118.1 | 129.7  | 129.7  | <b>17.0</b>   | 52.3  |
| E <sup>+</sup> (κ <sup>1</sup> )                                                                          | 127.3 | 125.4 | 128.2 | 114.8 | 28.6  | 115.9 | 128.9  | 128.9  | <b>17.9</b>   | 52.6  |
| <sup>3</sup> D <sup>+</sup>                                                                               | 65.8  | 69.0  | 110.9 | 60.5  | -10.6 | 55.3  | 113.3  | 105.2  | <b>-16.9</b>  | 10.7  |
| INT( <sup>3</sup> D <sup>+</sup> )                                                                        | 79.3  | 82.2  | 115.0 | 74.7  | 4.2   | 70.1  | 127.5  | 119.4  | <b>-0.6</b>   | 26.4  |
| TS( <sup>3</sup> D <sup>+</sup> - <sup>3</sup> E <sup>+</sup> )                                           | 90.1  | 89.7  | 123.3 | 49.5  | 13.4  | 82.1  | 136.2  | 128.1  | <b>10.2</b>   | 36.8  |
| <sup>3</sup> E <sup>+</sup>                                                                               | 84.4  | 86.8  | 119.0 | 79.1  | 10.0  | 76.2  | 131.3  | 123.2  | <b>6.0</b>    | 32.5  |
| <sup>1</sup> A                                                                                            | -9.9  | -8.9  | 1.1   | -5.8  | -2.5  | -4.3  | 5.0    | 2.3    | <b>4.4</b>    | 2.8   |
| <sup>1</sup> A <sup>+</sup>                                                                               | 118.9 | 118.2 | 114.9 | 115.7 | 24.8  | 103.0 | 114.6  | 114.6  | <b>8.7</b>    | 45.0  |
| <sup>6</sup> F <sup>2+</sup>                                                                              | 215.6 | 217.6 | 234.0 | 224.4 | 13.5  | 186.2 | 247.4* | 239.3* | <b>-10.6*</b> | 72.6* |
| <sup>3</sup> A <sup>2+</sup>                                                                              | 297.8 | 297.2 | 300.8 | 296.6 | 56.7  | 264.3 | 304.2  | 301.5  | <b>23.9</b>   | 119.9 |
| <sup>5</sup> F <sup>+</sup> (κ <sup>1</sup> )                                                             | 54.4  | 57.1  | 79.8  | 68.7  | -4.0  | 41.3  | 90.7   | 82.6   | <b>-14.2</b>  | 14.0  |
| <sup>4</sup> F <sup>+</sup> (κ <sup>2</sup> )                                                             | 62.4  | 64.3  | 77.6  | 73.0  | -2.5  | 50.2  | 85.0   | 79.6   | <b>-12.7</b>  | 16.6  |
| c- <sup>4</sup> F (2κ <sup>1</sup> )                                                                      | -39.3 | -36.3 | -9.6  | -22.1 | -6.0  | -18.5 | 1.8    | -6.3   | <b>-13.7</b>  | -15.0 |
| t- <sup>4</sup> F (2κ <sup>1</sup> )                                                                      | -38.5 | -35.5 | -9.6  | -21.8 | -6.1  | -18.2 | 1.5    | -6.6   | <b>-13.5</b>  | -14.9 |
| f- <sup>3</sup> F (κ <sup>2</sup> κ <sup>1</sup> )                                                        | -34.6 | -32.3 | -15.2 | -21.2 | -18.0 | -31.6 | -7.5   | -12.9  | <b>-12.7</b>  | -13.9 |
| m- <sup>3</sup> F (κ <sup>2</sup> κ <sup>1</sup> )                                                        | -30.0 | -28.0 | -13.4 | -35.5 | -17.7 | -26.8 | -6.7   | -12.1  | <b>-13.2</b>  | -13.2 |
| c- <sup>2</sup> F (2κ <sup>2</sup> )                                                                      | -25.1 | -23.8 | -16.8 | -16.5 | -13.6 | -20.4 | -13.0  | -15.7  | <b>-7.8</b>   | -9.0  |
| t- <sup>2</sup> F (2κ <sup>2</sup> )                                                                      | -23.2 | -22.0 | -17.7 | -17.6 | -16.6 | -18.6 | -10.8* | -13.5* | <b>-7.9*</b>  | -8.0* |
| <sup>1</sup> B <sup>+</sup> (t-N, t-O)                                                                    | 110.1 | 110.4 | 121.4 | 101.4 | 20.4  | 99.8  | 125.5  | 122.8  | <b>11.5</b>   | 43.3  |
| TS( <sup>1</sup> B <sup>+</sup> - <sup>1</sup> C <sup>+</sup> ) (t-N, t-O)                                | 127.1 | 126.1 | 137.5 | 119.9 | 37.1  | 115.7 | 141.8  | 139.1  | <b>27.3</b>   | 60.0  |
| <sup>1</sup> C <sup>+</sup> (t-N, t-O)                                                                    | 103.8 | 103.9 | 115.0 | 95.0  | 12.1  | 93.1  | 119.1  | 116.4  | <b>2.8</b>    | 35.9  |
| <sup>1</sup> B <sup>+</sup> (t-C <sub>6</sub> H <sub>6</sub> , t-O)                                       | 109.8 | 110.1 | 120.8 | 102.0 | 20.4  | 99.4  | 124.9  | 122.2  | <b>11.4</b>   | 43.5  |
| TS( <sup>1</sup> B <sup>+</sup> - <sup>1</sup> C <sup>+</sup> )1 (t-C <sub>6</sub> H <sub>6</sub> , t-O)  | 128.9 | 128.5 | 139.3 | 122.4 | 38.0  | 117.8 | 143.4  | 140.7  | <b>28.3</b>   | 62.2  |
| INT ( <sup>1</sup> B <sup>+</sup> - <sup>1</sup> C <sup>+</sup> ) (t-C <sub>6</sub> H <sub>6</sub> , t-O) | 130.6 | 128.8 | 139.1 | 119.9 | 32.5  | 119.1 | 143.0  | 140.3  | <b>22.1</b>   | 57.9  |
| TS( <sup>1</sup> B <sup>+</sup> - <sup>1</sup> C <sup>+</sup> )2 (t-C <sub>6</sub> H <sub>6</sub> , t-O)  | 130.7 | 127.7 | 138.8 | 119.3 | 32.8  | 119.6 | 143.0  | 140.3  | <b>23.1</b>   | 58.4  |

## Breakdown of Energy Contributions

|                                                                                         |       |       |       |       |       |       |       |       |              |       |
|-----------------------------------------------------------------------------------------|-------|-------|-------|-------|-------|-------|-------|-------|--------------|-------|
| $^1\mathbf{C}^+$ ( $t\text{-C}_6\text{H}_6, t\text{-O}$ )                               | 119.9 | 119.4 | 129.5 | 110.0 | 25.8  | 109.2 | 133.2 | 130.5 | <b>16.0</b>  | 50.1  |
| $^1\mathbf{B}^+$ ( $t\text{-O}, t\text{-N}$ )                                           | 108.9 | 109.1 | 120.8 | 102.9 | 20.9  | 98.4  | 125.1 | 122.4 | <b>12.0</b>  | 44.4  |
| TS( $^1\mathbf{B}^+ \text{-} ^1\mathbf{C}^+$ ) ( $t\text{-O}, t\text{-N}$ )             | 131.1 | 127.7 | 139.9 | 120.9 | 39.6  | 121.4 | 144.4 | 141.7 | <b>31.8</b>  | 63.8  |
| $^1\mathbf{C}^+$ ( $t\text{-O}, t\text{-N}$ )                                           | 125.7 | 125.5 | 136.2 | 118.3 | 32.8  | 115.6 | 140.2 | 137.5 | <b>23.9</b>  | 58.8  |
| $^1\mathbf{B}^+$ ( $t\text{-O}, t\text{-C}_6\text{H}_6$ )                               | 114.9 | 114.8 | 126.1 | 108.3 | 25.8  | 104.5 | 130.3 | 127.6 | <b>16.9</b>  | 49.6  |
| TS( $^1\mathbf{B}^+ \text{-} ^1\mathbf{C}^+$ ) ( $t\text{-O}, t\text{-C}_6\text{H}_6$ ) | 129.8 | 126.4 | 137.9 | 120.2 | 39.0  | 119.9 | 142.3 | 139.6 | <b>30.7</b>  | 62.6  |
| $^1\mathbf{C}^+$ ( $t\text{-O}, t\text{-C}_6\text{H}_6$ )                               | 107.9 | 108.0 | 118.6 | 100.9 | 17.8  | 97.4  | 122.5 | 119.8 | <b>8.6</b>   | 41.8  |
| $^1\mathbf{B}^+$ ( $t\text{-O}, t\text{-O}$ )                                           | 112.4 | 112.4 | 122.6 | 105.2 | 23.7  | 101.4 | 126.5 | 123.8 | <b>13.8</b>  | 45.9  |
| $^4\mathbf{G}^+$ ( $\kappa^1$ )                                                         | 59.6  | 62.6  | 89.9  | 65.9  | -7.1  | 48.3  | 101.6 | 93.5  | <b>-14.9</b> | 13.6  |
| $^3\mathbf{G}$ ( $2\kappa^1$ )                                                          | -35.5 | -32.1 | -1.1  | -26.3 | -20.7 | -32.4 | 10.9  | 2.8   | <b>-14.0</b> | -16.2 |
| $^3\mathbf{G}^+$ ( $\kappa^2$ )                                                         | 75.3  | 76.6  | 94.6  | 78.5  | 1.3   | 63.3  | 102.5 | 97.1  | <b>-8.3</b>  | 22.1  |
| $^2\mathbf{G}^+$ ( $\kappa^2$ )                                                         | 84.4  | 84.8  | 92.7  | 84.1  | 4.8   | 72.0  | 96.7  | 94.0  | <b>-6.3</b>  | 24.8  |
| $^1\mathbf{G}$ ( $2\kappa^2$ )                                                          | -21.5 | -20.3 | -11.1 | -19.4 | -17.0 | -16.6 | -7.0  | -9.7  | <b>-10.7</b> | -11.3 |
| $^2\mathbf{G}$ ( $\kappa^2\kappa^1$ )                                                   | -29.7 | -28.8 | -7.9  | -25.1 | -22.0 | -27.4 | 0.2   | -5.3  | <b>-17.1</b> | -18.2 |
| TS( $^2\mathbf{G} \text{-} ^2\mathbf{H}$ )                                              | -27.9 | -29.1 | -7.4  | -25.1 | -20.4 | -24.7 | 1.0   | -4.4  | <b>-14.2</b> | -16.2 |
| $^2\mathbf{H}$                                                                          | -33.2 | -31.6 | -10.8 | -50.7 | -23.1 | -29.8 | -2.8  | -8.2  | <b>-17.1</b> | -19.4 |
| $^1\mathbf{G}$ ( $\kappa^2\kappa^1$ )                                                   | -21.0 | -21.2 | -10.0 | -20.1 | -18.7 | -17.2 | -5.7  | -8.5  | <b>-13.4</b> | -13.9 |
| TS( $^1\mathbf{G} \text{-} ^1\mathbf{H}$ )                                              | -19.9 | -22.1 | -10.5 | -20.9 | -18.2 | -15.4 | -6.0  | -8.7  | <b>-11.8</b> | -13.0 |
| $^1\mathbf{H}$                                                                          | -27.1 | -26.4 | -16.5 | -26.6 | -23.0 | -22.2 | -12.6 | -15.3 | <b>-17.1</b> | -18.8 |

A thermal correction uses the ideal gas law to convert from gas-phase [1 atm] to solution-phase [1 M] units. This cratic correction (CC) adjusts the free energy value when above the standard state temperature (298 K), and accounts for an increase in volume when a solution is heated.

$$\text{Molar volume of gas at 1 atm at T: } V = \frac{1000 \times 8.315 \times T}{101300}$$

$$\text{To convert V from 1 atm to 1 dm}^3 \text{ mol}^{-1}: \text{Cratic Correction (CC)} = 1.98 \times \frac{T}{1000} \times \ln(V)$$

From the data in Table S2, comparing the difference ( $\Delta(G_{393}-G_{BS1})$ ; orange) in free energy between 298K ( $\Delta G_{BS1}$ ) and 393.15 K ( $\Delta G_{393}$ ) with the equivalent difference ( $\Delta(G_{393+CC}-G_{BS1})$ ; blue) after the application of the cratic correction ( $\Delta G_{393+CC}$ ) there is a clear compensation when more individual computed species are required to balance the energies relative to complex **A**. Where the number of molecules to balance with **A** are equal (i.e. ratio is 1), there is no difference between the orange and blue values. If the ratio is less than 1,  $\Delta(G_{393+CC}-G_{BS1})$  is negative (**C'** without HOAc). The largest increases in free energy (4 - 5 kcal mol<sup>-1</sup>) with this thermal correction was observed for pathway **B** → **C** and **<sup>3</sup>D** → **<sup>3</sup>E**, both have two acetates at the Ru centre during the C–H activation process. Another factor to consider when analysing these values is the impact of low frequencies, which are involved in computing free energies. For two species, **<sup>6</sup>F**<sup>2+</sup> and **t-2F** (2κ<sup>2</sup>), calculating the single point free energy at 393.15 K made the lowest positive frequency (originally 1.7042 and 2.0102 cm<sup>-1</sup> respectively) now a small negative frequency instead (-4.1196 and -1.9844 cm<sup>-1</sup>), and therefore more prone to thermal correction variation.

**Table S2** – Relative energies (in kcal mol<sup>-1</sup>) for computed structures at 298 and 393.15 K. Data in bold are used in the main text. All energies are quoted relative to **A** at 0.0 kcal/mol. \* single point at 393.15 K has negative frequency.

| Temperature [in K]                                  | $\Delta G_{BS1}$ | $\Delta G_{393}$   | $\Delta(G_{393}-G_{BS1})$ | $\Delta(G_{393+CC}-G_{BS1})$ | $\Delta G_{MeCN-298}$ | $\Delta G_{MeCN}$       |
|-----------------------------------------------------|------------------|--------------------|---------------------------|------------------------------|-----------------------|-------------------------|
|                                                     | 298              | 393.15<br>(120 °C) |                           | + CC                         | 298                   | 393.15 + CC<br>(120 °C) |
| <b>A</b>                                            | 0.0              | 0.0                | -                         | -                            | 0.0                   | <b>0.0</b>              |
| <b>B</b> <sup>+</sup>                               | 114.3            | 114.6              | 0.29                      | 0.29                         | 2.5                   | <b>2.8</b>              |
| TS( <b>B</b> <sup>+</sup> - <b>C</b> <sup>+</sup> ) | 128.6            | 129.1              | 0.54                      | 0.54                         | 12.9                  | <b>13.4</b>             |
| <b>C</b> <sup>+</sup>                               | 113.2            | 113.4              | 0.22                      | 0.22                         | 1.5                   | <b>1.7</b>              |
| <b>B</b> ·OAc                                       | 28.3             | 32.2               | 3.93                      | 1.23                         | 7.7                   | <b>8.9</b>              |
| TS( <b>B</b> - <b>C</b> )1·OAc                      | 39.4             | 43.1               | 3.72                      | 1.01                         | 16.6                  | <b>17.6</b>             |
| INT( <b>B</b> - <b>C</b> )·OAc                      | 35.1             | 38.8               | 3.72                      | 1.02                         | 13.4                  | <b>14.4</b>             |

|                                                                           |       |       |       |       |       |       |
|---------------------------------------------------------------------------|-------|-------|-------|-------|-------|-------|
| TS(B-C)2·OAc                                                              | 35.0  | 39.1  | 4.16  | 1.46  | 14.1  | 15.6  |
| C·OAc                                                                     | 28.2  | 32.0  | 3.80  | 1.09  | 7.7   | 8.8   |
| <b>A·a-H</b>                                                              | 7.2   | 10.1  | 2.96  | 0.25  | 3.4   | 3.6   |
| <b>B</b>                                                                  | 15.2  | 19.4  | 4.16  | 4.16  | -1.6  | -0.2  |
| TS(B-C)                                                                   | 43.6  | 47.9  | 4.33  | 4.33  | 20.0  | 21.6  |
| <b>C</b>                                                                  | 0.7   | 4.7   | 4.03  | 4.03  | -11.4 | -10.0 |
| <b>B'</b>                                                                 | -0.1  | 0.6   | 0.66  | 0.66  | 0.2   | 0.8   |
| TS(B'-C')                                                                 | 20.1  | 20.6  | 0.50  | 0.50  | 17.1  | 17.6  |
| <b>C'</b>                                                                 | 20.7  | 20.2  | -0.49 | -0.49 | 17.0  | 16.5  |
| <b>C'</b> (without HOAc)                                                  | 18.9  | 15.2  | -3.71 | -1.01 | 14.4  | 13.4  |
| <b>D</b>                                                                  | -0.3  | 4.5   | 4.79  | 2.08  | -19.0 | -17.0 |
| TS(D-E)                                                                   | 18.9  | 23.6  | 4.71  | 2.01  | 1.2   | 3.2   |
| <b>E</b>                                                                  | 6.1   | 10.4  | 4.31  | 1.60  | -9.3  | -7.7  |
| <b>E</b> (without HOAc)                                                   | -7.9  | -7.0  | 0.94  | 0.94  | -19.9 | -19.0 |
| <b>D<sup>+</sup></b> ( $\eta^6$ )                                         | 110.6 | 110.7 | 0.09  | 0.09  | -0.3  | -0.2  |
| TS(D <sup>+</sup> -E <sup>+</sup> ) ( $\eta^6$ )                          | 125.1 | 125.7 | 0.61  | 0.61  | 10.4  | 11.0  |
| <b>E<sup>+</sup></b> ( $\eta^6$ )                                         | 110.1 | 110.6 | 0.51  | 0.51  | -0.1  | 0.4   |
| <b>D<sup>+</sup></b> ( $\kappa^2$ )                                       | 116.4 | 117.2 | 0.90  | 0.90  | 3.6   | 4.5   |
| TS(D <sup>+</sup> -E <sup>+</sup> ) ( $\kappa^2$ )                        | 129.7 | 130.5 | 0.83  | 0.83  | 19.0  | 19.9  |
| <b>E<sup>+</sup></b> ( $\kappa^2$ )                                       | 122.8 | 123.1 | 0.36  | 0.36  | 5.3   | 5.6   |
| <b>D<sup>+</sup></b> ( $\kappa^1$ )                                       | 127.3 | 127.9 | 0.65  | 0.65  | 12.4  | 13.1  |
| TS(D <sup>+</sup> -E <sup>+</sup> ) ( $\kappa^1$ )                        | 128.7 | 129.7 | 1.01  | 1.01  | 16.0  | 17.0  |
| <b>E<sup>+</sup></b> ( $\kappa^1$ )                                       | 128.2 | 128.9 | 0.77  | 0.77  | 17.1  | 17.9  |
| <b><sup>3</sup>D<sup>+</sup></b>                                          | 110.9 | 113.3 | 12.38 | 4.27  | -21.2 | -16.9 |
| INT( <b><sup>3</sup>D<sup>+</sup></b> )                                   | 115.0 | 127.5 | 12.51 | 4.40  | -5.0  | -0.6  |
| TS( <b><sup>3</sup>D<sup>+</sup></b> - <b><sup>3</sup>E<sup>+</sup></b> ) | 123.3 | 136.2 | 12.89 | 4.78  | 5.4   | 10.2  |
| <b><sup>3</sup>E<sup>+</sup></b>                                          | 119.0 | 131.3 | 12.28 | 4.17  | 1.8   | 6.0   |
| <b><sup>1</sup>A</b>                                                      | 1.1   | 5.0   | 3.92  | 1.21  | 3.2   | 4.4   |

|                                                                                                                |       |        |       |       |       |              |
|----------------------------------------------------------------------------------------------------------------|-------|--------|-------|-------|-------|--------------|
| <b><sup>1</sup>A<sup>+</sup></b>                                                                               | 20.8  | 114.6  | -0.29 | -0.29 | 9.0   | <b>8.7</b>   |
| <b><sup>6</sup>F<sup>2+</sup></b>                                                                              | 234.0 | 247.4* | 13.4  | 5.31  | -16.0 | <b>-10.6</b> |
| <b><sup>3</sup>A<sup>2+</sup></b>                                                                              | 300.8 | 304.2  | 3.41  | 0.70  | 23.2  | <b>23.9</b>  |
| <b><sup>5</sup>F<sup>+</sup> (κ<sup>1</sup>)</b>                                                               | 79.8  | 90.7   | 10.90 | 2.79  | -17.0 | <b>-14.2</b> |
| <b><sup>4</sup>F<sup>+</sup> (κ<sup>2</sup>)</b>                                                               | 77.6  | 85.0   | 7.40  | 2.00  | -12.0 | <b>-12.7</b> |
| <b>c-4F (2κ<sup>1</sup>)</b>                                                                                   | -9.6  | 1.8    | 11.41 | 3.30  | -17.0 | <b>-13.7</b> |
| <b>t-4F (2κ<sup>1</sup>)</b>                                                                                   | -9.6  | 1.5    | 11.15 | 3.04  | -16.5 | <b>-13.5</b> |
| <b>f-3F (κ<sup>2</sup>κ<sup>1</sup>)</b>                                                                       | -15.2 | -7.5   | 7.70  | 2.30  | -15.0 | <b>-12.7</b> |
| <b>m-3F (κ<sup>2</sup>κ<sup>1</sup>)</b>                                                                       | -13.4 | -6.7   | 6.68  | 1.27  | -14.5 | <b>-13.2</b> |
| <b>c-2F (2κ<sup>2</sup>)</b>                                                                                   | -16.8 | -13.0  | 3.8   | 1.09  | -8.9  | <b>-7.8</b>  |
| <b>t-2F (2κ<sup>2</sup>)</b>                                                                                   | -17.7 | -10.8* | 6.85  | 4.14  | -12.0 | <b>-7.9</b>  |
| <b><sup>1</sup>B<sup>+</sup> (t-N, t-O)</b>                                                                    | 121.4 | 125.5  | 4.09  | 1.39  | 10.1  | <b>11.5</b>  |
| <b>TS(<sup>1</sup>B<sup>+</sup>-<sup>1</sup>C<sup>+</sup>) (t-N, t-O)</b>                                      | 137.5 | 141.8  | 4.32  | 1.62  | 25.6  | <b>27.3</b>  |
| <b><sup>1</sup>C<sup>+</sup> (t-N, t-O)</b>                                                                    | 115.0 | 119.1  | 4.11  | 1.41  | 1.4   | <b>2.8</b>   |
| <b><sup>1</sup>B<sup>+</sup> (t-C<sub>6</sub>H<sub>6</sub>, t-O)</b>                                           | 120.8 | 124.9  | 4.00  | 1.29  | 10.1  | <b>11.4</b>  |
| <b>TS(<sup>1</sup>B<sup>+</sup>-<sup>1</sup>C<sup>+</sup>)<sub>1</sub> (t-C<sub>6</sub>H<sub>6</sub>, t-O)</b> | 139.3 | 143.4  | 4.10  | 1.40  | 26.9  | <b>28.3</b>  |
| <b>INT (<sup>1</sup>B<sup>+</sup>-<sup>1</sup>C<sup>+</sup>) (t-C<sub>6</sub>H<sub>6</sub>, t-O)</b>           | 139.1 | 143.0  | 3.82  | 1.12  | 21.0  | <b>22.1</b>  |
| <b>TS(<sup>1</sup>B<sup>+</sup>-<sup>1</sup>C<sup>+</sup>)<sub>2</sub> (t-C<sub>6</sub>H<sub>6</sub>, t-O)</b> | 138.8 | 143.0  | 4.16  | 1.45  | 21.7  | <b>23.1</b>  |
| <b><sup>1</sup>C<sup>+</sup> (t-C<sub>6</sub>H<sub>6</sub>, t-O)</b>                                           | 129.5 | 133.2  | 3.73  | 1.03  | 15.0  | <b>16.0</b>  |
| <b><sup>1</sup>B<sup>+</sup> (t-O, t-N)</b>                                                                    | 120.8 | 125.1  | 4.35  | 1.65  | 10.4  | <b>12.0</b>  |
| <b>TS(<sup>1</sup>B<sup>+</sup>-<sup>1</sup>C<sup>+</sup>) (t-O, t-N)</b>                                      | 139.9 | 144.4  | 4.57  | 1.87  | 29.9  | <b>31.8</b>  |
| <b><sup>1</sup>C<sup>+</sup> (t-O, t-N)</b>                                                                    | 136.2 | 140.2  | 3.97  | 1.27  | 22.6  | <b>23.9</b>  |
| <b><sup>1</sup>B<sup>+</sup> (t-O, t-C<sub>6</sub>H<sub>6</sub>)</b>                                           | 126.1 | 130.3  | 4.21  | 1.50  | 15.4  | <b>16.9</b>  |
| <b>TS(<sup>1</sup>B<sup>+</sup>-<sup>1</sup>C<sup>+</sup>) (t-O, t-C<sub>6</sub>H<sub>6</sub>)</b>             | 137.9 | 142.3  | 4.32  | 1.61  | 29.1  | <b>30.7</b>  |
| <b><sup>1</sup>C<sup>+</sup> (t-O, t-C<sub>6</sub>H<sub>6</sub>)</b>                                           | 118.6 | 122.5  | 3.91  | 1.20  | 7.4   | <b>8.6</b>   |
| <b><sup>1</sup>B<sup>+</sup> (t-O, t-O)</b>                                                                    | 122.6 | 126.5  | 3.82  | 1.11  | 12.7  | <b>13.8</b>  |
| <b><sup>4</sup>G<sup>+</sup> (κ<sup>1</sup>)</b>                                                               | 89.9  | 101.6  | 11.68 | 3.57  | -18.5 | <b>-14.9</b> |
| <b><sup>3</sup>G (2κ<sup>1</sup>)</b>                                                                          | -1.1  | 10.9   | 11.96 | 3.85  | -17.8 | <b>-14.0</b> |



|                                           |       |       |      |      |       |       |
|-------------------------------------------|-------|-------|------|------|-------|-------|
| $^3\mathbf{G}^+$ ( $\text{K}^2$ )         | 94.6  | 102.5 | 7.93 | 2.52 | -10.8 | -8.3  |
| $^2\mathbf{G}^+$ ( $\text{K}^2$ )         | 92.7  | 96.7  | 4.06 | 1.35 | -7.6  | -6.3  |
| $^1\mathbf{G}$ ( $2\text{K}^2$ )          | -11.1 | -7.0  | 4.09 | 1.38 | -12.0 | -10.7 |
| $^2\mathbf{G}$ ( $\text{K}^2\text{K}^1$ ) | -7.9  | 0.2   | 8.05 | 2.65 | -19.7 | -17.1 |
| TS( $^2\mathbf{G}$ - $^2\mathbf{H}$ )     | -7.4  | 1.0   | 8.42 | 3.01 | -17.2 | -14.2 |
| $^2\mathbf{H}$                            | -10.8 | -2.8  | 8.01 | 2.60 | -19.8 | -17.1 |
| $^1\mathbf{G}$ ( $\text{K}^2\text{K}^1$ ) | -10.0 | -5.7  | 4.27 | 1.56 | -15.0 | -13.4 |
| TS( $^1\mathbf{G}$ - $^1\mathbf{H}$ )     | -10.5 | -6.0  | 4.51 | 1.81 | -13.6 | -11.8 |
| $^1\mathbf{H}$                            | -16.5 | -12.6 | 3.83 | 1.13 | -18.2 | -17.1 |

Three DFT functionals have been tested; B3LYP, PBE1PBE (a similar hybrid functional) and  $\omega$ B97X-D (a similar formulation to B3LYP but equipped to describe dispersion better). M06L results have been omitted as over 23 out of the 80 optimisations failed and had to be run as single points. Likewise, for the three functionals tested, 5 B3LYP, 5 PBE1PBE and 15  $\omega$ B97X-D structures needed to be run as single points (i.e. not free to optimise / adjust geometry parameters) due to failure to converge or giving an unwanted low negative frequency (and therefore not a true minima) based on the BP86 optimised starting geometry. The majority of these issues stem for low positive frequencies in the optimised BP86 geometries. These are shown in Table S3 with \* by their energy and free energy values. Additionally, three transition states were optimised to give a second low negative frequency, which are highlighted as yellow in the XYZ coordinates and energies pages. These were; B3LYP's TS(**B-C**)1·OAc, PBE1PBE's TS(**B-C**)2·OAc and  $\omega$ B97X-D's TS(**<sup>1</sup>B<sup>+</sup>-<sup>1</sup>C<sup>+</sup>**)2 (*t*-C<sub>6</sub>H<sub>6</sub>,*t*-O), and denoted as  $\Delta$ .

B3LYP and PBE1PBE both stabilise the “B” species more than the associated transition states for each pathway, thereby increasing the barrier to C-H activation for the majority of pathways and mechanisms in the manuscript. The largest changes were seen from  $\omega$ B97X-D, as this includes a dispersion description larger species were significantly stabilised. All three functionals did not capture the agostic nature of INT(**<sup>1</sup>B<sup>+</sup>-<sup>1</sup>C<sup>+</sup>**), leading to this species being much lower in energy than the equivalent BP86 geometry.

Ignoring the results of  $\omega$ B97X-D due to the additional dispersion stabilisation the bulkiest of species receive, for all B3LYP and PBE1PBE pathways that are viable (based on the BP86 equivalent *final* energies and the change in free energies relative to **A**) the barrier height is increased by 0.5 to 3.6 kcal mol<sup>-1</sup>. In some cases stabilisation of the preceding intermediate occurs, but in no way does that suggest the BP86 functional results are incorrect or favouring a different mechanism / pathway.

**Table S3** – Relative energies (in kcal mol<sup>-1</sup>) for computed optimised structures for different functionals. Data in bold are values from BP86 optimisations (see Table S1). All energies are quoted relative to **A** at 0.0 kcal/mol. Functionals; BP86 = **black**, B3LYP = **navy**, PBE1PBE = **teal**,  $\omega$ B97XD = **purple**. The delta ( $\Delta$ ) columns represent the energy difference from each respective  $\Delta E_{BS1}$  or  $\Delta G_{BS1}$  to the BP86 equivalent energy for that structure. Not all optimisations were successful, those denoted with \* are single point energies based on the BP86 geometry.

|                                          | BP86             |                  | B3LYP            |          |                  |          | PBE1PBE          |          |                  |          | $\omega$ B97X-D  |          |                  |          |
|------------------------------------------|------------------|------------------|------------------|----------|------------------|----------|------------------|----------|------------------|----------|------------------|----------|------------------|----------|
|                                          | $\Delta E_{BS1}$ | $\Delta G_{BS1}$ | $\Delta E_{BS1}$ | $\Delta$ | $\Delta G_{BS1}$ | $\Delta$ | $\Delta E_{BS1}$ | $\Delta$ | $\Delta G_{BS1}$ | $\Delta$ | $\Delta E_{BS1}$ | $\Delta$ | $\Delta G_{BS1}$ | $\Delta$ |
| <b>A</b>                                 | <b>0.0</b>       | <b>0.0</b>       | 0.0              |          | 0.0              |          | 0.0              |          | 0.0              |          | 0.0              |          | 0.0              |          |
| <b>B<sup>+</sup></b>                     | <b>113.5</b>     | <b>114.3</b>     | 113.1            | -0.4     | 114.2            | -0.8     | 110.7            | -2.8     | 112.3            | -2.0     | 102.2            | -11.3    | 104.1            | -10.3    |
| TS( <b>B<sup>+</sup>-C<sup>+</sup></b> ) | <b>128.2</b>     | <b>128.6</b>     | 129.3            | 1.1      | 129.6            | 1.1      | 126.6            | -1.6     | 127.14           | -1.5     | 119.1            | -9.1     | 119.7            | -8.9     |
| <b>C<sup>+</sup></b>                     | <b>112.8</b>     | <b>113.2</b>     | 115.5            | 2.7      | 116.6            | 3.4      | 110.6            | -2.2     | 111.5            | -1.7     | 106.3            | -6.6     | 107.5            | -5.6     |

|                                                         |              |              |       |       |                   |       |        |      |                   |      |       |       |       |       |
|---------------------------------------------------------|--------------|--------------|-------|-------|-------------------|-------|--------|------|-------------------|------|-------|-------|-------|-------|
| <b>B</b> ·OAc                                           | <b>14.8</b>  | <b>28.3</b>  | 13.5  | -1.3  | 26.9              | -1.4  | 9.5    | -5.3 | 23.2              | -5.1 | -4.6  | -19.4 | 11.3  | -17.0 |
| TS( <b>B-C</b> )1·OAc                                   | <b>28.0</b>  | <b>39.4</b>  | 28.3  | 0.3   | 40.5 <sup>^</sup> | 1.1   | 28.7*  | 0.7  | 43.9*             | 4.6  | 18.5* | -9.5  | 33.6* | -5.8  |
| INT( <b>B-C</b> )·OAc                                   | <b>24.0</b>  | <b>35.1</b>  | 26.9  | 2.9   | 38.2              | 3.1   | 22.5   | -1.5 | 34.0              | -1.1 | 13.9  | -10.1 | 26.3  | -8.8  |
| TS( <b>B-C</b> )2·OAc                                   | <b>24.2</b>  | <b>35.0</b>  | 31.3  | 7.1   | 41.2              | 6.3   | 24.5   | 0.3  | 36.1 <sup>^</sup> | 1.2  | 19.1  | -5.1  | 30.0  | -5.0  |
| <b>C</b> ·OAc                                           | <b>15.6</b>  | <b>28.2</b>  | 19.1  | 3.6   | 31.4              | 3.2   | 12.1   | -3.5 | 24.5              | -3.7 | 5.2   | -10.3 | 17.6  | -10.6 |
| <b>A</b> ·a-H                                           | <b>-3.7</b>  | <b>7.2</b>   | -5.2  | 5.3   | -1.6              | -1.9  | -6.9   | -3.3 | 4.3               | -2.8 | -16.0 | -12.3 | -2.5  | -9.6  |
| <b>B</b>                                                | <b>0.6</b>   | <b>15.2</b>  | 0.2   | -0.4  | 14.4              | -0.8  | -3.6   | -4.1 | 11.2              | -4.0 | -15.3 | -15.9 | -0.8  | -16.0 |
| TS( <b>B-C</b> )                                        | <b>30.6</b>  | <b>43.6</b>  | 34.5  | 3.9   | 47.1              | 3.5   | 29.0   | -1.6 | 42.4              | -1.2 | 20.2  | -10.4 | 34.4  | -9.2  |
| <b>C</b>                                                | <b>-13.4</b> | <b>0.7</b>   | -11.2 | 2.1   | 2.7               | 2.0   | -17.3  | -3.9 | -3.1              | -3.8 | -24.9 | -11.6 | -9.8  | -10.5 |
| <b>B'</b>                                               | <b>-2.0</b>  | <b>-0.1</b>  | -6.3  | -4.3  | -5.8              | -5.8  | 0.7    | 2.7  | 1.3               | 1.4  | -2.4  | -0.5  | -2.6  | -2.5  |
| TS( <b>B'-C'</b> )                                      | <b>19.9</b>  | <b>20.1</b>  | 12.7  | -7.1  | 13.2              | -7.0  | 22.7   | 2.8  | 22.8              | 2.7  | 19.0  | -0.8  | 18.6  | -1.5  |
| <b>C'</b>                                               | <b>22.2</b>  | <b>20.7</b>  | 13.2  | -8.9  | 11.0              | -9.7  | 22.7   | 0.6  | 21.4              | 0.6  | 17.8  | -4.3  | 17.1  | -3.6  |
| <b>C'</b> (no HOAc)                                     | <b>31.9</b>  | <b>18.9</b>  | 24.4  | -7.5  | 10.6              | -8.4  | 34.7   | 2.9  | 20.8              | 1.8  | 35.4  | 3.5   | 21.0  | 2.0   |
| <b>D</b>                                                | <b>-15.5</b> | <b>-0.3</b>  | -18.5 | -3.0  | -4.0              | -3.7  | -15.6  | -0.1 | -1.2              | -0.9 | -30.6 | -15.1 | -16.1 | -15.8 |
| TS( <b>D-E</b> )                                        | <b>6.3</b>   | <b>18.9</b>  | 5.2   | -1.1  | 16.9              | -2.0  | 6.8    | 0.5  | 18.5              | -0.4 | -6.9  | -13.2 | 4.9   | -14.0 |
| <b>E</b>                                                | <b>-9.0</b>  | <b>6.1</b>   | -14.1 | -5.1  | 0.3               | -5.9  | -11.8  | -2.8 | 2.6               | -3.8 | -26.5 | -17.5 | -12.5 | -18.6 |
| <b>E</b> (without HOAc)                                 | <b>-11.0</b> | <b>-7.9</b>  | -11.6 | -0.5  | -9.9              | -2.0  | -8.3   | 2.8  | -6.2              | 1.7  | -14.0 | -2.9  | -12.7 | -4.7  |
| <b>D</b> <sup>+</sup> ( $\eta^6$ )                      | <b>110.3</b> | <b>110.6</b> | 110.2 | -0.2  | 110.6             | 0.0   | 112.4* | 2.1  | 114.9*            | 4.3  | 94.8  | -15.6 | 96.7  | -13.9 |
| TS( <b>D<sup>+</sup>-E<sup>+</sup></b> ) ( $\eta^6$ )   | <b>124.5</b> | <b>125.1</b> | 125.8 | 1.3   | 126.2             | 1.0   | 123.4  | -1.1 | 123.7             | -1.4 | 112.7 | -11.8 | 113.4 | -11.7 |
| <b>E</b> <sup>+</sup> ( $\eta^6$ )                      | <b>108.8</b> | <b>110.1</b> | 11.9  | 3.0   | 113.1             | 3.0   | 107.1  | -1.7 | 108.3             | -1.8 | 100.4 | -8.4  | 101.2 | -8.9  |
| <b>D</b> <sup>+</sup> ( $\kappa^2$ )                    | <b>114.4</b> | <b>116.4</b> | 110.3 | -4.0  | 112.0             | -4.3  | 115.4  | 1.0  | 116.9             | 0.5  | 105.0 | -9.3  | 106.5 | -9.8  |
| TS( <b>D<sup>+</sup>-E<sup>+</sup></b> ) ( $\kappa^2$ ) | <b>131.0</b> | <b>129.7</b> | 131.3 | 0.3   | 129.4             | -0.3  | 133.8  | 2.8  | 132.1             | 2.4  | 126.7 | -4.3  | 124.8 | -4.9  |
| <b>E</b> <sup>+</sup> ( $\kappa^2$ )                    | <b>121.8</b> | <b>122.8</b> | 116.8 | -5.0  | 117.2             | -5.6  | 121.6  | -0.3 | 122.2             | -0.6 | 113.0 | -8.9  | 113.8 | -8.9  |
| <b>D</b> <sup>+</sup> ( $\kappa^1$ )                    | <b>127.0</b> | <b>127.3</b> | 106.3 | -20.7 | 108.2             | -19.1 | 129.6  | 2.6  | 129.8             | 2.8  | 100.6 | -9.3  | 106.5 | -9.8  |
| TS( <b>D<sup>+</sup>-E<sup>+</sup></b> ) ( $\kappa^1$ ) | <b>129.9</b> | <b>128.7</b> | 130.4 | 0.5   | 128.9             | 0.2   | 133.8  | 3.9  | 132.2             | 3.5  | 128.5 | -4.3  | 124.8 | -4.9  |
| <b>E</b> <sup>+</sup> ( $\kappa^1$ )                    | <b>127.3</b> | <b>128.2</b> | 124.8 | -2.6  | 125.7             | -2.4  | 128.7  | 1.4  | 129.5             | 1.4  | 121.7 | -8.9  | 113.8 | -8.9  |
| <b><sup>3</sup>D</b> <sup>+</sup>                       | <b>65.8</b>  | <b>110.9</b> | 64.7* | -1.1  | 109.6*            | 8.7   | 60.8   | -5.0 | 98.9              | -2.0 | 36.5  | -29.3 | 75.9  | -25.0 |
| INT( <b><sup>3</sup>D</b> <sup>+</sup> )                | <b>79.3</b>  | <b>115.0</b> | 73.1  | -6.2  | 109.7             | -5.3  | 73.0   | -6.3 | 110.5             | -4.5 | 49.8  | -29.5 | 88.4  | -26.6 |

|                                                                                                           |              |              |        |       |        |       |        |       |        |       |        |       |        |       |
|-----------------------------------------------------------------------------------------------------------|--------------|--------------|--------|-------|--------|-------|--------|-------|--------|-------|--------|-------|--------|-------|
| TS( <sup>3</sup> D+ <sup>-3</sup> E <sup>+</sup> )                                                        | <b>90.1</b>  | <b>123.3</b> | 90.4   | 0.3   | 125.2  | 1.9   | 87.7   | -2.4  | 122.9  | -0.4  | 76.4*  | -13.6 | 117.2* | -6.1  |
| <sup>3</sup> E <sup>+</sup>                                                                               | <b>84.4</b>  | <b>119.0</b> | 82.5   | -1.9  | 118.6  | -0.4  | 79.9   | -4.5  | 116.4  | -2.5  | 58.9   | -25.6 | 97.5   | -21.5 |
| <b><sup>1</sup>A</b>                                                                                      | <b>-9.9</b>  | <b>1.1</b>   | -12.9  | -3.0  | -1.6   | -2.7  | -7.4   | 2.5   | 4.2    | 3.1   | -5.2   | 4.8   | 10.3   | 9.2   |
| <b><sup>1</sup>A<sup>+</sup></b>                                                                          | <b>10.1</b>  | <b>20.8</b>  | 118.7  | -0.2  | 115.7  | 0.9   | 118.7  | -0.2  | 115.8  | 0.9   | 121.5* | 2.6   | 122.0* | 71    |
| <b><sup>6</sup>F<sup>2+</sup></b>                                                                         | <b>215.6</b> | <b>234.0</b> | 211.9* | -3.8  | 250.4* | 16.4  | 216.4* | 0.7   | 254.9* | 20.9  | 217.9* | 2.3   | 255.7* | 21.7  |
| <b><sup>3</sup>A<sup>2+</sup></b>                                                                         | <b>297.8</b> | <b>300.8</b> | 295.4  | -2.3  | 302.1  | 1.3   | 293.6  | -4.1  | 300.4  | -0.4  | 294.9* | -2.8  | 306.8* | 6.0   |
| <b><sup>5</sup>F<sup>+</sup> (<math>\kappa^1</math>)</b>                                                  | <b>54.4</b>  | <b>79.8</b>  | 52.3*  | -2.1  | 92.1*  | 12.3  | 54.7   | 0.3   | 83.6   | 3.8   | 59.9*  | 5.5   | 99.4*  | 19.5  |
| <b><sup>4</sup>F<sup>+</sup> (<math>\kappa^2</math>)</b>                                                  | <b>62.4</b>  | <b>77.6</b>  | 57.9   | -4.5  | 75.4   | -2.2  | 62.0   | 2.6   | 82.7   | 5.1   | 71.1*  | 8.7   | 97.6*  | 20.0  |
| <b>c-4F (2<math>\kappa^1</math>)</b>                                                                      | <b>-39.3</b> | <b>-9.6</b>  | -43.6  | -4.2  | -11.7  | -2.1  | -37.3  | 2.0   | -5.2   | 4.4   | -38.8  | 0.6   | -5.4   | 4.2   |
| <b>t-4F (2<math>\kappa^1</math>)</b>                                                                      | <b>-38.5</b> | <b>-9.6</b>  | -43.6  | -5.1  | -12.4  | -2.7  | -36.9  | 1.6   | -5.5   | 4.1   | -31.9* | 6.6   | 8.9*   | 18.5  |
| <b>f-3F (<math>\kappa^2\kappa^1</math>)</b>                                                               | <b>-34.6</b> | <b>-15.2</b> | -38.2  | -3.7  | -17.9  | -2.6  | -30.4  | 4.2   | -9.6   | 5.6   | -29.4  | 5.1   | -8.6   | 6.7   |
| <b>m-3F (<math>\kappa^2\kappa^1</math>)</b>                                                               | <b>-30.0</b> | <b>-13.4</b> | -36.8  | -6.8  | -17.1  | -3.7  | -28.5  | 1.5   | -8.8   | 4.6   | -19.8* | 10.2  | 7.5*   | 20.9  |
| <b>c-2F (2<math>\kappa^2</math>)</b>                                                                      | <b>-25.1</b> | <b>-16.8</b> | -30.0  | -4.8  | -21.2  | -4.3  | -20.0  | 5.1   | -11.2  | 5.6   | -18.1  | 7.1   | -10.0  | 4.2   |
| <b>t-2F (2<math>\kappa^2</math>)</b>                                                                      | <b>-23.2</b> | <b>-17.7</b> | -27.8* | -4.6  | -13.1* | 4.6   | -16.9* | 6.3   | -2.4*  | 15.3  | -18.9  | 4.3   | -11.0  | 19.5  |
| <b><sup>1</sup>B<sup>+</sup> (t-N, t-O)</b>                                                               | <b>110.1</b> | <b>121.4</b> | 105.7  | -4.4  | 117.5  | -3.9  | 108.7  | -1.4  | 120.7  | -0.7  | 103.0* | -7.1  | 118.5* | -2.9  |
| TS( <sup>1</sup> B <sup>+</sup> - <sup>1</sup> C <sup>+</sup> ) (t-N, t-O)                                | <b>127.1</b> | <b>137.5</b> | 124.2  | -2.9  | 135.4  | -2.1  | 127.9  | 0.8   | 139.2  | 1.7   | 119.7  | -7.3  | 130.8  | -6.6  |
| <b><sup>1</sup>C<sup>+</sup> (t-N, t-O)</b>                                                               | <b>103.8</b> | <b>115.0</b> | 103.7  | -0.2  | 115.5  | 0.5   | 103.7  | -0.1  | 115.8  | 0.8   | 96.2   | -7.6  | 107.8  | -7.2  |
| <b><sup>1</sup>B<sup>+</sup> (t-C<sub>6</sub>H<sub>6</sub>, t-O)</b>                                      | <b>109.8</b> | <b>120.8</b> | 104.5  | -5.3  | 115.9  | -5.0  | 108.2  | -1.6  | 120.1  | -0.8  | 97.2   | -12.6 | 109.2  | -11.7 |
| TS( <sup>1</sup> B <sup>+</sup> - <sup>1</sup> C <sup>+</sup> )1 (t-C <sub>6</sub> H <sub>6</sub> , t-O)  | <b>128.9</b> | <b>139.3</b> | 123.2  | -5.7  | 133.9  | -5.4  | 128.0  | -0.9  | 138.9  | -0.4  | 124.9* | -4.1  | 139.8* | 0.5   |
| INT ( <sup>1</sup> B <sup>+</sup> - <sup>1</sup> C <sup>+</sup> ) (t-C <sub>6</sub> H <sub>6</sub> , t-O) | <b>130.6</b> | <b>139.1</b> | 108.5  | -22.1 | 120.2  | -18.9 | 111.4  | -19.1 | 123.8  | -15.3 | 122.7  | -7.9  | 133.6  | -5.6  |
| TS( <sup>1</sup> B <sup>+</sup> - <sup>1</sup> C <sup>+</sup> )2 (t-C <sub>6</sub> H <sub>6</sub> , t-O)  | <b>130.7</b> | <b>138.8</b> | 131.2  | 0.5   | 138.8  | 0.0   | 133.0  | 2.3   | 141.3  | 2.5   | 125.2  | -5.4  | 134.9^ | -3.9  |
| <b><sup>1</sup>C<sup>+</sup> (t-C<sub>6</sub>H<sub>6</sub>, t-O)</b>                                      | <b>119.9</b> | <b>129.5</b> | 117.6  | -2.3  | 128.2  | -1.2  | 118.4  | -1.5  | 129.2  | -0.3  | 115.6* | -4.3  | 130.0* | 0.6   |
| <b><sup>1</sup>B<sup>+</sup> (t-O, t-N)</b>                                                               | <b>108.9</b> | <b>120.8</b> | 106.2  | -2.7  | 118.1  | -2.7  | 108.9  | 0.0   | 121.3  | 0.5   | 106.1* | -2.9  | 121.2* | 0.5   |
| TS( <sup>1</sup> B <sup>+</sup> - <sup>1</sup> C <sup>+</sup> ) (t-O, t-N)                                | <b>131.1</b> | <b>139.9</b> | 134.1  | 3.1   | 143.7  | 3.8   | 133.3  | 2.2   | 143.2  | 3.3   | 127.4  | -3.7  | 137.4  | -2.4  |
| <b><sup>1</sup>C<sup>+</sup> (t-O, t-N)</b>                                                               | <b>125.7</b> | <b>136.2</b> | 124.5  | -1.2  | 135.7  | -0.4  | 124.9  | -0.8  | 136.5  | 0.3   | 117.6  | -8.2  | 128.5  | -7.6  |
| <b><sup>1</sup>B<sup>+</sup> (t-O, t-C<sub>6</sub>H<sub>6</sub>)</b>                                      | <b>114.9</b> | <b>126.1</b> | 111.4  | -3.5  | 123.2  | -2.9  | 114.3  | -0.6  | 126.9  | 0.7   | 104.3  | -10.6 | 116.9  | -9.3  |
| TS( <sup>1</sup> B <sup>+</sup> - <sup>1</sup> C <sup>+</sup> ) (t-O, t-C <sub>6</sub> H <sub>6</sub> )   | <b>129.8</b> | <b>137.9</b> | 130.8  | 1.1   | 139.3  | 1.4   | 131.7  | 2.0   | 141.1  | 3.1   | 125.9  | -3.9  | 134.9  | -3.0  |
| <b><sup>1</sup>C<sup>+</sup> (t-O, t-C<sub>6</sub>H<sub>6</sub>)</b>                                      | <b>107.9</b> | <b>118.6</b> | 106.2  | -1.6  | 117.9  | -0.7  | 107.0  | -0.9  | 119.0  | 0.4   | 100.7  | -7.2  | 112.0  | -6.6  |

|                                                   |              |              |        |      |        |      |        |      |       |      |        |       |        |       |
|---------------------------------------------------|--------------|--------------|--------|------|--------|------|--------|------|-------|------|--------|-------|--------|-------|
| <b><sup>1</sup>B<sup>+</sup> (t-O,t-O)</b>        | <b>112.4</b> | <b>122.6</b> | 105.8  | -6.5 | 117.7  | -4.9 | 110.9  | -1.4 | 122.8 | 0.2  | 100.9  | -115. | 112.0  | -10.6 |
| <b><sup>4</sup>G<sup>+</sup> (κ<sup>1</sup>)</b>  | <b>59.6</b>  | <b>89.9</b>  | 54.4   | -5.2 | 87.2   | -2.7 | 57.8   | -1.8 | 89.9  | -0.1 | 47.5   | -12.1 | 80.8   | -9.1  |
| <b><sup>3</sup>G (2κ<sup>1</sup>)</b>             | <b>-35.5</b> | <b>-1.1</b>  | -40.1  | -4.8 | -4.5   | -3.5 | -36.3  | -1.0 | -0.3  | 0.7  | -47.9  | -12.6 | -10.8  | -9.8  |
| <b><sup>3</sup>G<sup>+</sup> (κ<sup>2</sup>)</b>  | <b>75.3</b>  | <b>94.6</b>  | 71.2   | -4.1 | 92.4   | -2.2 | 75.2   | -0.1 | 96.3  | 1.7  | 76.5*  | 1.1   | 104.4* | 9.8   |
| <b><sup>2</sup>G<sup>+</sup> (κ<sup>2</sup>)</b>  | <b>84.4</b>  | <b>92.7</b>  | 80.2   | -4.3 | 89.8   | -2.9 | 86.1   | 1.7  | 95.5  | 2.9  | 83.6   | -0.8  | 91.8   | -0.9  |
| <b><sup>1</sup>G (2κ<sup>2</sup>)</b>             | <b>-21.5</b> | <b>-11.1</b> | -27.3* | -5.8 | -10.9* | 0.2  | -17.4* | 4.1  | -1.4* | 9.6  | -22.3* | -0.7  | -6.3*  | 4.7   |
| <b><sup>2</sup>G (κ<sup>2</sup>κ<sup>1</sup>)</b> | <b>-29.7</b> | <b>-7.9</b>  | -31.2  | -1.5 | -8.5   | -0.6 | -27.1  | 2.6  | -4.5  | 3.4  | -31.0  | -1.3  | -10.0  | -2.1  |
| <b>TS(<sup>2</sup>G-<sup>2</sup>H)</b>            | <b>-27.9</b> | <b>-7.4</b>  | -25.2  | 2.7  | -4.3   | 3.0  | -23.7  | 4.2  | -2.8  | 4.6  | -25.4  | 2.5   | -4.4   | 3.0   |
| <b><sup>2</sup>H</b>                              | <b>-33.2</b> | <b>-10.8</b> | -33.6  | -0.4 | -10.5  | 0.3  | -31.8  | 1.4  | -8.7  | 2.1  | -34.8  | 1.6   | -11.1  | -0.4  |
| <b><sup>1</sup>G (κ<sup>2</sup>κ<sup>1</sup>)</b> | <b>-21.0</b> | <b>-10.0</b> | -22.7  | -1.7 | -11.6  | -1.5 | -17.0  | 4.0  | -6.1  | 3.9  | -19.2  | 1.8   | -8.6   | 1.4   |
| <b>TS(<sup>1</sup>G-<sup>1</sup>H)</b>            | <b>-19.9</b> | <b>-10.5</b> | -18.0  | 1.9  | -8.9   | 1.6  | -14.6  | 5.4  | -5.5  | 4.9  | -14.3  | 5.6   | -5.8   | 4.6   |
| <b><sup>1</sup>H</b>                              | <b>-27.1</b> | <b>-16.5</b> | -28.5  | -1.5 | -17.9  | -1.5 | -24.7  | 2.4  | -14.3 | 2.1  | -25.5  | 1.6   | -15.1  | 1.3   |

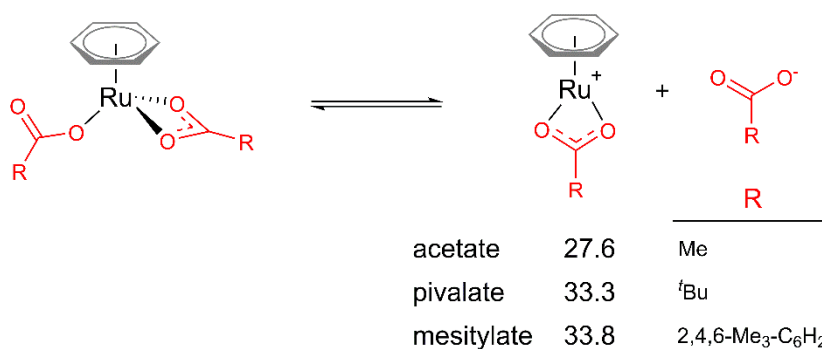

**Figure S1** – BP86-D3BJ(BS2,MeCN)//BP86(BS1) free energy values for different carboxylate ( $^-O_2CR$ ) dissociations from **A**,  $[(C_6H_6)Ru(O_2CR)_2]$ , in kcal mol<sup>-1</sup>

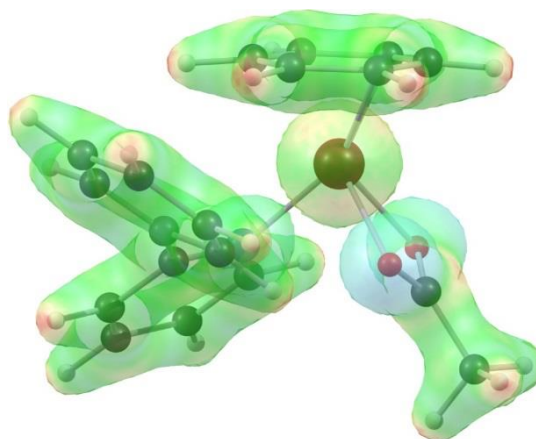

**Figure S2** – Electrostatic potential surface of **B<sup>+</sup>** to find potential acetate anion coordination “sites” / areas

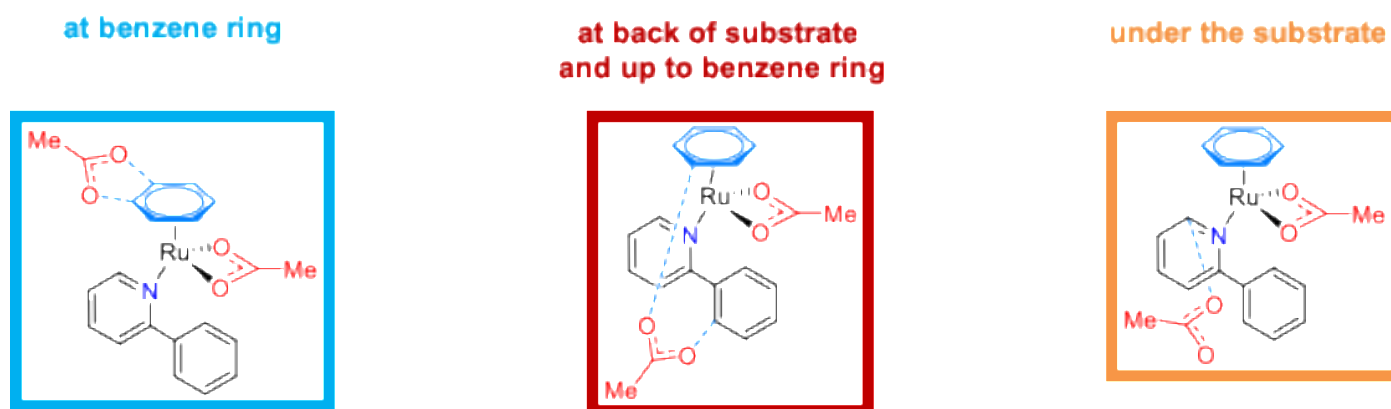

**Figure S3** – Three ion-pair binding sites were identified in **B<sup>+</sup>**, at the benzene ring (six isomers; a – f), at the “back” of the **a-H** substrate, and “under” the substrate. Computed values can be found for all eight isomers in the cartesian coordinates and energies section.

<sup>-</sup>OAc  
 SCF (BP86) Energy = -228.501360689  
 Enthalpy 0K = -228.454943  
 Enthalpy 298K = -228.449433  
 Free Energy 298K = -228.482845  
 Lowest Frequency = 29.1085 cm<sup>-1</sup>  
 Second Frequency = 394.2040 cm<sup>-1</sup>  
 SCF (BP86-D3BJ) Energy = -228.506682590  
 SCF (MeCN) Energy = -228.601950143  
 SCF (Toluene) Energy = -228.560110356  
 SCF (BS2) Energy = -228.606540536

O 0.69867 1.17860 0.00046  
 C 0.22375 0.00215 -0.00211  
 O 0.81598 -1.11868 0.00049  
 C -1.36311 -0.05746 -0.00077  
 H -1.76086 0.42591 0.91393  
 H -1.77069 0.51960 -0.85439  
 H -1.74949 -1.09295 -0.04983

AcOH  
 SCF (BP86) Energy = -229.088708932  
 Enthalpy 0K = -229.028635  
 Enthalpy 298K = -229.023037  
 Free Energy 298K = -229.056000  
 Lowest Frequency = 62.3881 cm<sup>-1</sup>  
 Second Frequency = 405.1869 cm<sup>-1</sup>  
 SCF (BP86-D3BJ) Energy = -229.094744166  
 SCF (MeCN) Energy = -229.094701290  
 SCF (Toluene) Energy = -229.091705970  
 SCF (BS2) Energy = -229.166189272

C 1.40382 -0.10154 -0.00001  
 H 1.92101 0.86628 -0.00014  
 H 1.69796 -0.68621 -0.88713  
 H 1.69816 -0.68609 0.88713  
 C -0.09248 0.12615 0.00017  
 O -0.65936 1.20853 -0.00004  
 O -0.77354 -1.06295 -0.00004  
 H -1.72193 -0.80631 -0.00013

**a**-H, 2-phenylpyridine  
 SCF (BP86) Energy = -479.337880864  
 Enthalpy 0K = -479.173096  
 Enthalpy 298K = -479.163059  
 Free Energy 298K = -479.208174  
 Lowest Frequency = 40.8265 cm<sup>-1</sup>  
 Second Frequency = 91.4535 cm<sup>-1</sup>  
 SCF (BP86-D3BJ) Energy = -479.377089966  
 SCF (MeCN) Energy = -479.343317783  
 SCF (Toluene) Energy = -479.340265969  
 SCF (BS2) Energy = -479.454661331

N -1.36753 -1.17191 -0.17495  
 C -2.71055 -1.21710 -0.18210  
 C -3.53632 -0.09266 -0.02278  
 H -3.15281 -2.21232 -0.32607  
 H -4.62575 -0.19223 -0.04405  
 C 0.72646 0.03168 -0.00419  
 C 1.47889 1.21545 -0.17705  
 C 2.82036 -1.22025 0.17294  
 C 2.88039 1.18198 -0.16888  
 H 0.97157 2.17082 -0.34574  
 C 3.55776 -0.03504 0.01029  
 H 3.34001 -2.17469 0.30982  
 H 3.44504 2.10951 -0.31122  
 H 4.65256 -0.05996 0.01751  
 C -0.76446 0.03302 0.00011  
 C -2.91551 1.14941 0.17447  
 H -3.51173 2.05619 0.32210  
 C -1.51758 1.21508 0.19240  
 H -1.01757 2.17046 0.37490

C 1.42054 -1.18858 0.16256  
 H 0.83156 -2.10225 0.28074

Benzene (C<sub>6</sub>H<sub>6</sub>)  
 SCF (BP86) Energy = -232.242069991  
 Enthalpy 0K = -232.144359  
 Enthalpy 298K = -232.138884  
 Free Energy 298K = -232.171901  
 Lowest Frequency = 397.4291 cm<sup>-1</sup>  
 Second Frequency = 397.4496 cm<sup>-1</sup>  
 SCF (BP86-D3BJ) Energy = -232.258991055  
 SCF (MeCN) Energy = -232.244669833  
 SCF (Toluene) Energy = =  
 SCF (BS2) Energy = -232.299996216

C -0.00852 1.40478 0.00000  
 C -1.22083 0.69500 0.00000  
 C -1.21231 -0.70976 0.00000  
 C 0.00852 -1.40477 0.00000  
 C 1.22083 -0.69500 0.00000  
 C 1.21230 0.70977 0.00000  
 H -2.17273 1.23691 0.00000  
 H -2.15756 -1.26318 0.00000  
 H 0.01517 -2.50009 0.00000  
 H 2.17273 -1.23691 0.00000  
 H 2.15756 1.26318 0.00000  
 H -0.01517 2.49996 0.00000

MeCN  
 SCF (BP86) Energy = -132.751073424  
 Enthalpy 0K = -132.706992  
 Enthalpy 298K = -132.702405  
 Free Energy 298K = -132.730016  
 Lowest Frequency = 373.9643 cm<sup>-1</sup>  
 Second Frequency = 373.9650 cm<sup>-1</sup>  
 SCF (BP86-D3BJ) Energy = -132.755185372  
 SCF (MeCN) Energy = -132.758518000  
 SCF (Toluene) Energy = -132.754759633  
 SCF (BS2) Energy = -132.790873881

C 0.00000 0.00000 -1.18538  
 H 0.00000 -1.03346 -1.56891  
 H 0.89501 0.51673 -1.56891  
 H -0.89501 0.51673 -1.56891  
 C 0.00000 0.00000 0.27726  
 N 0.00000 0.00000 1.45077

**A**

SCF (BP86) Energy = -784.308941980

Enthalpy 0K = -784.109005

Enthalpy 298K = -784.091970

Free Energy 298K = -784.154847

Lowest Frequency = 8.5076 cm<sup>-1</sup>Second Frequency = 52.9194 cm<sup>-1</sup>

SCF (BP86-D3BJ) Energy = -784.361136777

SCF (MeCN) Energy = -784.322848319

SCF (Toluene) Energy = -784.315480649

SCF (BS2) Energy = -784.216159690

C 1.74819 -0.95076 1.42935  
 C 2.51360 0.03836 0.70675  
 C 2.50983 0.03301 -0.71694  
 C 1.74286 -0.96256 -1.42923  
 C 1.01242 -1.95553 -0.71575  
 C 1.01490 -1.94982 0.72696  
 Ru 0.42692 0.04258 -0.00087  
 O -0.17123 1.79950 -1.09835  
 C -0.47086 2.39897 0.00138  
 C -1.16735 3.73253 0.00259  
 H 2.99563 0.84329 -1.26725  
 H 0.34152 -2.62622 1.25466  
 O -1.60638 -0.19648 -0.00574  
 C -2.25143 -1.35538 0.00024  
 O -1.74441 -2.48688 0.00915  
 O -0.17525 1.79558 1.10012  
 C -3.76885 -1.15049 -0.00459  
 H -4.07482 -0.56912 0.88086  
 H -4.07016 -0.57255 -0.89383  
 H -4.27716 -2.12467 -0.00374  
 H -2.25781 3.56333 -0.00030  
 H -0.90834 4.30023 0.90854  
 H -0.90419 4.30402 -0.89978  
 H 1.65933 -0.87544 2.51696  
 H 0.33694 -2.63609 -1.23540  
 H 1.65039 -0.89634 -2.51710  
 H 3.00248 0.85238 1.24869

[(C<sub>6</sub>H<sub>6</sub>)Ru(OAc)]<sup>+</sup>

SCF (BP86) Energy = -555.552331451

Enthalpy 0K = -555.402417

Enthalpy 298K = -555.390582

Free Energy 298K = -555.440931

Lowest Frequency = 30.6721 cm<sup>-1</sup>Second Frequency = 46.2829 cm<sup>-1</sup>

SCF (BP86-D3BJ) Energy = -555.588306393

SCF (MeCN) Energy = -555.632258049

SCF (Toluene) Energy = -555.597739758

SCF (BS2) Energy = -555.383426681

C 1.75665 -1.44628 0.19123  
 C 1.38699 -0.72314 1.37541  
 C 1.38699 0.72308 1.37544  
 C 1.75666 1.44627 0.19129  
 C 2.03601 0.72200 -0.99762  
 C 2.03601 -0.72196 -0.99765  
 Ru 0.10122 0.00000 -0.17310  
 O -1.65481 1.09577 0.02265  
 C -2.35963 0.00000 -0.01163  
 H 1.03130 1.26338 2.25781  
 H 2.16439 -1.25883 -1.94240  
 O -1.65481 -1.09576 0.02265  
 H 1.67634 -2.53636 0.16743  
 H 2.16441 1.25891 -1.94235  
 H 1.67635 2.53635 0.16753  
 H 1.03130 -1.26347 2.25775  
 C -3.84441 -0.00000 -0.05740  
 H -4.21429 -0.90905 -0.55386  
 H -4.22402 -0.00003 0.98156  
 H -4.21430 0.90906 -0.55382

-OtBu

SCF (BP86) Energy = -346.450213517

Enthalpy 0K = -346.321651

Enthalpy 298K = -346.313239

Free Energy 298K = -346.352484

Lowest Frequency = -27.1798 cm<sup>-1</sup>Second Frequency = 205.8424 cm<sup>-1</sup>

SCF (BP86-D3BJ) Energy = -346.471301993

SCF (MeCN) Energy = -346.541159640

SCF (Toluene) Energy = -346.502381228

SCF (BS2) Energy = -346.574851177

O -1.61207 -1.14713 -0.03947  
 C -1.07240 0.00007 -0.05642  
 O -1.61214 1.14724 -0.03947  
 C 0.54322 0.00004 -0.01674  
 C 1.09211 -1.27045 -0.68659  
 H 0.93136 -1.23965 -1.78107  
 H 2.18050 -1.40979 -0.50988  
 H 0.53120 -2.13737 -0.30050  
 C 1.09227 1.27150 -0.68461  
 H 0.53153 2.13793 -0.29718  
 H 2.18069 1.41036 -0.50773  
 H 0.93144 1.24245 -1.77912  
 C 0.92422 -0.00120 1.48034  
 H 0.50278 -0.89437 1.97639  
 H 2.02450 -0.00156 1.63689  
 H 0.50319 0.89136 1.97784

[(C<sub>6</sub>H<sub>6</sub>)Ru(OtBu)<sub>2</sub>]

SCF (BP86) Energy = -1020.18455813

Enthalpy 0K = -1019.819295

Enthalpy 298K = -1019.794047

Free Energy 298K = -1019.875552

Lowest Frequency = 8.8353 cm<sup>-1</sup>Second Frequency = 16.5328 cm<sup>-1</sup>

SCF (BP86-D3BJ) Energy = -1020.27192980

SCF (MeCN) Energy = -1020.19744502

SCF (Toluene) Energy = -1020.19029340

SCF (BS2) Energy = -1020.14281408

C -0.41960 -2.60729 -1.50164  
 C -1.65456 -2.61766 -0.75190  
 C -1.62140 -2.70033 0.66908  
 C -0.35043 -2.76210 1.35183  
 C 0.86727 -2.78001 0.61202  
 C 0.83107 -2.70262 -0.82794  
 Ru -0.33416 -1.03330 0.01771  
 O -1.27106 0.45960 1.25667  
 C -1.63552 1.12475 0.21443  
 H -2.54589 -2.60385 1.24457  
 H 1.76943 -2.57738 -1.36936  
 O 1.13195 0.39916 0.02316  
 C 2.43726 0.17611 -0.02027  
 O 2.98989 -0.93397 -0.07515  
 O -1.39141 0.59076 -0.93327  
 H -0.44450 -2.43495 -2.58143  
 H 1.83128 -2.71181 1.11722  
 H -0.32150 -2.70563 2.44385  
 H -2.60533 -2.45654 -1.26717  
 C -2.31414 2.47646 0.33215  
 H -2.50000 2.63326 1.41100  
 C -1.36810 3.58237 -0.18789  
 H -1.83915 4.57209 -0.06288  
 H -0.41181 3.58276 0.35953  
 H -1.15049 3.43228 -1.25806  
 C -3.66533 2.48593 -0.42459  
 H -4.07309 3.51257 -0.36967  
 H -3.46853 2.28120 -1.49281  
 C -4.69777 1.48853 0.12116  
 H -5.65013 1.56255 -0.43032



## XYZ Coordinates and Computed Energies

H -4.34061 0.44814 0.02717  
H -4.91190 1.67408 1.18839  
C 3.26058 1.49986 0.00791  
C 2.94462 2.25535 1.32165  
H 3.51068 3.20348 1.36077  
H 1.86957 2.48304 1.39612  
H 3.22925 1.65607 2.20438  
C 2.85251 2.37110 -1.20457  
H 3.42017 3.31911 -1.19947  
H 3.06818 1.85465 -2.15653  
H 1.77667 2.60405 -1.17758  
C 4.76347 1.16843 -0.06151  
H 5.00827 0.62022 -0.98551  
H 5.35592 2.10057 -0.03981  
H 5.07204 0.53760 0.78749

[(C<sub>6</sub>H<sub>6</sub>)Ru(OtBu)]<sup>+</sup>

SCF (BP86) Energy = -673.494518023  
Enthalpy 0K = -673.262135  
Enthalpy 298K = -673.246174  
Free Energy 298K = -673.306141  
Lowest Frequency = 10.9134 cm<sup>-1</sup>  
Second Frequency = 38.1474 cm<sup>-1</sup>  
SCF (BP86-D3BJ) Energy = -673.547145247  
SCF (MeCN) Energy = -673.569789385  
SCF (Toluene) Energy = -673.537047121  
SCF (BS2) Energy = -673.351017571

C -2.51715 1.44601 0.16286  
C -2.17948 0.72311 1.35604  
C -2.17943 -0.72308 1.35607  
C -2.51704 -1.44605 0.16292  
C -2.76173 -0.72199 -1.03377  
C -2.76179 0.72189 -1.03380  
Ru -0.84991 0.00001 -0.15677  
O 0.89509 -1.09401 0.04956  
C 1.61016 0.00002 0.00177  
H -1.84957 -1.26329 2.24836  
H -2.86528 1.25883 -1.98146  
O 0.89510 1.09406 0.04953  
H -2.43759 2.53612 0.14164  
H -2.86513 -1.25897 -1.98141  
H -2.43738 -2.53615 0.14173  
H -1.84966 1.26339 2.24831  
C 3.11304 0.00003 -0.04403  
C 3.62494 -1.27872 -0.74607  
H 3.32265 -1.30373 -1.80600  
H 4.72604 -1.29000 -0.70723  
H 3.25347 -2.19183 -0.25575  
C 3.62502 1.27936 -0.74489  
H 3.25372 2.19205 -0.25367  
H 4.72614 1.29046 -0.70613  
H 3.32266 1.30542 -1.80477  
C 3.56062 -0.00070 1.45763  
H 3.20415 -0.89962 1.98590  
H 4.66290 -0.00074 1.48072  
H 3.20421 0.89776 1.98674

<sup>-</sup>OMes

SCF (BP86) Energy = -538.202534223  
Enthalpy 0K = -538.023840  
Enthalpy 298K = -538.010464  
Free Energy 298K = -538.062679  
Lowest Frequency = 40.9704 cm<sup>-1</sup>  
Second Frequency = 76.0093 cm<sup>-1</sup>  
SCF (BP86-D3BJ) Energy = -538.242672971  
SCF (MeCN) Energy = -538.289235123  
SCF (Toluene) Energy = -538.251220410  
SCF (BS2) Energy = -538.367686377

O -2.71489 0.75466 0.87067  
C -2.17084 0.00076 0.00714

## Ru(II) Carboxylate Structures (Figures 2 &amp; 3)

O -2.72492 -0.75171 -0.85105  
C -0.61382 -0.00028 0.00159  
C 0.11664 -1.21994 0.07278  
C 0.11655 1.21883 -0.08025  
C 1.52454 -1.20068 0.07386  
C 1.52423 1.19897 -0.09611  
C 2.25413 -0.00088 -0.01161  
H 2.06861 -2.15572 0.13216  
H 2.06776 2.15319 -0.16995  
C -0.61498 2.54417 -0.15307  
H -1.09730 2.68302 -1.13969  
H -1.43158 2.53627 0.58884  
H 0.07278 3.39385 0.01084  
C -0.61453 -2.54582 0.13859  
H -1.08802 -2.69418 1.12813  
H -1.43773 -2.53077 -0.59592  
H 0.07188 -3.39385 -0.03914  
C 3.76979 0.00130 0.01983  
H 4.16867 0.09061 1.05059  
H 4.18576 -0.93140 -0.40264  
H 4.18744 0.84668 -0.55673

[(C<sub>6</sub>H<sub>6</sub>)Ru(OMes)<sub>2</sub>]

SCF (BP86) Energy = -1403.66917957  
Enthalpy 0K = -1403.205117  
Enthalpy 298K = -1403.171310  
Free Energy 298K = -1403.273704  
Lowest Frequency = 10.8509 cm<sup>-1</sup>  
Second Frequency = 15.4577 cm<sup>-1</sup>  
SCF (BP86-D3BJ) Energy = -1403.79835972  
SCF (MeCN) Energy = -1403.68375095  
SCF (Toluene) Energy = -1403.67558344  
SCF (BS2) Energy = -1403.71317397

C 0.05828 -3.82693 1.39774  
C 1.32536 -3.95451 0.71441  
C 1.37693 -3.96178 -0.70922  
C 0.15651 -3.79667 -1.46055  
C -1.09992 -3.68765 -0.79448  
C -1.14365 -3.70157 0.64666  
Ru 0.29280 -2.16405 -0.02151  
O 1.36649 -0.73979 -1.19962  
C 1.84507 -0.17211 -0.13922  
H 2.34147 -3.96936 -1.22350  
H -2.08966 -3.47832 1.14193  
O -0.95984 -0.54140 0.12944  
C -2.28267 -0.57220 0.07260  
O -2.98871 -1.58324 -0.08862  
O 1.58148 -0.76757 0.98056  
H 0.03573 -3.73222 2.48681  
H -2.01080 -3.45526 -1.34685  
H 0.20606 -3.67015 -2.54614  
H 2.25440 -3.95332 1.29125  
C -2.90010 0.80706 0.20547  
C -3.81909 1.24483 -0.78480  
C -2.60162 1.63251 1.32129  
C -4.40555 2.51572 -0.64991  
C -3.23231 2.88630 1.42192  
C -4.12725 3.35427 0.44402  
H -5.10751 2.85595 -1.42193  
H -3.01374 3.51623 2.29364  
C 2.64222 1.07700 -0.20492  
C 3.71912 1.28083 0.70728  
C 2.32441 2.06746 -1.18149  
C 4.46595 2.46670 0.60927  
C 3.09405 3.24276 -1.21457  
C 4.16866 3.46422 -0.33580  
H 5.30671 2.61529 1.29796  
H 2.84272 4.01085 -1.95614  
C -4.17970 0.38061 -1.97615  
H -3.28299 0.06816 -2.54036  
H -4.68222 -0.54463 -1.65132

## XYZ Coordinates and Computed Energies

H -4.84298 0.92640 -2.66679  
 C -1.65271 1.19075 2.41756  
 H -1.94986 0.21493 2.84157  
 H -0.62655 1.06591 2.03661  
 H -1.64074 1.92524 3.23948  
 C -4.75439 4.72816 0.55288  
 H -4.13238 5.49407 0.05264  
 H -5.74945 4.75805 0.07789  
 H -4.86795 5.03922 1.60493  
 C 4.10705 0.26909 1.76680  
 H 3.35998 0.23099 2.57667  
 H 4.17331 -0.75346 1.36002  
 H 5.08322 0.53287 2.20526  
 C 1.18008 1.92165 -2.16329  
 H 1.41050 1.17364 -2.94003  
 H 0.25664 1.58085 -1.66852  
 H 0.98133 2.88624 -2.65798  
 C 4.96251 4.75110 -0.38577  
 H 4.50491 5.52347 0.26007  
 H 5.99676 4.60310 -0.03355  
 H 5.00125 5.16357 -1.40759

$[(C_6H_6)Ru(OMes)]^+$

SCF (BP86) Energy = -865.249489758  
 Enthalpy 0K = -864.967005  
 Enthalpy 298K = -864.947082  
 Free Energy 298K = -865.016888  
 Lowest Frequency = 20.1591  $cm^{-1}$   
 Second Frequency = 27.7342  $cm^{-1}$   
 SCF (BP86-D3BJ) Energy = -865.321718849  
 SCF (MeCN) Energy = -865.313119253  
 SCF (Toluene) Energy = -865.286081042  
 SCF (BS2) Energy = -865.147858194

C 3.57009 -1.44425 0.06350  
 C 3.39394 -0.71769 1.28309  
 C 3.39540 0.72738 1.27751  
 C 3.57193 1.44381 0.05226  
 C 3.64588 0.71655 -1.16848  
 C 3.64568 -0.72712 -1.16290  
 Ru 1.87125 0.00016 -0.07315  
 O 0.14868 1.09737 0.05495  
 C -0.59258 0.00003 0.04079  
 H 3.18909 1.27086 2.20400  
 H 3.62326 -1.26896 -2.11281  
 O 0.14867 -1.09737 0.05169  
 H 3.48691 -2.53409 0.05854  
 H 3.62352 1.25091 -2.12265  
 H 3.49019 2.53367 0.03846  
 H 3.18670 -1.25358 2.21380  
 C -2.03341 0.00006 0.01638  
 C -2.75534 -1.25487 0.00850  
 C -2.75521 1.25499 0.00819  
 C -4.15241 -1.21070 -0.00292  
 C -4.15237 1.21094 -0.00336  
 C -4.87571 0.00019 -0.01220  
 H -4.70462 -2.15670 -0.00334  
 H -4.70451 2.15696 -0.00429  
 C -2.09800 -2.61632 0.01612  
 H -1.45500 -2.76703 -0.86648  
 H -1.45212 -2.75585 0.89842  
 H -2.86855 -3.40208 0.02173  
 C -2.09783 2.61641 0.01519  
 H -1.45311 2.75682 0.89819  
 H -1.45364 2.76618 -0.86671  
 H -2.86834 3.40223 0.01897  
 C -6.38020 -0.00012 -0.05683  
 H -6.72790 -0.01227 -1.10728  
 H -6.80232 -0.89138 0.43388  
 H -6.80260 0.90146 0.41411

Toluene (tol)

## Ru(II) Carboxylate Structures (Figures 2 &amp; 3)

SCF (BP86) Energy = -271.559258208  
 Enthalpy 0K = -271.434921  
 Enthalpy 298K = -271.427571  
 Free Energy 298K = -271.465906  
 Lowest Frequency = 28.8277  $cm^{-1}$   
 Second Frequency = 202.7218  $cm^{-1}$   
 SCF (BP86-D3BJ) Energy = -271.581062971  
 SCF (MeCN) Energy = -271.561882000  
 SCF (Toluene) Energy = -271.560395742  
 SCF (BS2) Energy = -271.625271803

C -0.92053 0.00019 -0.01166  
 C -0.19611 1.20978 -0.00912  
 C 1.20745 1.21254 0.00223  
 C 1.91518 -0.00010 0.00874  
 C 1.20713 -1.21270 0.00223  
 C -0.19629 -1.20969 -0.00912  
 H 1.74913 2.16470 0.00119  
 H 1.74878 -2.16489 0.00120  
 H 3.01022 -0.00030 0.01415  
 C -2.43505 0.00007 0.00930  
 H -2.84739 -0.88826 -0.49773  
 H -2.82119 -0.00848 1.04567  
 H -2.84733 0.89648 -0.48326  
 H -0.74124 2.16125 -0.01840  
 H -0.74170 -2.16101 -0.01841

$[(tol)Ru(OAc)_2]$

SCF (BP86) Energy = -823.628702029  
 Enthalpy 0K = -823.402023  
 Enthalpy 298K = -823.383196  
 Free Energy 298K = -823.449027  
 Lowest Frequency = 24.7333  $cm^{-1}$   
 Second Frequency = 54.4412  $cm^{-1}$   
 SCF (BP86-D3BJ) Energy = -823.687423812  
 SCF (MeCN) Energy = -823.643044922  
 SCF (Toluene) Energy = -823.635287216  
 SCF (BS2) Energy = -823.544299887

C 0.34933 -2.03279 1.09089  
 C 0.38594 -2.22353 -0.33270  
 C 1.33295 -1.52259 -1.13241  
 H -0.46814 -2.46660 1.66770  
 H -0.41736 -2.79483 -0.80066  
 H 1.27999 -1.59127 -2.22301  
 C 1.28492 -1.12992 1.68877  
 C 2.28371 -0.46172 0.89818  
 C 2.28685 -0.61450 -0.52448  
 H 1.19172 -0.88268 2.75084  
 Ru 0.24907 -0.07062 0.10805  
 O 0.28174 1.84944 -0.88370  
 C -0.15389 2.41879 0.18568  
 O -0.24959 1.69063 1.24362  
 C -0.56664 3.86594 0.19205  
 H 0.01396 4.43424 -0.54971  
 H -1.63389 3.93154 -0.08081  
 H -0.43920 4.29798 1.19561  
 O -1.72829 0.12183 -0.39754  
 C -2.64277 -0.83110 -0.27552  
 C -4.03454 -0.32617 -0.66768  
 H -4.40695 0.36249 0.10990  
 H -3.99496 0.23697 -1.61352  
 H -4.72739 -1.17466 -0.75710  
 O -2.45837 -1.99137 0.12087  
 C 3.22648 0.18441 -1.39299  
 H 3.59981 1.07580 -0.86560  
 H 4.09508 -0.43503 -1.68227  
 H 2.72239 0.51645 -2.31463  
 H 2.94771 0.27185 1.36425

*o*-xylene (*o*-xyl)

SCF (BP86) Energy = -310.876056618

## XYZ Coordinates and Computed Energies

Enthalpy 0K = -310.724572  
 Enthalpy 298K = -310.715838  
 Free Energy 298K = -310.756261  
 Lowest Frequency = 132.8543 cm<sup>-1</sup>  
 Second Frequency = 155.6289 cm<sup>-1</sup>  
 SCF (BP86-D3BJ) Energy = -310.903701384  
 SCF (MeCN) Energy = -310.878807439  
 SCF (Toluene) Energy = -310.877237271  
 SCF (BS2) Energy = -310.949972732

C 0.48160 0.71045 0.00000  
 C -0.75001 1.39259 0.00000  
 C -1.97137 0.70092 0.00000  
 C -1.97138 -0.70092 0.00000  
 C -0.75001 -1.39259 0.00000  
 C 0.48159 -0.71046 0.00000  
 H -2.91540 1.25611 0.00000  
 H -0.74711 -2.48926 0.00000  
 C 1.78295 -1.48324 0.00000  
 H -2.91540 -1.25610 0.00000  
 H 2.40099 -1.24585 0.88567  
 H 1.60141 -2.57003 -0.00016  
 H 2.40114 -1.24562 -0.88550  
 C 1.78295 1.48324 0.00000  
 H 2.40106 1.24575 0.88559  
 H 2.40107 1.24572 -0.88558  
 H 1.60141 2.57003 -0.00002  
 H -0.74710 2.48926 0.00000

[(*o*-xyl)Ru(OAc)<sub>2</sub>]

SCF (BP86) Energy = -862.944926979  
 Enthalpy 0K = -862.691562  
 Enthalpy 298K = -862.670810  
 Free Energy 298K = -862.742334  
 Lowest Frequency = 5.2173 cm<sup>-1</sup>  
 Second Frequency = 53.0388 cm<sup>-1</sup>  
 SCF (BP86-D3BJ) Energy = -863.010885089  
 SCF (MeCN) Energy = -862.959552984  
 SCF (Toluene) Energy = -862.951647539  
 SCF (BS2) Energy = -862.868680272

C 0.10292 -2.07046 -0.99455  
 C -0.00117 -2.26331 0.42456  
 C 0.93449 -1.64039 1.29509  
 C 2.00861 -0.81087 0.78036  
 C 2.15115 -0.64060 -0.64137  
 C 1.15795 -1.24881 -1.49796  
 Ru 0.07554 -0.10740 -0.01530  
 O -1.92840 0.24622 0.25828  
 C -2.89678 -0.63535 0.05190  
 O -2.76404 -1.81598 -0.30383  
 O 0.15187 1.78792 1.02988  
 C -0.10965 2.41168 -0.06543  
 O -0.13687 1.71632 -1.14895  
 C -0.40712 3.88735 -0.07537  
 C -4.27848 -0.01630 0.28533  
 H -4.30476 0.52776 1.24299  
 H -4.49446 0.71422 -0.51280  
 H -5.04668 -0.80219 0.27318  
 H -1.49059 4.03082 0.07729  
 H 0.12528 4.39264 0.74416  
 H -0.13324 4.32950 -1.04467  
 H 0.78999 -1.70290 2.37785  
 H -0.69194 -2.43456 -1.64636  
 H 1.17243 -1.00026 -2.56477  
 H -0.88388 -2.76580 0.82288  
 C 2.92260 -0.10552 1.75605  
 H 3.02019 0.96617 1.52168  
 H 2.53348 -0.18765 2.78243  
 H 3.93298 -0.55269 1.73432  
 C 3.24304 0.20908 -1.24859  
 H 3.46360 1.10143 -0.64283

## Ru(II) Carboxylate Structures (Figures 2 &amp; 3)

H 4.17995 -0.37188 -1.33759  
 H 2.95808 0.54593 -2.25766

*p*-cymene (*p*-cym)

SCF (BP86) Energy = -389.500963444  
 Enthalpy 0K = -389.294560  
 Enthalpy 298K = -389.282766  
 Free Energy 298K = -389.331806  
 Lowest Frequency = 27.5335 cm<sup>-1</sup>  
 Second Frequency = 39.1086 cm<sup>-1</sup>  
 SCF (BP86-D3BJ) Energy = -389.538808507  
 SCF (MeCN) Energy = -389.503525007  
 SCF (Toluene) Energy = -389.502062924  
 SCF (BS2) Energy = -389.592347940

C 0.21782 1.34626 0.00880  
 C -0.63077 0.22312 0.00387  
 C -0.02574 -1.05185 -0.01100  
 C 1.36824 -1.19298 -0.01922  
 C 2.21724 -0.06636 -0.01057  
 C 1.61461 1.20576 0.00059  
 C -2.14898 0.38600 0.00847  
 H -0.65273 -1.95130 -0.02077  
 C 3.72322 -0.22432 0.01049  
 H 2.24790 2.10115 0.00118  
 H -0.22349 2.35057 0.01492  
 H 1.80879 -2.19736 -0.03467  
 H 4.23031 0.68736 -0.34624  
 H 4.09272 -0.42601 1.03323  
 H 4.05168 -1.06628 -0.62247  
 H -2.35703 1.47386 0.02431  
 C -2.79155 -0.19235 -1.27228  
 C -2.78799 -0.22881 1.27383  
 H -3.87835 -0.05489 1.28625  
 H -2.62379 -1.32018 1.31289  
 H -2.35873 0.20705 2.19142  
 H -3.88200 -0.01845 -1.27673  
 H -2.36486 0.26980 -2.17812  
 H -2.62700 -1.28207 -1.34302

[(*p*-cym)Ru(OAc)<sub>2</sub>]

SCF (BP86) Energy = -941.573231537  
 Enthalpy 0K = -941.264458  
 Enthalpy 298K = -941.241076  
 Free Energy 298K = -941.316954  
 Lowest Frequency = 23.7871 cm<sup>-1</sup>  
 Second Frequency = 38.7196 cm<sup>-1</sup>  
 SCF (BP86-D3BJ) Energy = -941.651020035  
 SCF (MeCN) Energy = -941.586490428  
 SCF (Toluene) Energy = -941.579377161  
 SCF (BS2) Energy = -941.514155902

Ru 0.19383 -0.26148 0.18626  
 O 1.47195 1.13945 -0.59538  
 C 1.55210 2.40725 -0.21658  
 C 2.65062 3.15286 -0.98080  
 C -1.97767 0.12686 0.01133  
 O 0.86365 2.96970 0.64842  
 O 2.02459 -1.41266 0.12992  
 C 1.86940 -1.62624 -1.13028  
 C 2.94745 -2.28363 -1.95052  
 O 0.76889 -1.22987 -1.66661  
 H 3.63772 2.74578 -0.70359  
 H 2.53178 3.00838 -2.06681  
 H 2.61613 4.22361 -0.73563  
 H 3.61129 -1.50137 -2.35689  
 H 3.55051 -2.95773 -1.32441  
 H 2.50631 -2.83365 -2.79505  
 C -1.74446 -1.26288 0.35228  
 C -0.95376 -1.63012 1.47839  
 C -1.38091 1.11822 0.84803  
 C -0.55846 0.76086 1.97341

## XYZ Coordinates and Computed Energies

C -0.31494 -0.61480 2.28633  
H -1.42069 2.17080 0.55869  
H -0.72098 -2.68470 1.65481  
C -2.81044 0.54120 -1.19631  
H -2.46915 1.55692 -1.47344  
H -0.01017 1.55113 2.48937  
H -2.09846 -2.04879 -0.32087  
C 0.63051 -1.00605 3.39508  
H 0.06013 -1.23921 4.31296  
H 1.21626 -1.89778 3.12045  
H 1.33028 -0.18782 3.62501  
C -4.29923 0.63567 -0.78336  
H -4.91053 0.99177 -1.63018  
H -4.68678 -0.35305 -0.47952  
H -4.44345 1.33083 0.06069  
C -2.62585 -0.36981 -2.42515  
H -3.15447 0.06119 -3.29209  
H -1.56132 -0.48516 -2.68425  
H -3.05171 -1.37517 -2.25657

C<sub>6</sub>Me<sub>6</sub> (Bn\*)

SCF (BP86) Energy = -468.126901047  
Enthalpy 0K = -467.867928  
Enthalpy 298K = -467.851887  
Free Energy 298K = -467.910997  
Lowest Frequency = 39.4803 cm<sup>-1</sup>  
Second Frequency = 54.8645 cm<sup>-1</sup>  
SCF (BP86-D3BJ) Energy = -468.179037098  
SCF (MeCN) Energy = -468.129608459  
SCF (Toluene) Energy = -468.128025243  
SCF (BS2) Energy = -468.232580905

C 0.06877 -1.41549 0.00986  
C -1.19138 -0.76729 -0.00996  
C -1.26015 0.64811 0.01006  
C -0.06879 1.41546 -0.00990  
C 1.19134 0.76726 0.00997  
C 1.26012 -0.64815 -0.00997  
C 0.14260 -2.93319 0.07354  
H -0.72304 -3.36056 0.60280  
H 0.16887 -3.39830 -0.93159  
H 1.04215 -3.27425 0.60897  
C 2.61162 -1.34256 -0.07351  
H 3.02864 -1.54993 0.93168  
H 2.54905 -2.30708 -0.60065  
H 3.35594 -0.73466 -0.61084  
C -2.46905 -1.58969 -0.07371  
H -2.31443 -2.54052 -0.60680  
H -2.86037 -1.84253 0.93141  
H -3.27094 -1.05435 -0.60527  
C -2.61152 1.34278 0.07380  
H -3.02790 1.55181 -0.93132  
H -3.35633 0.73438 0.60984  
H -2.54887 2.30651 0.60239  
C 2.46908 1.58957 0.07361  
H 3.27059 1.05457 0.60611  
H 2.86099 1.84133 -0.93154  
H 2.31433 2.54093 0.60570  
C -0.14269 2.93314 -0.07377  
H -0.16844 3.39846 0.93128  
H 0.72266 3.36043 -0.60358  
H -1.04256 3.27406 -0.60877

[(Bn\*)Ru(OAc)<sub>2</sub>]

SCF (BP86) Energy = -1020.20321509  
Enthalpy 0K = -1019.841450  
Enthalpy 298K = -1019.814071  
Free Energy 298K = -1019.897732  
Lowest Frequency = 26.4238 cm<sup>-1</sup>  
Second Frequency = 45.3947 cm<sup>-1</sup>  
SCF (BP86-D3BJ) Energy = -1020.30133902  
SCF (MeCN) Energy = -1020.21860888

## Ru(II) Carboxylate Structures (Figures 2 &amp; 3)

SCF (Toluene) Energy = -1020.20993497  
SCF (BS2) Energy = -1020.15863897

C -0.47135 -1.54500 -1.26527  
C -0.15387 -2.03802 0.04735  
C -0.84913 -1.54578 1.21868  
C -1.48897 -0.51268 -1.40648  
C -2.27509 -0.08914 -0.27406  
C -1.87607 -0.53596 1.04763  
Ru -0.08389 0.18699 0.09084  
O -0.11475 2.12128 1.06084  
C 0.39841 2.66924 0.01457  
O 0.53916 1.93289 -1.03113  
C 0.84960 4.10688 0.02679  
H 0.22750 4.69903 0.71452  
H 1.89275 4.15107 0.38421  
H 0.81397 4.53076 -0.98763  
O 1.86787 0.25589 0.78510  
C 2.88402 -0.14452 0.04315  
C 4.23824 0.14507 0.69976  
H 4.61309 1.11461 0.32788  
H 4.15815 0.20704 1.79545  
H 4.96477 -0.62863 0.40898  
O 2.81947 -0.67697 -1.07853  
C -2.52071 0.09767 2.26491  
H -3.34553 -0.53360 2.64565  
H -1.79058 0.23432 3.07552  
H -2.92856 1.09053 2.03248  
C -3.42353 0.89387 -0.43149  
H -4.24149 0.64292 0.26292  
H -3.12195 1.93620 -0.22735  
H -3.84157 0.85756 -1.44798  
C -1.69569 0.13396 -2.76123  
H -2.34151 -0.49182 -3.40527  
H -2.15749 1.12647 -2.67049  
H -0.73263 0.27416 -3.27341  
C 0.29653 -2.07256 -2.45982  
H -0.16761 -1.77691 -3.41062  
H 1.33421 -1.69755 -2.43019  
H 0.32653 -3.17563 -2.43536  
C 0.97017 -3.04302 0.18593  
H 0.63103 -4.03542 -0.16651  
H 1.83519 -2.73368 -0.41949  
H 1.30297 -3.15266 1.22630  
C -0.46960 -2.06790 2.59258  
H -0.51187 -3.17096 2.60792  
H 0.55311 -1.76578 2.87463  
H -1.15315 -1.70695 3.37265

## XYZ Coordinates and Computed Energies

## Ru(II) Carboxylate Structures (Figure 4)

**B<sup>+</sup>**

SCF (BP86) Energy = -1034.96464167  
 Enthalpy 0K = -1034.646883  
 Enthalpy 298K = -1034.624860  
 Free Energy 298K = -1034.697996  
 Lowest Frequency = 26.7530 cm<sup>-1</sup>  
 Second Frequency = 39.6295 cm<sup>-1</sup>  
 SCF (BP86-D3BJ) Energy = -1035.06637398  
 SCF (MeCN) Energy = -1035.02251539  
 SCF (Toluene) Energy = -1034.99853602  
 SCF (BS2) Energy = -1034.90693552

|    |          |          |          |
|----|----------|----------|----------|
| C  | -0.21819 | 2.19516  | 0.80183  |
| C  | -2.82350 | 1.44584  | -1.91348 |
| C  | -3.88326 | 1.88636  | -1.10133 |
| C  | -4.14580 | 1.23904  | 0.11816  |
| C  | -2.26433 | -0.27171 | -0.27429 |
| C  | -1.42260 | -3.79348 | 0.85045  |
| O  | 1.09415  | 0.17151  | -1.89536 |
| C  | 2.10835  | -0.61945 | -1.79947 |
| O  | 2.56487  | -0.79370 | -0.60133 |
| C  | 2.70409  | -1.30986 | -2.98702 |
| H  | -1.94363 | -4.73456 | 1.04987  |
| H  | 2.52298  | -0.72406 | -3.89982 |
| H  | 3.78258  | -1.46479 | -2.83563 |
| H  | 2.23033  | -2.29943 | -3.11146 |
| H  | -4.97611 | 1.56951  | 0.74978  |
| H  | -4.51283 | 2.72103  | -1.42490 |
| H  | -2.63322 | 1.92929  | -2.87691 |
| C  | 0.58485  | -2.47133 | 0.72347  |
| H  | 1.66590  | -2.35016 | 0.81569  |
| C  | -0.03177 | -3.69328 | 0.99506  |
| H  | 0.57818  | -4.54222 | 1.31396  |
| C  | -1.46512 | -1.44831 | 0.16699  |
| Ru | 1.04765  | 0.45053  | 0.23399  |
| C  | 2.36643  | 1.36614  | 1.70998  |
| H  | 3.34570  | 0.96662  | 1.99038  |
| C  | 2.26603  | 2.27251  | 0.59906  |
| H  | 3.16187  | 2.57104  | 0.04958  |
| C  | 0.97160  | 2.64534  | 0.13011  |
| H  | 0.87988  | 3.21906  | -0.79682 |
| C  | 1.19660  | 0.91145  | 2.39870  |
| H  | 1.28318  | 0.19406  | 3.21815  |
| C  | -0.09221 | 1.32821  | 1.92602  |
| H  | -0.99510 | 0.90360  | 2.37342  |
| H  | -1.20487 | 2.44157  | 0.40388  |
| C  | -2.13100 | -2.66424 | 0.43018  |
| H  | -3.21208 | -2.70334 | 0.27401  |
| C  | -3.35023 | 0.15619  | 0.52381  |
| H  | -3.56371 | -0.35534 | 1.46915  |
| N  | -0.10368 | -1.36032 | 0.32838  |
| C  | -2.01297 | 0.37556  | -1.50494 |
| H  | -1.19376 | 0.03366  | -2.14270 |

**TS (B<sup>+</sup>-C<sup>+</sup>)**

SCF (BP86) Energy = -1034.94113282  
 Enthalpy 0K = -1034.624885  
 Enthalpy 298K = -1034.603321  
 Free Energy 298K = -1034.675315  
 Lowest Frequency = -100.9920 cm<sup>-1</sup>  
 Second Frequency = 28.4528 cm<sup>-1</sup>  
 SCF (BP86-D3BJ) Energy = -1035.04430926  
 SCF (MeCN) Energy = -1035.00319665  
 SCF (Toluene) Energy = -1034.97699319  
 SCF (BS2) Energy = -1034.88392504

|   |         |         |          |
|---|---------|---------|----------|
| C | 0.10375 | 2.68553 | -0.52549 |
| N | 0.53067 | 1.42284 | -0.27049 |
| C | 1.84584 | 1.19800 | 0.04503  |
| C | 2.76659 | 2.26266 | 0.05003  |
| C | 2.33517 | 3.55899 | -0.25098 |
| C | 0.97698 | 3.77629 | -0.53197 |

|    |          |          |          |
|----|----------|----------|----------|
| Ru | -0.79734 | -0.22475 | -0.38828 |
| C  | -2.57627 | -1.44370 | -0.95168 |
| C  | -2.47856 | -0.24158 | -1.74208 |
| C  | -1.27741 | 0.04715  | -2.47293 |
| C  | -0.16723 | -0.87437 | -2.43755 |
| C  | -0.24994 | -2.02660 | -1.61921 |
| C  | -1.45263 | -2.30146 | -0.86246 |
| H  | -1.19086 | 0.98857  | -3.02354 |
| C  | 2.19153  | -0.18812 | 0.41211  |
| C  | 3.45038  | -0.75870 | 0.13727  |
| C  | 3.71001  | -2.09223 | 0.49222  |
| C  | 2.72444  | -2.86922 | 1.13093  |
| C  | 1.46788  | -2.31145 | 1.41171  |
| C  | 1.19724  | -0.97747 | 1.04967  |
| H  | -1.46669 | -3.13603 | -0.15688 |
| O  | -1.91076 | 1.04580  | 0.85042  |
| C  | -2.08910 | 0.46716  | 2.02313  |
| O  | -1.59227 | -0.65075 | 2.28740  |
| C  | -2.91251 | 1.25463  | 3.02324  |
| H  | -2.24053 | 1.64726  | 3.80514  |
| H  | -3.44256 | 2.09427  | 2.55274  |
| H  | -3.62853 | 0.57984  | 3.51682  |
| H  | 4.21919  | -0.17284 | -0.37685 |
| H  | 4.68868  | -2.52824 | 0.26975  |
| H  | 0.70420  | -2.88530 | 1.94566  |
| H  | 2.94595  | -3.90044 | 1.42232  |
| H  | 3.80631  | 2.06547  | 0.32345  |
| H  | 0.28136  | -0.52083 | 1.49721  |
| H  | -3.45280 | -1.61882 | -0.32386 |
| H  | 0.62674  | -2.66500 | -1.48674 |
| H  | -3.28651 | 0.49439  | -1.71415 |
| H  | 0.76466  | -0.63152 | -2.95505 |
| H  | 0.58935  | 4.77462  | -0.74919 |
| H  | 3.04371  | 4.39229  | -0.24485 |
| H  | -0.96618 | 2.79801  | -0.71266 |

**C<sup>+</sup>**

SCF (BP86) Energy = -1034.96564411  
 Enthalpy 0K = -1034.648482  
 Enthalpy 298K = -1034.626399  
 Free Energy 298K = -1034.699841  
 Lowest Frequency = 22.7322 cm<sup>-1</sup>  
 Second Frequency = 23.9055 cm<sup>-1</sup>  
 SCF (BP86-D3BJ) Energy = -1035.06869494  
 SCF (MeCN) Energy = -1035.02349528  
 SCF (Toluene) Energy = -1034.99949265  
 SCF (BS2) Energy = -1034.90637128

|    |          |          |          |
|----|----------|----------|----------|
| C  | 0.40471  | 2.73165  | -0.03461 |
| N  | 0.60472  | 1.40614  | -0.25033 |
| C  | 1.87946  | 0.93347  | -0.46556 |
| C  | 2.96447  | 1.83212  | -0.50765 |
| C  | 2.75119  | 3.19927  | -0.31562 |
| C  | 1.44748  | 3.65943  | -0.06273 |
| Ru | -0.94982 | 0.00526  | -0.21935 |
| C  | -3.07382 | -0.69899 | -0.01615 |
| C  | -3.20028 | 0.72823  | -0.20931 |
| C  | -2.53645 | 1.33880  | -1.28790 |
| C  | -1.74274 | 0.53519  | -2.19309 |
| C  | -1.71507 | -0.88664 | -2.06205 |
| C  | -2.40815 | -1.51703 | -0.96835 |
| H  | -2.56963 | 2.42497  | -1.41420 |
| C  | 1.95161  | -0.52229 | -0.58683 |
| C  | 3.14327  | -1.23342 | -0.84143 |
| C  | 3.13129  | -2.63297 | -0.89087 |
| C  | 1.92917  | -3.32567 | -0.67246 |
| C  | 0.73428  | -2.62189 | -0.42449 |
| C  | 0.70697  | -1.20638 | -0.38755 |
| H  | -2.36583 | -2.59984 | -0.83223 |
| O  | -0.81945 | 0.23503  | 1.91944  |
| C  | -0.16545 | -0.38526 | 2.79847  |
| O  | 0.67610  | -1.36863 | 2.53436  |

## XYZ Coordinates and Computed Energies

C -0.30403 -0.04608 4.25503  
H 0.67627 0.25981 4.65644  
H -1.03548 0.75960 4.39287  
H -0.61560 -0.94331 4.81481  
H 4.08530 -0.69880 -1.00308  
H 4.05616 -3.18165 -1.09011  
H -0.18409 -3.19394 -0.25243  
H 1.91486 -4.42026 -0.69746  
H 3.97299 1.44897 -0.68096  
H 0.71822 -1.50103 1.53710  
H -3.50867 -1.15900 0.87585  
H -1.12231 -1.48723 -2.75633  
H -3.73334 1.33212 0.52941  
H -1.17049 1.01585 -2.99105  
H 1.23459 4.71729 0.10903  
H 3.59131 3.89888 -0.35154  
H -0.62608 3.03250 0.16572

**B**·OAc

SCF (BP86) Energy = -1263.62317136  
Enthalpy 0K = -1263.257959  
Enthalpy 298K = -1263.229825  
Free Energy 298K = -1263.317921  
Lowest Frequency = 25.6024 cm<sup>-1</sup>  
Second Frequency = 37.4299 cm<sup>-1</sup>  
SCF (BP86-D3BJ) Energy = -1263.74415414  
SCF (MeCN) Energy = -1263.64507734  
SCF (Toluene) Energy = -1263.63339724  
SCF (BS2) Energy = -1263.64784484

C -0.46161 -1.76693 1.51405  
N -0.24142 -0.52532 0.99936  
C -1.09453 0.49047 1.33635  
C -2.16626 0.25235 2.21940  
C -2.37928 -1.01938 2.75623  
C -1.50538 -2.05168 2.39359  
Ru 1.28668 -0.41104 -0.48730  
C 2.51627 -0.70733 -2.29770  
C 1.49504 -1.72436 -2.20492  
C 0.11463 -1.37159 -2.09993  
C -0.25311 0.01589 -2.03318  
C 0.74369 1.03348 -2.06852  
C 2.13413 0.66300 -2.19486  
H -0.71204 -2.08420 -1.88362  
C -0.91977 1.86356 0.77906  
C -1.96168 2.40288 -0.00948  
C -1.85237 3.71383 -0.50028  
C -0.72478 4.49678 -0.19821  
C 0.30488 3.96259 0.59558  
C 0.21174 2.65002 1.08462  
H 2.90935 1.43224 -2.12033  
O 2.41315 -1.65165 0.87383  
C 2.87205 -0.61774 1.49326  
O 2.53753 0.53438 1.03040  
C 3.73074 -0.75858 2.72133  
H 4.39110 0.11433 2.82880  
H 3.08352 -0.81466 3.61387  
H 4.32235 -1.68453 2.66940  
H -2.80200 1.75040 -0.28240  
H -2.65255 4.12251 -1.12655  
H 1.18202 4.57050 0.84194  
H -0.64919 5.52170 -0.57746  
H -2.82381 1.08958 2.46518  
H 1.01665 2.23273 1.69595  
H 3.57374 -0.98453 -2.31664  
H 0.47114 2.07996 -1.90745  
H 1.79636 -2.77468 -2.13353  
H -1.32727 0.19775 -1.78225  
H -1.63343 -3.07349 2.75849  
H -3.21674 -1.20284 3.43625  
H 0.23300 -2.54297 1.19017  
O -2.42767 -2.41964 -1.07886

## Ru(II) Carboxylate Structures (Figure 4)

C -3.25082 -1.45930 -0.94474  
C -4.69609 -1.82118 -0.52833  
H -4.78361 -2.88282 -0.25024  
H -5.02652 -1.18383 0.30997  
H -5.38056 -1.61558 -1.37032  
O -3.02804 -0.21126 -1.13702

TS (**B-C**)1·OAc

SCF (BP86) Energy = -1263.60220672  
Enthalpy 0K = -1263.238938  
Enthalpy 298K = -1263.211039  
Free Energy 298K = -1263.300286  
Lowest Frequency = -98.0070 cm<sup>-1</sup>  
Second Frequency = 14.9814 cm<sup>-1</sup>  
SCF (BP86-D3BJ) Energy = -1263.72302944  
SCF (MeCN) Energy = -1263.62618544  
SCF (Toluene) Energy = -1263.61358679  
SCF (BS2) Energy = -1263.62848166

C -1.49738 -0.90450 1.51044  
N -0.64116 -0.00742 0.96830  
C -0.77849 1.32488 1.25593  
C -1.79338 1.76882 2.11751  
C -2.67940 0.84125 2.68149  
C -2.52449 -0.51513 2.37868  
Ru 0.82754 -0.64569 -0.41941  
C 1.90495 -1.78381 -1.98488  
C 0.62325 -2.37601 -1.68194  
C -0.57901 -1.59451 -1.75320  
C -0.51344 -0.20648 -2.14428  
C 0.74881 0.38981 -2.39842  
C 1.95899 -0.39822 -2.30058  
H -1.57684 -1.93525 -1.37723  
C 0.20697 2.23233 0.63415  
C -0.14380 3.52405 0.19141  
C 0.81285 4.34017 -0.43134  
C 2.13154 3.88294 -0.61476  
C 2.49121 2.59929 -0.17752  
C 1.53360 1.77247 0.43891  
H 2.93303 0.09233 -2.38813  
O 1.30458 -1.95113 1.16773  
C 2.50462 -1.67542 1.61426  
O 3.20413 -0.74177 1.15270  
C 2.99001 -2.54747 2.76348  
H 2.82009 -2.01244 3.71379  
H 2.45051 -3.50486 2.80302  
H 4.07241 -2.72007 2.66669  
H -1.17675 3.87063 0.29605  
H 0.52553 5.33622 -0.78329  
H 3.51775 2.23539 -0.28680  
H 2.87475 4.53152 -1.08990  
H -1.86586 2.83443 2.34943  
H 1.90210 0.83483 0.90961  
H 2.82815 -2.34930 -1.83710  
H 0.82527 1.46785 -2.56322  
H 0.58385 -3.39738 -1.29153  
H -1.47156 0.34931 -2.03512  
H -3.20039 -1.27611 2.77416  
H -3.47686 1.17714 3.35118  
H -1.34550 -1.94651 1.23511  
O -3.24944 -1.70733 -0.60796  
C -3.79558 -0.57311 -0.85909  
C -5.31827 -0.48356 -0.61425  
H -5.84788 -0.72317 -1.55400  
H -5.64540 -1.20966 0.14709  
H -5.61026 0.53834 -0.32277  
O -3.22693 0.47049 -1.31213

INT (**B-C**)·OAc

SCF (BP86) Energy = -1263.60859226  
Enthalpy 0K = -1263.246053  
Enthalpy 298K = -1263.217946

## XYZ Coordinates and Computed Energies

Free Energy 298K = -1263.307081  
 Lowest Frequency = 16.8261 cm<sup>-1</sup>  
 Second Frequency = 20.6744 cm<sup>-1</sup>  
 SCF (BP86-D3BJ) Energy = -1263.72734511  
 SCF (MeCN) Energy = -1263.63483730  
 SCF (Toluene) Energy = -1263.62081428  
 SCF (BS2) Energy = -1263.63294424

|    |          |          |          |
|----|----------|----------|----------|
| C  | -1.47077 | 1.40945  | 0.67366  |
| N  | -0.22043 | 1.08108  | 0.26945  |
| C  | 0.74123  | 2.04610  | 0.09029  |
| C  | 0.44228  | 3.39484  | 0.33857  |
| C  | -0.84613 | 3.74923  | 0.76432  |
| C  | -1.80840 | 2.74772  | 0.93030  |
| Ru | 0.29891  | -0.90401 | -0.13812 |
| C  | 0.77529  | -2.91730 | -1.02702 |
| C  | -0.49888 | -2.96658 | -0.39519 |
| C  | -1.52957 | -2.01962 | -0.72837 |
| C  | -1.26932 | -0.99975 | -1.69802 |
| C  | 0.00642  | -0.94031 | -2.35541 |
| C  | 1.02508  | -1.87113 | -1.98661 |
| H  | -2.47004 | -1.92948 | -0.16499 |
| C  | 2.05064  | 1.53671  | -0.34281 |
| C  | 3.00290  | 2.32126  | -1.02123 |
| C  | 4.21999  | 1.75726  | -1.43123 |
| C  | 4.50477  | 0.40515  | -1.15967 |
| C  | 3.56492  | -0.38463 | -0.48495 |
| C  | 2.31824  | 0.15592  | -0.08898 |
| H  | 2.03237  | -1.75623 | -2.39766 |
| O  | -0.11153 | -1.18362 | 1.89064  |
| C  | 0.76751  | -0.91393 | 2.82273  |
| O  | 1.92392  | -0.47454 | 2.62014  |
| C  | 0.26297  | -1.15152 | 4.24073  |
| H  | -0.16535 | -0.20940 | 4.62375  |
| H  | -0.52490 | -1.91765 | 4.26003  |
| H  | 1.10175  | -1.43565 | 4.89253  |
| H  | 2.78273  | 3.36791  | -1.25629 |
| H  | 4.95118  | 2.37454  | -1.96281 |
| H  | 3.80181  | -1.42232 | -0.22668 |
| H  | 5.46571  | -0.02348 | -1.46250 |
| H  | 1.22348  | 4.14987  | 0.21761  |
| H  | 1.91872  | -0.29489 | 0.93486  |
| H  | 1.57404  | -3.60242 | -0.73249 |
| H  | 0.23202  | -0.13167 | -3.05540 |
| H  | -0.66143 | -3.66624 | 0.43009  |
| H  | -2.04409 | -0.19810 | -1.80452 |
| H  | -2.83168 | 2.97710  | 1.23651  |
| H  | -1.08989 | 4.79804  | 0.96101  |
| H  | -2.21980 | 0.59437  | 0.74148  |
| O  | -3.82410 | -0.41084 | 0.31395  |
| C  | -4.22540 | 0.35402  | -0.63298 |
| C  | -5.74749 | 0.59359  | -0.72609 |
| H  | -6.22508 | -0.28838 | -1.18969 |
| H  | -6.18578 | 0.70618  | 0.27904  |
| H  | -5.97567 | 1.47462  | -1.34571 |
| O  | -3.49036 | 0.91937  | -1.50965 |

## TS (B-C) 2 · OAc

SCF (BP86) Energy = -1263.60826342  
 Enthalpy 0K = -1263.247706  
 Enthalpy 298K = -1263.220274  
 Free Energy 298K = -1263.307321  
 Lowest Frequency = -254.6594 cm<sup>-1</sup>  
 Second Frequency = 17.4118 cm<sup>-1</sup>  
 SCF (BP86-D3BJ) Energy = -1263.72730471  
 SCF (MeCN) Energy = -1263.63363514  
 SCF (Toluene) Energy = -1263.62006693  
 SCF (BS2) Energy = -1263.63182435

|   |          |         |         |
|---|----------|---------|---------|
| C | -1.47326 | 1.43725 | 0.63003 |
| N | -0.22675 | 1.09516 | 0.22399 |
| C | 0.73527  | 2.05311 | 0.00423 |

## Ru(II) Carboxylate Structures (Figure 4)

|    |          |          |          |
|----|----------|----------|----------|
| C  | 0.43699  | 3.40967  | 0.20813  |
| C  | -0.84786 | 3.77866  | 0.63187  |
| C  | -1.80835 | 2.78372  | 0.84335  |
| Ru | 0.29010  | -0.89714 | -0.12900 |
| C  | 0.74283  | -2.93705 | -0.96854 |
| C  | -0.51580 | -2.97029 | -0.30046 |
| C  | -1.56755 | -2.05175 | -0.64137 |
| C  | -1.33569 | -1.05539 | -1.63793 |
| C  | -0.07359 | -1.00222 | -2.32515 |
| C  | 0.95992  | -1.92095 | -1.96529 |
| H  | -2.49595 | -1.95738 | -0.05991 |
| C  | 2.03800  | 1.51856  | -0.41353 |
| C  | 3.02460  | 2.28689  | -1.06014 |
| C  | 4.23677  | 1.69686  | -1.44637 |
| C  | 4.47866  | 0.33552  | -1.17979 |
| C  | 3.50181  | -0.43607 | -0.53725 |
| C  | 2.25485  | 0.12461  | -0.15716 |
| H  | 1.95311  | -1.81540 | -2.41160 |
| O  | -0.03498 | -1.11966 | 1.93456  |
| C  | 0.88508  | -0.80369 | 2.79000  |
| O  | 2.01966  | -0.33506 | 2.47711  |
| C  | 0.54573  | -1.03012 | 4.25268  |
| H  | 0.64394  | -0.07780 | 4.79817  |
| H  | -0.47347 | -1.42271 | 4.36576  |
| H  | 1.27243  | -1.73429 | 4.68962  |
| H  | 2.83815  | 3.34172  | -1.28879 |
| H  | 4.99679  | 2.29978  | -1.95345 |
| H  | 3.71167  | -1.48284 | -0.28964 |
| H  | 5.43470  | -0.11632 | -1.46477 |
| H  | 1.21549  | 4.16124  | 0.05291  |
| H  | 1.95104  | -0.24581 | 1.01005  |
| H  | 1.55011  | -3.61413 | -0.67900 |
| H  | 0.12768  | -0.21112 | -3.05217 |
| H  | -0.65121 | -3.64656 | 0.54920  |
| H  | -2.11805 | -0.26346 | -1.75203 |
| H  | -2.82852 | 3.02366  | 1.15173  |
| H  | -1.09050 | 4.83392  | 0.79240  |
| H  | -2.22135 | 0.62480  | 0.73840  |
| O  | -3.83108 | -0.40512 | 0.42871  |
| C  | -4.27110 | 0.31799  | -0.53376 |
| C  | -5.79887 | 0.53472  | -0.58902 |
| H  | -6.27867 | -0.37172 | -1.00025 |
| H  | -6.20740 | 0.68386  | 0.42394  |
| H  | -6.05827 | 1.38629  | -1.23693 |
| O  | -3.57105 | 0.85888  | -1.45321 |

## C · OAc

SCF (BP86) Energy = -1263.62198852  
 Enthalpy 0K = -1263.257396  
 Enthalpy 298K = -1263.229328  
 Free Energy 298K = -1263.318043  
 Lowest Frequency = 13.2243 cm<sup>-1</sup>  
 Second Frequency = 26.8130 cm<sup>-1</sup>  
 SCF (BP86-D3BJ) Energy = -1263.74066362  
 SCF (MeCN) Energy = -1263.64702057  
 SCF (Toluene) Energy = -1263.63384899  
 SCF (BS2) Energy = -1263.64567358

|    |          |          |          |
|----|----------|----------|----------|
| C  | -1.45480 | 1.51994  | 0.41280  |
| N  | -0.22655 | 1.11216  | 0.00571  |
| C  | 0.74124  | 2.02803  | -0.34493 |
| C  | 0.45747  | 3.40247  | -0.29801 |
| C  | -0.81174 | 3.83592  | 0.11029  |
| C  | -1.77198 | 2.88558  | 0.47469  |
| Ru | 0.25983  | -0.91440 | -0.14336 |
| C  | 0.49765  | -3.09846 | -0.63849 |
| C  | -0.69269 | -2.94896 | 0.15269  |
| C  | -1.75549 | -2.08106 | -0.23400 |
| C  | -1.57851 | -1.25154 | -1.38187 |
| C  | -0.39182 | -1.36502 | -2.18912 |
| C  | 0.63997  | -2.28881 | -1.80974 |
| H  | -2.63063 | -1.87411 | 0.39770  |

## XYZ Coordinates and Computed Energies

## Ru(II) Carboxylate Structures (Figure 4)

|   |          |          |          |
|---|----------|----------|----------|
| C | 2.02641  | 1.41571  | -0.70061 |
| C | 3.15744  | 2.14208  | -1.12788 |
| C | 4.36239  | 1.47870  | -1.39450 |
| C | 4.44408  | 0.08612  | -1.22033 |
| C | 3.31601  | -0.64357 | -0.80352 |
| C | 2.07272  | -0.01078 | -0.54602 |
| H | 1.57062  | -2.32622 | -2.38414 |
| O | 0.42599  | -0.86021 | 2.01105  |
| C | 1.32934  | -0.41853 | 2.75879  |
| O | 2.47522  | 0.08088  | 2.31843  |
| C | 1.17657  | -0.42402 | 4.25578  |
| H | 1.17312  | 0.61481  | 4.62600  |
| H | 0.23800  | -0.91863 | 4.53526  |
| H | 2.03574  | -0.93459 | 4.72002  |
| H | 3.10097  | 3.22885  | -1.25666 |
| H | 5.23722  | 2.04596  | -1.72748 |
| H | 3.40686  | -1.72849 | -0.67023 |
| H | 5.38806  | -0.43575 | -1.41350 |
| H | 1.23137  | 4.12369  | -0.57399 |
| H | 2.45733  | 0.03854  | 1.30783  |
| H | 1.29852  | -3.77216 | -0.32404 |
| H | -0.24813 | -0.71232 | -3.05420 |
| H | -0.75303 | -3.47442 | 1.11178  |
| H | -2.34858 | -0.46333 | -1.55867 |
| H | -2.77983 | 3.17047  | 0.78531  |
| H | -1.04255 | 4.90572  | 0.14028  |
| H | -2.20917 | 0.74434  | 0.66491  |
| O | -3.87019 | -0.21526 | 0.79994  |
| C | -4.41826 | 0.33211  | -0.22268 |
| C | -5.94623 | 0.54879  | -0.14801 |
| H | -6.45835 | -0.40723 | -0.36007 |
| H | -6.24747 | 0.85826  | 0.86632  |
| H | -6.28095 | 1.28960  | -0.89077 |
| O | -3.82912 | 0.69548  | -1.29261 |



**A · a-H**

SCF (BP86) Energy = -1263.65263818  
 Enthalpy 0K = -1263.287059  
 Enthalpy 298K = -1263.258636  
 Free Energy 298K = -1263.351606  
 Lowest Frequency = 10.1944 cm<sup>-1</sup>  
 Second Frequency = 12.9810 cm<sup>-1</sup>  
 SCF (BP86-D3BJ) Energy = -1263.75713265  
 SCF (MeCN) Energy = -1263.66744502  
 SCF (Toluene) Energy = -1263.65942668  
 SCF (BS2) Energy = -1263.67410493

C -2.03846 -1.22732 -2.06263  
 C -0.67425 -0.80322 -1.89221  
 C -0.37019 0.59361 -1.88843  
 C 2.38988 1.57040 0.68609  
 C 2.48394 2.97064 0.69290  
 H 1.64958 3.56056 1.08688  
 C 2.19012 -1.42497 0.38612  
 H 1.25795 -0.90274 0.62018  
 O -2.11006 -1.12039 1.10758  
 C -1.91672 -3.08199 2.41688  
 H -2.90567 -2.82531 2.82656  
 H -1.82889 -4.16907 2.27923  
 H -1.15878 -2.75558 3.14993  
 C -1.67107 -2.36804 1.08539  
 O -1.09674 -2.93429 0.13937  
 O -3.29578 1.27713 0.90001  
 C -2.30886 1.65572 1.63302  
 O -1.12260 1.39318 1.20024  
 H 1.48218 1.10878 1.08672  
 C -2.52737 2.34399 2.95226  
 H -2.60499 1.57836 3.74322  
 H -1.67803 3.00128 3.18994  
 H -3.46603 2.91724 2.93428  
 C 3.63827 3.60917 0.21138  
 H 3.70910 4.70215 0.21935  
 C 3.45416 0.77960 0.19184  
 C 4.61441 1.43488 -0.28218  
 H 5.43588 0.81526 -0.65227  
 C 4.70434 2.83231 -0.27388  
 H 5.61156 3.31896 -0.64842  
 N 4.54648 -1.35383 -0.15676  
 C 2.18847 -2.82378 0.30164  
 H 1.25049 -3.36895 0.45375  
 C 3.38865 -0.71175 0.14994  
 C 3.38829 -3.48228 -0.00648  
 H 3.43915 -4.57277 -0.08425  
 C 4.53129 -2.69615 -0.22403  
 H 5.49122 -3.17060 -0.47065  
 Ru -1.94388 0.23995 -0.42319  
 C -1.40078 1.57546 -2.10618  
 H -1.16942 2.64118 -2.03550  
 C -2.75123 1.14086 -2.24356  
 H -3.55789 1.87935 -2.26458  
 C -3.07631 -0.26733 -2.23548  
 H -4.12176 -0.58560 -2.26184  
 H 0.64169 0.92424 -1.63295  
 H 0.08783 -1.53933 -1.63447  
 H -2.27799 -2.28240 -1.91935

**B**

SCF (BP86) Energy = -1263.64592625  
 Enthalpy 0K = -1263.279761  
 Enthalpy 298K = -1263.251863  
 Free Energy 298K = -1263.338799  
 Lowest Frequency = 28.1817 cm<sup>-1</sup>  
 Second Frequency = 34.0115 cm<sup>-1</sup>  
 SCF (BP86-D3BJ) Energy = -1263.76603215  
 SCF (MeCN) Energy = -1263.66375545  
 SCF (Toluene) Energy = -1263.65386872  
 SCF (BS2) Energy = -1263.66950286

C -0.70198 -2.16360 1.92181  
 Ru -0.66456 -0.35118 -0.46770  
 C -1.07950 0.11547 -2.60737  
 C -1.99360 -0.87897 -2.13138  
 C -0.11568 -2.28331 -1.35706  
 C 0.82404 -1.31783 -1.83587  
 H -1.45852 1.06613 -2.98583  
 H -3.06123 -0.64779 -2.14376  
 H 0.22397 -3.14071 -0.77257  
 H 1.89369 -1.44694 -1.66016  
 C -0.55159 -2.27819 3.44325  
 H -0.54699 -3.33702 3.74069  
 H 0.35741 -1.77320 3.80634  
 H -1.41630 -1.78424 3.91909  
 O -0.24440 -1.00721 1.46686  
 O -1.22069 -3.07445 1.25826  
 C 1.61869 1.65797 0.49498  
 C -0.54221 2.54942 0.29883  
 N 0.28796 1.47051 0.21492  
 O -2.33054 0.25335 0.64802  
 C -3.35271 0.92941 0.16474  
 O -3.40142 1.50389 -0.94164  
 C -4.53329 0.96650 1.14017  
 H -4.19460 1.25267 2.14874  
 H -5.29667 1.67115 0.78090  
 H -4.97475 -0.04133 1.22163  
 C 2.64040 0.58788 0.27365  
 C 3.67156 0.84976 -0.65772  
 C 2.67019 -0.61587 1.00885  
 C 4.69224 -0.08859 -0.87838  
 H 3.66265 1.79054 -1.21978  
 C 3.70137 -1.54347 0.79563  
 H 1.86110 -0.82245 1.71377  
 C 4.70979 -1.28898 -0.14985  
 H 5.47463 0.12235 -1.61486  
 H 3.71564 -2.47314 1.37431  
 H 5.50873 -2.01970 -0.31383  
 C -0.11829 3.81610 0.71007  
 C 2.09192 2.91540 0.92762  
 C 1.22464 4.00410 1.05512  
 H 3.15499 3.01028 1.16431  
 H 1.59393 4.97556 1.39854  
 H -0.84539 4.63162 0.74942  
 H -1.57014 2.38013 -0.02757  
 C -1.52744 -2.09092 -1.52653  
 H -2.21968 -2.79072 -1.05763  
 C 0.32301 -0.10341 -2.41426  
 H 1.02938 0.69706 -2.65754

**TS (B-C)**

SCF (BP86) Energy = -1263.59805874  
 Enthalpy 0K = -1263.234743  
 Enthalpy 298K = -1263.207363  
 Free Energy 298K = -1263.293555  
 Lowest Frequency = -86.5861 cm<sup>-1</sup>  
 Second Frequency = 23.6734 cm<sup>-1</sup>  
 SCF (BP86-D3BJ) Energy = -1263.71826892  
 SCF (MeCN) Energy = -1263.62573482  
 SCF (Toluene) Energy = -1263.61056740  
 SCF (BS2) Energy = -1263.62251906

C -3.63878 -0.24066 -1.12482  
 Ru 0.07863 -0.48231 0.64200  
 C 0.72938 -1.44397 2.47749  
 C -0.22640 -2.29404 1.83782  
 C -1.85136 -0.42478 1.74875  
 C -0.90610 0.41728 2.44530  
 H 1.73925 -1.81673 2.67077  
 H 0.09337 -3.28146 1.50028  
 H -2.76575 -0.00279 1.26393  
 H -1.13611 1.47634 2.58774

## XYZ Coordinates and Computed Energies

C -4.72810 -0.84764 -2.03461  
H -4.46677 -1.88536 -2.30205  
H -5.71713 -0.82024 -1.55241  
H -4.77395 -0.27827 -2.97962  
O -2.43195 -0.36876 -1.51498  
O -4.03596 0.35849 -0.06171  
C 1.98426 1.52964 -0.55319  
C 4.25899 -0.07240 -0.57634  
C 3.03908 -0.52624 -0.06727  
H 2.89153 -1.55194 0.28484  
N 1.93412 0.26314 -0.03313  
O 0.31038 -1.53802 -1.12362  
C 0.93319 -2.69754 -1.20655  
O 1.56725 -3.26179 -0.29209  
C 0.78408 -3.32496 -2.59216  
H 0.87308 -2.56255 -3.38082  
H 1.53471 -4.11646 -2.72808  
H -0.22434 -3.76408 -2.67856  
H 5.12234 -0.74263 -0.57520  
C 0.73565 2.30157 -0.48175  
C 0.76578 3.70726 -0.34787  
C -0.51670 1.62308 -0.43351  
C -0.41886 4.43069 -0.15942  
H 1.72742 4.23133 -0.34616  
C -1.70412 2.36011 -0.22599  
H -0.76497 0.59560 -0.88726  
C -1.65021 3.75434 -0.08550  
H -0.37729 5.51967 -0.05170  
H -2.65992 1.80550 -0.18926  
H -2.57620 4.31792 0.07107  
C 3.18709 2.02499 -1.09670  
C 4.33502 1.22822 -1.09869  
H 5.27033 1.60794 -1.52137  
H 3.19780 3.02544 -1.53653  
C -1.52243 -1.77958 1.47657  
H -2.19806 -2.37584 0.85970  
C 0.37852 -0.07752 2.79553  
H 1.12643 0.59176 3.23112

**C**

SCF (BP86) Energy = -1263.66809038  
Enthalpy 0K = -1263.302391  
Enthalpy 298K = -1263.274400  
Free Energy 298K = -1263.361925  
Lowest Frequency = 23.7692 cm<sup>-1</sup>  
Second Frequency = 26.8672 cm<sup>-1</sup>  
SCF (BP86-D3BJ) Energy = -1263.78697393  
SCF (MeCN) Energy = -1263.68201499  
SCF (Toluene) Energy = -1263.67428098  
SCF (BS2) Energy = -1263.68923639

C 3.91368 0.23167 0.77064  
Ru -0.25241 -0.62654 -0.67274  
C -1.10035 -2.55583 -1.68266  
C 0.13337 -2.90782 -1.10830  
C 1.24148 -0.99437 -2.27530  
C -0.02863 -0.62411 -2.84797  
H -2.00320 -3.12211 -1.43536  
H 0.18915 -3.72076 -0.38223  
H 2.13914 -0.39817 -2.44782  
H -0.11066 0.26579 -3.47771  
C 5.25584 0.81882 1.17759  
H 6.01224 0.58568 0.41668  
H 5.16700 1.91159 1.29576  
H 5.56669 0.41358 2.15462  
O 2.96902 0.47088 1.69296  
O 3.73208 -0.38181 -0.28458  
C -4.14668 -0.38660 1.30416  
C -2.95250 -0.83569 0.73629  
H -2.68525 -1.89288 0.69688  
N -2.01942 0.01551 0.23953  
O 0.60026 -0.60063 1.27746

## Ru(II) Carboxylate Structures (Figure 5)

C 0.21046 -1.52637 2.15256  
O -0.60752 -2.42692 1.91566  
C 0.84058 -1.35588 3.53492  
H 0.27141 -0.59255 4.09367  
H 0.78360 -2.30530 4.08609  
H 1.88286 -1.00764 3.47102  
H -4.86950 -1.11340 1.68345  
C -1.08200 2.16230 -0.14140  
C -1.03554 3.57486 -0.11436  
C 0.02815 1.39058 -0.60568  
C 0.11865 4.24462 -0.53043  
H -1.89802 4.15242 0.23841  
C 1.19327 2.09470 -0.98237  
H 2.06969 0.06536 1.41897  
C 1.23599 3.49882 -0.95222  
H 0.15669 5.33849 -0.51337  
H 2.08933 1.54071 -1.28060  
H 2.15237 4.01768 -1.25738  
C -2.21130 1.37556 0.34312  
C -4.37807 0.99794 1.38386  
C -3.40099 1.87667 0.91311  
H -5.30334 1.38484 1.82257  
H -3.54317 2.95787 0.98882  
C 1.29223 -2.07708 -1.35629  
H 2.22529 -2.24351 -0.81275  
C -1.19887 -1.37235 -2.51181  
H -2.17354 -1.05357 -2.89256

**B'**

SCF (BP86) Energy = -1031.40787653  
Enthalpy 0K = -1031.141235  
Enthalpy 298K = -1031.119573  
Free Energy 298K = -1031.191217  
Lowest Frequency = 35.8311 cm<sup>-1</sup>  
Second Frequency = 58.8947 cm<sup>-1</sup>  
SCF (BP86-D3BJ) Energy = -1031.48880480  
SCF (MeCN) Energy = -1031.42375148  
SCF (Toluene) Energy = -1031.41487867  
SCF (BS2) Energy = -1031.36802683

C -2.71121 -0.43588 -1.03110  
Ru -0.37956 -0.32950 -0.11546  
C -4.08873 -0.65733 -1.60325  
H -4.84834 -0.19809 -0.95350  
H -4.15342 -0.24901 -2.62272  
H -4.28862 -1.74180 -1.65353  
O -1.67699 -0.38276 -1.81009  
O -2.51674 -0.33065 0.23303  
C 1.96413 0.91396 -0.27000  
C 2.41518 -1.16519 -1.30036  
N 1.53682 -0.30390 -0.73354  
O -0.45802 -2.42798 0.24114  
C 0.02091 -2.25497 1.42784  
O 0.33403 -1.05143 1.76869  
C 0.16390 -3.40462 2.38891  
H 0.35857 -4.33891 1.84142  
H 0.97077 -3.20371 3.10899  
H -0.77904 -3.52569 2.95025  
C 0.75023 1.60225 0.25738  
C 0.70826 2.23014 1.55008  
C -0.33094 1.83766 -0.68891  
C -0.38792 2.98530 1.92312  
H 1.54578 2.07713 2.23810  
C -1.42992 2.66016 -0.25708  
H -0.14861 1.73978 -1.76552  
C -1.47480 3.19103 1.01877  
H -0.42146 3.43906 2.91916  
H -2.22489 2.88628 -0.97590  
H -2.32719 3.80332 1.33007  
C 3.77377 -0.82973 -1.40229  
C 3.30372 1.29482 -0.32252  
C 4.22823 0.40005 -0.90133

## XYZ Coordinates and Computed Energies

H 3.61262 2.26681 0.07258  
 H 5.28792 0.66499 -0.96294  
 H 4.46597 -1.53998 -1.86339  
 H 2.00577 -2.11816 -1.64562

## TS (B'-C')

SCF (BP86) Energy = -1031.37308205  
 Enthalpy 0K = -1031.107767  
 Enthalpy 298K = -1031.086471  
 Free Energy 298K = -1031.159065  
 Lowest Frequency = -64.5937 cm<sup>-1</sup>  
 Second Frequency = 11.4914 cm<sup>-1</sup>  
 SCF (BP86-D3BJ) Energy = -1031.45281755  
 SCF (MeCN) Energy = -1031.39332066  
 SCF (Toluene) Energy = -1031.38220072  
 SCF (BS2) Energy = -1031.33529765

C -3.01850 0.67584 -0.55252  
 Ru -0.38980 -0.32167 0.01316  
 C -4.48273 0.99259 -0.25078  
 H -5.05316 1.06909 -1.18777  
 H -4.92561 0.22789 0.40606  
 H -4.54724 1.96025 0.27757  
 O -2.51430 0.93237 -1.66986  
 O -2.35727 0.16504 0.45804  
 C 2.35840 0.33274 -0.12604  
 C 3.54441 -2.10320 -0.67492  
 C 2.15418 -1.96460 -0.61193  
 H 1.47157 -2.80024 -0.78634  
 N 1.56312 -0.77408 -0.32295  
 O -1.12205 -2.16447 -0.61001  
 C -1.13921 -2.58834 0.61171  
 O -0.64940 -1.76212 1.47632  
 C -1.70613 -3.92085 0.99718  
 H -1.17689 -4.32031 1.87539  
 H -2.77017 -3.79602 1.26287  
 H -1.63949 -4.62272 0.15264  
 H 3.97493 -3.08134 -0.90704  
 C 1.55261 1.54687 0.10914  
 C 1.97271 2.59545 0.96096  
 C 0.28422 1.66423 -0.56913  
 C 1.18627 3.74030 1.11492  
 H 2.91195 2.49225 1.51465  
 C -0.48258 2.85213 -0.42201  
 H 0.04883 1.02177 -1.47958  
 C -0.04176 3.86813 0.42576  
 H 1.52162 4.54046 1.78271  
 H -1.42184 2.91909 -0.97770  
 H -0.64847 4.76954 0.55885  
 C 3.75590 0.25206 -0.16811  
 C 4.36256 -0.98584 -0.43825  
 H 5.45216 -1.07282 -0.47729  
 H 4.35334 1.15366 -0.00526

## C'

SCF (BP86) Energy = -1031.36947647  
 Enthalpy 0K = -1031.103291  
 Enthalpy 298K = -1031.080737  
 Free Energy 298K = -1031.158098  
 Lowest Frequency = 12.1067 cm<sup>-1</sup>  
 Second Frequency = 23.0969 cm<sup>-1</sup>  
 SCF (BP86-D3BJ) Energy = -1031.44848936  
 SCF (MeCN) Energy = -1031.39104658  
 SCF (Toluene) Energy = -1031.37844569  
 SCF (BS2) Energy = -1031.33217274

C 2.84591 -1.11596 -2.19038  
 Ru -0.18920 1.11335 1.01187  
 C 2.86279 -2.11458 -3.33204  
 H 3.81512 -2.66035 -3.33209  
 H 2.02684 -2.82459 -3.21705  
 H 2.71979 -1.59751 -4.29476

## Ru(II) Carboxylate Structures (Figure 5)

O 1.73100 -0.35235 -2.21485  
 O 3.73394 -1.01655 -1.34547  
 C -3.05799 1.88151 -2.14104  
 C -2.00920 2.00901 -1.22748  
 H -1.42866 2.93300 -1.14011  
 N -1.63906 1.00625 -0.38551  
 O 1.52961 1.33831 -0.05065  
 C 2.30741 1.31644 1.02251  
 O 1.69748 1.19728 2.13157  
 C 3.79071 1.40387 0.85937  
 H 4.05970 2.34919 0.35811  
 H 4.28267 1.34676 1.83989  
 H 4.11089 0.57404 0.20202  
 H -3.31079 2.72315 -2.79122  
 C -1.74685 -1.21259 0.44966  
 C -2.25127 -2.51753 0.62660  
 C -0.56990 -0.78519 1.15983  
 C -1.58906 -3.41841 1.47066  
 H -3.16300 -2.83390 0.10591  
 C 0.09451 -1.72125 1.98943  
 H 1.74720 0.25840 -1.42254  
 C -0.41713 -3.01882 2.14570  
 H -1.98177 -4.43135 1.60418  
 H 1.00147 -1.41873 2.52344  
 H 0.09816 -3.72731 2.80443  
 C -2.31279 -0.20809 -0.45152  
 C -3.76646 0.66877 -2.19536  
 C -3.38247 -0.37666 -1.34586  
 H -4.59894 0.53798 -2.89308  
 H -3.90582 -1.33654 -1.37605

## C' (without HOAc)

SCF (BP86) Energy = -802.265265896  
 Enthalpy 0K = -802.060614  
 Enthalpy 298K = -802.044223  
 Free Energy 298K = -802.104940  
 Lowest Frequency = 33.6601 cm<sup>-1</sup>  
 Second Frequency = 44.0195 cm<sup>-1</sup>  
 SCF (BP86-D3BJ) Energy = -802.330766802  
 SCF (MeCN) Energy = -802.284698570  
 SCF (Toluene) Energy = -802.273223401  
 SCF (BS2) Energy = -802.155279837

Ru 0.75517 -0.50025 -0.60981  
 C -2.85794 -2.73856 0.22009  
 C -1.53469 -2.39269 -0.06329  
 H -0.76614 -3.15053 -0.24592  
 N -1.10869 -1.10208 -0.13789  
 O 1.90389 -1.18140 0.91677  
 C 3.00253 -0.65249 0.43747  
 O 2.89223 -0.00775 -0.65962  
 C 4.29237 -0.78436 1.19771  
 H 4.31699 -1.73330 1.75404  
 H 5.14494 -0.71850 0.50625  
 H 4.37114 0.04093 1.92722  
 H -3.14070 -3.79372 0.26370  
 C -1.39932 1.24305 0.07997  
 C -2.08414 2.46356 0.25424  
 C 0.02769 1.22927 -0.11177  
 C -1.37454 3.67122 0.27449  
 H -3.17415 2.47439 0.37423  
 C 0.72449 2.46189 -0.06490  
 C 0.02724 3.66587 0.11848  
 H -1.90880 4.61671 0.41163  
 H 1.81201 2.46876 -0.19518  
 H 0.57825 4.61346 0.13389  
 C -2.02170 -0.08105 0.10606  
 C -3.79611 -1.71431 0.43638  
 C -3.36541 -0.38230 0.38149  
 H -4.84273 -1.94986 0.65106  
 H -4.06908 0.43585 0.56004

## XYZ Coordinates and Computed Energies

## Ru(II) Carboxylate Structures (Figure 6)

**D<sup>+</sup>** ( $\kappa^1$ )

SCF (BP86) Energy = -1282.03894895  
 Enthalpy 0K = -1281.656984  
 Enthalpy 298K = -1281.630229  
 Free Energy 298K = -1281.713656  
 Lowest Frequency = 29.3841  $\text{cm}^{-1}$   
 Second Frequency = 36.3951  $\text{cm}^{-1}$   
 SCF (BP86-D3BJ) Energy = -1282.16898642  
 SCF (MeCN) Energy = -1282.10115295  
 SCF (Toluene) Energy = -1282.07357931  
 SCF (BS2) Energy = -1282.03733615

|    |          |          |          |
|----|----------|----------|----------|
| Ru | 0.09253  | -0.09352 | -0.19539 |
| O  | 0.43432  | -1.67319 | 2.37151  |
| C  | -0.38260 | -0.75653 | 2.55087  |
| C  | -1.09612 | -0.53950 | 3.87541  |
| O  | -0.74945 | 0.13094  | 1.62178  |
| H  | -1.87700 | -1.31088 | 3.98358  |
| H  | -0.37643 | -0.67570 | 4.69665  |
| H  | -1.56702 | 0.45159  | 3.93731  |
| C  | -2.91313 | -0.23821 | -0.52291 |
| C  | -4.20733 | -0.55597 | -0.06671 |
| C  | -1.92120 | -1.25767 | -0.53412 |
| C  | -4.50891 | -1.85900 | 0.35732  |
| H  | -4.97341 | 0.22288  | -0.00169 |
| C  | -2.22871 | -2.56237 | -0.11125 |
| C  | -3.52326 | -2.86114 | 0.34162  |
| H  | -5.51748 | -2.09056 | 0.71249  |
| H  | -1.46340 | -3.34294 | -0.14235 |
| H  | -3.76464 | -3.87489 | 0.67451  |
| H  | -1.00885 | -1.17015 | -1.23516 |
| C  | -2.51693 | 1.12102  | -0.91881 |
| C  | -2.94542 | 3.35157  | -1.79164 |
| H  | -3.64008 | 4.10861  | -2.16632 |
| C  | -3.41447 | 2.09654  | -1.39331 |
| H  | -4.47611 | 1.84923  | -1.47167 |
| C  | -0.71630 | 2.61817  | -1.24124 |
| H  | 0.36261  | 2.77374  | -1.16490 |
| C  | -1.56698 | 3.61395  | -1.72214 |
| H  | -1.14945 | 4.57391  | -2.03577 |
| N  | -1.16875 | 1.39935  | -0.83703 |
| C  | 2.86964  | -0.68416 | -0.62246 |
| C  | 3.88387  | -1.08549 | -1.51184 |
| C  | 1.70386  | -1.51256 | -0.45040 |
| C  | 3.78062  | -2.30579 | -2.19594 |
| H  | 4.74617  | -0.43464 | -1.68900 |
| C  | 1.64213  | -2.75895 | -1.12436 |
| C  | 2.66299  | -3.14096 | -2.00351 |
| H  | 4.57604  | -2.60903 | -2.88307 |
| H  | 0.79766  | -3.42964 | -0.93881 |
| H  | 2.59787  | -4.09676 | -2.53199 |
| H  | 1.11170  | -1.47401 | 0.58361  |
| C  | 2.89762  | 0.58038  | 0.12945  |
| C  | 3.92245  | 2.44354  | 1.29415  |
| H  | 4.81221  | 2.99920  | 1.60361  |
| C  | 4.04879  | 1.29049  | 0.50938  |
| H  | 5.03270  | 0.91865  | 0.21218  |
| C  | 1.52739  | 2.12957  | 1.28401  |
| H  | 0.50671  | 2.39328  | 1.57121  |
| C  | 2.64330  | 2.86138  | 1.69891  |
| H  | 2.50487  | 3.74056  | 2.33309  |
| N  | 1.64979  | 1.02933  | 0.49710  |

**TS (D<sup>+</sup>-E<sup>+</sup>)** ( $\kappa^1$ )

SCF (BP86) Energy = -1282.03427438  
 Enthalpy 0K = -1281.656041  
 Enthalpy 298K = -1281.629732  
 Free Energy 298K = -1281.711410  
 Lowest Frequency = -890.9595  $\text{cm}^{-1}$   
 Second Frequency = 33.0578  $\text{cm}^{-1}$   
 SCF (BP86-D3BJ) Energy = -1282.16481909  
 SCF (MeCN) Energy = -1282.09444711

SCF (Toluene) Energy = -1282.06804171  
 SCF (BS2) Energy = -1282.03076453

|    |          |          |          |
|----|----------|----------|----------|
| Ru | 0.07521  | -0.02339 | -0.24294 |
| O  | 0.86069  | -1.81485 | 1.96941  |
| C  | -0.03657 | -1.02648 | 2.40651  |
| C  | -0.51266 | -1.12958 | 3.83314  |
| O  | -0.59485 | -0.10493 | 1.67118  |
| H  | -1.00119 | -2.10753 | 3.97580  |
| H  | 0.35581  | -1.09572 | 4.50969  |
| H  | -1.21922 | -0.32574 | 4.07805  |
| C  | -2.96157 | -0.31961 | -0.40755 |
| C  | -4.19971 | -0.74891 | 0.10998  |
| C  | -1.91577 | -1.27269 | -0.55840 |
| C  | -4.39993 | -2.09406 | 0.45515  |
| H  | -5.00108 | -0.02349 | 0.28149  |
| C  | -2.12469 | -2.62114 | -0.21817 |
| C  | -3.36503 | -3.03109 | 0.29561  |
| H  | -5.36685 | -2.40990 | 0.85808  |
| H  | -1.32514 | -3.35259 | -0.36639 |
| H  | -3.52660 | -4.08013 | 0.56082  |
| H  | -1.05005 | -1.08222 | -1.29321 |
| C  | -2.68715 | 1.09061  | -0.73240 |
| C  | -3.33265 | 3.32345  | -1.44582 |
| H  | -4.10066 | 4.04109  | -1.74826 |
| C  | -3.68272 | 2.01135  | -1.11193 |
| H  | -4.72308 | 1.68159  | -1.17083 |
| C  | -1.03314 | 2.74270  | -1.02094 |
| H  | 0.03227  | 2.98504  | -0.97386 |
| C  | -1.97874 | 3.69486  | -1.40693 |
| H  | -1.65375 | 4.70389  | -1.67276 |
| N  | -1.36525 | 1.46923  | -0.67866 |
| C  | 2.86046  | -0.53576 | -0.71436 |
| C  | 3.93662  | -0.97931 | -1.50643 |
| C  | 1.64695  | -1.31378 | -0.61447 |
| C  | 3.85622  | -2.20862 | -2.17542 |
| H  | 4.83253  | -0.35977 | -1.61990 |
| C  | 1.61850  | -2.56821 | -1.28082 |
| C  | 2.69918  | -3.00244 | -2.06086 |
| H  | 4.69667  | -2.55056 | -2.78656 |
| H  | 0.73935  | -3.21372 | -1.18053 |
| H  | 2.64490  | -3.96538 | -2.57846 |
| H  | 1.05330  | -1.43640 | 0.70044  |
| C  | 2.86850  | 0.72515  | 0.03747  |
| C  | 3.85063  | 2.61515  | 1.20326  |
| H  | 4.72697  | 3.20037  | 1.49633  |
| C  | 3.99927  | 1.47781  | 0.40115  |
| H  | 4.98970  | 1.15156  | 0.07398  |
| C  | 1.47131  | 2.21422  | 1.24294  |
| H  | 0.44879  | 2.44594  | 1.55160  |
| C  | 2.56760  | 2.98104  | 1.64545  |
| H  | 2.41154  | 3.84609  | 2.29468  |
| N  | 1.61246  | 1.12888  | 0.43830  |

**E<sup>+</sup>** ( $\kappa^1$ )

SCF (BP86) Energy = -1282.03838938  
 Enthalpy 0K = -1281.656057  
 Enthalpy 298K = -1281.629390  
 Free Energy 298K = -1281.712200  
 Lowest Frequency = 31.1643  $\text{cm}^{-1}$   
 Second Frequency = 35.4231  $\text{cm}^{-1}$   
 SCF (BP86-D3BJ) Energy = -1282.16847171  
 SCF (MeCN) Energy = -1282.09698916  
 SCF (Toluene) Energy = -1282.07155918  
 SCF (BS2) Energy = -1282.03431484

|    |          |          |          |
|----|----------|----------|----------|
| Ru | 0.10213  | -0.02252 | -0.24892 |
| O  | 0.80292  | -1.80572 | 2.09943  |
| C  | -0.11706 | -0.95552 | 2.47060  |
| C  | -0.60300 | -1.03172 | 3.88572  |
| O  | -0.60255 | -0.08325 | 1.67509  |
| H  | -1.05862 | -2.02066 | 4.05985  |

## XYZ Coordinates and Computed Energies

H 0.25230 -0.94129 4.57491  
H -1.33836 -0.24200 4.08470  
C -2.95515 -0.34335 -0.42630  
C -4.18764 -0.79328 0.08812  
C -1.89445 -1.28054 -0.57738  
C -4.36979 -2.14141 0.43164  
H -5.00009 -0.07949 0.25682  
C -2.08700 -2.63314 -0.24075  
C -3.32119 -3.06293 0.27184  
H -5.33317 -2.47173 0.83161  
H -1.27880 -3.35393 -0.39508  
H -3.46801 -4.11524 0.53296  
H -1.03019 -1.07515 -1.30700  
C -2.70781 1.07465 -0.74740  
C -3.39991 3.28892 -1.47076  
H -4.17985 3.98638 -1.78964  
C -3.72177 1.96663 -1.14783  
H -4.75116 1.60871 -1.23205  
C -1.09614 2.76640 -0.99663  
H -0.03827 3.03742 -0.92764  
C -2.05785 3.69644 -1.39901  
H -1.75495 4.71543 -1.65312  
N -1.39875 1.48403 -0.66600  
C 2.87807 -0.53704 -0.72879  
C 3.97296 -1.02109 -1.47149  
C 1.63807 -1.28009 -0.64719  
C 3.89073 -2.26676 -2.10820  
H 4.88732 -0.42560 -1.56786  
C 1.61195 -2.54948 -1.28901  
C 2.71178 -3.03129 -2.01382  
H 4.74461 -2.64408 -2.67868  
H 0.71062 -3.17043 -1.22889  
H 2.65348 -4.00579 -2.50960  
H 1.00513 -1.57761 1.08811  
C 2.89413 0.73177 0.00778  
C 3.87817 2.64540 1.13614  
H 4.75386 3.24287 1.40549  
C 4.02250 1.50173 0.34236  
H 5.00985 1.18642 -0.00437  
C 1.50412 2.22403 1.21855  
H 0.48375 2.45781 1.53376  
C 2.59954 3.00453 1.59649  
H 2.44563 3.87661 2.23679  
N 1.64000 1.12693 0.42845

**D<sup>+</sup>** ( $\kappa^2$ )

SCF (BP86) Energy = -1282.05904449  
Enthalpy 0K = -1281.675413  
Enthalpy 298K = -1281.648838  
Free Energy 298K = -1281.731036  
Lowest Frequency = 24.2476  $\text{cm}^{-1}$   
Second Frequency = 42.6875  $\text{cm}^{-1}$   
SCF (BP86-D3BJ) Energy = -1282.19464727  
SCF (MeCN) Energy = -1282.11432978  
SCF (Toluene) Energy = -1282.09121296  
SCF (BS2) Energy = -1282.05543093

Ru 0.29314 0.66968 0.00749  
O 1.18783 2.21322 1.19213  
C 1.21741 3.02292 0.18251  
C 1.71957 4.43153 0.32559  
O 0.76787 2.56814 -0.93938  
H 2.15987 4.78028 -0.62005  
H 0.87294 5.09638 0.57125  
H 2.45091 4.49713 1.14409  
C -2.49699 -0.00069 0.82367  
C -3.87420 -0.20093 0.60755  
C -1.85554 1.11707 0.20223  
C -4.60121 0.69710 -0.18917  
H -4.38026 -1.07015 1.03954  
C -2.59793 2.02780 -0.58388  
C -3.96845 1.80890 -0.78223

## Ru(II) Carboxylate Structures (Figure 6)

H -5.67021 0.52965 -0.35122  
H -2.09303 2.88952 -1.03025  
H -4.54889 2.50556 -1.39479  
H -0.98109 1.59582 0.82157  
C -1.64098 -0.86921 1.64159  
C -1.21634 -2.43491 3.45265  
H -1.58003 -3.11108 4.23134  
C -2.11624 -1.74676 2.63404  
H -3.19418 -1.85528 2.77908  
C 0.58382 -1.34768 2.26645  
H 1.64214 -1.14413 2.09033  
C 0.15962 -2.21205 3.27727  
H 0.90281 -2.69647 3.91574  
N -0.28205 -0.70516 1.43863  
C 1.95692 -1.14397 -0.91779  
C 2.68584 -2.08955 -0.15236  
C 2.42149 0.20953 -1.00995  
C 3.81961 -1.68781 0.55620  
H 2.34354 -3.12846 -0.11351  
C 3.56539 0.59339 -0.25258  
C 4.24361 -0.33644 0.53314  
H 4.38438 -2.42308 1.13835  
H 3.94029 1.61771 -0.33602  
H 5.13010 -0.03494 1.09877  
H 2.09824 0.84775 -1.83912  
C 0.76520 -1.52005 -1.71756  
C -0.51763 -2.76643 -3.33603  
H -0.61823 -3.59087 -4.04754  
C 0.67204 -2.59238 -2.61096  
H 1.52856 -3.25857 -2.74635  
C -1.41586 -0.81185 -2.22070  
H -2.21026 -0.08598 -2.03823  
C -1.56440 -1.85262 -3.14559  
H -2.49946 -1.93756 -3.70531  
N -0.27377 -0.65331 -1.50490

**TS (D<sup>+</sup>-E<sup>+</sup>)** ( $\kappa^2$ )

SCF (BP86) Energy = -1282.03247462  
Enthalpy 0K = -1281.653789  
Enthalpy 298K = -1281.627216  
Free Energy 298K = -1281.709781  
Lowest Frequency = -995.2539  $\text{cm}^{-1}$   
Second Frequency = 22.6898  $\text{cm}^{-1}$   
SCF (BP86-D3BJ) Energy = -1282.16646981  
SCF (MeCN) Energy = -1282.08697163  
SCF (Toluene) Energy = -1282.06426013  
SCF (BS2) Energy = -1282.02796959

Ru 0.00554 0.61643 -0.02447  
O 0.87964 2.38051 -1.30127  
C 0.51982 3.20024 -0.30894  
C 0.64584 4.67416 -0.53067  
O 0.07923 2.67666 0.75460  
H 0.31175 5.22713 0.35705  
H 1.69514 4.92327 -0.76189  
H 0.04712 4.97042 -1.40843  
C 2.52131 -0.81396 -0.53146  
C 3.85397 -1.23573 -0.35914  
C 2.03777 0.35183 0.15242  
C 4.71936 -0.51570 0.47767  
H 4.22193 -2.13571 -0.86283  
C 2.93022 1.05617 1.00054  
C 4.25933 0.62765 1.15564  
H 5.75294 -0.85033 0.60607  
H 2.57894 1.94197 1.54084  
H 4.93646 1.18437 1.81155  
H 1.47682 1.42206 -0.73992  
C 1.53387 -1.50402 -1.36584  
C 0.79128 -3.09411 -3.05133  
H 1.00439 -3.90904 -3.74883  
C 1.80905 -2.55602 -2.25851  
H 2.83096 -2.93490 -2.33926

## XYZ Coordinates and Computed Energies

C -0.73188 -1.52019 -2.03869  
H -1.72108 -1.07295 -1.91897  
C -0.50156 -2.55621 -2.94624  
H -1.32832 -2.92878 -3.55622  
N 0.24828 -1.00192 -1.25162  
C -2.64105 -0.24713 0.60563  
C -3.56957 -0.98879 -0.16148  
C -2.51685 1.15454 0.38876  
C -4.31790 -0.35770 -1.16349  
H -3.67855 -2.06371 0.01589  
C -3.25993 1.76965 -0.64491  
C -4.14396 1.01653 -1.42739  
H -5.03559 -0.93905 -1.75092  
H -3.17747 2.85048 -0.79620  
H -4.72593 1.49910 -2.21819  
H -2.00100 1.78072 1.12338  
C -1.79430 -0.89771 1.63532  
C -1.37715 -2.30596 3.56211  
H -1.73313 -2.97814 4.34773  
C -2.27169 -1.76320 2.62882  
H -3.34201 -1.98347 2.67001  
C 0.40641 -1.09872 2.45743  
H 1.45159 -0.80771 2.34330  
C -0.02108 -1.95691 3.47425  
H 0.71390 -2.34462 4.18435  
N -0.45989 -0.57862 1.54428

**E<sup>+</sup>** ( $\kappa^2$ )

SCF (BP86) Energy = -1282.04711192  
Enthalpy 0K = -1281.663206  
Enthalpy 298K = -1281.636011  
Free Energy 298K = -1281.720797  
Lowest Frequency = 26.6433  $\text{cm}^{-1}$   
Second Frequency = 31.9963  $\text{cm}^{-1}$   
SCF (BP86-D3BJ) Energy = -1282.18394412  
SCF (MeCN) Energy = -1282.10889181  
SCF (Toluene) Energy = -1282.08099710  
SCF (BS2) Energy = -1282.04337397

Ru -0.22933 -0.27729 -0.42564  
O -2.38417 -2.16086 -2.12950  
C -1.36485 -2.86282 -1.62823  
C -1.29782 -4.28588 -2.09328  
O -0.52219 -2.37038 -0.83576  
H -0.40458 -4.77621 -1.68690  
H -2.20465 -4.82587 -1.77290  
H -1.28029 -4.31601 -3.19557  
C -2.38727 1.55498 0.13447  
C -3.70057 2.01229 0.36328  
C -2.07836 0.15288 0.16949  
C -4.72241 1.10292 0.67200  
H -3.93390 3.08134 0.31555  
C -3.12410 -0.73599 0.53237  
C -4.43023 -0.26777 0.77170  
H -5.73913 1.46410 0.85116  
H -2.92209 -1.80908 0.64165  
H -5.22015 -0.97827 1.03736  
H -2.45034 -1.30311 -1.62767  
C -1.23456 2.43732 -0.08112  
C -0.08743 4.57485 -0.26128  
H -0.11268 5.66824 -0.27803  
C -1.26856 3.84232 -0.10360  
H -2.22607 4.35720 0.00651  
C 1.10967 2.48450 -0.38018  
H 2.02762 1.90692 -0.49477  
C 1.12497 3.88131 -0.39472  
H 2.07602 4.40580 -0.51495  
N -0.03407 1.76171 -0.23643  
C 2.80587 -0.42690 0.21297  
C 4.05206 0.22276 0.36746  
C 2.30965 -0.63006 -1.09879  
C 4.77933 0.64499 -0.75504

## Ru(II) Carboxylate Structures (Figure 6)

H 4.43663 0.43356 1.37019  
C 3.03758 -0.20123 -2.22177  
C 4.27577 0.43728 -2.05193  
H 5.74097 1.14833 -0.61573  
H 2.64315 -0.38421 -3.22608  
H 4.84895 0.76683 -2.92360  
H 1.42490 -1.27933 -1.26618  
C 2.01309 -0.83826 1.39145  
C 1.85329 -1.63730 3.69110  
H 2.33143 -1.96585 4.61787  
C 2.62359 -1.25532 2.58967  
H 3.71486 -1.30103 2.62907  
C -0.11473 -1.18866 2.36728  
H -1.19445 -1.13179 2.23078  
C 0.45577 -1.60115 3.57056  
H -0.20012 -1.88869 4.39624  
N 0.63502 -0.80811 1.28974

**D**

SCF (BP86) Energy = -1510.76736972  
Enthalpy 0K = -1510.336047  
Enthalpy 298K = -1510.303881  
Free Energy 298K = -1510.399816  
Lowest Frequency = 23.7201  $\text{cm}^{-1}$   
Second Frequency = 32.4862  $\text{cm}^{-1}$   
SCF (BP86-D3BJ) Energy = -1510.92042404  
SCF (MeCN) Energy = -1510.78690618  
SCF (Toluene) Energy = -1510.77585526  
SCF (BS2) Energy = -1510.84332074

Ru 0.91517 -0.03275 -0.45023  
O 2.13513 1.03385 -1.89904  
C 1.59032 0.37074 -2.85606  
C 2.08710 0.49742 -4.27503  
O 0.62742 -0.43754 -2.56589  
H 1.26539 0.33234 -4.98789  
H 2.54627 1.48383 -4.43617  
H 2.85505 -0.27508 -4.45362  
C -2.60168 0.23686 -0.77240  
C -3.64932 -0.05912 0.12745  
C -2.38046 -0.61868 -1.87386  
C -4.45253 -1.19375 -0.06114  
H -3.82326 0.59957 0.98530  
C -3.19761 -1.74241 -2.06664  
C -4.23416 -2.03424 -1.16458  
H -5.25279 -1.41705 0.65221  
H -3.02350 -2.39147 -2.93155  
H -4.86993 -2.91221 -1.32078  
H -1.56583 -0.40020 -2.56980  
C -1.86166 1.52525 -0.64705  
C -2.01198 3.96471 -0.59168  
H -2.60959 4.88103 -0.55810  
C -2.62809 2.71037 -0.59641  
H -3.71757 2.61906 -0.59751  
C 0.09625 2.80783 -0.68519  
H 1.18567 2.79432 -0.73486  
C -0.61387 4.00953 -0.66305  
H -0.06673 4.95577 -0.69213  
N -0.48993 1.57541 -0.64672  
C 0.14154 0.26078 2.41833  
C -0.21118 0.93756 3.60208  
C 1.11648 0.81956 1.52795  
C 0.41232 2.14765 3.93765  
H -0.99137 0.53086 4.25572  
C 1.75621 2.02481 1.90780  
C 1.40188 2.68528 3.09246  
H 0.13298 2.66832 4.85927  
H 2.55977 2.41966 1.27691  
H 1.90518 3.61903 3.36663  
H 1.94198 0.05441 1.00815  
C -0.44128 -1.01053 1.98821  
C -1.56337 -3.14478 2.29801

## XYZ Coordinates and Computed Energies

```

H -2.09823 -3.85653 2.93414
C -1.13632 -1.91596 2.81066
H -1.30843 -1.65782 3.85943
C -0.58729 -2.52084 0.17798
H -0.33265 -2.70386 -0.86824
C -1.27016 -3.45466 0.95835
H -1.56445 -4.40984 0.51535
N -0.19647 -1.31066 0.66108
O 2.28036 -1.57337 -0.64656
C 3.27322 -1.67524 0.20472
C 4.27641 -2.77614 -0.12822
O 3.44209 -0.94271 1.20547
H 3.84712 -3.52260 -0.81205
H 5.15638 -2.31974 -0.61370
H 4.62130 -3.25787 0.79929

```

## TS (D-E)

```

SCF (BP86) Energy = -1510.73262187
Enthalpy 0K = -1510.305297
Enthalpy 298K = -1510.272928
Free Energy 298K = -1510.369216
Lowest Frequency = -1053.6258 cm-1
Second Frequency = 27.1991 cm-1
SCF (BP86-D3BJ) Energy = -1510.88592214
SCF (MeCN) Energy = -1510.75027871
SCF (Toluene) Energy = -1510.74035627
SCF (BS2) Energy = -1510.80850232

```

```

Ru -0.67874 -0.39619 -0.58591
O -1.41339 -2.14641 -1.60745
C -0.67409 -1.92356 -2.64051
C -0.81795 -2.78504 -3.87475
O 0.15246 -0.94087 -2.61094
H 0.13226 -2.82933 -4.42730
H -1.15386 -3.79670 -3.60278
H -1.57962 -2.33844 -4.53737
C 2.79465 -0.33263 0.09351
C 3.60805 0.49877 0.89517
C 2.88149 -0.22849 -1.31273
C 4.48050 1.42548 0.30599
H 3.53982 0.42772 1.98610
C 3.76710 0.68981 -1.89633
C 4.56783 1.51888 -1.09262
H 5.09477 2.07238 0.94107
H 3.83281 0.75327 -2.98777
H 5.25868 2.23269 -1.55384
H 2.24647 -0.85921 -1.94151
C 1.99103 -1.41452 0.72636
C 2.01901 -3.39758 2.16090
H 2.54363 -4.06459 2.85169
C 2.65798 -2.27824 1.62258
H 3.70642 -2.06738 1.84987
C 0.07681 -2.76251 0.88581
H -0.94794 -2.92100 0.55017
C 0.70218 -3.65516 1.75455
H 0.14991 -4.53134 2.10504
N 0.67012 -1.62667 0.39984
C -1.21459 0.79936 2.06467
C -1.63771 0.88273 3.40433
C -1.73042 -0.21958 1.19537
C -2.60141 -0.01197 3.89549
H -1.21618 1.64025 4.07528
C -2.71795 -1.09238 1.71415
C -3.14938 -0.99118 3.04775
H -2.92970 0.05981 4.93759
H -3.15619 -1.85146 1.05454
H -3.91329 -1.67839 3.42885
H -2.23766 0.24585 -0.12469
C -0.26332 1.71809 1.43109
C 1.02381 3.77085 1.23161
H 1.39549 4.70703 1.65938
C 0.22036 2.91387 1.99010

```

## Ru(II) Carboxylate Structures (Figure 6)

```

H -0.06548 3.18023 3.01154
C 0.83374 2.20822 -0.59606
H 1.04698 1.87696 -1.61489
C 1.31961 3.41685 -0.09478
H 1.92207 4.06127 -0.73995
N 0.08456 1.35269 0.14458
O -2.50483 0.54486 -1.41150
C -2.73764 1.87509 -1.53832
C -3.51572 2.17356 -2.81485
O -2.39463 2.73411 -0.73259
H -2.90661 1.89817 -3.69230
H -4.43333 1.56448 -2.85268
H -3.76832 3.24205 -2.85810

```

## E

```

SCF (BP86) Energy = -1510.75701342
Enthalpy 0K = -1510.324023
Enthalpy 298K = -1510.291288
Free Energy 298K = -1510.389520
Lowest Frequency = 19.9446 cm-1
Second Frequency = 23.3709 cm-1
SCF (BP86-D3BJ) Energy = -1510.90941903
SCF (MeCN) Energy = -1510.77098542
SCF (Toluene) Energy = -1510.76331717
SCF (BS2) Energy = -1510.83394144

```

```

Ru 0.59777 0.44011 0.22597
O 1.45701 1.64602 1.76321
C 0.71123 2.69429 1.62086
C 0.92855 3.87842 2.54440
O -0.19851 2.71898 0.72631
H 0.06781 3.97020 3.22889
H 1.84715 3.75638 3.13582
H 0.97855 4.80989 1.95799
C -2.79359 -0.22256 0.55325
C -3.68928 -1.08431 -0.11723
C -2.86315 1.16736 0.30628
C -4.62409 -0.57325 -1.03049
H -3.63545 -2.16299 0.06555
C -3.81014 1.67444 -0.59734
C -4.69029 0.80884 -1.27052
H -5.30199 -1.25650 -1.55285
H -3.86212 2.75470 -0.77065
H -5.42777 1.21028 -1.97381
H -2.16982 1.84465 0.81451
C -1.90405 -0.75880 1.61964
C -1.76329 -1.97441 3.73923
H -2.23081 -2.57834 4.52261
C -2.49795 -1.54043 2.63223
H -3.56522 -1.76184 2.54519
C 0.12801 -0.81888 2.79083
H 1.16923 -0.50060 2.81685
C -0.42243 -1.57382 3.82460
H 0.20770 -1.84401 4.67657
N -0.56178 -0.44151 1.66583
C 1.58974 -2.12495 -0.77327
C 2.41400 -3.26538 -0.87125
C 1.82673 -1.11345 0.21661
C 3.50536 -3.42011 -0.00526
H 2.21469 -4.03445 -1.62774
C 2.95658 -1.28724 1.05599
C 3.78133 -2.42169 0.94823
H 4.14520 -4.30526 -0.08067
H 3.19443 -0.51865 1.80340
H 4.64668 -2.52985 1.61341
H 2.96919 1.04919 -0.93293
C 0.48555 -1.81437 -1.68129
C -0.90538 -2.10731 -3.66041
H -1.20065 -2.69050 -4.53828
C 0.10022 -2.56944 -2.80506
H 0.61405 -3.51247 -3.01274
C -1.11742 -0.17594 -2.22933

```

## XYZ Coordinates and Computed Energies

H -1.59254 0.76582 -1.94414  
 C -1.51550 -0.87531 -3.37167  
 H -2.30218 -0.45960 -4.00681  
 N -0.15086 -0.61700 -1.37953  
 O 2.06438 1.38200 -1.13193  
 C 2.19489 2.53139 -1.92437  
 C 0.86132 3.12814 -2.27136  
 O 3.30312 2.91435 -2.24436  
 H 0.30710 3.34862 -1.34153  
 H 1.01868 4.03482 -2.86988  
 H 0.26497 2.39652 -2.84126

## E (without HOAc)

SCF (BP86) Energy = -1281.67152225  
 Enthalpy 0K = -1281.299998  
 Enthalpy 298K = -1281.273548  
 Free Energy 298K = -1281.355919  
 Lowest Frequency = 30.2586 cm<sup>-1</sup>  
 Second Frequency = 35.7505 cm<sup>-1</sup>  
 SCF (BP86-D3BJ) Energy = -1281.80135597  
 SCF (MeCN) Energy = -1281.68662640  
 SCF (Toluene) Energy = -1281.67802521  
 SCF (BS2) Energy = -1281.67489536

Ru -0.22894 -0.62481 -0.26816  
 O -0.71342 -2.74463 -0.17993  
 C -1.06624 -2.71587 -1.42148  
 C -1.64287 -3.93672 -2.09438  
 O -0.93430 -1.60467 -2.05870  
 H -1.45321 -3.90269 -3.17746  
 H -1.21959 -4.85334 -1.65674  
 H -2.73562 -3.95513 -1.93800  
 C 2.77863 -0.22385 -0.51801  
 C 4.01832 0.44564 0.41382  
 C 2.30448 -0.94617 -0.60684  
 C 4.76737 0.38541 -0.77028  
 H 4.37839 1.05413 1.24999  
 C 3.06056 -1.01050 -1.79107  
 C 4.29049 -0.34007 -1.87763  
 H 5.72141 0.91886 -0.83397  
 H 2.67772 -1.58376 -2.64112  
 H 4.87626 -0.38134 -2.80169  
 H 1.45341 -1.66543 -0.48999  
 C 1.94756 -0.13779 1.73566  
 C 1.71295 0.10759 4.15090  
 H 2.15613 0.23341 5.14296  
 C 2.51839 0.02983 3.01174  
 H 3.60783 0.07370 3.09617  
 C -0.19968 -0.17699 2.70138  
 H -1.27379 -0.26784 2.52685  
 C 0.32194 0.00212 3.98074  
 H -0.36437 0.05162 4.83090  
 N 0.57481 -0.25241 1.57421  
 C -2.41873 1.27695 -0.09895  
 C -3.70985 1.77789 0.17894  
 C -2.07712 -0.08622 0.18096  
 C -4.68455 0.94134 0.73439  
 H -3.95820 2.82417 -0.03656  
 C -3.08516 -0.91062 0.74206  
 C -4.36659 -0.40330 1.01336  
 H -5.68527 1.32979 0.94919  
 H -2.85717 -1.95996 0.96145  
 H -5.12963 -1.06272 1.44479  
 C -1.33388 2.06354 -0.67851  
 C -0.31112 4.05276 -1.64739  
 H -0.37724 5.09895 -1.96195  
 C -1.41505 3.41077 -1.08011  
 H -2.35920 3.94631 -0.94784  
 C 0.91650 1.99114 -1.39138  
 H 1.81920 1.38846 -1.50423  
 C 0.87821 3.32297 -1.80967  
 H 1.77158 3.77061 -2.25358

## Ru(II) Carboxylate Structures (Figure 6)

N -0.14920 1.35366 -0.83373

D<sup>+</sup> (η<sup>6</sup>)

SCF (BP86) Energy = -1282.06544575  
 Enthalpy 0K = -1281.680956  
 Enthalpy 298K = -1281.654034  
 Free Energy 298K = -1281.740246  
 Lowest Frequency = 9.2286 cm<sup>-1</sup>  
 Second Frequency = 16.3393 cm<sup>-1</sup>  
 SCF (BP86-D3BJ) Energy = -1282.19423018  
 SCF (MeCN) Energy = -1282.12052189  
 SCF (Toluene) Energy = -1282.09744342  
 SCF (BS2) Energy = -1282.06590930

Ru -0.23790 1.09414 -0.39988  
 O 0.03493 2.60704 1.08282  
 C -1.24020 2.74565 1.23950  
 C -1.82148 3.73387 2.20376  
 O -1.97817 1.99869 0.48913  
 H -1.14004 3.88894 3.05287  
 H -1.95406 4.70287 1.69116  
 H -2.80750 3.39498 2.55334  
 C -2.01899 -1.74109 0.38725  
 C -1.95434 -3.00707 -0.24002  
 C -3.10704 -0.88573 0.10362  
 C -2.93795 -3.39483 -1.16294  
 H -1.12498 -3.68460 -0.00736  
 C -4.09705 -1.28675 -0.80713  
 C -4.01164 -2.53459 -1.44862  
 H -2.87080 -4.37262 -1.64990  
 H -4.94616 -0.62503 -1.00563  
 H -4.78719 -2.84259 -2.15676  
 H -3.18302 0.08263 0.60457  
 C -0.98070 -1.38727 1.39616  
 C 0.19838 -1.97516 3.45326  
 H 0.34981 -2.64871 4.30204  
 C -0.77341 -2.25597 2.48851  
 H -1.40922 -3.14123 2.57035  
 C 0.72393 0.02131 2.21507  
 H 1.29886 0.93637 2.06170  
 C 0.96280 -0.80915 3.31093  
 H 1.73752 -0.53498 4.03133  
 N -0.22120 -0.25001 1.26851  
 C 1.53896 0.24032 -1.47871  
 C 0.34880 -0.51029 -1.80561  
 C 1.47581 1.66866 -1.61276  
 C -0.82255 0.12466 -2.30585  
 H 0.30224 -1.57832 -1.57736  
 C 0.32043 2.32613 -2.16045  
 C -0.83396 1.55576 -2.47182  
 H -1.73050 -0.45888 -2.47352  
 H 0.28934 3.41702 -2.21753  
 H -1.76297 2.05904 -2.75459  
 H 2.32442 2.24686 -1.23568  
 C 2.76812 -0.39854 -0.92806  
 C 4.26498 -2.27954 -0.66278  
 H 4.53195 -3.32434 -0.84889  
 C 3.07044 -1.75284 -1.17649  
 H 2.41026 -2.37689 -1.78619  
 C 4.72893 -0.10265 0.26080  
 H 5.36966 0.58748 0.82299  
 C 5.11300 -1.44285 0.07452  
 H 6.05608 -1.81048 0.48845  
 N 3.58808 0.41891 -0.22265

TS (D<sup>+</sup>-E<sup>+</sup>) (η<sup>6</sup>)

SCF (BP86) Energy = -1282.04288362  
 Enthalpy 0K = -1281.659807  
 Enthalpy 298K = -1281.633420  
 Free Energy 298K = -1281.717072  
 Lowest Frequency = -102.1103 cm<sup>-1</sup>  
 Second Frequency = 14.3036 cm<sup>-1</sup>



## XYZ Coordinates and Computed Energies

## Ru(II) Carboxylate Structures (Figure 6)

SCF (BP86-D3BJ) Energy = -1282.17401029  
 SCF (MeCN) Energy = -1282.10129106  
 SCF (Toluene) Energy = -1282.07638517  
 SCF (BS2) Energy = -1282.04374955

|    |          |          |          |
|----|----------|----------|----------|
| Ru | 0.38477  | -0.79916 | -0.26668 |
| O  | 0.23698  | -1.80645 | 1.56642  |
| C  | 1.37966  | -2.40745 | 1.82723  |
| C  | 1.41721  | -3.21714 | 3.10909  |
| O  | 2.37217  | -2.29795 | 1.07034  |
| H  | 2.01876  | -2.67226 | 3.85633  |
| H  | 0.41143  | -3.38925 | 3.51674  |
| H  | 1.92204  | -4.17678 | 2.91981  |
| C  | 2.00712  | 1.82987  | 0.13439  |
| C  | 2.55922  | 2.95072  | -0.51832 |
| C  | 2.59006  | 0.55241  | -0.07160 |
| C  | 3.67099  | 2.79671  | -1.36149 |
| H  | 2.10651  | 3.93919  | -0.38883 |
| C  | 3.71133  | 0.40610  | -0.91067 |
| C  | 4.25049  | 1.52855  | -1.55753 |
| H  | 4.08914  | 3.67190  | -1.86810 |
| H  | 4.17418  | -0.57989 | -1.01674 |
| H  | 5.13013  | 1.42316  | -2.19990 |
| H  | 2.34464  | -0.31932 | 0.58230  |
| C  | 0.82916  | 1.92366  | 1.01767  |
| C  | -0.53866 | 3.00599  | 2.70784  |
| H  | -0.74425 | 3.85609  | 3.36491  |
| C  | 0.56640  | 3.02773  | 1.84994  |
| H  | 1.25462  | 3.87682  | 1.83983  |
| C  | -1.06139 | 0.80088  | 1.87784  |
| H  | -1.66856 | -0.10681 | 1.84593  |
| C  | -1.36101 | 1.86907  | 2.72822  |
| H  | -2.22470 | 1.79922  | 3.39397  |
| N  | -0.00408 | 0.83543  | 1.02865  |
| C  | -1.51553 | -0.66326 | -1.38155 |
| C  | -0.51178 | 0.08843  | -2.10883 |
| C  | -1.21680 | -2.02740 | -1.01801 |
| C  | 0.71982  | -0.51701 | -2.45720 |
| H  | -0.65923 | 1.15266  | -2.30832 |
| C  | 0.01142  | -2.65807 | -1.42555 |
| C  | 0.98748  | -1.89501 | -2.10926 |
| H  | 1.50901  | 0.08649  | -2.91194 |
| H  | 0.24368  | -3.67049 | -1.08684 |
| H  | 1.97806  | -2.31843 | -2.29247 |
| H  | -1.93302 | -2.54788 | -0.37704 |
| C  | -2.82357 | -0.07053 | -0.98019 |
| C  | -4.63087 | 1.51178  | -1.26617 |
| H  | -5.08047 | 2.36920  | -1.77600 |
| C  | -3.36268 | 1.04818  | -1.64770 |
| H  | -2.82830 | 1.52925  | -2.47180 |
| C  | -4.69225 | -0.25674 | 0.37087  |
| H  | -5.19455 | -0.80431 | 1.17742  |
| C  | -5.31264 | 0.85049  | -0.23659 |
| H  | -6.30564 | 1.17415  | 0.08767  |
| N  | -3.47961 | -0.71570 | 0.01684  |

**E<sup>+</sup>** ( $\eta^6$ )

SCF (BP86) Energy = -1282.06784697  
 Enthalpy 0K = -1281.683613  
 Enthalpy 298K = -1281.656854  
 Free Energy 298K = -1281.740959  
 Lowest Frequency = 17.7254 cm<sup>-1</sup>  
 Second Frequency = 25.9548 cm<sup>-1</sup>  
 SCF (BP86-D3BJ) Energy = -1282.19791784  
 SCF (MeCN) Energy = -1282.12231427  
 SCF (Toluene) Energy = -1282.09955152  
 SCF (BS2) Energy = -1282.06666601

|    |         |          |          |
|----|---------|----------|----------|
| Ru | 0.30062 | -0.79240 | -0.05539 |
| O  | 0.87855 | -0.71141 | 2.01976  |
| C  | 2.00616 | -0.64927 | 2.57398  |
| C  | 2.14132 | -0.68036 | 4.06977  |

|   |          |          |          |
|---|----------|----------|----------|
| O | 3.14836  | -0.55892 | 1.91450  |
| H | 2.62467  | 0.24863  | 4.41484  |
| H | 1.15617  | -0.78912 | 4.53969  |
| H | 2.79888  | -1.51473 | 4.36430  |
| C | 2.22176  | 1.31104  | -0.89417 |
| C | 3.35354  | 1.90359  | -1.49260 |
| C | 2.09862  | -0.11441 | -0.78848 |
| C | 4.39130  | 1.10266  | -1.98557 |
| H | 3.42923  | 2.99296  | -1.57744 |
| C | 3.17459  | -0.89349 | -1.28039 |
| C | 4.30474  | -0.29450 | -1.87030 |
| H | 5.26687  | 1.56521  | -2.44996 |
| H | 3.14080  | -1.98602 | -1.20336 |
| H | 5.11725  | -0.92675 | -2.24340 |
| H | 2.94928  | -0.50701 | 0.92913  |
| C | 1.11790  | 2.06883  | -0.30504 |
| C | -0.04494 | 4.04547  | 0.50068  |
| H | -0.10415 | 5.13147  | 0.61886  |
| C | 1.04624  | 3.46780  | -0.15393 |
| H | 1.85593  | 4.09298  | -0.53825 |
| C | -0.94465 | 1.83249  | 0.83510  |
| H | -1.70249 | 1.13813  | 1.21177  |
| C | -1.05308 | 3.21362  | 1.01639  |
| H | -1.91545 | 3.62059  | 1.54988  |
| N | 0.10086  | 1.27536  | 0.17377  |
| C | -1.98360 | -1.23534 | -0.57750 |
| C | -1.10415 | -1.03394 | -1.71941 |
| C | -1.58605 | -2.16059 | 0.41435  |
| C | 0.03625  | -1.86917 | -1.92953 |
| H | -1.32862 | -0.25040 | -2.44776 |
| C | -0.36344 | -2.90587 | 0.25769  |
| C | 0.40484  | -2.84354 | -0.93868 |
| H | 0.66229  | -1.71928 | -2.81285 |
| H | -0.02949 | -3.55351 | 1.07392  |
| H | 1.29200  | -3.46769 | -1.06435 |
| H | -2.18440 | -2.24543 | 1.32440  |
| C | -3.25062 | -0.46804 | -0.42156 |
| C | -5.19827 | 0.63687  | -1.33854 |
| H | -5.78993 | 0.98215  | -2.19182 |
| C | -3.97763 | -0.02314 | -1.54479 |
| H | -3.61892 | -0.21749 | -2.55979 |
| C | -4.85121 | 0.35792  | 1.03046  |
| H | -5.16801 | 0.49419  | 2.07164  |
| C | -5.64852 | 0.83320  | -0.02647 |
| H | -6.59556 | 1.33944  | 0.18040  |
| N | -3.67881 | -0.27693 | 0.85255  |

**3D<sup>+</sup>**

SCF (BP86) Energy = -1680.38957212  
 Enthalpy 0K = -1679.866976  
 Enthalpy 298K = -1679.825220  
 Free Energy 298K = -1679.945706  
 Lowest Frequency = 4.7782 cm<sup>-1</sup>  
 Second Frequency = 23.1364 cm<sup>-1</sup>  
 SCF (BP86-D3BJ) Energy = -1680.57298956  
 SCF (MeCN) Energy = -1680.44675564  
 SCF (Toluene) Energy = -1680.42140955  
 SCF (BS2) Energy = -1680.50344097

|    |          |          |          |
|----|----------|----------|----------|
| Ru | -0.00128 | 0.85694  | 0.49393  |
| C  | 2.05486  | -1.58709 | -1.24131 |
| C  | 1.26945  | -2.68544 | -0.83566 |
| C  | 3.45866  | -1.66149 | -1.09170 |
| C  | 1.86914  | -3.81778 | -0.26210 |
| H  | 0.18896  | -2.67477 | -1.00014 |
| C  | 4.05364  | -2.78866 | -0.50767 |
| C  | 3.26081  | -3.87111 | -0.09058 |
| H  | 1.24530  | -4.66742 | 0.03319  |
| H  | 5.14141  | -2.82612 | -0.39008 |
| H  | 3.72754  | -4.75794 | 0.34982  |
| H  | 4.07189  | -0.81340 | -1.41082 |
| C  | 1.47460  | -0.46077 | -2.03499 |

## XYZ Coordinates and Computed Energies

```

C 1.39825 0.58356 -4.25061
H 1.75013 0.64536 -5.28469
C 1.91980 -0.36765 -3.37343
H 2.67443 -1.08374 -3.70791
C 0.00654 1.31656 -2.43475
H -0.75550 1.97967 -2.02524
C 0.39733 1.43569 -3.76701
H -0.07529 2.19154 -4.40008
N 0.52931 0.41295 -1.55269
C -2.76485 -1.38915 -0.24817
C -2.34434 -1.25426 -1.58815
C -4.14656 -1.29096 0.03989
C -3.27699 -1.01963 -2.60959
H -1.28521 -1.34820 -1.83452
C -5.07820 -1.05056 -0.98162
C -4.64562 -0.91559 -2.31217
H -2.93295 -0.93669 -3.64550
H -6.14437 -0.98699 -0.73959
H -5.37232 -0.74679 -3.11321
H -4.48867 -1.40025 1.07477
C -1.83017 -1.78675 0.84576
C -1.37058 -3.42727 2.60514
H -1.65871 -4.31682 3.17365
C -2.19122 -2.93433 1.58806
H -3.11973 -3.44629 1.32291
C 0.14956 -1.63183 2.09251
H 1.08825 -1.08741 2.23398
C -0.16397 -2.76153 2.84978
H 0.54082 -3.10408 3.61220
N -0.65861 -1.11848 1.11763
O 1.89779 0.36561 1.18515
C 3.04327 0.85665 0.72938
C 4.21766 0.50454 1.64611
O 3.19726 1.51397 -0.31089
H 4.32027 -0.59052 1.72301
H 5.14737 0.93258 1.24603
H 4.04063 0.89017 2.66408
N 0.66056 2.69809 0.12871
C 1.11567 3.75903 -0.06419
C 1.82082 5.00730 -0.32012
H 1.77896 5.66759 0.56170
H 2.87555 4.77315 -0.54464
H 1.38061 5.53917 -1.17942
N -0.35434 1.38911 2.38080
C -0.50414 1.69987 3.50115
C -0.67740 2.08888 4.89568
H -1.51293 2.80125 4.99788
H -0.89307 1.20325 5.51631
H 0.24152 2.56687 5.27444
N -1.84732 1.46671 0.03486
C -2.88394 1.98714 -0.15725
C -4.19401 2.58138 -0.39359
H -4.46056 3.27155 0.42459
H -4.19858 3.14587 -1.34111
H -4.95574 1.78627 -0.45631

```

INT ( $^3D^+$ )

```

SCF (BP86) Energy = -1680.36814747
Enthalpy 0K = -1679.845892
Enthalpy 298K = -1679.804142
Free Energy 298K = -1679.923247
Lowest Frequency = 23.3854 cm-1
Second Frequency = 25.3254 cm-1
SCF (BP86-D3BJ) Energy = -1680.55136469
SCF (MeCN) Energy = -1680.42432126
SCF (Toluene) Energy = -1680.39986533
SCF (BS2) Energy = -1680.47990859

```

```

Ru 0.31823 0.80251 0.23477
C -2.19621 -0.87730 -1.52878
C -1.57757 -1.98012 -2.13395
C -1.54465 0.39310 -1.58060

```

## Ru(II) Carboxylate Structures (Figure 6)

```

C -0.33594 -1.84790 -2.79646
H -2.09498 -2.94423 -2.11714
C -0.29417 0.51918 -2.23115
C 0.30481 -0.61311 -2.85227
H 0.10239 -2.71857 -3.29513
H 0.10287 1.51991 -2.42219
H 1.24631 -0.49869 -3.39829
H -2.03261 1.31149 -1.23032
C -3.52883 -1.04100 -0.88695
C -5.73940 -0.22289 -0.30836
H -6.49887 0.56590 -0.31496
C -4.47996 0.00507 -0.87952
H -4.24693 0.96741 -1.34418
C -5.01108 -2.45996 0.19856
H -5.18851 -3.45736 0.62034
C -6.01757 -1.48218 0.24541
H -6.98960 -1.70826 0.69303
N -3.79508 -2.26127 -0.34665
C 2.96435 -1.63827 0.13562
C 2.86097 -2.92657 -0.43244
C 3.07718 -1.51554 1.53632
C 2.83423 -4.06571 0.38642
H 2.79413 -3.03114 -1.52032
C 3.05929 -2.65532 2.35289
C 2.93272 -3.93275 1.78209
H 2.75570 -5.05909 -0.06743
H 3.16253 -2.54847 3.43764
H 2.93136 -4.82219 2.42021
H 3.19774 -0.52365 1.97885
C 3.13564 -0.45137 -0.75186
C 4.58423 0.64048 -2.39402
H 5.46179 0.62551 -3.04744
C 4.26445 -0.46415 -1.60094
H 4.90128 -1.35259 -1.59223
C 2.64527 1.72362 -1.46406
H 1.97065 2.57796 -1.35543
C 3.76427 1.77127 -2.29733
H 3.97105 2.68477 -2.86129
N 2.29219 0.63321 -0.72201
O 0.42333 2.84695 -0.19595
C -0.61755 3.63541 -0.44489
C -0.22368 5.11099 -0.52299
O -1.79664 3.27445 -0.58607
H -0.99104 5.67274 -1.07374
H -0.15653 5.52255 0.49924
H 0.76124 5.24580 -0.99609
N -1.40000 1.08343 1.20560
C -2.36480 1.26371 1.84222
C -3.59383 1.55753 2.56605
H -3.48044 1.33697 3.64006
H -3.84827 2.62377 2.44250
H -4.41877 0.94818 2.16045
N 1.22400 1.29087 1.88551
C 1.72390 1.71073 2.85997
C 2.35703 2.23538 4.06378
H 3.44616 2.32573 3.91470
H 1.95419 3.23448 4.30071
H 2.17294 1.56797 4.92224
N 0.08805 -1.13952 0.66518
C -0.32815 -2.21124 0.89608
C -0.92434 -3.52136 1.11266
H -1.00395 -3.73932 2.19056
H -1.93576 -3.51026 0.65949
H -0.30980 -4.30442 0.63999

```

TS ( $^3D^+ - ^3E^+$ )

```

SCF (BP86) Energy = -1680.35096196
Enthalpy 0K = -1679.833884
Enthalpy 298K = -1679.792700
Free Energy 298K = -1679.909989
Lowest Frequency = -873.7643 cm-1
Second Frequency = 18.1391 cm-1

```

## XYZ Coordinates and Computed Energies

## Ru(II) Carboxylate Structures (Figure 6)

SCF (BP86-D3BJ) Energy = =  
 SCF (MeCN) Energy = =  
 SCF (Toluene) Energy = -1680.38153973  
 SCF (BS2) Energy = =

|    |          |          |          |
|----|----------|----------|----------|
| Ru | -0.12571 | -0.95127 | 0.26623  |
| C  | 1.60818  | 1.17565  | -1.49899 |
| C  | 1.50708  | 2.23366  | -2.43050 |
| C  | 0.69277  | 0.07205  | -1.55544 |
| C  | 0.58961  | 2.18614  | -3.48877 |
| H  | 2.19875  | 3.07738  | -2.33875 |
| C  | -0.19435 | 0.04524  | -2.67313 |
| C  | -0.24502 | 1.06334  | -3.63272 |
| H  | 0.55071  | 3.00343  | -4.21635 |
| H  | -0.86277 | -0.81471 | -2.79231 |
| H  | -0.93536 | 0.99055  | -4.47958 |
| H  | 1.28444  | -1.16706 | -1.49218 |
| C  | 2.80065  | 1.24038  | -0.59432 |
| C  | 4.97744  | 0.38762  | 0.05944  |
| H  | 5.76410  | -0.37279 | -0.00145 |
| C  | 3.77243  | 0.21391  | -0.63521 |
| H  | 3.59793  | -0.67874 | -1.24219 |
| C  | 4.14552  | 2.51897  | 0.79649  |
| H  | 4.26149  | 3.45475  | 1.35889  |
| C  | 5.17432  | 1.56484  | 0.79772  |
| H  | 6.10465  | 1.75189  | 1.34220  |
| N  | 2.98772  | 2.38308  | 0.11633  |
| C  | -2.63922 | 1.74475  | 0.15204  |
| C  | -1.78313 | 2.54316  | -0.63407 |
| C  | -3.27150 | 2.31856  | 1.27851  |
| C  | -1.56838 | 3.88844  | -0.29888 |
| H  | -1.30756 | 2.11829  | -1.52048 |
| C  | -3.04527 | 3.66123  | 1.61791  |
| C  | -2.19998 | 4.45350  | 0.82195  |
| H  | -0.91461 | 4.49956  | -0.92886 |
| H  | -3.54610 | 4.09277  | 2.49069  |
| H  | -2.04371 | 5.50899  | 1.06796  |
| H  | -3.94863 | 1.70812  | 1.88611  |
| C  | -3.05737 | 0.37970  | -0.28554 |
| C  | -4.95937 | -0.97258 | -1.03663 |
| H  | -6.02618 | -1.07309 | -1.25817 |
| C  | -4.43701 | 0.23142  | -0.56330 |
| H  | -5.07995 | 1.10428  | -0.42470 |
| C  | -2.72010 | -1.84363 | -0.92442 |
| H  | -2.00669 | -2.66202 | -1.03727 |
| C  | -4.06729 | -2.03380 | -1.23171 |
| H  | -4.39634 | -3.00531 | -1.61025 |
| N  | -2.19096 | -0.67470 | -0.45075 |
| O  | -0.06948 | -2.86875 | -0.65539 |
| C  | 0.90952  | -3.16334 | -1.43801 |
| C  | 1.01716  | -4.58070 | -1.95137 |
| O  | 1.78170  | -2.30505 | -1.82199 |
| H  | 2.06310  | -4.91984 | -1.89827 |
| H  | 0.36570  | -5.25710 | -1.38199 |
| H  | 0.72389  | -4.60196 | -3.01488 |
| N  | 1.60940  | -1.43024 | 1.08384  |
| C  | 2.56314  | -1.77333 | 1.67399  |
| C  | 3.76526  | -2.18663 | 2.38570  |
| H  | 3.55892  | -2.30071 | 3.46304  |
| H  | 4.13102  | -3.15079 | 1.99437  |
| H  | 4.55490  | -1.42789 | 2.25293  |
| N  | -1.04032 | -1.81116 | 1.85736  |
| C  | -1.57027 | -2.33455 | 2.76344  |
| C  | -2.23395 | -2.99073 | 3.88405  |
| H  | -3.32792 | -2.88260 | 3.79667  |
| H  | -1.98788 | -4.06565 | 3.89932  |
| H  | -1.91240 | -2.54166 | 4.83850  |
| N  | 0.01829  | 0.76794  | 1.23588  |
| C  | 0.29805  | 1.72741  | 1.84682  |
| C  | 0.66735  | 2.96046  | 2.52623  |
| H  | 1.17401  | 2.74274  | 3.48107  |
| H  | 1.35787  | 3.51229  | 1.86511  |

H -0.22823 3.57168 2.71959

**3E+**

SCF (BP86) Energy = -1680.35995727  
 Enthalpy 0K = -1679.838641  
 Enthalpy 298K = -1679.796672  
 Free Energy 298K = -1679.916885  
 Lowest Frequency = 18.9765 cm<sup>-1</sup>  
 Second Frequency = 22.0693 cm<sup>-1</sup>  
 SCF (BP86-D3BJ) Energy = -1680.54251887  
 SCF (MeCN) Energy = -1680.41391658  
 SCF (Toluene) Energy = -1680.39021319  
 SCF (BS2) Energy = -1680.47016172

|    |          |          |          |
|----|----------|----------|----------|
| Ru | 0.16883  | -0.84851 | -0.34114 |
| C  | -1.80478 | 0.87234  | 1.53322  |
| C  | -2.15274 | 1.38188  | 2.81383  |
| C  | -0.62106 | 0.07185  | 1.36780  |
| C  | -1.38220 | 1.13404  | 3.95365  |
| H  | -3.05267 | 2.00162  | 2.89902  |
| C  | 0.10745  | -0.18615 | 2.57198  |
| C  | -0.24428 | 0.32383  | 3.82995  |
| H  | -1.67437 | 1.55431  | 4.92100  |
| H  | 0.99961  | -0.81923 | 2.51806  |
| H  | 0.37121  | 0.08923  | 4.70556  |
| H  | -1.69278 | -1.54392 | 1.57463  |
| C  | -2.81971 | 1.20684  | 0.47192  |
| C  | -5.15915 | 1.19496  | -0.21825 |
| H  | -6.20210 | 0.90155  | -0.05635 |
| C  | -4.16123 | 0.79740  | 0.68082  |
| H  | -4.40860 | 0.18407  | 1.55291  |
| C  | -3.44302 | 2.33854  | -1.44956 |
| H  | -3.12417 | 2.96635  | -2.29268 |
| C  | -4.79505 | 1.98877  | -1.31696 |
| H  | -5.53514 | 2.33989  | -2.04236 |
| N  | -2.46913 | 1.97441  | -0.58884 |
| C  | 2.62561  | 1.86015  | 0.22252  |
| C  | 1.66888  | 2.49517  | 1.04159  |
| C  | 3.32947  | 2.63381  | -0.73102 |
| C  | 1.41381  | 3.86752  | 0.89654  |
| H  | 1.13966  | 1.92005  | 1.80355  |
| C  | 3.06988  | 4.00510  | -0.87440 |
| C  | 2.11039  | 4.62714  | -0.05698 |
| H  | 0.67555  | 4.34615  | 1.54738  |
| H  | 3.62999  | 4.58958  | -1.61202 |
| H  | 1.91790  | 5.70055  | -0.15388 |
| H  | 4.08511  | 2.15291  | -1.36213 |
| C  | 3.06630  | 0.44828  | 0.43846  |
| C  | 4.98919  | -0.97414 | 0.98674  |
| H  | 6.04964  | -1.08533 | 1.23200  |
| C  | 4.43900  | 0.28446  | 0.74432  |
| H  | 5.05482  | 1.18467  | 0.81258  |
| C  | 2.79142  | -1.86964 | 0.60386  |
| H  | 2.10495  | -2.71459 | 0.53596  |
| C  | 4.13291  | -2.08038 | 0.91903  |
| H  | 4.48567  | -3.09846 | 1.10481  |
| N  | 2.23278  | -0.64451 | 0.35845  |
| O  | 0.02690  | -2.78631 | 0.61771  |
| C  | -0.91090 | -3.24391 | 1.32032  |
| C  | -0.95736 | -4.69079 | 1.72548  |
| O  | -1.91681 | -2.50992 | 1.76871  |
| H  | -0.74205 | -4.77297 | 2.80470  |
| H  | -1.96905 | -5.09603 | 1.56649  |
| H  | -0.21813 | -5.27139 | 1.15925  |
| N  | -1.61432 | -1.21007 | -1.10529 |
| C  | -2.62722 | -1.48110 | -1.63420 |
| C  | -3.90316 | -1.79399 | -2.26477 |
| H  | -3.83690 | -1.66155 | -3.35775 |
| H  | -4.19273 | -2.83756 | -2.05569 |
| H  | -4.68543 | -1.12147 | -1.87424 |
| N  | 1.03139  | -1.87616 | -1.98585 |
| C  | 1.49427  | -2.43934 | -2.90522 |

## XYZ Coordinates and Computed Energies

|   |          |          |          |
|---|----------|----------|----------|
| C | 2.07359  | -3.13865 | -4.04714 |
| H | 1.57051  | -2.83305 | -4.97953 |
| H | 3.14734  | -2.90348 | -4.13459 |
| H | 1.96098  | -4.22910 | -3.92786 |
| N | 0.24732  | 0.80865  | -1.36330 |
| C | 0.18508  | 1.76606  | -2.03364 |
| C | 0.09106  | 3.00223  | -2.79458 |
| H | -0.29058 | 2.81143  | -3.81153 |
| H | -0.59445 | 3.69011  | -2.27178 |
| H | 1.08181  | 3.47997  | -2.86497 |

## Ru(II) Carboxylate Structures (Figure 6)

## XYZ Coordinates and Computed Energies

## Ru(II) Carboxylate Structures (Figure 7)

**6F<sup>2+</sup>**

SCF (BP86) Energy = -891.226975638  
 Enthalpy 0K = -890.949934  
 Enthalpy 298K = -890.919875  
 Free Energy 298K = -891.024473  
 Lowest Frequency = 1.7042 cm<sup>-1</sup>  
 Second Frequency = 5.4741 cm<sup>-1</sup>  
 SCF (BP86-D3BJ) Energy = -891.288170342  
 SCF (MeCN) Energy = -891.417842274  
 SCF (Toluene) Energy = -891.340482156  
 SCF (BS2) Energy = -891.151556051

|    |          |          |          |
|----|----------|----------|----------|
| N  | 1.43112  | -0.00292 | -1.42559 |
| C  | 2.25978  | -0.00335 | -2.25087 |
| N  | -1.39683 | 0.40783  | -1.40113 |
| C  | -2.20755 | 0.64311  | -2.21055 |
| N  | 0.29175  | 1.97818  | 0.28630  |
| C  | 0.46273  | 3.12333  | 0.45115  |
| N  | -1.43167 | 0.00404  | 1.42509  |
| C  | -2.26154 | 0.00746  | 2.24915  |
| C  | 3.29159  | -0.00380 | -3.27832 |
| H  | 4.23435  | 0.39646  | -2.86946 |
| H  | 3.46800  | -1.03105 | -3.63859 |
| H  | 2.97914  | 0.62303  | -4.13014 |
| C  | 0.67660  | 4.54893  | 0.65652  |
| H  | 0.16386  | 5.12685  | -0.13041 |
| H  | 0.27897  | 4.85475  | 1.63861  |
| H  | 1.75445  | 4.77967  | 0.62184  |
| C  | -3.29476 | 0.01199  | 3.27516  |
| H  | -3.84169 | 0.96947  | 3.25854  |
| H  | -4.00959 | -0.80876 | 3.09749  |
| H  | -2.84098 | -0.12108 | 4.27141  |
| C  | -3.21755 | 0.93611  | -3.21767 |
| H  | -2.73589 | 1.16648  | -4.18259 |
| H  | -3.88346 | 0.06725  | -3.35115 |
| H  | -3.82319 | 1.80360  | -2.90646 |
| N  | 1.39503  | -0.40884 | 1.40252  |
| C  | 2.20162  | -0.64655 | 2.21534  |
| C  | 3.20557  | -0.94264 | 3.22761  |
| H  | 2.85993  | -1.76553 | 3.87536  |
| H  | 4.15210  | -1.24187 | 2.74731  |
| H  | 3.38943  | -0.05216 | 3.85163  |
| Ru | -0.00004 | -0.00002 | -0.00003 |
| N  | -0.28960 | -1.97844 | -0.28724 |
| C  | -0.45528 | -3.12405 | -0.45426 |
| C  | -0.66100 | -4.55036 | -0.66311 |
| H  | 0.24937  | -5.10911 | -0.38886 |
| H  | -1.49854 | -4.90817 | -0.04131 |
| H  | -0.89444 | -4.74893 | -1.72247 |

**3A<sup>2+</sup>**

SCF (BP86) Energy = -725.084942129  
 Enthalpy 0K = -724.846559  
 Enthalpy 298K = -724.825534  
 Free Energy 298K = -724.899859  
 Lowest Frequency = 14.8400 cm<sup>-1</sup>  
 Second Frequency = 18.9807 cm<sup>-1</sup>  
 SCF (BP86-D3BJ) Energy = -725.143825219  
 SCF (MeCN) Energy = -725.302227226  
 SCF (Toluene) Energy = -725.214329131  
 SCF (BS2) Energy = -724.954581954

|    |         |          |          |
|----|---------|----------|----------|
| C  | 2.17914 | 1.42683  | 0.11105  |
| C  | 2.18034 | 0.79409  | -1.18871 |
| C  | 2.17990 | -0.62011 | -1.28848 |
| C  | 2.17846 | -1.42941 | -0.09064 |
| C  | 2.17744 | -0.80866 | 1.18397  |
| C  | 2.17775 | 0.63334  | 1.28591  |
| Ru | 0.44921 | -0.00017 | 0.00044  |
| H  | 2.11973 | -1.09756 | -2.27047 |
| H  | 2.11617 | 1.11182  | 2.26730  |
| H  | 2.11839 | 2.51597  | 0.18839  |

|   |          |          |          |
|---|----------|----------|----------|
| H | 2.11541  | -1.42026 | 2.08840  |
| H | 2.11730  | -2.51857 | -0.16707 |
| H | 2.12080  | 1.40486  | -2.09385 |
| N | -0.81401 | -0.11819 | 1.60734  |
| C | -1.52268 | -0.18682 | 2.53533  |
| C | -2.39329 | -0.27234 | 3.69707  |
| H | -3.44914 | -0.21058 | 3.38406  |
| H | -2.23021 | -1.22985 | 4.22046  |
| H | -2.17679 | 0.55673  | 4.39204  |
| N | -0.81165 | -1.33358 | -0.90730 |
| N | -0.81104 | 1.45217  | -0.70254 |
| C | -1.51729 | 2.29172  | -1.10805 |
| C | -1.51855 | -2.10372 | -1.43194 |
| C | -2.38666 | -3.06820 | -2.08862 |
| H | -2.24992 | -4.06610 | -1.63817 |
| H | -3.44147 | -2.76595 | -1.97616 |
| H | -2.14278 | -3.12416 | -3.16324 |
| C | -2.38441 | 3.34319  | -1.61553 |
| H | -3.43506 | 3.00772  | -1.59987 |
| H | -2.28731 | 4.24650  | -0.98942 |
| H | -2.10438 | 3.59478  | -2.65268 |

**5F<sup>+</sup> (κ<sup>1</sup>)**

SCF (BP86) Energy = -987.234219222  
 Enthalpy 0K = -986.953661  
 Enthalpy 298K = -986.922819  
 Free Energy 298K = -987.022968  
 Lowest Frequency = 9.5290 cm<sup>-1</sup>  
 Second Frequency = 17.4976 cm<sup>-1</sup>  
 SCF (BP86-D3BJ) Energy = -987.299667163  
 SCF (MeCN) Energy = -987.297866185  
 SCF (Toluene) Energy = -987.270113235  
 SCF (BS2) Energy = -987.198114781

|    |          |          |          |
|----|----------|----------|----------|
| N  | 1.31371  | 1.34007  | 0.99706  |
| C  | 1.87447  | 2.11376  | 1.67233  |
| N  | 1.27801  | -1.49468 | 0.79309  |
| C  | 1.81932  | -2.36896 | 1.35144  |
| N  | 1.54098  | 0.10091  | -1.61949 |
| C  | 2.26930  | 0.15757  | -2.53712 |
| N  | -0.89229 | -1.32329 | -1.02214 |
| C  | -1.63630 | -2.06488 | -1.53361 |
| C  | 2.56027  | 3.07683  | 2.52412  |
| H  | 2.48081  | 4.09012  | 2.09679  |
| H  | 2.10620  | 3.08060  | 3.52903  |
| H  | 3.62742  | 2.81617  | 2.61832  |
| C  | 3.17532  | 0.22757  | -3.67764 |
| H  | 4.17144  | 0.57429  | -3.35565 |
| H  | 3.28286  | -0.76597 | -4.14403 |
| H  | 2.78636  | 0.93016  | -4.43343 |
| C  | -2.63974 | -2.94733 | -2.11093 |
| H  | -2.41185 | -3.99978 | -1.87541 |
| H  | -3.62596 | -2.69080 | -1.68819 |
| H  | -2.67724 | -2.82999 | -3.20633 |
| C  | 2.48156  | -3.45773 | 2.05810  |
| H  | 3.57154  | -3.29371 | 2.08417  |
| H  | 2.10679  | -3.51723 | 3.09351  |
| H  | 2.28103  | -4.41791 | 1.55459  |
| O  | -2.95521 | -0.00287 | 0.51847  |
| C  | -2.27262 | -0.08782 | 1.54936  |
| C  | -2.91402 | -0.23048 | 2.93303  |
| H  | -2.32530 | 0.28227  | 3.70860  |
| H  | -3.93991 | 0.16381  | 2.90735  |
| H  | -2.96163 | -1.29988 | 3.20275  |
| O  | -0.94630 | -0.09934 | 1.62126  |
| Ru | 0.25526  | 0.00428  | -0.05925 |
| N  | -0.85904 | 1.48528  | -0.81580 |
| C  | -1.58766 | 2.31091  | -1.20620 |
| C  | -2.57320 | 3.29109  | -1.63832 |
| H  | -3.56379 | 2.99259  | -1.25520 |
| H  | -2.32361 | 4.29040  | -1.24573 |
| H  | -2.61439 | 3.34310  | -2.73861 |

**4F<sup>+</sup>** ( $\kappa^2$ )

SCF (BP86) Energy = -854.470356594  
 Enthalpy 0K = -854.235272  
 Enthalpy 298K = -854.209710  
 Free Energy 298K = -854.296524  
 Lowest Frequency = 15.8938  $\text{cm}^{-1}$   
 Second Frequency = 16.6417  $\text{cm}^{-1}$   
 SCF (BP86-D3BJ) Energy = -854.521763404  
 SCF (MeCN) Energy = -854.531114858  
 SCF (Toluene) Energy = -854.505329434  
 SCF (BS2) Energy = -854.393081696

|    |          |          |          |
|----|----------|----------|----------|
| N  | -1.99534 | 0.15915  | 0.00008  |
| C  | -3.16103 | 0.26959  | 0.00010  |
| N  | -0.01428 | -1.30936 | -1.42330 |
| C  | -0.02229 | -2.07131 | -2.31474 |
| N  | -0.01418 | -1.30942 | 1.42328  |
| C  | -0.02208 | -2.07144 | 2.31466  |
| N  | 1.99445  | 0.12070  | -0.00005 |
| C  | 3.16261  | 0.20213  | -0.00009 |
| C  | -4.61049 | 0.41528  | 0.00012  |
| H  | -4.93611 | 0.96855  | 0.89674  |
| H  | -4.93600 | 0.96988  | -0.89572 |
| H  | -5.09553 | -0.57488 | -0.00065 |
| C  | -0.03187 | -2.99444 | 3.44283  |
| H  | -0.93616 | -3.62490 | 3.41504  |
| H  | 0.85396  | -3.65033 | 3.40991  |
| H  | -0.02122 | -2.43453 | 4.39317  |
| C  | 4.61532  | 0.31134  | -0.00016 |
| H  | 5.07512  | -0.69081 | 0.00147  |
| H  | 4.95510  | 0.85522  | -0.89729 |
| H  | 4.95496  | 0.85805  | 0.89530  |
| C  | -0.03228 | -2.99421 | -3.44299 |
| H  | -0.93014 | -3.63344 | -3.40809 |
| H  | -0.03464 | -2.43409 | -4.39326 |
| H  | 0.86015  | -3.64144 | -3.41733 |
| O  | 0.01233  | 1.89410  | 1.09994  |
| C  | 0.02205  | 2.57410  | 0.00005  |
| C  | 0.07099  | 4.07406  | 0.00007  |
| H  | -0.41237 | 4.47121  | -0.90441 |
| H  | -0.41156 | 4.47117  | 0.90498  |
| H  | 1.12375  | 4.40614  | -0.00043 |
| O  | 0.01228  | 1.89413  | -1.09986 |
| Ru | -0.00105 | 0.07865  | 0.00002  |

**f-3F** ( $\kappa^2\kappa^1$ )

SCF (BP86) Energy = -950.375149815  
 Enthalpy 0K = -950.137086  
 Enthalpy 298K = -950.110719  
 Free Energy 298K = -950.197295  
 Lowest Frequency = 22.9867  $\text{cm}^{-1}$   
 Second Frequency = 36.3143  $\text{cm}^{-1}$   
 SCF (BP86-D3BJ) Energy = -950.430470073  
 SCF (MeCN) Energy = -950.403661510  
 SCF (Toluene) Energy = -950.388479371  
 SCF (BS2) Energy = -950.339062014

|    |          |          |          |
|----|----------|----------|----------|
| Ru | -0.31674 | 0.06719  | -0.00001 |
| N  | -1.96920 | -1.00933 | -0.00006 |
| C  | -2.97688 | -1.61811 | -0.00005 |
| N  | 0.52523  | -1.01995 | 1.38779  |
| C  | 1.08016  | -1.60540 | 2.24032  |
| N  | 0.52524  | -1.01991 | -1.38785 |
| C  | 1.08020  | -1.60534 | -2.24036 |
| C  | -4.23327 | -2.35841 | 0.00013  |
| H  | -4.83187 | -2.10927 | -0.89326 |
| H  | -4.04581 | -3.44598 | -0.00193 |
| H  | -4.82986 | -2.11230 | 0.89570  |
| C  | 1.87863  | -2.26053 | 3.26768  |
| H  | 1.64180  | -1.85498 | 4.26626  |
| H  | 1.69327  | -3.34795 | 3.28102  |

|   |          |          |          |
|---|----------|----------|----------|
| H | 2.94959  | -2.08890 | 3.06232  |
| C | 1.87888  | -2.26039 | -3.26762 |
| H | 1.64162  | -1.85539 | -4.26632 |
| H | 2.94977  | -2.08806 | -3.06252 |
| H | 1.69416  | -3.34793 | -3.28048 |
| O | -1.30450 | 1.61228  | -1.10489 |
| C | -1.60903 | 2.20258  | 0.00001  |
| O | -1.30452 | 1.61224  | 1.10489  |
| C | -2.26598 | 3.55926  | 0.00002  |
| H | -2.87879 | 3.68890  | 0.90454  |
| H | -1.48150 | 4.33558  | 0.00004  |
| H | -2.87878 | 3.68893  | -0.90450 |
| O | 1.24711  | 1.40652  | 0.00002  |
| C | 2.52328  | 1.07002  | -0.00000 |
| O | 2.99980  | -0.07672 | -0.00007 |
| C | 3.42918  | 2.31193  | 0.00001  |
| H | 3.22190  | 2.93427  | 0.88673  |
| H | 4.48604  | 2.00827  | -0.00005 |
| H | 3.22182  | 2.93435  | -0.88664 |

**m-3F** ( $\kappa^2\kappa^1$ )

SCF (BP86) Energy = -950.367950845  
 Enthalpy 0K = -950.130302  
 Enthalpy 298K = -950.103601  
 Free Energy 298K = -950.194307  
 Lowest Frequency = 3.2056  $\text{cm}^{-1}$   
 Second Frequency = 21.8810  $\text{cm}^{-1}$   
 SCF (BP86-D3BJ) Energy = -950.422541032  
 SCF (MeCN) Energy = -950.399823277  
 SCF (Toluene) Energy = -950.382742275  
 SCF (BS2) Energy = -950.331397239

|    |          |          |          |
|----|----------|----------|----------|
| Ru | 0.16572  | -0.09906 | -0.19254 |
| N  | 2.06604  | 0.12468  | 0.28736  |
| C  | 3.18403  | 0.24493  | 0.62418  |
| N  | 0.24209  | 1.39304  | -1.43367 |
| C  | 0.28425  | 2.29706  | -2.18662 |
| N  | -1.74835 | -0.37712 | -0.58162 |
| C  | -2.88943 | -0.57358 | -0.76009 |
| C  | 4.56586  | 0.39271  | 1.06314  |
| H  | 4.82265  | 1.45994  | 1.17366  |
| H  | 4.71138  | -0.10142 | 2.03892  |
| H  | 5.25975  | -0.06085 | 0.33483  |
| C  | 0.34436  | 3.38163  | -3.15932 |
| H  | 1.34407  | 3.84920  | -3.15468 |
| H  | 0.14357  | 3.00845  | -4.17921 |
| H  | -0.39909 | 4.16244  | -2.92258 |
| C  | -4.33292 | -0.76505 | -0.78073 |
| H  | -4.58855 | -1.80031 | -1.06198 |
| H  | -4.73195 | -0.56030 | 0.22807  |
| H  | -4.81114 | -0.08014 | -1.50071 |
| O  | 0.64334  | -1.87689 | -1.35619 |
| C  | 0.50431  | -2.59770 | -0.29728 |
| O  | 0.20940  | -2.00815 | 0.80808  |
| C  | 0.64878  | -4.10028 | -0.35577 |
| H  | 1.07756  | -4.47764 | 0.58488  |
| H  | -0.34727 | -4.55940 | -0.48042 |
| H  | 1.27604  | -4.39298 | -1.21052 |
| O  | -0.19895 | 1.32805  | 1.28177  |
| C  | -1.19313 | 1.18548  | 2.13936  |
| O  | -2.06252 | 0.30150  | 2.14941  |
| C  | -1.15867 | 2.26939  | 3.23068  |
| H  | -0.68169 | 3.19617  | 2.87670  |
| H  | -2.18231 | 2.47475  | 3.57952  |
| H  | -0.57771 | 1.89273  | 4.09094  |

**c-2F** ( $2\kappa^2$ )

SCF (BP86) Energy = -817.609089806  
 Enthalpy 0K = -817.416617  
 Enthalpy 298K = -817.395373  
 Free Energy 298K = -817.469800  
 Lowest Frequency = 20.7944  $\text{cm}^{-1}$

## XYZ Coordinates and Computed Energies

## Ru(II) Carboxylate Structures (Figure 7)

Second Frequency = 23.8982 cm<sup>-1</sup>  
 SCF (BP86-D3BJ) Energy = -817.650885546  
 SCF (MeCN) Energy = -817.630707906  
 SCF (Toluene) Energy = -1083.15017290  
 SCF (BS2) Energy = -817.530437528

|    |          |          |          |
|----|----------|----------|----------|
| Ru | -0.00009 | 0.08090  | -0.00002 |
| N  | 1.21586  | -1.25343 | -0.68751 |
| C  | 1.97403  | -2.03597 | -1.13762 |
| N  | -1.21556 | -1.25404 | 0.68715  |
| C  | -1.97335 | -2.03699 | 1.13719  |
| C  | 2.88545  | -2.98878 | -1.75984 |
| H  | 3.61970  | -2.46190 | -2.39400 |
| H  | 3.43946  | -3.56435 | -0.99792 |
| H  | 2.33125  | -3.70111 | -2.39601 |
| C  | -2.88384 | -2.99061 | 1.75953  |
| H  | -3.67365 | -2.45998 | 2.31936  |
| H  | -3.36995 | -3.62863 | 1.00102  |
| H  | -2.34246 | -3.64421 | 2.46601  |
| O  | 1.45983  | 1.62660  | -0.27466 |
| C  | 1.89116  | 1.42929  | 0.92403  |
| C  | 2.95257  | 2.31261  | 1.52856  |
| H  | 3.46686  | 1.78984  | 2.34808  |
| H  | 3.67301  | 2.62330  | 0.75684  |
| H  | 2.47853  | 3.22215  | 1.93681  |
| O  | 1.35418  | 0.47351  | 1.60418  |
| O  | -1.35434 | 0.47363  | -1.60413 |
| C  | -1.89168 | 1.42904  | -0.92373 |
| O  | -1.46054 | 1.62607  | 0.27508  |
| C  | -2.95324 | 2.31226  | -1.52812 |
| H  | -3.67360 | 2.62289  | -0.75631 |
| H  | -2.47933 | 3.22184  | -1.93645 |
| H  | -3.46759 | 1.78945  | -2.34758 |

**t-2F** (2κ<sup>2</sup>)  
 SCF (BP86) Energy = -817.605958375  
 Enthalpy 0K = -817.413625  
 Enthalpy 298K = -817.392185  
 Free Energy 298K = -817.471124  
 Lowest Frequency = 2.0102 cm<sup>-1</sup>  
 Second Frequency = 5.2030 cm<sup>-1</sup>  
 SCF (BP86-D3BJ) Energy = -817.648207278  
 SCF (MeCN) Energy = -817.630534346  
 SCF (Toluene) Energy = -1083.14941919  
 SCF (BS2) Energy = -817.527583962

|    |          |          |          |
|----|----------|----------|----------|
| Ru | 0.00696  | 0.00112  | -0.00002 |
| N  | 1.96342  | -0.00102 | -0.00015 |
| C  | 3.14019  | -0.00336 | -0.00014 |
| N  | -1.94935 | 0.00161  | -0.00003 |
| C  | -3.12639 | 0.00069  | 0.00003  |
| C  | 4.59753  | -0.00874 | 0.00023  |
| H  | 4.98533  | -0.52282 | 0.89676  |
| H  | 4.98571  | -0.52692 | -0.89376 |
| H  | 4.98718  | 1.02368  | -0.00207 |
| C  | -4.58377 | -0.00326 | 0.00021  |
| H  | -4.97284 | 1.02944  | 0.00100  |
| H  | -4.97264 | -0.51822 | -0.89539 |
| H  | -4.97242 | -0.51949 | 0.89518  |
| O  | 0.00796  | -1.84598 | 1.09921  |
| C  | 0.00146  | -2.51543 | -0.00003 |
| C  | -0.04659 | -4.02455 | -0.00003 |
| H  | 0.43958  | -4.42114 | -0.90371 |
| H  | 0.43895  | -4.42113 | 0.90399  |
| H  | -1.09829 | -4.36000 | -0.00042 |
| O  | 0.00789  | -1.84598 | -1.09926 |
| O  | 0.01058  | 1.84820  | 1.09922  |
| C  | 0.00506  | 2.51761  | -0.00003 |
| O  | 0.01051  | 1.84819  | -1.09927 |
| C  | -0.04083 | 4.02682  | -0.00002 |
| H  | 0.44501  | 4.42271  | -0.90419 |
| H  | -1.09202 | 4.36383  | 0.00064  |

H 0.44609 4.42272 0.90357

**c-4F** (2κ<sup>1</sup>)  
 SCF (BP86) Energy = -1083.13381665  
 Enthalpy 0K = -1082.850419  
 Enthalpy 298K = -1082.818734  
 Free Energy 298K = -1082.918388  
 Lowest Frequency = 30.7870 cm<sup>-1</sup>  
 Second Frequency = 31.9477 cm<sup>-1</sup>  
 SCF (BP86-D3BJ) Energy = -1083.20308512  
 SCF (MeCN) Energy = -1083.16910722  
 SCF (Toluene) Energy = -1083.15017290  
 SCF (BS2) Energy = -1083.14000703

|    |          |          |          |
|----|----------|----------|----------|
| N  | 1.04128  | 1.68810  | -0.05506 |
| C  | 1.68289  | 2.65771  | 0.07375  |
| N  | -1.24719 | 0.74965  | -1.48665 |
| C  | -2.04304 | 1.19269  | -2.22636 |
| N  | -1.04118 | -1.68806 | -0.05479 |
| C  | -1.68289 | -2.65759 | 0.07420  |
| C  | 2.57315  | 3.78965  | 0.29002  |
| H  | 2.17714  | 4.44670  | 1.08231  |
| H  | 3.56393  | 3.41596  | 0.60065  |
| H  | 2.68998  | 4.38307  | -0.63216 |
| C  | -3.13402 | 1.72845  | -3.03036 |
| H  | -2.94832 | 2.78386  | -3.29230 |
| H  | -3.25708 | 1.15543  | -3.96508 |
| H  | -4.07282 | 1.66801  | -2.45268 |
| C  | -2.57337 | -3.78930 | 0.29070  |
| H  | -2.17843 | -4.44529 | 1.08440  |
| H  | -3.56459 | -3.41522 | 0.59949  |
| H  | -2.68893 | -4.38394 | -0.63086 |
| O  | 3.20437  | -0.15768 | 0.68239  |
| C  | 2.43395  | -0.70178 | 1.49410  |
| O  | 1.12532  | -0.81254 | 1.41107  |
| C  | 2.96950  | -1.33204 | 2.79155  |
| H  | 2.65804  | -0.72003 | 3.65546  |
| H  | 2.54819  | -2.33955 | 2.94089  |
| H  | 4.06788  | -1.38291 | 2.76232  |
| O  | -1.12533 | 0.81286  | 1.41081  |
| C  | -2.43396 | 0.70205  | 1.49381  |
| O  | -3.20434 | 0.15773  | 0.68221  |
| C  | -2.96957 | 1.33235  | 2.79123  |
| H  | -2.54655 | 2.33894  | 2.94186  |
| H  | -4.06784 | 1.38514  | 2.76105  |
| H  | -2.66007 | 0.71900  | 3.65490  |
| Ru | 0.00007  | -0.00001 | -0.13699 |
| N  | 1.24733  | -0.74992 | -1.48648 |
| C  | 2.04307  | -1.19314 | -2.22621 |
| C  | 3.13382  | -1.72915 | -3.03037 |
| H  | 3.25693  | -1.15606 | -3.96504 |
| H  | 4.07273  | -1.66904 | -2.45282 |
| H  | 2.94777  | -2.78447 | -3.29240 |

**t-4F** (2κ<sup>1</sup>)  
 SCF (BP86) Energy = -1083.13257282  
 Enthalpy 0K = -1082.849270  
 Enthalpy 298K = -1082.817441  
 Free Energy 298K = -1082.918392  
 Lowest Frequency = 22.4094 cm<sup>-1</sup>  
 Second Frequency = 24.9524 cm<sup>-1</sup>  
 SCF (BP86-D3BJ) Energy = -1083.20127459  
 SCF (MeCN) Energy = -1083.16801488  
 SCF (Toluene) Energy = -1083.14941919  
 SCF (BS2) Energy = -1083.13832420

|   |          |          |          |
|---|----------|----------|----------|
| N | 1.05172  | 1.46052  | -0.82666 |
| C | 1.69937  | 2.30059  | -1.32220 |
| N | 1.09143  | -1.32425 | -0.98924 |
| C | 1.75910  | -2.08318 | -1.58003 |
| N | -1.05167 | -1.46079 | 0.82657  |
| C | -1.69956 | -2.30079 | 1.32190  |

## XYZ Coordinates and Computed Energies

## Ru(II) Carboxylate Structures (Figure 7)

```

C 2.59992 3.30051 -1.87959
H 2.56741 3.28464 -2.98203
H 2.31910 4.31099 -1.53825
H 3.63269 3.09101 -1.55149
C 2.68131 -2.98753 -2.25322
H 2.64005 -2.84520 -3.34626
H 3.71088 -2.79030 -1.90794
H 2.42915 -4.03780 -2.03003
C -2.60049 -3.30058 1.87890
H -2.57048 -3.28283 2.98138
H -3.63270 -3.09249 1.54815
H -2.31804 -4.31139 1.53990
O 3.24671 0.00979 0.55628
C 2.56563 -0.06423 1.59477
O 1.25468 -0.07788 1.69446
C 3.24435 -0.18803 2.97171
H 2.72347 0.41937 3.72898
H 3.20350 -1.23876 3.30894
H 4.29922 0.11611 2.90016
O -1.25442 0.07747 -1.69449
C -2.56536 0.06424 -1.59479
O -3.24648 -0.00981 -0.55632
C -3.24467 0.19022 -2.97121
H -2.71171 -0.39754 -3.73541
H -4.29370 -0.13465 -2.90413
H -3.22507 1.24581 -3.29505
Ru 0.00009 -0.00014 0.00000
N -1.09125 1.32392 0.98928
C -1.75893 2.08276 1.58017
C -2.68125 2.98696 2.25342
H -2.64147 2.84308 3.34631
H -2.42796 4.03733 2.03201
H -3.71055 2.79101 1.90661

```

**1A**

```

SCF (BP86) Energy = -917.075823895
Enthalpy 0K = -916.830211
Enthalpy 298K = -916.808205
Free Energy 298K = -916.883155
Lowest Frequency = 8.0025 cm-1
Second Frequency = 42.9121 cm-1
SCF (BP86-D3BJ) Energy = -917.142477672
SCF (MeCN) Energy = -917.091989194
SCF (Toluene) Energy = -917.083363353
SCF (BS2) Energy = -917.013804146

```

```

Ru 0.25672 0.02914 -0.09363
O 1.40150 0.84278 1.53467
C 1.85571 1.76416 0.75653
C 2.73288 2.87000 1.28088
C -1.02505 -1.83843 0.15046
C -0.59810 -1.34082 1.43752
C -1.57065 -0.69617 2.28559
C -2.87753 -0.53777 1.86833
O 1.49793 1.72569 -0.48223
H 2.10027 3.72426 1.57869
H 3.29198 2.52909 2.16470
H 3.42336 3.21313 0.49593
C -3.30747 -1.05730 0.60518
C -2.41273 -1.70885 -0.22035
H -2.74949 -2.15628 -1.16126
H -3.60327 -0.03885 2.51954
H -0.43094 -2.59871 -0.36734
H -1.25685 -0.34525 3.27404
C -1.54777 1.12182 -1.42143
O -1.36766 1.41656 -0.18261
O -0.81060 0.18084 -1.91843
C -2.53269 1.87078 -2.27903
H -2.83352 1.26043 -3.14286
H -3.41277 2.15384 -1.68239
H -2.06018 2.79636 -2.65149
H 0.31420 -1.73008 1.90354

```

```

H -4.35960 -0.96469 0.31441
N 1.71181 -1.18393 -0.45689
C 2.61542 -1.90135 -0.70401
C 3.73741 -2.75110 -1.08696
H 4.32325 -2.27701 -1.89410
H 4.40964 -2.92799 -0.22959
H 3.37953 -3.72966 -1.45106

```

**1A+**

```

SCF (BP86) Energy = -688.369203652
Enthalpy 0K = -688.172671
Enthalpy 298K = -688.156154
Free Energy 298K = -688.218994
Lowest Frequency = 14.5816 cm-1
Second Frequency = 20.6417 cm-1
SCF (BP86-D3BJ) Energy = -688.418244771
SCF (MeCN) Energy = -688.434832348
SCF (Toluene) Energy = -688.407692434
SCF (BS2) Energy = -688.236303071

```

```

C 1.97900 -0.42422 1.43435
C 2.28864 0.78205 0.70186
C 2.28603 0.77224 -0.71909
C 1.97489 -0.44377 -1.43457
C 1.70483 -1.63847 -0.71220
C 1.70728 -1.62908 0.72964
Ru 0.35148 -0.01553 0.00002
O -0.82251 1.38037 -1.09232
C -1.28684 1.89340 -0.00003
C -2.30737 2.98729 -0.00009
H 2.42145 1.70631 -1.27086
H 1.40689 -2.52383 1.28095
O -0.82236 1.38061 1.09229
H -3.31923 2.54584 -0.00018
H -2.20274 3.60433 0.90434
H -2.20259 3.60439 -0.90447
H 1.89384 -0.39504 2.52381
H 1.40205 -2.54042 -1.25037
H 1.88724 -0.42964 -2.52409
H 2.42658 1.72336 1.24048
N -1.32682 -1.16329 0.00024
C -2.31924 -1.78292 -0.00000
C -3.54858 -2.56142 -0.00010
H -4.12787 -2.34935 0.91401
H -4.15939 -2.29936 -0.88008
H -3.31641 -3.63875 -0.03428

```



## XYZ Coordinates and Computed Energies

## Ru(II) Carboxylate Structures (Figure 8)

**<sup>1</sup>B<sup>+</sup>** (*t*-O, *t*-N)

SCF (BP86) Energy = -1167.72294599  
 Enthalpy 0K = -1167.360368  
 Enthalpy 298K = -1167.333315  
 Free Energy 298K = -1167.417720  
 Lowest Frequency = 34.6334 cm<sup>-1</sup>  
 Second Frequency = 35.6536 cm<sup>-1</sup>  
 SCF (BP86-D3BJ) Energy = -1167.84105962  
 SCF (MeCN) Energy = -1167.77977010  
 SCF (Toluene) Energy = -1167.75581339  
 SCF (BS2) Energy = -1167.69840730

|    |          |          |          |
|----|----------|----------|----------|
| Ru | 0.38913  | -0.31209 | -0.30093 |
| O  | 1.45495  | -2.11947 | -0.83740 |
| C  | 1.36237  | -1.80915 | -2.08272 |
| C  | 1.90602  | -2.68086 | -3.17491 |
| C  | 0.57286  | -1.09144 | 1.90360  |
| C  | 1.91867  | -1.31025 | 2.34945  |
| C  | 2.65967  | -0.26444 | 2.87591  |
| C  | 2.09679  | 1.04283  | 2.98262  |
| O  | 0.73616  | -0.70251 | -2.35687 |
| H  | 2.29835  | -2.06260 | -3.99633 |
| H  | 2.68930  | -3.34313 | -2.77973 |
| H  | 1.09266  | -3.30486 | -3.58475 |
| C  | -2.65477 | -0.05081 | 0.01040  |
| C  | -3.88509 | -0.22327 | 0.67752  |
| C  | -1.82616 | -1.18916 | -0.19278 |
| C  | -4.28335 | -1.49696 | 1.11131  |
| H  | -4.52087 | 0.64173  | 0.89036  |
| C  | -2.23418 | -2.46731 | 0.23514  |
| C  | -3.46237 | -2.61902 | 0.89569  |
| H  | -5.23992 | -1.61349 | 1.62949  |
| H  | -1.59876 | -3.33524 | 0.03297  |
| H  | -3.78486 | -3.60834 | 1.23320  |
| H  | -1.08087 | -1.17411 | -1.05356 |
| C  | 0.79712  | 1.28068  | 2.56419  |
| C  | 0.00632  | 0.21875  | 2.01257  |
| H  | -1.07868 | 0.34826  | 1.97625  |
| H  | 2.68128  | 1.84729  | 3.44124  |
| H  | -0.07791 | -1.96116 | 1.77586  |
| H  | 3.67252  | -0.44726 | 3.25006  |
| C  | -2.15228 | 1.26535  | -0.42012 |
| C  | -2.44395 | 3.57781  | -1.11805 |
| H  | -3.09232 | 4.42725  | -1.35000 |
| C  | -2.99076 | 2.35859  | -0.70797 |
| H  | -4.07363 | 2.23198  | -0.63087 |
| C  | -0.25932 | 2.56721  | -0.94958 |
| H  | 0.82773  | 2.59751  | -1.03850 |
| C  | -1.04927 | 3.68051  | -1.24065 |
| H  | -0.57022 | 4.60768  | -1.56537 |
| N  | -0.78234 | 1.37838  | -0.54499 |
| H  | 2.33449  | -2.32107 | 2.30597  |
| H  | 0.34216  | 2.26658  | 2.70488  |
| N  | 2.11269  | 0.59634  | -0.26213 |
| C  | 3.18150  | 1.07786  | -0.31319 |
| C  | 4.51198  | 1.66943  | -0.36306 |
| H  | 5.25496  | 0.96768  | 0.05182  |
| H  | 4.78966  | 1.89986  | -1.40528 |
| H  | 4.54109  | 2.60195  | 0.22486  |

TS (**<sup>1</sup>B<sup>+</sup>-<sup>1</sup>C<sup>+</sup>**) (*t*-O, *t*-N)

SCF (BP86) Energy = -1167.68769362  
 Enthalpy 0K = -1167.330650  
 Enthalpy 298K = -1167.303913  
 Free Energy 298K = -1167.387313  
 Lowest Frequency = -844.5664 cm<sup>-1</sup>  
 Second Frequency = 27.1368 cm<sup>-1</sup>  
 SCF (BP86-D3BJ) Energy = -1167.80750834  
 SCF (MeCN) Energy = -1167.74353548  
 SCF (Toluene) Energy = -1167.72013087  
 SCF (BS2) Energy = -1167.66167829

|    |          |          |          |
|----|----------|----------|----------|
| Ru | 0.31812  | -0.29543 | -0.12650 |
| O  | 1.04593  | -2.33784 | -0.43548 |
| C  | 0.51405  | -2.52671 | -1.56260 |
| C  | 0.81133  | -3.69059 | -2.45143 |
| C  | 0.77970  | -0.68856 | 2.05279  |
| C  | 2.15210  | -1.03259 | 2.31999  |
| C  | 3.10398  | -0.04206 | 2.47397  |
| C  | 2.74623  | 1.34215  | 2.37178  |
| O  | -0.36413 | -1.61012 | -2.00134 |
| H  | 1.20807  | -3.32826 | -3.41495 |
| H  | 1.53825  | -4.36136 | -1.97482 |
| H  | -0.12225 | -4.23416 | -2.67376 |
| C  | -2.59477 | 0.22607  | 0.13738  |
| C  | -3.94287 | 0.07560  | 0.51834  |
| C  | -1.66543 | -0.85831 | 0.27878  |
| C  | -4.39225 | -1.14744 | 1.03747  |
| H  | -4.64686 | 0.90966  | 0.43039  |
| C  | -2.15405 | -2.07872 | 0.80878  |
| C  | -3.50079 | -2.22460 | 1.18281  |
| H  | -5.43958 | -1.25848 | 1.33369  |
| H  | -1.47224 | -2.93046 | 0.92181  |
| H  | -3.85533 | -3.17678 | 1.59044  |
| H  | -1.01714 | -1.28358 | -1.04366 |
| C  | 1.44097  | 1.70782  | 2.11095  |
| C  | 0.42172  | 0.70050  | 1.92615  |
| H  | -0.62154 | 0.99727  | 2.07635  |
| H  | 3.50764  | 2.10879  | 2.54903  |
| H  | 0.00561  | -1.42866 | 2.27760  |
| H  | 4.13664  | -0.31154 | 2.71946  |
| C  | -2.02923 | 1.47519  | -0.38568 |
| C  | -2.11325 | 3.75196  | -1.24422 |
| H  | -2.68670 | 4.63591  | -1.53749 |
| C  | -2.76627 | 2.61491  | -0.76068 |
| H  | -3.85585 | 2.59610  | -0.68017 |
| C  | -0.02066 | 2.58609  | -0.96966 |
| H  | 1.06701  | 2.51988  | -1.02591 |
| C  | -0.71268 | 3.73767  | -1.34873 |
| H  | -0.15643 | 4.60315  | -1.71733 |
| N  | -0.65198 | 1.47329  | -0.50926 |
| H  | 2.41921  | -2.08548 | 2.45019  |
| H  | 1.15090  | 2.76353  | 2.10364  |
| N  | 2.20486  | 0.32121  | -0.69854 |
| C  | 3.27083  | 0.57916  | -1.11856 |
| C  | 4.59768  | 0.88891  | -1.63651 |
| H  | 5.29828  | 0.07092  | -1.39881 |
| H  | 4.56338  | 1.01591  | -2.73160 |
| H  | 4.97901  | 1.82012  | -1.18551 |

**<sup>1</sup>C<sup>+</sup>** (*t*-O, *t*-N)

SCF (BP86) Energy = -1167.69618736  
 Enthalpy 0K = -1167.334234  
 Enthalpy 298K = -1167.306763  
 Free Energy 298K = -1167.393179  
 Lowest Frequency = 18.7163 cm<sup>-1</sup>  
 Second Frequency = 31.3377 cm<sup>-1</sup>  
 SCF (BP86-D3BJ) Energy = -1167.81435769  
 SCF (MeCN) Energy = -1167.75863580  
 SCF (Toluene) Energy = -1167.73069997  
 SCF (BS2) Energy = -1167.67099141

|    |          |          |          |
|----|----------|----------|----------|
| Ru | -0.29762 | 0.16134  | -0.11291 |
| O  | -1.24784 | 2.09525  | -0.39326 |
| C  | -0.79392 | 2.95122  | -1.19348 |
| C  | -1.59116 | 4.14556  | -1.62642 |
| C  | -0.87114 | 0.59922  | 1.98870  |
| C  | -2.29044 | 0.78118  | 2.19636  |
| C  | -3.11961 | -0.30897 | 2.35088  |
| C  | -2.59044 | -1.64648 | 2.31913  |
| O  | 0.42406  | 2.87325  | -1.73128 |
| H  | -1.62866 | 4.18868  | -2.72738 |
| H  | -2.60564 | 4.09741  | -1.21196 |
| H  | -1.08832 | 5.06669  | -1.28669 |

## XYZ Coordinates and Computed Energies

C 2.61028 -0.10600 0.01986  
 C 3.97139 0.21777 0.19398  
 C 1.56748 0.84043 0.31435  
 C 4.33542 1.47664 0.69223  
 H 4.75534 -0.50920 -0.04429  
 C 1.97897 2.09013 0.84719  
 C 3.33855 2.40860 1.02611  
 H 5.39163 1.72464 0.83135  
 H 1.22726 2.83940 1.12758  
 H 3.61886 3.38616 1.43255  
 H 0.93988 2.17091 -1.23426  
 C -1.24457 -1.86348 2.12259  
 C -0.34161 -0.74521 1.93601  
 H 0.71847 -0.90626 2.16023  
 H -3.26266 -2.49131 2.50214  
 H -0.20230 1.42696 2.24654  
 H -4.18664 -0.16194 2.54758  
 C 2.14171 -1.42083 -0.42801  
 C 2.36741 -3.71981 -1.19857  
 H 2.99751 -4.56074 -1.50270  
 C 2.94895 -2.50568 -0.82133  
 H 4.03521 -2.38792 -0.83191  
 C 0.20295 -2.74374 -0.79129  
 H -0.88735 -2.77630 -0.75248  
 C 0.96795 -3.84508 -1.17872  
 H 0.47128 -4.77796 -1.45643  
 N 0.76402 -1.55534 -0.44003  
 H -2.68677 1.79744 2.27766  
 H -0.83033 -2.87530 2.17646  
 N -2.13481 -0.57196 -0.86282  
 C -3.12757 -0.87750 -1.41302  
 C -4.36475 -1.25330 -2.08654  
 H -5.10152 -0.43586 -2.01485  
 H -4.17387 -1.46305 -3.15245  
 H -4.79554 -2.15618 -1.62237

**<sup>1</sup>B<sup>+</sup>** (*t*-O, *t*-C<sub>6</sub>H<sub>6</sub>)

SCF (BP86) Energy = -1167.71349134  
 Enthalpy 0K = -1167.351221  
 Enthalpy 298K = -1167.324016  
 Free Energy 298K = -1167.409183  
 Lowest Frequency = 30.6796 cm<sup>-1</sup>  
 Second Frequency = 32.7008 cm<sup>-1</sup>  
 SCF (BP86-D3BJ) Energy = -1167.83151821  
 SCF (MeCN) Energy = -1167.77124339  
 SCF (Toluene) Energy = -1167.74671985  
 SCF (BS2) Energy = -1167.68864116

Ru -0.42558 0.00216 -0.14150  
 O -1.81753 1.59465 -0.43850  
 C -1.99935 1.25643 -1.66745  
 C -2.92923 2.00624 -2.57578  
 C -1.80941 -1.36197 1.21976  
 C -2.59698 -0.59318 2.14148  
 C -3.81921 -0.06535 1.75718  
 C -4.32580 -0.31003 0.45057  
 O -1.34169 0.21630 -2.08206  
 H -3.93067 1.54430 -2.53143  
 H -3.02017 3.05306 -2.25150  
 H -2.57618 1.95092 -3.61613  
 C 2.53779 0.42494 -0.49721  
 C 3.74641 1.03883 -0.11588  
 C 1.41688 1.25221 -0.79479  
 C 3.83190 2.43855 -0.03955  
 H 4.61399 0.42983 0.15669  
 C 1.50513 2.65748 -0.70612  
 C 2.71590 3.24969 -0.32429  
 H 4.77786 2.90223 0.25733  
 H 0.63165 3.26979 -0.94689  
 H 2.79840 4.33842 -0.25547  
 H 0.63689 0.83250 -1.49951  
 C -3.58994 -1.05468 -0.46201

## Ru(II) Carboxylate Structures (Figure 8)

C -2.31437 -1.57698 -0.09775  
 H -1.85247 -2.29940 -0.77546  
 H -5.31453 0.07201 0.17677  
 H -1.01086 -1.99484 1.62016  
 H -4.41572 0.51287 2.46925  
 C 2.34412 -1.03446 -0.52568  
 C 3.15866 -3.31779 -0.74136  
 H 3.97523 -4.02683 -0.90286  
 C 3.40195 -1.94187 -0.72243  
 H 4.41070 -1.55306 -0.88371  
 C 0.82669 -2.82043 -0.37154  
 H -0.20413 -3.14570 -0.22286  
 C 1.84057 -3.76212 -0.55780  
 H 1.58787 -4.82553 -0.56171  
 N 1.04355 -1.47681 -0.35892  
 H -2.23557 -0.45644 3.16497  
 H -3.98971 -1.27502 -1.45598  
 N 0.29866 0.38892 1.65593  
 C 0.73692 0.70217 2.69920  
 C 1.24921 1.13652 3.99330  
 H 0.65236 1.98239 4.37490  
 H 1.20345 0.31327 4.72560  
 H 2.29825 1.46246 3.89805

TS (**<sup>1</sup>B<sup>+</sup>-<sup>1</sup>C<sup>+</sup>**) (*t*-O, *t*-C<sub>6</sub>H<sub>6</sub>)

SCF (BP86) Energy = -1167.68971637  
 Enthalpy 0K = -1167.332733  
 Enthalpy 298K = -1167.305764  
 Free Energy 298K = -1167.390367  
 Lowest Frequency = -1005.5325 cm<sup>-1</sup>  
 Second Frequency = 19.5884 cm<sup>-1</sup>  
 SCF (BP86-D3BJ) Energy = -1167.80768527  
 SCF (MeCN) Energy = -1167.74528082  
 SCF (Toluene) Energy = -1167.72200053  
 SCF (BS2) Energy = -1167.66414526

Ru -0.33741 -0.01695 0.08001  
 O -1.75618 1.59931 0.23340  
 C -1.68187 1.99128 -0.96596  
 C -2.56165 3.04250 -1.56136  
 C -2.15204 -1.73246 0.48706  
 C -3.20855 -1.18456 1.26590  
 C -4.24398 -0.47927 0.65353  
 C -4.25540 -0.31336 -0.75141  
 O -0.75149 1.41993 -1.74231  
 H -3.11232 2.62229 -2.41915  
 H -3.26812 3.42093 -0.81081  
 H -1.94114 3.86676 -1.95173  
 C 2.50679 0.63107 -0.40565  
 C 3.72694 1.33356 -0.37304  
 C 1.29510 1.27042 0.01787  
 C 3.76589 2.65462 0.09789  
 H 4.65851 0.85245 -0.68792  
 C 1.37034 2.59263 0.52514  
 C 2.59353 3.28090 0.55742  
 H 4.71852 3.19230 0.12047  
 H 0.45898 3.08693 0.87855  
 H 2.63448 4.30494 0.94210  
 H 0.28268 1.37428 -1.02515  
 C -3.22095 -0.83264 -1.53202  
 C -2.15110 -1.53914 -0.92089  
 H -1.44591 -2.07267 -1.56473  
 H -5.09330 0.20517 -1.22876  
 H -1.46411 -2.44106 0.95838  
 H -5.06262 -0.07542 1.25678  
 C 2.38665 -0.78641 -0.76278  
 C 3.23848 -2.94362 -1.50521  
 H 4.04665 -3.55842 -1.91117  
 C 3.42898 -1.57771 -1.28216  
 H 4.39107 -1.11147 -1.50799  
 C 0.98495 -2.67934 -0.69120  
 H 0.00779 -3.09060 -0.43186

## XYZ Coordinates and Computed Energies

## Ru(II) Carboxylate Structures (Figure 8)

C 1.99411 -3.50834 -1.18498  
 H 1.79584 -4.57508 -1.31595  
 N 1.14366 -1.34096 -0.50774  
 H -3.22190 -1.35135 2.34735  
 H -3.24234 -0.73135 -2.62147  
 N 0.06489 -0.40417 1.92555  
 C 0.34748 -0.57951 3.05265  
 C 0.67351 -0.75803 4.46224  
 H -0.01215 -0.16450 5.09059  
 H 0.58784 -1.81877 4.75189  
 H 1.70593 -0.42325 4.65872

**<sup>1</sup>C<sup>+</sup>** (*t*-O, *t*-C<sub>6</sub>H<sub>6</sub>)

SCF (BP86) Energy = -1167.72465820  
 Enthalpy 0K = -1167.362087  
 Enthalpy 298K = -1167.334562  
 Free Energy 298K = -1167.421173  
 Lowest Frequency = 22.4661 cm<sup>-1</sup>  
 Second Frequency = 30.7549 cm<sup>-1</sup>  
 SCF (BP86-D3BJ) Energy = -1167.84257878  
 SCF (MeCN) Energy = -1167.78315921  
 SCF (Toluene) Energy = -1167.75798196  
 SCF (BS2) Energy = -1167.69989919

Ru -0.29339 -0.36696 0.25964  
 O -2.32477 0.25795 0.54126  
 C -2.75394 1.39532 0.84699  
 C -4.17619 1.63264 1.26110  
 C -1.76770 -2.99872 -0.07342  
 C -3.08510 -2.67700 -0.39506  
 C -3.36820 -1.75819 -1.43878  
 C -2.32807 -1.14670 -2.13361  
 O -1.99710 2.49414 0.81829  
 H -4.71554 0.67965 1.32239  
 H -4.20311 2.14849 2.23490  
 H -4.66842 2.29743 0.53136  
 C 1.93932 0.94379 -1.08911  
 C 2.62960 1.87367 -1.89804  
 C 0.51640 1.00419 -0.95947  
 C 1.92419 2.85728 -2.59988  
 H 3.72001 1.82313 -1.99016  
 C -0.17812 1.97563 -1.71417  
 C 0.52144 2.89717 -2.51729  
 H 2.46069 3.57735 -3.22416  
 H -1.27305 2.00929 -1.70881  
 H -0.03924 3.64512 -3.08812  
 H -1.10080 2.23942 0.47372  
 C -0.96954 -1.43004 -1.80372  
 C -0.68294 -2.38886 -0.78130  
 H 0.30743 -2.85175 -0.73610  
 H -2.54389 -0.46732 -2.96456  
 H -1.55740 -3.76609 0.67882  
 H -4.40748 -1.55232 -1.71275  
 C 2.57252 -0.16557 -0.38161  
 C 4.40916 -1.56221 0.39085  
 H 5.47891 -1.78577 0.43775  
 C 3.95156 -0.45111 -0.32154  
 H 4.65781 0.20628 -0.83493  
 C 2.12173 -2.06061 0.96068  
 H 1.35478 -2.65921 1.46177  
 C 3.47682 -2.38376 1.04936  
 H 3.78776 -3.26038 1.62282  
 N 1.66882 -0.98806 0.25964  
 H -3.90898 -3.16573 0.13485  
 H -0.17891 -1.10327 -2.48472  
 N 0.21090 0.67331 1.85058  
 C 0.56782 1.22562 2.82723  
 C 0.98865 1.89907 4.04835  
 H 0.43202 2.84268 4.17833  
 H 0.80103 1.25603 4.92521  
 H 2.06621 2.13013 4.00510

**<sup>1</sup>B<sup>+</sup>** (*t*-O, *t*-O)

SCF (BP86) Energy = -1167.71744568  
 Enthalpy 0K = -1167.355100  
 Enthalpy 298K = -1167.327720  
 Free Energy 298K = -1167.414767  
 Lowest Frequency = 20.6209 cm<sup>-1</sup>  
 Second Frequency = 21.5538 cm<sup>-1</sup>  
 SCF (BP86-D3BJ) Energy = -1167.83491764  
 SCF (MeCN) Energy = -1167.77357241  
 SCF (Toluene) Energy = -1167.75010664  
 SCF (BS2) Energy = -1167.69351956

Ru 0.45795 0.24801 -0.20921  
 O 2.13773 1.19257 0.59431  
 C 2.92405 0.66020 -0.29732  
 C 4.38622 0.99133 -0.33977  
 C 0.93100 -1.20804 1.81094  
 C 0.45576 -2.05251 0.77173  
 C 1.36617 -2.91217 0.08974  
 C 2.70806 -2.93441 0.45090  
 O 2.36631 -0.14016 -1.13071  
 H 4.62349 1.50009 -1.28898  
 H 4.66428 1.63777 0.50403  
 H 4.97488 0.06060 -0.31111  
 C -2.54023 -0.65286 -0.27279  
 C -3.61451 -1.56766 -0.21951  
 C -1.51045 -0.88606 -1.22227  
 C -3.66792 -2.66068 -1.09732  
 H -4.39769 -1.44960 0.53548  
 C -1.56145 -1.98315 -2.09891  
 C -2.64530 -2.87299 -2.03833  
 H -4.50869 -3.35821 -1.03689  
 H -0.76239 -2.12422 -2.83293  
 H -2.69427 -3.72586 -2.72182  
 H -0.78647 -0.07303 -1.54947  
 C 3.17628 -2.11087 1.50874  
 C 2.30570 -1.25742 2.17999  
 H 2.66286 -0.64194 3.01051  
 H 3.40271 -3.60860 -0.05951  
 H 0.22452 -0.68556 2.46221  
 H 0.99081 -3.57801 -0.69308  
 C -2.41060 0.45892 0.68888  
 C -3.29010 2.04389 2.31392  
 H -4.13335 2.47617 2.85991  
 C -3.49799 1.01248 1.39315  
 H -4.50661 0.63963 1.19833  
 C -0.93988 1.94877 1.78390  
 H 0.09702 2.28126 1.88943  
 C -1.98323 2.51738 2.51649  
 H -1.76814 3.32099 3.22533  
 N -1.13705 0.94132 0.89032  
 H -0.61567 -2.22562 0.65949  
 H 4.22621 -2.16957 1.81414  
 N 0.33062 1.84359 -1.34453  
 C 0.30260 2.80589 -2.01651  
 C 0.26995 3.99166 -2.86210  
 H 0.80940 4.82149 -2.37547  
 H 0.74747 3.78065 -3.83382  
 H -0.77212 4.30526 -3.04087

**<sup>1</sup>B<sup>+</sup>** (*t*-C<sub>6</sub>H<sub>6</sub>, *t*-O)

SCF (BP86) Energy = -1167.72161570  
 Enthalpy 0K = -1167.358734  
 Enthalpy 298K = -1167.331363  
 Free Energy 298K = -1167.417585  
 Lowest Frequency = 21.7265 cm<sup>-1</sup>  
 Second Frequency = 28.6031 cm<sup>-1</sup>  
 SCF (BP86-D3BJ) Energy = =  
 SCF (MeCN) Energy = =  
 SCF (Toluene) Energy = -1167.75425489  
 SCF (BS2) Energy = =

## XYZ Coordinates and Computed Energies

## Ru(II) Carboxylate Structures (Figure 8)

Ru -0.29300 -0.16535 0.18402  
 O -1.25858 -1.93542 0.70640  
 C -1.74137 -2.07331 -0.49625  
 C -2.60966 -3.23664 -0.86379  
 C -2.24315 0.75084 1.34752  
 C -1.85309 1.67946 0.33731  
 C -2.68877 1.83881 -0.81220  
 C -3.84576 1.08642 -0.95635  
 O -1.41837 -1.14641 -1.32772  
 H -2.28971 -3.65484 -1.83119  
 H -2.57583 -4.00864 -0.08199  
 H -3.65024 -2.88976 -0.97928  
 C 1.91916 0.93876 -0.90024  
 C 2.63660 2.02392 -0.33578  
 C 0.77955 1.19457 -1.72525  
 C 2.22459 3.33637 -0.57273  
 H 3.51452 1.82073 0.28563  
 C 0.40551 2.53941 -1.97885  
 C 1.10394 3.59699 -1.39476  
 H 2.78383 4.16926 -0.13513  
 H -0.41444 2.73917 -2.67437  
 H 0.80971 4.63048 -1.60152  
 H 0.35385 0.39516 -2.33925  
 C -4.23155 0.16361 0.05439  
 C -3.45257 0.00558 1.19290  
 H -3.77120 -0.66447 1.99672  
 H -4.48475 1.22744 -1.83358  
 H -1.77430 0.77893 2.33409  
 H -2.43031 2.59105 -1.56257  
 C 2.37028 -0.46570 -0.72335  
 C 3.90679 -2.32756 -0.75786  
 H 4.90115 -2.74220 -0.94654  
 C 3.65813 -0.96062 -0.96125  
 H 4.43858 -0.28348 -1.31898  
 C 1.59973 -2.59755 -0.07629  
 H 0.75869 -3.17962 0.30682  
 C 2.86199 -3.15354 -0.31516  
 H 3.01647 -4.22206 -0.14462  
 N 1.36655 -1.27751 -0.27851  
 H -1.09184 2.43760 0.54993  
 H -5.17037 -0.39041 -0.04992  
 N 0.60836 0.39632 1.84408  
 C 1.11823 0.67485 2.86677  
 C 1.72951 1.00003 4.15007  
 H 1.41725 0.27214 4.91821  
 H 2.82932 0.97569 4.07177  
 H 1.42445 2.00821 4.47736

TS (<sup>1</sup>B<sup>+</sup>-<sup>1</sup>C<sup>+</sup>) 1 (*t*-C<sub>6</sub>H<sub>6</sub>, *t*-O)  
 SCF (BP86) Energy = -1167.69108449  
 Enthalpy 0K = -1167.329320  
 Enthalpy 298K = -1167.302354  
 Free Energy 298K = -1167.388168  
 Lowest Frequency = -91.3696 cm<sup>-1</sup>  
 Second Frequency = 23.8225 cm<sup>-1</sup>  
 SCF (BP86-D3BJ) Energy = -1167.80766931  
 SCF (MeCN) Energy = -1167.75184805  
 SCF (Toluene) Energy = -1167.72541215  
 SCF (BS2) Energy = -1167.66737436

C 2.90523 -0.37778 -0.31224  
 N 1.76673 0.34486 -0.15008  
 C 1.82303 1.71390 -0.11501  
 C 3.05632 2.38019 -0.20973  
 C 4.23434 1.63812 -0.36035  
 C 4.15476 0.23753 -0.42332  
 Ru -0.06980 -0.49386 0.21027  
 C -2.94686 -1.57842 -0.80545  
 C -2.05871 -1.84101 0.27882  
 C -2.13432 -1.02156 1.44581  
 C -3.12437 0.00083 1.53146  
 C -4.01016 0.20437 0.47644

C -3.90879 -0.57401 -0.70424  
 H -1.62841 -1.33005 2.36521  
 C 0.51161 2.38319 -0.01441  
 C 0.34669 3.62192 0.63927  
 C -0.90617 4.25064 0.64933  
 C -2.00653 3.65714 0.00246  
 C -1.85877 2.41985 -0.63879  
 C -0.61582 1.75561 -0.62816  
 H -4.61172 -0.40897 -1.52686  
 O 0.52089 -2.00295 -1.00574  
 C 0.26250 -1.72120 -2.28101  
 O -0.28679 -0.66337 -2.63775  
 C 0.68992 -2.80622 -3.25001  
 H 1.36817 -2.36907 -4.00054  
 H 1.18534 -3.64589 -2.74238  
 H -0.19744 -3.17561 -3.78963  
 H 1.19727 4.08900 1.14582  
 H -1.02359 5.21354 1.15574  
 H -2.69891 1.96586 -1.16945  
 H -2.97347 4.16926 -0.00962  
 H 3.07572 3.47291 -0.19362  
 H -0.47044 0.91630 -1.36428  
 H -2.90715 -2.21006 -1.69735  
 H -4.79772 0.96002 0.56151  
 H -1.49988 -2.78073 0.29113  
 H -3.21487 0.58450 2.45269  
 H 5.04688 -0.37862 -0.56106  
 H 5.19947 2.14579 -0.44433  
 H 2.77061 -1.46068 -0.35863  
 N 0.68400 -1.54381 1.63134  
 C 1.18408 -2.18179 2.48399  
 C 1.79465 -2.96120 3.55364  
 H 2.75407 -3.38758 3.21520  
 H 1.98300 -2.32682 4.43653  
 H 1.13047 -3.79069 3.84993

INT (<sup>1</sup>B<sup>+</sup>-<sup>1</sup>C<sup>+</sup>) (*t*-C<sub>6</sub>H<sub>6</sub>, *t*-O)  
 SCF (BP86) Energy = -1167.68848672  
 Enthalpy 0K = -1167.328946  
 Enthalpy 298K = -1167.301412  
 Free Energy 298K = -1167.388459  
 Lowest Frequency = 19.9654 cm<sup>-1</sup>  
 Second Frequency = 25.7067 cm<sup>-1</sup>  
 SCF (BP86-D3BJ) Energy = -1167.80874890  
 SCF (MeCN) Energy = -1167.75404375  
 SCF (Toluene) Energy = -1167.72465319  
 SCF (BS2) Energy = -1167.66542208

C 1.64481 -1.41816 -1.65674  
 N 0.54143 -1.01832 -0.96576  
 C -0.65636 -1.68931 -1.13446  
 C -0.73398 -2.74840 -2.06009  
 C 0.38960 -3.13851 -2.79150  
 C 1.60404 -2.46535 -2.57654  
 Ru 0.62056 0.47928 0.36017  
 C -1.44778 3.05905 0.62629  
 C -0.27300 2.65924 -0.07087  
 C -0.38934 1.99229 -1.33315  
 C -1.68616 1.72552 -1.85347  
 C -2.82553 2.11501 -1.15084  
 C -2.70575 2.78469 0.09123  
 H 0.47193 1.90842 -2.00149  
 C -1.74805 -1.23684 -0.27418  
 C -3.09585 -1.60003 -0.46114  
 C -4.07472 -1.14369 0.43246  
 C -3.71814 -0.31973 1.51580  
 C -2.38130 0.06162 1.70088  
 C -1.37797 -0.37285 0.80451  
 H -3.60692 3.11220 0.61866  
 O 1.95670 -0.56797 1.49294  
 C 1.53492 -1.46850 2.37274  
 O 0.33522 -1.75762 2.54700

## XYZ Coordinates and Computed Energies

## Ru(II) Carboxylate Structures (Figure 8)

C 2.65073 -2.14371 3.14684  
H 2.96674 -3.04803 2.59871  
H 3.52293 -1.48263 3.25027  
H 2.27926 -2.45385 4.13350  
H -3.39098 -2.22988 -1.30639  
H -5.11826 -1.44036 0.29034  
H -2.10083 0.66214 2.57156  
H -4.48274 0.01163 2.22543  
H -1.68342 -3.27617 -2.17788  
H -0.38782 -0.70864 1.42569  
H -1.35354 3.61555 1.56408  
H -3.81768 1.92930 -1.57263  
H 0.68093 3.11684 0.22182  
H -1.78266 1.26042 -2.83966  
H 2.51858 -2.74794 -3.10377  
H 0.32678 -3.96516 -3.50456  
H 2.56235 -0.87029 -1.44192  
N 2.32454 1.33325 -0.30042  
C 3.33654 1.85308 -0.59116  
C 4.60204 2.48752 -0.93489  
H 4.71985 2.54746 -2.02974  
H 4.64103 3.50841 -0.51912  
H 5.44015 1.90498 -0.51702

TS ( ${}^1\mathbf{B}^+ - {}^1\mathbf{C}^+$ )<sub>2</sub> (*t*-C<sub>6</sub>H<sub>6</sub>, *t*-O)

SCF (BP86) Energy = -1167.68832136  
Enthalpy 0K = -1167.330581  
Enthalpy 298K = -1167.303609  
Free Energy 298K = -1167.389004  
Lowest Frequency = -240.3499 cm<sup>-1</sup>  
Second Frequency = 20.8773 cm<sup>-1</sup>  
SCF (BP86-D3BJ) Energy = -1167.80894582  
SCF (MeCN) Energy = -1167.75245138  
SCF (Toluene) Energy = -1167.72386138  
SCF (BS2) Energy = -1167.66463484

C 1.60758 -1.40774 -1.69698  
N 0.51795 -1.00290 -0.98796  
C -0.69791 -1.63832 -1.16986  
C -0.80541 -2.66767 -2.12596  
C 0.30535 -3.06393 -2.87335  
C 1.53732 -2.42714 -2.64589  
Ru 0.63102 0.46048 0.37334  
C -1.38173 3.07778 0.63456  
C -0.19831 2.66307 -0.03868  
C -0.29662 2.01174 -1.31083  
C -1.58625 1.77556 -1.86465  
C -2.73426 2.17628 -1.18360  
C -2.63156 2.83048 0.06852  
H 0.57765 1.92421 -1.96157  
C -1.76906 -1.17730 -0.28994  
C -3.12435 -1.52150 -0.45610  
C -4.08069 -1.05547 0.45651  
C -3.69111 -0.24230 1.53680  
C -2.34556 0.11826 1.69922  
C -1.35560 -0.32764 0.78890  
H -3.53890 3.16752 0.57901  
O 1.91724 -0.67477 1.49574  
C 1.43256 -1.56741 2.33135  
O 0.20249 -1.78877 2.46125  
C 2.45755 -2.33632 3.13574  
H 2.51438 -3.36644 2.74493  
H 3.45040 -1.87142 3.07183  
H 2.12792 -2.39958 4.18370  
H -3.44355 -2.14369 -1.29854  
H -5.13110 -1.33538 0.33199  
H -2.04647 0.71427 2.56754  
H -4.43824 0.09966 2.26013  
H -1.76878 -3.16643 -2.25683  
H -0.39931 -0.80656 1.46984  
H -1.29966 3.62266 1.58031  
H -3.71961 2.01244 -1.62975

H 0.75755 3.09753 0.28185  
H -1.66800 1.32437 -2.85861  
H 2.44175 -2.71590 -3.18700  
H 0.21895 -3.86713 -3.61041  
H 2.53829 -0.88570 -1.47338  
N 2.38774 1.28639 -0.23452  
C 3.41964 1.78564 -0.49065  
C 4.70895 2.39380 -0.79151  
H 4.83979 2.50438 -1.88091  
H 4.77758 3.39083 -0.32480  
H 5.52350 1.76375 -0.39666

 ${}^1\mathbf{C}^+$  (*t*-C<sub>6</sub>H<sub>6</sub>, *t*-O)

SCF (BP86) Energy = -1167.70548939  
Enthalpy 0K = -1167.343933  
Enthalpy 298K = -1167.316334  
Free Energy 298K = -1167.403907  
Lowest Frequency = 15.4518 cm<sup>-1</sup>  
Second Frequency = 25.6287 cm<sup>-1</sup>  
SCF (BP86-D3BJ) Energy = -1167.82603599  
SCF (MeCN) Energy = -1167.76600865  
SCF (Toluene) Energy = -1167.73940155  
SCF (BS2) Energy = -1167.68120831

C -1.16821 -0.64425 2.32558  
N -0.23062 -0.48890 1.35256  
C 1.07763 -0.88368 1.57914  
C 1.42628 -1.42869 2.83181  
C 0.46534 -1.58151 3.83273  
C -0.85973 -1.18746 3.57249  
Ru -0.66527 0.29587 -0.43917  
C 0.85747 2.96859 -1.41404  
C -0.34950 2.54932 -0.77617  
C -0.36947 2.35296 0.64785  
C 0.84345 2.55339 1.38199  
C 2.01550 2.92046 0.73205  
C 2.02148 3.13745 -0.67184  
H -1.31540 2.36581 1.19682  
C 1.95434 -0.69939 0.42841  
C 3.32048 -1.05233 0.39904  
C 4.05790 -0.88454 -0.77968  
C 3.42889 -0.37190 -1.92917  
C 2.07016 -0.00356 -1.89733  
C 1.29012 -0.14472 -0.71982  
H 2.94232 3.46369 -1.16476  
O -1.44548 -1.56851 -1.05272  
C -0.89071 -2.59572 -1.53663  
O 0.40458 -2.70819 -1.75258  
C -1.70550 -3.79608 -1.92436  
H -1.31678 -4.68920 -1.40837  
H -2.76124 -3.64028 -1.67108  
H -1.60010 -3.97743 -3.00712  
H 3.81159 -1.46651 1.28660  
H 5.11526 -1.16324 -0.80850  
H 1.61198 0.40566 -2.80622  
H 4.00105 -0.25160 -2.85541  
H 2.46150 -1.73332 3.00541  
H 0.85805 -1.84468 -1.48918  
H 0.85076 3.17983 -2.48811  
H 2.93177 3.08448 1.30747  
H -1.29773 2.68006 -1.31765  
H 0.82601 2.46700 2.47324  
H -1.64911 -1.29637 4.32022  
H 0.74023 -2.00534 4.80284  
H -2.17655 -0.31879 2.06331  
N -2.74584 0.73222 -0.22708  
C -3.89970 0.95686 -0.24737  
C -5.33218 1.22573 -0.28111  
H -5.56653 2.13256 0.30077  
H -5.66669 1.37778 -1.32112  
H -5.89001 0.37631 0.14723

## XYZ Coordinates and Computed Energies

## Ru(II) Carboxylate Structures (Figure 8)

**<sup>1</sup>B<sup>+</sup>** (*t*-N,*t*-O)

SCF (BP86) Energy = -1167.72106216  
 Enthalpy 0K = -1167.358285  
 Enthalpy 298K = -1167.330997  
 Free Energy 298K = -1167.416737  
 Lowest Frequency = 22.3268 cm<sup>-1</sup>  
 Second Frequency = 25.8824 cm<sup>-1</sup>  
 SCF (BP86-D3BJ) Energy = -1167.84260003  
 SCF (MeCN) Energy = -1167.77625682  
 SCF (Toluene) Energy = -1167.75323488  
 SCF (BS2) Energy = -1167.69612388

Ru -0.61908 -0.25270 -0.02815  
 O -1.13757 -2.28328 0.02042  
 C -1.43997 -2.28641 -1.24154  
 C -1.97443 -3.50840 -1.92164  
 C -0.51821 -0.51883 2.26218  
 C 0.35109 -1.57330 2.70811  
 C 1.70087 -1.33907 2.89904  
 C 2.24178 -0.03279 2.69462  
 O -1.27160 -1.16549 -1.85525  
 H -1.61898 -3.54836 -2.96232  
 H -1.67484 -4.41474 -1.37553  
 H -3.07734 -3.46389 -1.94175  
 C 1.16670 1.66682 -0.96689  
 C 1.63474 2.86211 -0.37550  
 C -0.15364 1.62846 -1.52350  
 C 0.79686 3.97850 -0.27916  
 H 2.65211 2.90070 0.02612  
 C -0.98807 2.77322 -1.40175  
 C -0.52938 3.92593 -0.76187  
 H 1.17210 4.89832 0.18056  
 H -1.98089 2.75411 -1.86163  
 H -1.17615 4.80421 -0.67528  
 H -0.40600 0.87354 -2.27356  
 C 1.42399 1.00365 2.28094  
 C 0.02851 0.78480 2.01352  
 H -0.63159 1.65711 1.95500  
 H 3.29683 0.15548 2.91769  
 H -1.59218 -0.64586 2.42518  
 H 2.35143 -2.14104 3.26307  
 C 2.00128 0.43895 -0.99132  
 C 4.00618 -0.86319 -1.35194  
 H 5.05140 -0.93949 -1.66507  
 C 3.34577 0.37461 -1.38062  
 H 3.85160 1.28153 -1.72324  
 C 1.96813 -1.86910 -0.52673  
 H 1.37809 -2.71279 -0.16120  
 C 3.30364 -1.99990 -0.92383  
 H 3.78060 -2.98281 -0.88947  
 N 1.33023 -0.67334 -0.55480  
 H -0.08210 -2.55221 2.93394  
 H 1.82268 2.01846 2.20030  
 N -2.51919 0.25892 0.32790  
 C -3.64993 0.51543 0.51484  
 C -5.05227 0.84854 0.73337  
 H -5.14036 1.80972 1.26702  
 H -5.57944 0.93163 -0.23193  
 H -5.54308 0.06594 1.33576

TS (**<sup>1</sup>B<sup>+</sup>-<sup>1</sup>C<sup>+</sup>**) (*t*-N,*t*-O)

SCF (BP86) Energy = -1167.69403568  
 Enthalpy 0K = -1167.333210  
 Enthalpy 298K = -1167.306433  
 Free Energy 298K = -1167.391158  
 Lowest Frequency = -115.9398 cm<sup>-1</sup>  
 Second Frequency = 24.5883 cm<sup>-1</sup>  
 SCF (BP86-D3BJ) Energy = -1167.81164970  
 SCF (MeCN) Energy = -1167.75221893  
 SCF (Toluene) Energy = -1167.72769431  
 SCF (BS2) Energy = -1167.67084546

C -2.14377 -1.32936 0.86487  
 N -1.43885 -0.23236 0.49145  
 C -2.03126 1.00588 0.56476  
 C -3.37970 1.14344 0.93057  
 C -4.11761 0.00360 1.27539  
 C -3.48210 -1.24817 1.26234  
 Ru 0.54178 -0.17601 -0.13007  
 C 0.60988 -1.93878 -1.64835  
 C -0.40960 -2.94075 -1.52420  
 C -1.68521 -2.72226 -2.02260  
 C -1.99971 -1.49653 -2.68296  
 C -1.03735 -0.50862 -2.83313  
 C 0.28823 -0.70504 -2.31778  
 H -2.44545 -3.50621 -1.95049  
 C -1.11054 2.12405 0.29005  
 C -1.51393 3.33412 -0.30845  
 C -0.57747 4.35111 -0.54523  
 C 0.77555 4.17910 -0.19043  
 C 1.19820 2.98553 0.40679  
 C 0.27238 1.93709 0.62708  
 H 1.09474 -0.07240 -2.70858  
 O 0.92752 -1.75210 1.08504  
 C 1.24877 -1.36495 2.31729  
 O 1.27399 -0.17336 2.67602  
 C 1.59958 -2.51464 3.24179  
 H 1.08199 -2.37272 4.20327  
 H 1.33813 -3.49093 2.80951  
 H 2.68375 -2.49077 3.44323  
 H -2.55833 3.47282 -0.60611  
 H -0.90323 5.28645 -1.01034  
 H 2.23664 2.85774 0.72538  
 H 1.49274 4.98611 -0.36831  
 H -3.82522 2.14053 0.97992  
 H 0.56711 1.14691 1.40607  
 H 1.65104 -2.24112 -1.51000  
 H -1.26359 0.40817 -3.38646  
 H -0.14985 -3.90225 -1.07054  
 H -3.00006 -1.35313 -3.10393  
 H -4.01065 -2.15726 1.56040  
 H -5.16516 0.09396 1.57685  
 H -1.59643 -2.27230 0.83741  
 N 2.49421 0.01100 -0.52317  
 C 3.65353 0.08575 -0.69469  
 C 5.09468 0.19922 -0.87899  
 H 5.58145 0.42543 0.08475  
 H 5.50734 -0.74659 -1.26767  
 H 5.32994 1.00663 -1.59255

**<sup>1</sup>C<sup>+</sup>** (*t*-N,*t*-O)

SCF (BP86) Energy = -1167.73105755  
 Enthalpy 0K = -1167.368547  
 Enthalpy 298K = -1167.341278  
 Free Energy 298K = -1167.426913  
 Lowest Frequency = 23.6952 cm<sup>-1</sup>  
 Second Frequency = 33.5991 cm<sup>-1</sup>  
 SCF (BP86-D3BJ) Energy = -1167.85256029  
 SCF (MeCN) Energy = -1167.78934120  
 SCF (Toluene) Energy = -1167.76422473  
 SCF (BS2) Energy = -1167.70680159

C -2.15475 0.11488 -1.87378  
 N -1.40328 -0.18468 -0.78434  
 C -1.84463 -1.14881 0.09657  
 C -3.07969 -1.79195 -0.11573  
 C -3.85455 -1.46795 -1.23306  
 C -3.37984 -0.50197 -2.13667  
 Ru 0.48970 0.57010 -0.41674  
 C -1.35214 3.13919 -0.63482  
 C -2.55131 2.86899 0.01363  
 C -2.55603 2.22185 1.28182  
 C -1.36178 1.86249 1.89076  
 C -0.10521 2.10334 1.24029

## XYZ Coordinates and Computed Energies

## Ru(II) Carboxylate Structures (Figure 8)

```
C -0.10729  2.74933 -0.04371
H -3.50659  2.04914  1.79601
C -0.90267 -1.41835  1.18559
C -1.13161 -2.34588  2.22470
C -0.16809 -2.54985  3.22066
C  1.03545 -1.82475  3.18573
C  1.27909 -0.89090  2.15971
C  0.32609 -0.67805  1.13561
H  0.81215  3.21564 -0.41924
O  1.17859 -0.80203 -1.83401
C  1.75161 -1.91878 -1.72364
O  1.96996 -2.51523 -0.56239
C  2.22991 -2.67307 -2.92900
H  1.66305 -3.61508 -3.01987
H  2.09472 -2.06959 -3.83513
H  3.29034 -2.94520 -2.80321
H -2.06896 -2.91134  2.26124
H -0.35413 -3.27048  4.02205
H  2.21514 -0.32308  2.16063
H  1.79093 -1.97936  3.96337
H -3.42101 -2.55243  0.59108
H  1.57539 -1.95720  0.17322
H -1.34542  3.69270 -1.57974
H  0.80292  2.08369  1.84980
H -3.49877  3.18687 -0.43327
H -1.36410  1.42854  2.89528
H -3.94457 -0.22597 -3.03054
H -4.81238 -1.96799 -1.40404
H -1.74179  0.87555 -2.54171
N  2.37041  1.15331 -0.11037
C  3.48630  1.51147  0.00658
C  4.87303  1.93911  0.14531
H  5.51729  1.08075  0.40098
H  5.23519  2.38096 -0.79855
H  4.96427  2.69530  0.94309
```

## XYZ Coordinates and Computed Energies

## Ru(II) Carboxylate Structures (Figures 9 and 10)

**<sup>4</sup>G<sup>+</sup>** ( $\kappa^1$ )

SCF (BP86) Energy = -1333.81273065  
 Enthalpy 0K = -1333.411050  
 Enthalpy 298K = -1333.374809  
 Free Energy 298K = -1333.485025  
 Lowest Frequency = 9.4832 cm<sup>-1</sup>  
 Second Frequency = 16.5330 cm<sup>-1</sup>  
 SCF (BP86-D3BJ) Energy = -1333.93437337  
 SCF (MeCN) Energy = -1333.87498497  
 SCF (Toluene) Energy = -1333.84744571  
 SCF (BS2) Energy = -1333.85086793

|    |          |          |          |
|----|----------|----------|----------|
| N  | -2.14833 | -1.66299 | -0.65023 |
| C  | -2.96908 | -2.47395 | -0.85076 |
| N  | -1.76481 | 0.96345  | -1.54307 |
| C  | -2.35908 | 1.62624  | -2.30512 |
| C  | -3.10493 | 2.45420  | -3.24457 |
| H  | -3.27091 | 1.91006  | -4.18924 |
| H  | -4.08447 | 2.72610  | -2.81693 |
| H  | -2.54732 | 3.37954  | -3.46549 |
| C  | -4.00356 | -3.47390 | -1.08606 |
| H  | -3.56026 | -4.48175 | -1.14503 |
| H  | -4.73880 | -3.45822 | -0.26420 |
| H  | -4.52997 | -3.26578 | -2.03234 |
| O  | -0.79106 | 0.46059  | 2.95486  |
| C  | -1.91951 | 0.57835  | 2.45804  |
| C  | -3.14901 | 0.90928  | 3.30708  |
| H  | -3.72855 | -0.01290 | 3.48670  |
| H  | -2.83336 | 1.32000  | 4.27636  |
| H  | -3.81536 | 1.61755  | 2.79041  |
| O  | -2.22837 | 0.43328  | 1.16995  |
| N  | -0.05138 | -1.48430 | 1.10689  |
| C  | 0.26895  | -2.30359 | 1.87718  |
| C  | 0.67167  | -3.23506 | 2.92097  |
| H  | 1.72506  | -3.53172 | 2.78691  |
| H  | 0.55634  | -2.75083 | 3.90561  |
| H  | 0.04613  | -4.14248 | 2.89593  |
| N  | 0.38105  | 1.50312  | 0.23972  |
| C  | -0.37476 | 2.61576  | 0.47592  |
| C  | 1.73978  | 1.66499  | 0.16066  |
| C  | 0.15091  | 3.90301  | 0.58423  |
| H  | -1.44448 | 2.42744  | 0.58606  |
| C  | 2.31978  | 2.94991  | 0.22898  |
| C  | 1.53110  | 4.08487  | 0.43162  |
| H  | -0.52273 | 4.74065  | 0.78346  |
| H  | 3.40795  | 3.02577  | 0.15783  |
| H  | 1.98524  | 5.07826  | 0.49469  |
| C  | 2.67967  | 0.50785  | 0.08756  |
| C  | 3.56757  | 0.37954  | -1.00259 |
| C  | 2.82839  | -0.34472 | 1.20139  |
| C  | 4.56026  | -0.61316 | -0.99805 |
| H  | 3.48204  | 1.06865  | -1.85019 |
| C  | 3.82993  | -1.32855 | 1.20631  |
| H  | 2.17797  | -0.19987 | 2.06864  |
| C  | 4.69118  | -1.47254 | 0.10634  |
| H  | 5.25164  | -0.69637 | -1.84357 |
| H  | 3.96146  | -1.96557 | 2.08751  |
| H  | 5.47918  | -2.23216 | 0.12041  |
| Ru | -0.83313 | -0.21796 | -0.22284 |
| N  | 0.39387  | -0.89085 | -1.66499 |
| C  | 1.06044  | -1.34774 | -2.51525 |
| C  | 1.92633  | -1.90702 | -3.54536 |
| H  | 2.97775  | -1.83732 | -3.21889 |
| H  | 1.68001  | -2.96690 | -3.72483 |
| H  | 1.80957  | -1.35438 | -4.49253 |

**<sup>3</sup>G** ( $2\kappa^1$ )

SCF (BP86) Energy = -1429.71423530  
 Enthalpy 0K = -1429.309801  
 Enthalpy 298K = -1429.272739  
 Free Energy 298K = -1429.382864  
 Lowest Frequency = 18.7966 cm<sup>-1</sup>

Second Frequency = 29.6347 cm<sup>-1</sup>

SCF (BP86-D3BJ) Energy = -1429.83953150  
 SCF (MeCN) Energy = -1429.74439008  
 SCF (Toluene) Energy = -1429.72764261  
 SCF (BS2) Energy = -1429.79512584

|    |          |          |          |
|----|----------|----------|----------|
| N  | -0.75508 | 0.82633  | 1.34184  |
| C  | -1.55069 | 1.29558  | 2.06574  |
| N  | 1.70198  | 1.85610  | 0.56963  |
| C  | 2.31375  | 2.83062  | 0.78467  |
| C  | -2.58642 | 1.92909  | 2.87051  |
| H  | -2.72089 | 2.97454  | 2.54327  |
| H  | -3.54305 | 1.39538  | 2.74003  |
| H  | -2.31817 | 1.92551  | 3.94062  |
| C  | 2.96648  | 4.11949  | 0.96995  |
| H  | 3.16913  | 4.31028  | 2.03714  |
| H  | 3.92288  | 4.15393  | 0.42168  |
| H  | 2.30680  | 4.91627  | 0.58515  |
| O  | 3.60793  | -1.58875 | -0.27666 |
| C  | 3.28675  | -0.79648 | -1.18965 |
| O  | 2.16126  | -0.13549 | -1.30561 |
| C  | 4.24520  | -0.52171 | -2.35770 |
| H  | 3.70640  | -0.56166 | -3.31786 |
| H  | 4.66144  | 0.49628  | -2.26247 |
| H  | 5.07056  | -1.24868 | -2.35289 |
| O  | -0.13655 | 1.17347  | -1.52785 |
| C  | -0.46341 | 2.45056  | -1.55898 |
| O  | -0.50371 | 3.24606  | -0.60497 |
| C  | -0.79782 | 2.91469  | -2.98713 |
| H  | -1.45720 | 2.19531  | -3.50086 |
| H  | -1.26948 | 3.90817  | -2.96318 |
| H  | 0.13237  | 2.97160  | -3.57858 |
| N  | -0.27521 | -1.63917 | -0.38390 |
| C  | -1.60370 | -1.98727 | -0.44940 |
| C  | 0.64394  | -2.63692 | -0.56925 |
| C  | -1.99310 | -3.32162 | -0.70362 |
| C  | 0.30580  | -3.96636 | -0.83232 |
| H  | 1.69419  | -2.34470 | -0.45613 |
| C  | -1.04441 | -4.32630 | -0.90532 |
| H  | -3.06298 | -3.53865 | -0.76330 |
| H  | 1.10840  | -4.69611 | -0.97116 |
| H  | -1.35340 | -5.35541 | -1.11515 |
| C  | -2.71504 | -1.00777 | -0.26071 |
| C  | -2.88493 | 0.10445  | -1.10987 |
| C  | -3.70671 | -1.28960 | 0.70708  |
| C  | -4.01540 | 0.92534  | -0.78310 |
| H  | -2.10946 | 0.32855  | -1.84620 |
| C  | -4.83501 | -0.46516 | 0.83718  |
| H  | -3.58372 | -2.15746 | 1.36469  |
| C  | -4.99331 | 0.64567  | -0.00949 |
| H  | -4.13309 | 1.78757  | -1.64241 |
| H  | -5.59483 | -0.69813 | 1.59149  |
| H  | -5.87786 | 1.28538  | 0.08156  |
| Ru | 0.68222  | 0.22548  | 0.13429  |
| N  | 1.57837  | -0.74544 | 1.60134  |
| C  | 2.15904  | -1.31075 | 2.45138  |
| C  | 3.03964  | -2.05983 | 3.33865  |
| H  | 3.44504  | -1.41088 | 4.13329  |
| H  | 2.50516  | -2.89844 | 3.81604  |
| H  | 3.87857  | -2.46109 | 2.74340  |

**<sup>1</sup>G** ( $2\kappa^2$ )

SCF (BP86) Energy = -1164.19014654  
 Enthalpy 0K = -1163.877080  
 Enthalpy 298K = -1163.850076  
 Free Energy 298K = -1163.938791  
 Lowest Frequency = 2.3128 cm<sup>-1</sup>  
 Second Frequency = 30.5548 cm<sup>-1</sup>  
 SCF (BP86-D3BJ) Energy = -1164.28137607  
 SCF (MeCN) Energy = -1164.21057055  
 SCF (Toluene) Energy = -1164.19895034  
 SCF (BS2) Energy = -1164.18808245



Ru -0.96422 0.11027 -0.20165  
 N -2.62762 -0.88204 -0.09697  
 C -3.63760 -1.48828 -0.03921  
 C -4.88678 -2.23601 0.03404  
 H -4.82740 -3.14967 -0.58270  
 H -5.10203 -2.53971 1.07366  
 H -5.73412 -1.62943 -0.33174  
 O -1.98415 1.92872 0.31291  
 C -1.80771 1.71145 1.56977  
 C -2.36276 2.64913 2.61408  
 H -1.70983 2.66272 3.49967  
 H -2.47052 3.66271 2.20074  
 H -3.35979 2.29718 2.93156  
 O -1.16796 0.64519 1.89777  
 O -0.80988 -0.31590 -2.28837  
 C -0.17821 -1.41333 -2.04155  
 O 0.05167 -1.69030 -0.80840  
 C 0.24133 -2.34368 -3.15299  
 H 1.15992 -2.88015 -2.87238  
 H -0.55181 -3.09157 -3.32697  
 H 0.39353 -1.78024 -4.08551  
 N 0.79820 1.22459 -0.42176  
 C 0.60542 2.39751 -1.09796  
 C 2.09103 0.86265 -0.11524  
 C 1.64187 3.23098 -1.51675  
 H -0.43987 2.63973 -1.30123  
 C 3.17428 1.67796 -0.51489  
 C 2.96371 2.86192 -1.22490  
 H 1.40543 4.14974 -2.06047  
 H 4.18328 1.37062 -0.22746  
 H 3.80815 3.48890 -1.52791  
 C 2.38178 -0.37534 0.65616  
 C 3.45877 -1.19918 0.25660  
 C 1.66199 -0.71006 1.82391  
 C 3.80252 -2.33831 0.99751  
 H 4.01047 -0.95870 -0.65901  
 C 2.01619 -1.84596 2.56630  
 H 0.83351 -0.07706 2.15071  
 C 3.08147 -2.66452 2.15755  
 H 4.62996 -2.97397 0.66466  
 H 1.45205 -2.09108 3.47234  
 H 3.34914 -3.55283 2.73972

**<sup>2</sup>G<sup>+</sup>** (κ<sup>2</sup>)

SCF (BP86) Energy = -1068.27102324  
 Enthalpy 0K = -1067.961742  
 Enthalpy 298K = -1067.935718  
 Free Energy 298K = -1068.020632  
 Lowest Frequency = 19.2404 cm<sup>-1</sup>  
 Second Frequency = 23.0511 cm<sup>-1</sup>  
 SCF (BP86-D3BJ) Energy = -1068.36092796  
 SCF (MeCN) Energy = -1068.32837445  
 SCF (Toluene) Energy = -1068.30435561  
 SCF (BS2) Energy = -1068.23131615

Ru 0.69568 -0.18817 0.10478  
 N -0.15594 -1.66385 -0.92977  
 C -0.59201 -2.55135 -1.55736  
 C -1.12944 -3.66120 -2.33272  
 H -2.23125 -3.65559 -2.29357  
 H -0.81176 -3.57931 -3.38551  
 H -0.76601 -4.61972 -1.92604  
 O 2.23605 -1.59125 0.67627  
 C 2.89626 -1.27876 -0.37972  
 O 2.35362 -0.38997 -1.16015  
 C 4.23613 -1.87446 -0.70089  
 H 5.02346 -1.30903 -0.17283  
 H 4.27872 -2.91669 -0.35152  
 H 4.43471 -1.81909 -1.78081  
 N -0.51900 1.22878 -0.76357  
 C -1.84114 1.31180 -0.39092

C -0.02776 2.09069 -1.69112  
 C -2.67607 2.29455 -0.95654  
 C -0.81827 3.07590 -2.28669  
 H 1.02613 1.95093 -1.94762  
 C -2.16719 3.18300 -1.90911  
 H -3.71701 2.36563 -0.63100  
 H -0.37729 3.74393 -3.03078  
 H -2.81105 3.95015 -2.34859  
 C -2.27985 0.31122 0.59678  
 C -1.28730 -0.36697 1.35885  
 C -3.62645 -0.07694 0.74926  
 C -1.63794 -1.39792 2.24908  
 H -0.28649 0.14392 1.60943  
 C -3.97425 -1.10003 1.64459  
 H -4.40619 0.39421 0.14261  
 C -2.98496 -1.76558 2.39036  
 H -0.85767 -1.89236 2.83543  
 H -5.02467 -1.38709 1.75224  
 H -3.26419 -2.56348 3.08501  
 N 1.69611 1.23802 1.07488  
 C 2.33467 2.05103 1.62928  
 C 3.12739 3.04989 2.33332  
 H 3.64838 2.58740 3.18849  
 H 3.87879 3.48905 1.65605  
 H 2.47697 3.85668 2.71033

**<sup>3</sup>G<sup>+</sup>** (κ<sup>2</sup>)

SCF (BP86) Energy = -1201.03658210  
 Enthalpy 0K = -1200.681669  
 Enthalpy 298K = -1200.650483  
 Free Energy 298K = -1200.747576  
 Lowest Frequency = 19.0768 cm<sup>-1</sup>  
 Second Frequency = 24.1061 cm<sup>-1</sup>  
 SCF (BP86-D3BJ) Energy = -1201.14204377  
 SCF (MeCN) Energy = -1201.09804878  
 SCF (Toluene) Energy = -1201.07132453  
 SCF (BS2) Energy = -1201.03610409

N -1.39003 0.75911 -1.52943  
 C -1.90097 1.08669 -2.53010  
 N -1.83323 1.08482 1.22297  
 C -2.65607 1.60253 1.87885  
 C -3.69136 2.22771 2.69214  
 H -4.20690 3.01559 2.11804  
 H -4.43552 1.47377 2.99965  
 H -3.25240 2.68126 3.59644  
 C -2.54050 1.41721 -3.79558  
 H -2.69958 0.49256 -4.37588  
 H -3.51630 1.89908 -3.61942  
 H -1.90699 2.10239 -4.38256  
 O -1.38500 -2.15854 -1.83647  
 C -2.08350 -2.23807 -0.80487  
 C -3.14251 -3.32550 -0.64270  
 H -3.92207 -3.03437 0.07607  
 H -3.58821 -3.55694 -1.62133  
 H -2.65884 -4.24554 -0.27081  
 O -1.97725 -1.44789 0.24627  
 N 0.91825 1.56798 0.00282  
 C 0.65100 2.88768 0.18582  
 C 2.18190 1.19411 -0.38994  
 C 1.60615 3.88810 -0.00307  
 H -0.37012 3.12160 0.49556  
 C 3.17918 2.16536 -0.60974  
 C 2.89767 3.52022 -0.41362  
 H 1.33367 4.93373 0.16175  
 H 4.16556 1.84769 -0.95672  
 H 3.66766 4.27723 -0.58783  
 C 2.41197 -0.25332 -0.55132  
 C 3.69541 -0.81530 -0.38043  
 C 1.31771 -1.12884 -0.79590  
 C 3.88790 -2.20200 -0.46469  
 H 4.54625 -0.16889 -0.14360

## XYZ Coordinates and Computed Energies

## Ru(II) Carboxylate Structures (Figures 9 and 10)

C 1.51460 -2.51960 -0.87554  
 H 0.32842 -0.82897 -1.28556  
 C 2.79993 -3.05706 -0.71029  
 H 4.89248 -2.61540 -0.33134  
 H 0.65334 -3.14722 -1.11854  
 H 2.95527 -4.13765 -0.78594  
 Ru -0.54868 0.07058 0.15318  
 N 0.19522 -0.69484 1.84179  
 C 0.56845 -1.19078 2.83411  
 C 1.03104 -1.82584 4.06102  
 H 1.82475 -2.55612 3.83223  
 H 1.43351 -1.07277 4.75863  
 H 0.19653 -2.35463 4.55093

**<sup>1</sup>G** ( $\kappa^2\kappa^1$ )

SCF (BP86) Energy = -1164.18926447  
 Enthalpy 0K = -1163.878437  
 Enthalpy 298K = -1163.851793  
 Free Energy 298K = -1163.937094  
 Lowest Frequency = 21.4406  $\text{cm}^{-1}$   
 Second Frequency = 31.2131  $\text{cm}^{-1}$   
 SCF (BP86-D3BJ) Energy = -1164.28335477  
 SCF (MeCN) Energy = -1164.21125998  
 SCF (Toluene) Energy = -1164.19927038  
 SCF (BS2) Energy = -1164.18914090

Ru -0.68338 0.20175 -0.05184  
 N 0.01902 1.88700 -0.79434  
 C 0.40070 2.90424 -1.24419  
 C 0.86532 4.17226 -1.79348  
 H 1.92560 4.33520 -1.53618  
 H 0.76830 4.18136 -2.89278  
 H 0.27674 5.01180 -1.38478  
 O -2.38867 1.29119 0.74067  
 C -3.02229 1.06253 -0.35196  
 O -2.39329 0.45664 -1.30611  
 C -4.47081 1.44990 -0.51621  
 H -5.10525 0.60455 -0.19836  
 H -4.70923 2.31710 0.11711  
 H -4.69416 1.66800 -1.57123  
 O -1.69959 -1.49809 0.53386  
 C -1.36668 -2.11325 1.64418  
 O -0.41666 -1.78972 2.39148  
 C -2.27737 -3.28428 2.00308  
 H -2.66789 -3.77685 1.10000  
 H -1.73494 -4.00461 2.63237  
 H -3.13779 -2.90243 2.57971  
 N 0.62293 -0.97079 -1.06449  
 C 1.94952 -0.99144 -0.68131  
 C 0.20667 -1.77343 -2.07958  
 C 2.86790 -1.81887 -1.35510  
 C 1.08142 -2.61027 -2.77446  
 H -0.85952 -1.70703 -2.31238  
 C 2.43953 -2.63124 -2.40970  
 H 3.91154 -1.83337 -1.02884  
 H 0.69753 -3.23487 -3.58554  
 H 3.14917 -3.27922 -2.93297  
 C 2.25537 -0.11377 0.45190  
 C 1.12855 0.38333 1.18239  
 C 3.55685 0.30366 0.79509  
 C 1.35190 1.27450 2.25609  
 H 0.21081 -0.38087 1.42232  
 C 3.75517 1.19532 1.85824  
 H 4.41774 -0.04251 0.21196  
 C 2.65149 1.68287 2.58541  
 H 0.49293 1.62758 2.83548  
 H 4.76946 1.51530 2.11809  
 H 2.81032 2.37786 3.41717

**TS (<sup>1</sup>G-<sup>1</sup>H)**

SCF (BP86) Energy = -1164.18761053  
 Enthalpy 0K = -1163.879960

Enthalpy 298K = -1163.853689  
 Free Energy 298K = -1163.937821  
 Lowest Frequency = -656.6399  $\text{cm}^{-1}$   
 Second Frequency = 22.8723  $\text{cm}^{-1}$   
 SCF (BP86-D3BJ) Energy = -1164.28226882  
 SCF (MeCN) Energy = -1164.20737032  
 SCF (Toluene) Energy = -1164.19658039  
 SCF (BS2) Energy = -1164.18618920

Ru -0.70253 0.12661 -0.08331  
 N -0.18756 1.87637 -0.78845  
 C 0.09070 2.93561 -1.21726  
 C 0.42308 4.25276 -1.74616  
 H 1.46567 4.51387 -1.49727  
 H 0.31152 4.27388 -2.84405  
 H -0.23883 5.02327 -1.31424  
 O -2.49084 1.00830 0.76411  
 C -3.13890 0.75760 -0.31945  
 O -2.50359 0.23952 -1.31308  
 C -4.62231 1.02937 -0.41086  
 H -5.17326 0.12326 -0.10458  
 H -4.90569 1.84945 0.26533  
 H -4.90597 1.26725 -1.44695  
 O -1.52522 -1.70314 0.49107  
 C -1.08165 -2.23289 1.58163  
 O -0.14607 -1.72441 2.27864  
 C -1.73551 -3.51950 2.04786  
 H -2.39265 -3.93184 1.26988  
 H -0.96239 -4.25296 2.32515  
 H -2.33101 -3.31152 2.95286  
 N 0.73515 -0.86638 -1.11854  
 C 2.04843 -0.75984 -0.69877  
 C 0.43524 -1.65363 -2.18509  
 C 3.06734 -1.44510 -1.38901  
 C 1.41196 -2.35384 -2.89549  
 H -0.62557 -1.68873 -2.44896  
 C 2.75552 -2.24385 -2.49343  
 H 4.09986 -1.35827 -1.03908  
 H 1.11845 -2.97191 -3.74826  
 H 3.54488 -2.77998 -3.02922  
 C 2.21801 0.08570 0.48423  
 C 0.99818 0.45188 1.15060  
 C 3.46229 0.57181 0.93442  
 C 1.09746 1.31490 2.27101  
 H 0.19610 -0.57447 1.50715  
 C 3.52423 1.42204 2.04624  
 H 4.38437 0.31213 0.40115  
 C 2.33870 1.79540 2.71041  
 H 0.18096 1.59137 2.80396  
 H 4.49214 1.79890 2.39260  
 H 2.38856 2.46318 3.57802

**<sup>1</sup>H**

SCF (BP86) Energy = -1164.19893635  
 Enthalpy 0K = -1163.886803  
 Enthalpy 298K = -1163.859793  
 Free Energy 298K = -1163.947262  
 Lowest Frequency = 18.0371  $\text{cm}^{-1}$   
 Second Frequency = 19.6736  $\text{cm}^{-1}$   
 SCF (BP86-D3BJ) Energy = -1164.29321973  
 SCF (MeCN) Energy = -1164.21743860  
 SCF (Toluene) Energy = -1164.20740040  
 SCF (BS2) Energy = -1164.19712912

Ru 0.66175 0.16617 0.11254  
 N 0.58480 2.06510 -0.17026  
 C 0.56071 3.22957 -0.35086  
 C 0.55160 4.67198 -0.56059  
 H -0.46125 5.01807 -0.82994  
 H 0.86801 5.20658 0.35252  
 H 1.23757 4.95114 -1.37951  
 O 2.52959 0.06864 -0.94804

## XYZ Coordinates and Computed Energies

## Ru(II) Carboxylate Structures (Figures 9 and 10)

C 3.23638 0.24531 0.12401  
 O 2.65721 0.40780 1.24933  
 C 4.74839 0.28676 0.01004  
 H 5.20964 -0.12664 0.91959  
 H 5.08772 -0.26548 -0.87879  
 H 5.07788 1.33589 -0.08858  
 O 1.00238 -1.87537 0.58830  
 C 0.70349 -2.87649 -0.10410  
 O 0.01098 -2.80980 -1.23236  
 C 1.12002 -4.26573 0.29894  
 H 1.64291 -4.23404 1.26315  
 H 0.23597 -4.92061 0.36518  
 H 1.78422 -4.68941 -0.47284  
 N -0.95968 0.16824 1.35237  
 C -2.21500 0.05771 0.77738  
 C -0.85052 0.23934 2.70422  
 C -3.36281 0.01970 1.59291  
 C -1.96047 0.20405 3.55200  
 H 0.17366 0.32644 3.07960  
 C -3.24268 0.09302 2.98460  
 H -4.34766 -0.07221 1.12566  
 H -1.81571 0.26440 4.63410  
 H -4.13409 0.06301 3.61908  
 C -2.16956 -0.01252 -0.68344  
 C -0.83393 -0.01060 -1.22640  
 C -3.30675 -0.05294 -1.51637  
 C -0.72611 -0.02111 -2.64359  
 H -0.22611 -1.83526 -1.37782  
 C -3.15598 -0.08567 -2.90947  
 H -4.31517 -0.04926 -1.08414  
 C -1.86381 -0.06525 -3.46909  
 H 0.27271 0.00638 -3.09722  
 H -4.03850 -0.11947 -3.55652  
 H -1.74398 -0.07731 -4.55911

 ${}^2G$  ( $\kappa^2\kappa^1$ )

SCF (BP86) Energy = -1296.95420395  
 Enthalpy 0K = -1296.597601  
 Enthalpy 298K = -1296.565701  
 Free Energy 298K = -1296.663759  
 Lowest Frequency = 29.5860  $\text{cm}^{-1}$   
 Second Frequency = 32.8386  $\text{cm}^{-1}$   
 SCF (BP86-D3BJ) Energy = -1297.06313633  
 SCF (MeCN) Energy = -1296.98097139  
 SCF (Toluene) Energy = -1296.96637380  
 SCF (BS2) Energy = -1296.99614684

N 1.90057 -1.02015 0.87780  
 C 2.79413 -1.61156 1.35244  
 C 3.95949 -2.30561 1.88338  
 H 4.25579 -1.87207 2.85344  
 H 3.74765 -3.37798 2.03202  
 H 4.80372 -2.20594 1.17973  
 O 3.27357 -0.14223 -1.60367  
 C 2.83568 1.00848 -1.45737  
 O 1.71749 1.36846 -0.85084  
 C 3.60141 2.23142 -1.98793  
 H 2.94331 2.87064 -2.59955  
 H 3.95569 2.84471 -1.14205  
 H 4.46364 1.90340 -2.58616  
 O 0.64533 1.42071 1.65805  
 C 0.12873 1.16281 2.83433  
 O -0.53682 0.14442 3.13095  
 C 0.36862 2.26291 3.86807  
 H 1.30666 2.80125 3.66663  
 H -0.46024 2.99044 3.81784  
 H 0.37970 1.83109 4.87973  
 N -1.15667 1.22731 -0.52511  
 C -2.42296 0.69088 -0.45888  
 C -0.98741 2.51885 -0.90443  
 C -3.54162 1.47947 -0.79337  
 C -2.06584 3.33667 -1.25032

H 0.05597 2.84717 -0.92935  
 C -3.36677 2.80776 -1.19358  
 H -4.54335 1.04891 -0.71250  
 H -1.88304 4.37184 -1.55130  
 H -4.23354 3.42632 -1.44686  
 C -2.47655 -0.70860 -0.01610  
 C -1.30727 -1.23599 0.62237  
 C -3.57675 -1.55197 -0.27150  
 C -1.29823 -2.59901 0.99883  
 H -0.70257 -0.55905 1.41693  
 C -3.54163 -2.90215 0.10265  
 H -4.45427 -1.16169 -0.79899  
 C -2.39723 -3.42606 0.73409  
 H -0.42202 -2.99413 1.52207  
 H -4.40155 -3.54736 -0.10405  
 H -2.37062 -4.48101 1.02847  
 Ru 0.42406 0.06150 0.10367  
 N 0.42841 -1.05951 -1.53761  
 C 0.50858 -1.69133 -2.52123  
 C 0.71464 -2.44656 -3.74994  
 H 0.48185 -3.51379 -3.59751  
 H 0.07252 -2.06153 -4.56004  
 H 1.76946 -2.35404 -4.06052

TS ( ${}^2G-{}^2H$ )

SCF (BP86) Energy = -1296.95136606  
 Enthalpy 0K = -1296.598151  
 Enthalpy 298K = -1296.566695  
 Free Energy 298K = -1296.662937  
 Lowest Frequency = -789.9563  $\text{cm}^{-1}$   
 Second Frequency = 33.6814  $\text{cm}^{-1}$   
 SCF (BP86-D3BJ) Energy = -1297.06107808  
 SCF (MeCN) Energy = -1296.97556370  
 SCF (Toluene) Energy = -1296.96229320  
 SCF (BS2) Energy = -1296.99187977

N 1.85109 -1.25936 0.62320  
 C 2.73246 -1.98055 0.90523  
 C 3.90511 -2.79534 1.19388  
 H 4.18231 -2.71109 2.25831  
 H 3.71686 -3.85859 0.96749  
 H 4.75450 -2.44746 0.58070  
 O 3.40235 0.39160 -1.33440  
 C 2.93944 1.43754 -0.84983  
 O 1.78378 1.58720 -0.23381  
 C 3.72548 2.75884 -0.91677  
 H 3.12007 3.54558 -1.39789  
 H 3.96028 3.10943 0.10256  
 H 4.65942 2.61577 -1.47938  
 O 0.50452 0.80395 2.09302  
 C -0.18243 0.20085 2.99770  
 O -0.92156 -0.81464 2.76355  
 C -0.11168 0.74304 4.41233  
 H 0.62409 1.55564 4.48344  
 H -1.10568 1.11621 4.71020  
 H 0.15268 -0.06970 5.10776  
 N -1.12838 1.34148 -0.21961  
 C -2.38782 0.80732 -0.39071  
 C -0.95232 2.68651 -0.22876  
 C -3.49195 1.66393 -0.57892  
 C -2.01687 3.57179 -0.41443  
 H 0.08769 3.00305 -0.09803  
 C -3.31029 3.04983 -0.59246  
 H -4.49026 1.23313 -0.69412  
 H -1.83018 4.64917 -0.41517  
 H -4.16727 3.71658 -0.73200  
 C -2.43539 -0.65825 -0.34598  
 C -1.24938 -1.31352 0.14002  
 C -3.53743 -1.40534 -0.81085  
 C -1.24393 -2.73250 0.12059  
 H -0.82525 -0.93278 1.38944  
 C -3.49539 -2.80540 -0.80979

## XYZ Coordinates and Computed Energies

## Ru(II) Carboxylate Structures (Figures 9 and 10)

H -4.42258 -0.89451 -1.20750  
 C -2.34128 -3.46737 -0.34746  
 H -0.36214 -3.25931 0.50212  
 H -4.35345 -3.37914 -1.17483  
 H -2.30443 -4.56296 -0.34960  
 Ru 0.42049 0.02610 0.14408  
 N 0.55852 -0.50585 -1.74725  
 C 0.71280 -0.79089 -2.87331  
 C 1.01865 -1.10430 -4.26271  
 H 0.80738 -2.16437 -4.48208  
 H 0.41846 -0.48063 -4.94659  
 H 2.08802 -0.90828 -4.45215

H 2.54019 1.15120 -4.22001

**2H**

SCF (BP86) Energy = -1296.95983161  
 Enthalpy 0K = -1296.602109  
 Enthalpy 298K = -1296.570100  
 Free Energy 298K = -1296.668324  
 Lowest Frequency = 29.1953 cm<sup>-1</sup>  
 Second Frequency = 29.9636 cm<sup>-1</sup>  
 SCF (BP86-D3BJ) Energy = -1297.06923639  
 SCF (MeCN) Energy = -1296.98323969  
 SCF (Toluene) Energy = -1296.97041092  
 SCF (BS2) Energy = -1297.00011140

N 1.68269 -1.53945 -0.03311  
 C 2.50761 -2.37404 -0.10333  
 C 3.66969 -3.24830 -0.19975  
 H 3.86162 -3.75058 0.76368  
 H 3.52441 -4.02473 -0.97006  
 H 4.55567 -2.64479 -0.46532  
 O 3.57243 0.70356 -0.74449  
 C 3.10179 1.43369 0.14836  
 O 1.89463 1.38127 0.66190  
 C 3.95980 2.55107 0.77420  
 H 3.49700 3.53612 0.58927  
 H 4.01571 2.42288 1.86849  
 H 4.97397 2.54098 0.34836  
 O 0.27136 -0.28612 2.18051  
 C -0.35854 -1.18678 2.78214  
 O -1.10406 -2.09301 2.16655  
 C -0.31841 -1.30612 4.28259  
 H 0.35799 -0.54882 4.69871  
 H -1.33284 -1.17203 4.69359  
 H 0.01908 -2.31563 4.56898  
 N -1.04112 1.43474 0.21697  
 C -2.33269 1.09674 -0.13287  
 C -0.76036 2.67918 0.67632  
 C -3.35953 2.05644 -0.01122  
 C -1.74676 3.65956 0.81240  
 H 0.29696 2.83331 0.92233  
 C -3.07025 3.34016 0.46029  
 H -4.38347 1.78495 -0.28238  
 H -1.47768 4.65077 1.18763  
 H -3.86825 4.08378 0.55593  
 C -2.48213 -0.28372 -0.60568  
 C -1.28422 -1.08731 -0.54383  
 C -3.69186 -0.79667 -1.12089  
 C -1.39431 -2.40804 -1.05816  
 H -1.08720 -1.84702 1.17580  
 C -3.75735 -2.11286 -1.59545  
 H -4.58819 -0.16620 -1.16804  
 C -2.60157 -2.91576 -1.56677  
 H -0.50621 -3.05246 -1.05378  
 H -4.69804 -2.50780 -1.99276  
 H -2.64342 -3.94326 -1.94830  
 Ru 0.38731 -0.05549 0.05924  
 N 0.71791 0.34511 -1.80814  
 C 0.98591 0.60356 -2.92076  
 C 1.45166 0.97019 -4.25160  
 H 1.24672 0.16684 -4.97939  
 H 0.95199 1.88975 -4.60101

## XYZ Coordinates and Computed Energies

## Ru(II) Carboxylate Structures (Ion-Pair Isomers)

**B·OAc (back)**

SCF (BP86) Energy = -1263.61755175  
 Enthalpy 0K = -1263.252431  
 Enthalpy 298K = -1263.224193  
 Free Energy 298K = -1263.312746  
 Lowest Frequency = 17.3975 cm<sup>-1</sup>  
 Second Frequency = 28.7966 cm<sup>-1</sup>  
 SCF (BP86-D3BJ) Energy = -1263.73742642  
 SCF (MeCN) Energy = -1263.64064955  
 SCF (Toluene) Energy = -1263.62818423  
 SCF (BS2) Energy = -1263.64417376

C -0.07768 -1.97782 1.42682  
 N -0.05249 -0.69014 0.97628  
 C -1.09177 0.14432 1.29555  
 C -2.18410 -0.33791 2.04896  
 C -2.20621 -1.65742 2.50120  
 C -1.12338 -2.49199 2.19108  
 Ru 1.41958 -0.29344 -0.52617  
 C 2.60342 -0.39066 -2.39071  
 C 1.61889 -1.44709 -2.35698  
 C 0.23451 -1.14378 -2.18758  
 C -0.17492 0.22007 -1.99489  
 C 0.78924 1.26535 -1.96557  
 C 2.18586 0.95194 -2.16216  
 H -0.54523 -1.90448 -2.07362  
 C -1.08181 1.57679 0.88906  
 C -2.23397 2.10902 0.26328  
 C -2.26059 3.46775 -0.08902  
 C -1.16712 4.30491 0.19452  
 C -0.03401 3.77881 0.83962  
 C 0.01323 2.41900 1.18538  
 H 2.93949 1.73700 -2.04690  
 O 2.72373 -1.51471 0.68307  
 C 3.09294 -0.49410 1.38122  
 O 2.62184 0.64890 1.02932  
 C 4.00276 -0.64495 2.56942  
 H 4.58020 0.27748 2.72847  
 H 3.39371 -0.83013 3.47133  
 H 4.67731 -1.50236 2.42863  
 H -3.07263 1.41975 0.04443  
 H -3.14684 3.87528 -0.58765  
 H 0.81271 4.42922 1.08488  
 H -1.20113 5.36652 -0.07459  
 H -3.00802 0.34448 2.25712  
 H 0.89404 2.01280 1.69050  
 H 3.66734 -0.63216 -2.46006  
 H 0.48744 2.28266 -1.70391  
 H 1.95086 -2.48951 -2.39013  
 H -1.23427 0.34501 -1.71863  
 H -1.08567 -3.53509 2.51656  
 H -3.05940 -2.02966 3.07566  
 H 0.77786 -2.59426 1.14496  
 O -2.51680 -1.13081 -1.27699  
 C -3.70755 -1.13297 -0.80289  
 C -4.59622 -2.33084 -1.21487  
 H -4.69977 -2.36058 -2.31372  
 H -4.11533 -3.27917 -0.91580  
 H -5.59527 -2.26637 -0.75686  
 O -4.21882 -0.26020 -0.03688

**B·OAc (a) - "B·OAc" in figure**

SCF (BP86) Energy = -1263.62317136  
 Enthalpy 0K = -1263.257959  
 Enthalpy 298K = -1263.229825  
 Free Energy 298K = -1263.317921  
 Lowest Frequency = 25.6024 cm<sup>-1</sup>  
 Second Frequency = 37.4299 cm<sup>-1</sup>  
 SCF (BP86-D3BJ) Energy = -1263.74415414  
 SCF (MeCN) Energy = -1263.64507734  
 SCF (Toluene) Energy = -1263.63339724  
 SCF (BS2) Energy = -1263.64784484

C -0.46161 -1.76693 1.51405  
 N -0.24142 -0.52532 0.99936  
 C -1.09453 0.49047 1.33635  
 C -2.16626 0.25235 2.21940  
 C -2.37928 -1.01938 2.75623  
 C -1.50538 -2.05168 2.39359  
 Ru 1.28668 -0.41104 -0.48730  
 C 2.51627 -0.70733 -2.29770  
 C 1.49504 -1.72436 -2.20492  
 C 0.11463 -1.37159 -2.09993  
 C -0.25311 0.01589 -2.03318  
 C 0.74369 1.03348 -2.06852  
 C 2.13413 0.66300 -2.19486  
 H -0.71204 -2.08420 -1.88362  
 C -0.91977 1.86356 0.77906  
 C -1.96168 2.40288 -0.00948  
 C -1.85237 3.71383 -0.50028  
 C -0.72478 4.49678 -0.19821  
 C 0.30488 3.96259 0.59558  
 C 0.21174 2.65002 1.08462  
 H 2.90935 1.43224 -2.12033  
 O 2.41315 -1.65165 0.87383  
 C 2.87205 -0.61774 1.49326  
 O 2.53753 0.53438 1.03040  
 C 3.73074 -0.75858 2.72133  
 H 4.39110 0.11433 2.82880  
 H 3.08352 -0.81466 3.61387  
 H 4.32235 -1.68453 2.66940  
 H -2.80200 1.75040 -0.28240  
 H -2.65255 4.12251 -1.12655  
 H 1.18202 4.57050 0.84194  
 H -0.64919 5.52170 -0.57746  
 H -2.82381 1.08958 2.46518  
 H 1.01665 2.23273 1.69595  
 H 3.57374 -0.98453 -2.31664  
 H 0.47114 2.07996 -1.90745  
 H 1.79636 -2.77468 -2.13353  
 H -1.32727 0.19775 -1.78225  
 H -1.63343 -3.07349 2.75849  
 H -3.21674 -1.20284 3.43625  
 H 0.23300 -2.54297 1.19017  
 O -2.42767 -2.41964 -1.07886  
 C -3.25082 -1.45930 -0.94474  
 C -4.69609 -1.82118 -0.52833  
 H -4.78361 -2.88282 -0.25024  
 H -5.02652 -1.18383 0.30997  
 H -5.38056 -1.61558 -1.37032  
 O -3.02804 -0.21126 -1.13702

**B·OAc (b)**

SCF (BP86) Energy = -1263.61961761  
 Enthalpy 0K = -1263.254889  
 Enthalpy 298K = -1263.226765  
 Free Energy 298K = -1263.315320  
 Lowest Frequency = 16.4969 cm<sup>-1</sup>  
 Second Frequency = 32.4630 cm<sup>-1</sup>  
 SCF (BP86-D3BJ) Energy = -1263.73537216  
 SCF (MeCN) Energy = -1263.64571925  
 SCF (Toluene) Energy = -1263.63184926  
 SCF (BS2) Energy = -1263.64431141

C -0.77298 2.05946 0.03924  
 N 0.30583 1.22260 0.05652  
 C 1.57013 1.75377 -0.00645  
 C 1.75186 3.15106 -0.02512  
 C 0.64900 4.01279 -0.00124  
 C -0.63248 3.45171 0.01141  
 Ru -0.21653 -0.84822 0.07120  
 C -1.11575 -2.82953 -0.35670  
 C -1.80008 -1.79898 -1.09269  
 C -1.06164 -0.92810 -1.95636

## XYZ Coordinates and Computed Energies

```

C 0.36658 -1.05424 -2.04214
C 1.06526 -2.03753 -1.27605
C 0.30878 -2.91344 -0.41439
H -1.61510 -0.07912 -2.37613
C 2.77439 0.87927 -0.13281
C 3.62449 1.07603 -1.24542
C 4.78882 0.30816 -1.40156
C 5.13055 -0.65291 -0.43623
C 4.30119 -0.83990 0.68268
C 3.12833 -0.08409 0.83668
H 0.84249 -3.58922 0.26153
O -1.54361 -0.25578 1.66715
C -0.64158 -0.45917 2.55694
O 0.49131 -0.91895 2.14376
C -0.88560 -0.14552 4.00865
H -0.28423 -0.80612 4.65053
H -0.58871 0.89811 4.21188
H -1.95515 -0.24955 4.24265
H 3.35864 1.82678 -1.99787
H 5.42903 0.46412 -2.27596
H 4.57000 -1.57593 1.44774
H 6.04286 -1.24736 -0.55134
H 2.77342 3.53959 -0.05217
H 2.48493 -0.23829 1.70643
H -1.66896 -3.44923 0.35471
H 2.15749 -2.06636 -1.27300
H -2.89082 -1.54511 -0.92990
H 0.94653 -0.31484 -2.60356
H -1.53619 4.06574 -0.01816
H 0.79327 5.09801 -0.01068
H -1.76939 1.58952 -0.05874
O -4.47556 -0.78474 -0.76485
C -4.26892 0.46472 -0.86334
C -5.43417 1.40464 -0.48467
H -6.37883 0.84980 -0.37731
H -5.20645 1.90202 0.47570
H -5.54719 2.19949 -1.24104
O -3.17817 1.03222 -1.23558

```

**B·OAc (c)**

```

SCF (BP86) Energy = -1263.61961756
Enthalpy 0K = -1263.254889
Enthalpy 298K = -1263.226765
Free Energy 298K = -1263.315322
Lowest Frequency = 16.5031 cm-1
Second Frequency = 32.4711 cm-1
SCF (BP86-D3BJ) Energy = -1263.73537003
SCF (MeCN) Energy = -1263.64572011
SCF (Toluene) Energy = -1263.63184947
SCF (BS2) Energy = -1263.64431247

```

```

C -0.77285 2.05950 0.03911
N 0.30593 1.22261 0.05645
C 1.57024 1.75375 -0.00641
C 1.75201 3.15102 -0.02498
C 0.64918 4.01279 -0.00115
C -0.63232 3.45175 0.01136
Ru -0.21653 -0.84818 0.07119
C -1.80019 -1.79890 -1.09262
C -1.06181 -0.92796 -1.95627
C 0.36641 -1.05414 -2.04222
C 1.06515 -2.03747 -1.27624
C 0.30874 -2.91341 -0.41456
C -1.11579 -2.82951 -0.35676
H 0.94632 -0.31474 -2.60365
C 2.77447 0.87921 -0.13275
C 3.62480 1.07623 -1.24517
C 4.78911 0.30832 -1.40131
C 5.13061 -0.65301 -0.43618
C 4.30106 -0.84027 0.68252
C 3.12822 -0.08444 0.83652
H -1.66893 -3.44927 0.35463

```

## Ru(II) Carboxylate Structures (Ion-Pair Isomers)

```

O -1.54357 -0.25579 1.66723
C -0.64149 -0.45920 2.55694
O 0.49143 -0.91884 2.14367
C -0.88534 -0.14589 4.00878
H -0.28737 -0.80985 4.65040
H -0.58360 0.89607 4.21342
H -1.95549 -0.24542 4.24189
H 3.35911 1.82719 -1.99747
H 5.42948 0.46448 -2.27557
H 4.56967 -1.57653 1.44741
H 6.04291 -1.24749 -0.55131
H 2.77357 3.53952 -0.05191
H 2.48464 -0.23884 1.70612
H -2.89093 -1.54509 -0.92985
H 0.84248 -3.58928 0.26127
H -1.61537 -0.07894 -2.37581
H 2.15739 -2.06630 -1.27330
H -1.53601 4.06579 -0.01822
H 0.79346 5.09801 -0.01050
H -1.76930 1.58958 -0.05883
O -4.47576 -0.78471 -0.76497
C -4.26919 0.46479 -0.86329
C -5.43462 1.40461 -0.48492
H -6.37909 0.84958 -0.37685
H -5.20673 1.90289 0.47491
H -5.54816 2.19881 -1.24193
O -3.17841 1.03243 -1.23524

```

**B·OAc (d)**

```

SCF (BP86) Energy = -1263.61507137
Enthalpy 0K = -1263.249889
Enthalpy 298K = -1263.222304
Free Energy 298K = -1263.308311
Lowest Frequency = 17.6901 cm-1
Second Frequency = 31.3655 cm-1
SCF (BP86-D3BJ) Energy = -1263.73110743
SCF (MeCN) Energy = -1263.64376079
SCF (Toluene) Energy = -1263.62829778
SCF (BS2) Energy = -1263.63891540

```

```

C 1.74835 -2.53872 -0.31222
N 1.61726 -1.18249 -0.24002
C 2.68431 -0.40218 -0.61047
C 3.89759 -1.00089 -1.01634
C 4.03298 -2.39075 -1.05616
C 2.92693 -3.17641 -0.70257
Ru -0.22253 -0.52138 0.65635
C -1.97221 -0.26146 1.97350
C -1.01000 -1.14066 2.59037
C 0.34519 -0.72505 2.78241
C 0.75038 0.57617 2.31139
C -0.19432 1.44445 1.68937
C -1.56067 1.01779 1.50558
H 1.08360 -1.41890 3.19362
C 2.58867 1.08320 -0.60344
C 3.62335 1.83745 -0.00290
C 3.59063 3.23960 -0.02917
C 2.53479 3.90526 -0.67391
C 1.51219 3.16235 -1.28806
C 1.53125 1.75959 -1.25270
H -2.32374 1.57014 0.87830
O -1.14316 -2.12245 -0.40331
C -1.46140 -1.32916 -1.38027
O -0.94104 -0.14984 -1.33434
C -2.45166 -1.72402 -2.41940
H -3.42114 -1.39485 -1.97978
H -2.27352 -1.18691 -3.36244
H -2.45981 -2.81305 -2.57255
H 4.44547 1.31946 0.50390
H 4.39009 3.81084 0.45368
H 0.68985 3.67344 -1.79860
H 2.51093 4.99949 -0.70068

```

## XYZ Coordinates and Computed Energies

H 4.71743 -0.34740 -1.32561  
H 0.73060 1.18905 -1.73110  
H -2.96442 -0.59983 1.63616  
H 0.14564 2.39275 1.26525  
H -1.29139 -2.17130 2.82971  
H 1.80555 0.86250 2.35214  
H 2.96245 -4.26868 -0.72869  
H 4.97423 -2.84980 -1.37378  
H 0.85370 -3.10592 -0.04678  
O -3.76776 1.98539 -0.04132  
C -4.31879 0.93577 -0.50566  
C -5.45457 1.14824 -1.53383  
H -5.83868 2.17949 -1.49829  
H -5.06824 0.95933 -2.55246  
H -6.27399 0.43152 -1.35877  
O -4.02082 -0.28014 -0.23052

**B·OAc (e)**

SCF (BP86) Energy = -1263.61424113  
Enthalpy 0K = -1263.249268  
Enthalpy 298K = -1263.221303  
Free Energy 298K = -1263.308786  
Lowest Frequency = 19.8544 cm<sup>-1</sup>  
Second Frequency = 37.7138 cm<sup>-1</sup>  
SCF (BP86-D3BJ) Energy = -1263.73026114  
SCF (MeCN) Energy = -1263.64295556  
SCF (Toluene) Energy = -1263.62741353  
SCF (BS2) Energy = -1263.63837944

C 2.85683 -1.36773 -0.44090  
N 1.95136 -0.36456 -0.24295  
C 2.32473 0.92472 -0.54816  
C 3.61754 1.17645 -1.06785  
C 4.53802 0.14533 -1.25493  
C 4.14766 -1.16083 -0.92617  
Ru 0.08848 -1.05151 0.59895  
C -1.12625 -2.22019 2.01117  
C 0.18231 -1.97377 2.58147  
C 0.66530 -0.63554 2.67912  
C -0.13780 0.46402 2.19860  
C -1.41135 0.20586 1.61632  
C -1.92412 -1.14197 1.54567  
H 1.68699 -0.45692 3.02877  
C 1.42271 2.08266 -0.31684  
C 1.96566 3.23963 0.29653  
C 1.16031 4.36163 0.53513  
C -0.19628 4.34537 0.16541  
C -0.74480 3.20923 -0.45174  
C 0.06318 2.08819 -0.70064  
H -2.86207 -1.23727 0.94492  
O 0.32437 -2.74623 -0.72436  
C -0.27074 -2.11267 -1.68327  
O -0.64615 -0.91265 -1.43208  
C -0.55082 -2.76339 -3.00796  
H -1.58846 -3.13969 -3.00236  
H -0.46831 -2.02386 -3.81843  
H 0.13151 -3.60814 -3.18041  
H 3.01328 3.24282 0.61807  
H 1.59018 5.24210 1.02449  
H -1.81322 3.13158 -0.68903  
H -0.82836 5.21633 0.36866  
H 3.86677 2.20511 -1.33939  
H -0.37830 1.21836 -1.19162  
H -1.44460 -3.25318 1.83984  
H -2.03519 0.96403 1.06762  
H 0.82549 -2.81080 2.86929  
H 0.27856 1.47437 2.18606  
H 4.81853 -2.01505 -1.04921  
H 5.53348 0.35367 -1.65921  
H 2.50087 -2.37132 -0.20096  
O -3.26263 1.58013 -0.12384  
C -3.99561 0.66621 -0.64905

## Ru(II) Carboxylate Structures (Ion-Pair Isomers)

C -4.91582 1.13677 -1.79885  
H -5.49443 2.02210 -1.48457  
H -4.30065 1.44716 -2.66244  
H -5.60192 0.33664 -2.11627  
O -4.04142 -0.56370 -0.33288

**B·OAc (f)**

SCF (BP86) Energy = -1263.62317092  
Enthalpy 0K = -1263.257959  
Enthalpy 298K = -1263.229825  
Free Energy 298K = -1263.317921  
Lowest Frequency = 25.5920 cm<sup>-1</sup>  
Second Frequency = 37.5366 cm<sup>-1</sup>  
SCF (BP86-D3BJ) Energy = -1263.74415430  
SCF (MeCN) Energy = -1263.64507472  
SCF (Toluene) Energy = -1263.63339571  
SCF (BS2) Energy = -1263.64784417

C -0.46220 -1.76645 1.51423  
N -0.24161 -0.52500 0.99931  
C -1.09438 0.49113 1.33615  
C -2.16606 0.25355 2.21941  
C -2.37944 -1.01800 2.75653  
C -1.50596 -2.05068 2.39393  
Ru 1.28671 -0.41145 -0.48720  
C 2.13457 0.66170 -2.19511  
C 2.51626 -0.70879 -2.29745  
C 1.49469 -1.72547 -2.20436  
C 0.11440 -1.37223 -2.09948  
C -0.25289 0.01540 -2.03321  
C 0.74423 1.03266 -2.06888  
H 1.79567 -2.77586 -2.13265  
C -0.91939 1.86403 0.77842  
C -1.96123 2.40319 -0.01035  
C -1.85178 3.71396 -0.50158  
C -0.72413 4.49691 -0.19974  
C 0.30544 3.96289 0.59428  
C 0.21216 2.65049 1.08378  
H 0.47202 2.07927 -1.90809  
O 2.41271 -1.65167 0.87475  
C 2.87155 -0.61756 1.49384  
O 2.53736 0.53441 1.03033  
C 3.72977 -0.75773 2.72232  
H 4.39586 0.11144 2.82496  
H 3.08252 -0.80432 3.61539  
H 4.31527 -1.68777 2.67514  
H -2.80161 1.75070 -0.28304  
H -2.65190 4.12250 -1.12803  
H 1.18262 4.57080 0.84048  
H -0.64842 5.52170 -0.57932  
H -2.82330 1.09104 2.46509  
H 1.01701 2.23333 1.69527  
H 2.91003 1.43072 -2.12084  
H -1.32698 0.19767 -1.78239  
H 3.57364 -0.98634 -2.31634  
H -0.71249 -2.08454 -1.88291  
H -1.63433 -3.07238 2.75901  
H -3.21684 -1.20104 3.43671  
H 0.23211 -2.54279 1.19042  
O -2.42795 -2.41989 -1.07841  
C -3.25088 -1.45933 -0.94443  
C -4.69622 -1.82078 -0.52793  
H -5.38107 -1.61289 -1.36903  
H -4.78447 -2.88283 -0.25167  
H -5.02553 -1.18471 0.31181  
O -3.02775 -0.21136 -1.13673

**B·OAc (under)**

SCF (BP86) Energy = -1263.60508082  
Enthalpy 0K = -1263.239992  
Enthalpy 298K = -1263.212332  
Free Energy 298K = -1263.297578

Lowest Frequency = 29.9419 cm<sup>-1</sup>  
Second Frequency = 40.0174 cm<sup>-1</sup>  
SCF (BP86-D3BJ) Energy = -1263.72755546  
SCF (MeCN) Energy = -1263.63052978  
SCF (Toluene) Energy = -1263.61629427  
SCF (BS2) Energy = -1263.63187008

|    |          |          |          |
|----|----------|----------|----------|
| C  | 1.46540  | -0.49254 | 1.71408  |
| N  | 0.48803  | 0.13376  | 1.00247  |
| C  | 0.44055  | 1.50961  | 1.03440  |
| C  | 1.19187  | 2.22877  | 1.97207  |
| C  | 2.08132  | 1.55791  | 2.82693  |
| C  | 2.24676  | 0.18566  | 2.66567  |
| Ru | -1.00535 | -1.09811 | 0.09648  |
| C  | -2.74898 | -2.36498 | -0.44821 |
| C  | -2.47019 | -2.44293 | 0.95979  |
| C  | -2.43740 | -1.26530 | 1.77765  |
| C  | -2.61089 | 0.01195  | 1.14947  |
| C  | -2.84074 | 0.12210  | -0.25401 |
| C  | -2.87409 | -1.07619 | -1.05003 |
| H  | -2.18365 | -1.33475 | 2.83780  |
| C  | -0.38673 | 2.24317  | 0.04087  |
| C  | -1.34125 | 3.20046  | 0.44706  |
| C  | -2.09220 | 3.90539  | -0.50872 |
| C  | -1.88047 | 3.67169  | -1.87827 |
| C  | -0.90186 | 2.74652  | -2.28689 |
| C  | -0.15280 | 2.03603  | -1.33768 |
| H  | -2.92801 | -0.99407 | -2.13971 |
| O  | 0.47285  | -2.61009 | -0.00748 |
| C  | 0.90961  | -2.16845 | -1.14925 |
| O  | 0.24469  | -1.17419 | -1.63715 |
| C  | 2.10772  | -2.75220 | -1.80758 |
| H  | 2.12067  | -2.51202 | -2.88038 |
| H  | 2.96932  | -2.26154 | -1.29167 |
| H  | 2.14747  | -3.84001 | -1.64426 |
| H  | -1.49948 | 3.38598  | 1.51616  |
| H  | -2.83781 | 4.63885  | -0.18368 |
| H  | -0.70703 | 2.59104  | -3.35339 |
| H  | -2.46070 | 4.22505  | -2.62445 |
| H  | 1.11869  | 3.31913  | 1.97114  |
| H  | 0.65291  | 1.35566  | -1.62851 |
| H  | -2.71278 | -3.26488 | -1.06668 |
| H  | -2.88638 | 1.10528  | -0.72765 |
| H  | -2.21063 | -3.41005 | 1.40109  |
| H  | -2.46691 | 0.92457  | 1.73373  |
| H  | 2.98258  | -0.38222 | 3.23967  |
| H  | 2.67080  | 2.11484  | 3.56210  |
| H  | 1.51523  | -1.57460 | 1.60967  |
| O  | 3.35416  | -0.82996 | 0.02891  |
| C  | 3.57182  | 0.28824  | -0.57974 |
| C  | 4.81562  | 0.29413  | -1.50616 |
| H  | 5.65967  | -0.23426 | -1.03265 |
| H  | 4.58164  | -0.24217 | -2.44437 |
| H  | 5.10820  | 1.32411  | -1.76255 |
| O  | 2.88166  | 1.34083  | -0.51457 |



$\cdot\text{OAc}$   
 SCF (BP86) Energy = -228.501360687  
 Free Energy 393K = -228.493848  
 Lowest Frequency = 29.2221  $\text{cm}^{-1}$   
 Second Frequency = 394.1986  $\text{cm}^{-1}$

AcOH  
 SCF (BP86) Energy = -229.088709027  
 Free Energy 393K = -229.066909  
 Lowest Frequency = 61.5916  $\text{cm}^{-1}$   
 Second Frequency = 405.1411  $\text{cm}^{-1}$

**a-H**, 2-phenylpyridine  
 SCF (BP86) Energy = -479.337880864  
 Free Energy 393K = -479.223488  
 Lowest Frequency = 40.8265  $\text{cm}^{-1}$   
 Second Frequency = 91.4534  $\text{cm}^{-1}$

Benzene ( $\text{C}_6\text{H}_6$ )  
 SCF (BP86) Energy = -232.242069547  
 Free Energy 393K = -232.182907  
 Lowest Frequency = 397.4291  $\text{cm}^{-1}$   
 Second Frequency = 397.4511  $\text{cm}^{-1}$

MeCN  
 SCF (BP86) Energy = -132.751073488  
 Free Energy 393K = -132.740469  
 Lowest Frequency = 373.9505  $\text{cm}^{-1}$   
 Second Frequency = 373.9931  $\text{cm}^{-1}$

**A**  
 SCF (BP86) Energy = -784.308941980  
 Free Energy 393K = -784.176317  
 Lowest Frequency = 8.5090  $\text{cm}^{-1}$   
 Second Frequency = 52.9166  $\text{cm}^{-1}$

**B<sup>+</sup>**  
 SCF (BP86) Energy = -1034.96464164  
 Free Energy 393K = -1034.723316  
 Lowest Frequency = 26.7464  $\text{cm}^{-1}$   
 Second Frequency = 39.6376  $\text{cm}^{-1}$

TS (**B<sup>+</sup>-C<sup>+</sup>**)  
 SCF (BP86) Energy = -1034.94113282  
 Free Energy 393K = -1034.700230  
 Lowest Frequency = -100.9914  $\text{cm}^{-1}$   
 Second Frequency = 28.4602  $\text{cm}^{-1}$

**C<sup>+</sup>**  
 SCF (BP86) Energy = -1034.96564411  
 Free Energy 393K = -1034.725270  
 Lowest Frequency = 22.7345  $\text{cm}^{-1}$   
 Second Frequency = 23.9119  $\text{cm}^{-1}$

**B**·OAc  
 SCF (BP86) Energy = -1263.62317136  
 Free Energy 393K = -1263.348440  
 Lowest Frequency = 25.6019  $\text{cm}^{-1}$   
 Second Frequency = 37.4342  $\text{cm}^{-1}$

TS (**B-C**)1·OAc  
 SCF (BP86) Energy = -1263.60220672  
 Free Energy 393K = -1263.331145  
 Lowest Frequency = -98.0066  $\text{cm}^{-1}$   
 Second Frequency = 14.9802  $\text{cm}^{-1}$

INT (**B-C**)·OAc  
 SCF (BP86) Energy = -1263.60859226  
 Free Energy 393K = -1263.337931  
 Lowest Frequency = 16.8307  $\text{cm}^{-1}$

Second Frequency = 20.6795  $\text{cm}^{-1}$

TS (**B-C**)2·OAc  
 SCF (BP86) Energy = -1263.60826342  
 Free Energy 393K = -1263.337475  
 Lowest Frequency = -254.6588  $\text{cm}^{-1}$   
 Second Frequency = 17.4296  $\text{cm}^{-1}$

**C**·OAc  
 SCF (BP86) Energy = -1263.62198851  
 Free Energy 393K = -1263.348779  
 Lowest Frequency = 13.2167  $\text{cm}^{-1}$   
 Second Frequency = 26.7650  $\text{cm}^{-1}$

**A**·**a-H**  
 SCF (BP86) Energy = -1263.65263818  
 Free Energy 393K = -1263.383678  
 Lowest Frequency = 10.1879  $\text{cm}^{-1}$   
 Second Frequency = 12.9851  $\text{cm}^{-1}$

**B**  
 SCF (BP86) Energy = -1263.64592624  
 Free Energy 393K = -1263.368954  
 Lowest Frequency = 28.1806  $\text{cm}^{-1}$   
 Second Frequency = 34.0089  $\text{cm}^{-1}$

TS (**B-C**)  
 SCF (BP86) Energy = -1263.59805873  
 Free Energy 393K = -1263.323436  
 Lowest Frequency = -86.5875  $\text{cm}^{-1}$   
 Second Frequency = 23.6666  $\text{cm}^{-1}$

**C**  
 SCF (BP86) Energy = -1263.66809038  
 Free Energy 393K = -1263.392280  
 Lowest Frequency = 23.7543  $\text{cm}^{-1}$   
 Second Frequency = 26.8449  $\text{cm}^{-1}$

**B'**  
 SCF (BP86) Energy = -1031.40787653  
 Free Energy 393K = -1031.215943  
 Lowest Frequency = 35.8296  $\text{cm}^{-1}$   
 Second Frequency = 58.8576  $\text{cm}^{-1}$

TS (**B'-B'**)  
 SCF (BP86) Energy = -1031.37308205  
 Free Energy 393K = -1031.184045  
 Lowest Frequency = -64.5915  $\text{cm}^{-1}$   
 Second Frequency = 11.5338  $\text{cm}^{-1}$

**C'**  
 SCF (BP86) Energy = -1031.36947647  
 Free Energy 393K = -1031.184656  
 Lowest Frequency = 12.1013  $\text{cm}^{-1}$   
 Second Frequency = 23.0938  $\text{cm}^{-1}$

**C'** (without HOAc)  
 SCF (BP86) Energy = -802.265265895  
 Free Energy 393K = -802.125733  
 Lowest Frequency = 33.6630  $\text{cm}^{-1}$   
 Second Frequency = 44.0278  $\text{cm}^{-1}$

**D<sup>+</sup>** ( $\kappa^1$ )  
 SCF (BP86) Energy = -1282.03894895  
 Free Energy 393K = -1281.742706  
 Lowest Frequency = 29.3843  $\text{cm}^{-1}$   
 Second Frequency = 36.3944  $\text{cm}^{-1}$

TS (**D<sup>+</sup>-E<sup>+</sup>**) ( $\kappa^1$ )  
 SCF (BP86) Energy = -1282.03427439

Free Energy 393K = -1281.739891  
 Lowest Frequency = -890.9421 cm<sup>-1</sup>  
 Second Frequency = 33.0601 cm<sup>-1</sup>

**E<sup>+</sup>** ( $\kappa^1$ )

SCF (BP86) Energy = -1282.03838937  
 Free Energy 393K = -1281.741054  
 Lowest Frequency = 31.1664 cm<sup>-1</sup>  
 Second Frequency = 35.4221 cm<sup>-1</sup>

**D<sup>+</sup>** ( $\kappa^2$ )

SCF (BP86) Energy = -1282.05904449  
 Free Energy 393K = -1281.759698  
 Lowest Frequency = 24.2483 cm<sup>-1</sup>  
 Second Frequency = 42.6874 cm<sup>-1</sup>

**TS (D<sup>+</sup>-E<sup>+</sup>)** ( $\kappa^2$ )

SCF (BP86) Energy = -1282.03247464  
 Free Energy 393K = -1281.738554  
 Lowest Frequency = -995.2545 cm<sup>-1</sup>  
 Second Frequency = 22.6884 cm<sup>-1</sup>

**E<sup>+</sup>** ( $\kappa^2$ )

SCF (BP86) Energy = -1282.04711192  
 Free Energy 393K = -1281.750307  
 Lowest Frequency = 26.6438 cm<sup>-1</sup>  
 Second Frequency = 31.9960 cm<sup>-1</sup>

**D**

SCF (BP86) Energy = -1510.76736972  
 Free Energy 393K = -1510.433281  
 Lowest Frequency = 23.7201 cm<sup>-1</sup>  
 Second Frequency = 32.4861 cm<sup>-1</sup>

**TS (D-E)**

SCF (BP86) Energy = -1510.73262187  
 Free Energy 393K = -1510.402800  
 Lowest Frequency = -1053.6288 cm<sup>-1</sup>  
 Second Frequency = 27.2003 cm<sup>-1</sup>

**E**

SCF (BP86) Energy = -1510.75701343  
 Free Energy 393K = -1510.423749  
 Lowest Frequency = 19.9444 cm<sup>-1</sup>  
 Second Frequency = 23.3707 cm<sup>-1</sup>

**E** (without HOAc)

SCF (BP86) Energy = -1281.67152225  
 Free Energy 393K = -1281.384617  
 Lowest Frequency = 30.2612 cm<sup>-1</sup>  
 Second Frequency = 35.7530 cm<sup>-1</sup>

**D<sup>+</sup>** ( $\eta^6$ )

SCF (BP86) Energy = -1282.06544576  
 Free Energy 393K = -1281.770188  
 Lowest Frequency = 9.2296 cm<sup>-1</sup>  
 Second Frequency = 16.3692 cm<sup>-1</sup>

**TS (D<sup>+</sup>-E<sup>+</sup>)** ( $\eta^6$ )

SCF (BP86) Energy = -1282.04288362  
 Free Energy 393K = -1281.746182  
 Lowest Frequency = -102.1099 cm<sup>-1</sup>  
 Second Frequency = 14.3031 cm<sup>-1</sup>

**E<sup>+</sup>** ( $\eta^6$ )

SCF (BP86) Energy = -1282.06784697  
 Free Energy 393K = -1281.770237  
 Lowest Frequency = 17.7257 cm<sup>-1</sup>  
 Second Frequency = 25.9568 cm<sup>-1</sup>

**<sup>3</sup>D<sup>+</sup>**

SCF (BP86) Energy = -1680.38957213  
 Free Energy 393K = -1679.987415  
 Lowest Frequency = 5.7842 cm<sup>-1</sup>  
 Second Frequency = 23.1450 cm<sup>-1</sup>

**INT (<sup>3</sup>D<sup>+</sup>)**

SCF (BP86) Energy = -1680.36814747  
 Free Energy 393K = -1679.964754  
 Lowest Frequency = 23.3930 cm<sup>-1</sup>  
 Second Frequency = 25.4866 cm<sup>-1</sup>

**TS (<sup>3</sup>D<sup>+</sup>-<sup>3</sup>E<sup>+</sup>)**

SCF (BP86) Energy = -1680.35096198  
 Free Energy 393K = -1679.950878  
 Lowest Frequency = -873.7813 cm<sup>-1</sup>  
 Second Frequency = 18.3071 cm<sup>-1</sup>

**<sup>3</sup>E<sup>+</sup>**

SCF (BP86) Energy = -1680.35995727  
 Free Energy 393K = -1679.958757  
 Lowest Frequency = 18.9857 cm<sup>-1</sup>  
 Second Frequency = 22.0690 cm<sup>-1</sup>

**<sup>6</sup>F<sup>2+</sup>**

SCF (BP86) Energy = -891.226975652  
 Free Energy 393K = -891.054235  
 Lowest Frequency = -4.1196 cm<sup>-1</sup>  
 Second Frequency = 3.7482 cm<sup>-1</sup>

**<sup>3</sup>A<sup>2+</sup>**

SCF (BP86) Energy = -725.084942003  
 Free Energy 393K = -724.925239  
 Lowest Frequency = 14.6220 cm<sup>-1</sup>  
 Second Frequency = 18.9704 cm<sup>-1</sup>

**<sup>5</sup>F<sup>+</sup>** ( $\kappa^1$ )

SCF (BP86) Energy = -987.234219220  
 Free Energy 393K = -987.057303  
 Lowest Frequency = 8.9474 cm<sup>-1</sup>  
 Second Frequency = 17.0147 cm<sup>-1</sup>

**<sup>4</sup>F<sup>+</sup>** ( $\kappa^2$ )

SCF (BP86) Energy = -854.470356597  
 Free Energy 393K = -854.325986  
 Lowest Frequency = 16.3263 cm<sup>-1</sup>  
 Second Frequency = 17.1735 cm<sup>-1</sup>

***f*-<sup>3</sup>F** ( $\kappa^2\kappa^1$ )

SCF (BP86) Energy = -950.375149816  
 Free Energy 393K = -950.226828  
 Lowest Frequency = 23.1768 cm<sup>-1</sup>  
 Second Frequency = 36.3363 cm<sup>-1</sup>

***m*-<sup>3</sup>F** ( $\kappa^2\kappa^1$ )

SCF (BP86) Energy = -950.367950843  
 Free Energy 393K = -950.225475  
 Lowest Frequency = 2.5503 cm<sup>-1</sup>  
 Second Frequency = 21.5824 cm<sup>-1</sup>

***c*-<sup>2</sup>F** ( $2\kappa^2$ )

SCF (BP86) Energy = -817.609089806  
 Free Energy 393K = -817.495110  
 Lowest Frequency = 20.8094 cm<sup>-1</sup>  
 Second Frequency = 23.7247 cm<sup>-1</sup>

***t*-<sup>2</sup>F** ( $2\kappa^2$ )

SCF (BP86) Energy = -817.605958390  
 Free Energy 393K = -817.491575  
 Lowest Frequency = -1.9844 cm<sup>-1</sup>

Second Frequency = 5.9946 cm<sup>-1</sup>

**c-4F** (2κ<sup>1</sup>)

SCF (BP86) Energy = -1083.13381667  
Free Energy 393K = -1082.952470  
Lowest Frequency = 30.7708 cm<sup>-1</sup>  
Second Frequency = 31.9410 cm<sup>-1</sup>

**t-4F** (2κ<sup>1</sup>)

SCF (BP86) Energy = -1083.13257282  
Free Energy 393K = -1082.952891  
Lowest Frequency = 22.3020 cm<sup>-1</sup>  
Second Frequency = 24.9120 cm<sup>-1</sup>

**1A**

SCF (BP86) Energy = -917.075823895  
Free Energy 393K = -916.908832  
Lowest Frequency = 8.0027 cm<sup>-1</sup>  
Second Frequency = 42.9119 cm<sup>-1</sup>

**1A+**

SCF (BP86) Energy = -688.369203651  
Free Energy 393K = -688.240375  
Lowest Frequency = 14.5765 cm<sup>-1</sup>  
Second Frequency = 20.7538 cm<sup>-1</sup>

**1B+** (t-O, t-N)

SCF (BP86) Energy = -1167.72294598  
Free Energy 393K = -1167.447011  
Lowest Frequency = 34.4425 cm<sup>-1</sup>  
Second Frequency = 35.4414 cm<sup>-1</sup>

**TS(1B+-1C+)** (t-O, t-N)

SCF (BP86) Energy = -1167.68769362  
Free Energy 393K = -1167.416256  
Lowest Frequency = -844.6082 cm<sup>-1</sup>  
Second Frequency = 27.2943 cm<sup>-1</sup>

**1C+** (t-O, t-N)

SCF (BP86) Energy = -1167.69618734  
Free Energy 393K = -1167.423078  
Lowest Frequency = 19.2265 cm<sup>-1</sup>  
Second Frequency = 31.3465 cm<sup>-1</sup>

**1B+** (t-O, t-C<sub>6</sub>H<sub>6</sub>)

SCF (BP86) Energy = -1167.71349134  
Free Energy 393K = -1167.438709  
Lowest Frequency = 30.5581 cm<sup>-1</sup>  
Second Frequency = 32.7017 cm<sup>-1</sup>

**TS(1B+-1C+)** (t-O, t-C<sub>6</sub>H<sub>6</sub>)

SCF (BP86) Energy = -1167.68971633  
Free Energy 393K = -1167.419716  
Lowest Frequency = -1005.5333 cm<sup>-1</sup>  
Second Frequency = 19.3865 cm<sup>-1</sup>

**1C+** (t-O, t-C<sub>6</sub>H<sub>6</sub>)

SCF (BP86) Energy = -1167.72465823  
Free Energy 393K = -1167.451178  
Lowest Frequency = 22.4613 cm<sup>-1</sup>  
Second Frequency = 30.5848 cm<sup>-1</sup>

**1B+** (t-O, t-O)

SCF (BP86) Energy = -1167.71744568  
Free Energy 393K = -1167.444915  
Lowest Frequency = 20.4934 cm<sup>-1</sup>  
Second Frequency = 21.4590 cm<sup>-1</sup>

**1B+** (t-C<sub>6</sub>H<sub>6</sub>, t-O)

SCF (BP86) Energy = -1167.72161567

Free Energy 393K = -1167.447448

Lowest Frequency = 21.8185 cm<sup>-1</sup>

Second Frequency = 28.6002 cm<sup>-1</sup>

**TS(1B+-1C+)** 1 (t-C<sub>6</sub>H<sub>6</sub>, t-O)

SCF (BP86) Energy = -1167.69108447  
Free Energy 393K = -1167.417865  
Lowest Frequency = -91.3713 cm<sup>-1</sup>  
Second Frequency = 23.8054 cm<sup>-1</sup>

**INT(1B+-1C+)** (t-C<sub>6</sub>H<sub>6</sub>, t-O)

SCF (BP86) Energy = -1167.68848672  
Free Energy 393K = -1167.418594  
Lowest Frequency = 19.9603 cm<sup>-1</sup>  
Second Frequency = 25.7070 cm<sup>-1</sup>

**TS(1B+-1C+)** 2 (t-C<sub>6</sub>H<sub>6</sub>, t-O)

SCF (BP86) Energy = -1167.68832141  
Free Energy 393K = -1167.418609  
Lowest Frequency = -240.3765 cm<sup>-1</sup>  
Second Frequency = 20.2290 cm<sup>-1</sup>

**1C+** (t-C<sub>6</sub>H<sub>6</sub>, t-O)

SCF (BP86) Energy = -1167.70548939  
Free Energy 393K = -1167.434191  
Lowest Frequency = 15.7244 cm<sup>-1</sup>  
Second Frequency = 25.6284 cm<sup>-1</sup>

**1B+** (t-N, t-O)

SCF (BP86) Energy = -1167.72106214  
Free Energy 393K = -1167.446449  
Lowest Frequency = 22.3355 cm<sup>-1</sup>  
Second Frequency = 25.9615 cm<sup>-1</sup>

**TS(1B+-1C+)** (t-N, t-O)

SCF (BP86) Energy = -1167.69403569  
Free Energy 393K = -1167.420498  
Lowest Frequency = -115.9387 cm<sup>-1</sup>  
Second Frequency = 24.5977 cm<sup>-1</sup>

**1C+** (t-N, t-O)

SCF (BP86) Energy = -1167.73105755  
Free Energy 393K = -1167.456594  
Lowest Frequency = 23.6990 cm<sup>-1</sup>  
Second Frequency = 33.5988 cm<sup>-1</sup>

**4G+** (κ<sup>1</sup>)

SCF (BP86) Energy = -1333.81273065  
Free Energy 393K = -1333.522977  
Lowest Frequency = 9.4918 cm<sup>-1</sup>  
Second Frequency = 17.2099 cm<sup>-1</sup>

**3G** (2κ<sup>1</sup>)

SCF (BP86) Energy = -1429.71423532  
Free Energy 393K = -1429.420933  
Lowest Frequency = 18.7942 cm<sup>-1</sup>  
Second Frequency = 29.6300 cm<sup>-1</sup>

**1G** (2κ<sup>2</sup>)

SCF (BP86) Energy = -1164.19014654  
Free Energy 393K = -1163.968504  
Lowest Frequency = 4.3996 cm<sup>-1</sup>  
Second Frequency = 30.5514 cm<sup>-1</sup>

**2G+** (κ<sup>2</sup>)

SCF (BP86) Energy = -1068.27102327  
Free Energy 393K = -1068.049841  
Lowest Frequency = 19.4187 cm<sup>-1</sup>  
Second Frequency = 23.0992 cm<sup>-1</sup>

**<sup>3</sup>G<sup>+</sup>** ( $\kappa^2$ )

SCF (BP86) Energy = -1201.03658211  
 Free Energy 393K = -1200.781064  
 Lowest Frequency = 18.9178 cm<sup>-1</sup>  
 Second Frequency = 23.9391 cm<sup>-1</sup>

**<sup>1</sup>G** ( $\kappa^2\kappa^1$ )

SCF (BP86) Energy = -1164.18926443  
 Free Energy 393K = -1163.966520  
 Lowest Frequency = 21.5009 cm<sup>-1</sup>  
 Second Frequency = 31.2083 cm<sup>-1</sup>

TS (**<sup>1</sup>G-<sup>1</sup>H**)

SCF (BP86) Energy = -1164.18761054  
 Free Energy 393K = -1163.966856  
 Lowest Frequency = -656.6522 cm<sup>-1</sup>  
 Second Frequency = 23.0147 cm<sup>-1</sup>

**<sup>1</sup>H**

SCF (BP86) Energy = -1164.19893635  
 Free Energy 393K = -1163.977379  
 Lowest Frequency = 18.0223 cm<sup>-1</sup>  
 Second Frequency = 19.6428 cm<sup>-1</sup>

**<sup>2</sup>G** ( $\kappa^2\kappa^1$ )

SCF (BP86) Energy = -1296.95420397  
 Free Energy 393K = -1296.697602  
 Lowest Frequency = 29.6859 cm<sup>-1</sup>  
 Second Frequency = 32.8414 cm<sup>-1</sup>

TS (**<sup>2</sup>G-<sup>2</sup>H**)

SCF (BP86) Energy = -1296.95136610  
 Free Energy 393K = -1296.696199  
 Lowest Frequency = -789.9532 cm<sup>-1</sup>  
 Second Frequency = 33.6754 cm<sup>-1</sup>

**<sup>2</sup>H**

SCF (BP86) Energy = -1296.95983158  
 Free Energy 393K = -1296.702236  
 Lowest Frequency = 29.1975 cm<sup>-1</sup>  
 Second Frequency = 29.9685 cm<sup>-1</sup>

<sup>-</sup>OMes

SCF (BP86) Energy = -538.202534223  
 Free Energy 393K = -538.080444  
 Lowest Frequency = 40.8103 cm<sup>-1</sup>  
 Second Frequency = 76.0025 cm<sup>-1</sup>

[(C<sub>6</sub>H<sub>6</sub>)Ru(OMes)]<sup>+</sup>

SCF (BP86) Energy = -865.249489757  
 Free Energy 393K = -865.040896  
 Lowest Frequency = 20.1617 cm<sup>-1</sup>  
 Second Frequency = 27.7357 cm<sup>-1</sup>

[(C<sub>6</sub>H<sub>6</sub>)Ru(OMes)<sub>2</sub>]

SCF (BP86) Energy = -1403.66917957  
 Free Energy 393K = -1403.309293  
 Lowest Frequency = 10.8485 cm<sup>-1</sup>  
 Second Frequency = 15.4587 cm<sup>-1</sup>

<sup>-</sup>O<sup>t</sup>Bu

SCF (BP86) Energy = -346.450213517  
 Free Energy 393K = -346.365698  
 Lowest Frequency = -27.2251 cm<sup>-1</sup>  
 Second Frequency = 205.8483 cm<sup>-1</sup>

[(C<sub>6</sub>H<sub>6</sub>)Ru(O<sup>t</sup>Bu)]<sup>+</sup>

SCF (BP86) Energy = -673.494518023  
 Free Energy 393K = -673.326655  
 Lowest Frequency = 10.9105 cm<sup>-1</sup>  
 Second Frequency = 38.1463 cm<sup>-1</sup>

[(C<sub>6</sub>H<sub>6</sub>)Ru(O<sup>t</sup>Bu)<sub>2</sub>]

SCF (BP86) Energy = -1020.18455813  
 Free Energy 393K = -1019.903725  
 Lowest Frequency = 8.8349 cm<sup>-1</sup>  
 Second Frequency = 16.5325 cm<sup>-1</sup>

[(C<sub>6</sub>H<sub>6</sub>)Ru(OAc)]

SCF (BP86) Energy = -555.552331451  
 Free Energy 393K = -555.457985  
 Lowest Frequency = 30.6692 cm<sup>-1</sup>  
 Second Frequency = 46.2171 cm<sup>-1</sup>

## Toluene (tol)

SCF (BP86) Energy = -271.559258208  
 Free Energy 393K = -271.478745  
 Lowest Frequency = 28.9236 cm<sup>-1</sup>  
 Second Frequency = 202.7212 cm<sup>-1</sup>

[(tol)Ru(OAc)<sub>2</sub>]

SCF (BP86) Energy = -823.628702031  
 Free Energy 393K = -823.471582  
 Lowest Frequency = 24.7351 cm<sup>-1</sup>  
 Second Frequency = 54.4596 cm<sup>-1</sup>

*o*-xylene (*o*-xyl)

SCF (BP86) Energy = -310.876056618  
 Free Energy 393K = -310.769909  
 Lowest Frequency = 132.8541 cm<sup>-1</sup>  
 Second Frequency = 155.6287 cm<sup>-1</sup>

[(*o*-xyl)Ru(OAc)<sub>2</sub>]

SCF (BP86) Energy = -862.944926979  
 Free Energy 393K = -862.766848  
 Lowest Frequency = 5.2150 cm<sup>-1</sup>  
 Second Frequency = 53.0386 cm<sup>-1</sup>

*p*-cymene (*p*-cym)

SCF (BP86) Energy = -389.500963444  
 Free Energy 393K = -389.348456  
 Lowest Frequency = 27.5360 cm<sup>-1</sup>  
 Second Frequency = 39.1081 cm<sup>-1</sup>

[(*p*-cym)Ru(OAc)<sub>2</sub>]

SCF (BP86) Energy = -941.573231536  
 Free Energy 393K = -941.343107  
 Lowest Frequency = 23.7827 cm<sup>-1</sup>  
 Second Frequency = 38.7127 cm<sup>-1</sup>

C<sub>6</sub>Me<sub>6</sub> (Bn\*)

SCF (BP86) Energy = -468.126900997  
 Free Energy 393K = -467.931152  
 Lowest Frequency = 39.6292 cm<sup>-1</sup>  
 Second Frequency = 54.9209 cm<sup>-1</sup>

[(Bn\*)Ru(OAc)<sub>2</sub>]

## XYZ Coordinates and Computed Energies

## SCF and Free Energies at 393.15 K

SCF (BP86) Energy = -1020.20321510

Free Energy 393K = -1019.926679

Lowest Frequency = 26.4277  $\text{cm}^{-1}$

Second Frequency = 45.4342  $\text{cm}^{-1}$

## XYZ Coordinates and Computed Energies

## B3LYP Optimised Geometries and Energies

<sup>-</sup>OAc (\* single point)  
 SCF (B3LYP) Energy = -228.496852530  
 Enthalpy 0K = -228.448903  
 Enthalpy 298K = -228.443902  
 Free Energy 298K = -228.475153  
 Lowest Frequency = 257.5981 cm<sup>-1</sup>  
 Second Frequency = 432.8976 cm<sup>-1</sup>

AcOH  
 SCF (B3LYP) Energy = -229.087408880  
 Enthalpy 0K = -229.025401  
 Enthalpy 298K = -229.019902  
 Free Energy 298K = -229.052543  
 Lowest Frequency = 77.3824 cm<sup>-1</sup>  
 Second Frequency = 419.5733 cm<sup>-1</sup>

O -0.77943 -1.04551 -0.00011  
 H -1.72070 -0.80361 -0.00036  
 C -0.09256 0.12511 0.00041  
 O -0.64408 1.20247 -0.00010  
 C 1.39696 -0.11065 -0.00001  
 H 1.68318 -0.69263 0.88110  
 H 1.68270 -0.69285 -0.88114  
 H 1.91652 0.84661 -0.00028

**a-H**, 2-phenylpyridine  
 SCF (B3LYP) Energy = -479.348941685  
 Enthalpy 0K = -479.179008  
 Enthalpy 298K = -479.169290  
 Free Energy 298K = -479.213774  
 Lowest Frequency = 45.3882 cm<sup>-1</sup>  
 Second Frequency = 95.9752 cm<sup>-1</sup>

N -1.36715 -1.15785 -0.20136  
 C -2.70085 -1.20482 -0.20910  
 C -3.51897 -0.08968 -0.02298  
 H -3.14130 -2.18704 -0.37525  
 H -4.59963 -0.18653 -0.04448  
 C 0.72524 0.02777 -0.00462  
 C 1.47063 1.20195 -0.20138  
 C 2.81013 -1.20765 0.19767  
 C 2.86456 1.17246 -0.19297  
 H 0.96559 2.14449 -0.38839  
 C 3.54063 -0.03163 0.01074  
 H 3.32759 -2.15018 0.35353  
 H 3.42238 2.09068 -0.35381  
 H 4.62666 -0.05409 0.01818  
 C -0.76305 0.03000 -0.00072  
 C -2.89916 1.13895 0.20044  
 H -3.48889 2.03582 0.36832  
 C -1.50905 1.20172 0.21782  
 H -1.01093 2.14328 0.41951  
 C 1.41778 -1.17972 0.18651  
 H 0.84139 -2.08753 0.32347

Benzene (C<sub>6</sub>H<sub>6</sub>)  
 SCF (B3LYP) Energy = -232.252444239  
 Enthalpy 0K = -232.152638  
 Enthalpy 298K = -232.147379  
 Free Energy 298K = -232.180078  
 Lowest Frequency = 432.6362 cm<sup>-1</sup>  
 Second Frequency = 432.6589 cm<sup>-1</sup>

C 0.00000 1.40481 0.00000  
 C -1.21659 0.70239 0.00000  
 C -1.21659 -0.70239 0.00000  
 C 0.00000 -1.40480 0.00000  
 C 1.21659 -0.70239 0.00000  
 C 1.21658 0.70240 0.00000  
 H -2.16519 1.25006 0.00000

H -2.16518 -1.25007 0.00000  
 H 0.00001 -2.50014 0.00000  
 H 2.16519 -1.25006 0.00000  
 H 2.16518 1.25007 0.00000  
 H -0.00001 2.50001 0.00000

MeCN  
 SCF (B3LYP) Energy = -132.755637557  
 Enthalpy 0K = -132.710201  
 Enthalpy 298K = -132.705658  
 Free Energy 298K = -132.734217  
 Lowest Frequency = 387.0631 cm<sup>-1</sup>  
 Second Frequency = 387.0843 cm<sup>-1</sup>

C 0.00001 -1.18046 0.00000  
 H -1.02585 -1.55954 0.00000  
 H 0.51294 -1.55953 0.88842  
 H 0.51294 -1.55953 -0.88842  
 C 0.00000 0.28001 0.00000  
 N -0.00001 1.44019 0.00000

**A**  
 SCF (B3LYP) Energy = -784.206320951  
 Enthalpy 0K = -783.999965  
 Enthalpy 298K = -783.983254  
 Free Energy 298K = -784.045019  
 Lowest Frequency = 14.9029 cm<sup>-1</sup>  
 Second Frequency = 59.3099 cm<sup>-1</sup>

C 1.87318 -0.72673 1.41961  
 C 2.49806 0.34739 0.70106  
 C 2.49534 0.34199 -0.71029  
 C 1.86981 -0.73828 -1.41927  
 C 1.27544 -1.80537 -0.71153  
 C 1.27695 -1.79975 0.72211  
 Ru 0.40909 0.10709 -0.00083  
 O -0.40928 1.77397 -1.00827  
 C -0.78777 2.31782 0.00130  
 C -1.66960 3.53212 0.00225  
 H 2.87959 1.19561 -1.25702  
 H 0.71140 -2.55811 1.24571  
 O -1.57444 -0.41053 -0.00575  
 C -2.05459 -1.63010 0.00006  
 O -1.40050 -2.67317 0.00813  
 O -0.41297 1.76963 1.09003  
 C -3.57931 -1.64702 -0.00382  
 H -3.95987 -1.11807 0.87521  
 H -3.95578 -1.12179 -0.88680  
 H -3.94157 -2.67565 -0.00226  
 H -2.71403 3.20264 -0.00055  
 H -1.49850 4.12645 0.90173  
 H -1.49498 4.13036 -0.89396  
 H 1.78912 -0.67080 2.49937  
 H 0.70845 -2.56779 -1.22765  
 H 1.78369 -0.69123 -2.49926  
 H 2.88463 1.20486 1.24003

**B<sup>+</sup>**  
 SCF (B3LYP) Energy = -1034.87824638  
 Enthalpy 0K = -1034.550636  
 Enthalpy 298K = -1034.529100  
 Free Energy 298K = -1034.601619  
 Lowest Frequency = 20.1662 cm<sup>-1</sup>  
 Second Frequency = 40.2229 cm<sup>-1</sup>

C -0.07344 -2.30152 -0.68524  
 C -2.81859 -1.43876 1.93136  
 C -3.84290 -1.93324 1.11914  
 C -4.09547 -1.33871 -0.11965  
 C -2.27605 0.22945 0.25660

## XYZ Coordinates and Computed Energies

```

C -1.52248  3.73283 -0.92697
O  1.07992 -0.08398  1.90223
C  2.06296  0.72407  1.79669
O  2.52804  0.88107  0.61335
C  2.61878  1.46473  2.97025
H -2.06271  4.64982 -1.13989
H  2.42227  0.91604  3.89257
H  3.69032  1.62724  2.83969
H  2.13225  2.44415  3.03949
H -4.89757 -1.70937 -0.75034
H -4.45133 -2.76682  1.45620
H -2.63554 -1.88111  2.90597
C  0.50297  2.46970 -0.78394
H  1.57744  2.37806 -0.87680
C -0.13831  3.66497 -1.07471
H  0.44420  4.51629 -1.40830
C -1.50425  1.41535 -0.20614
Ru  1.06658 -0.42667 -0.21423
C  2.37118 -1.31995 -1.75063
H  3.29599 -0.87449 -2.10191
C  2.39475 -2.18072 -0.60890
H  3.33171 -2.39571 -0.10874
C  1.17286 -2.64116 -0.06973
H  1.17401 -3.19844  0.86101
C  1.14727 -0.98272 -2.37933
H  1.13578 -0.30416 -3.22409
C -0.07479 -1.47759 -1.83200
H -1.02111 -1.15421 -2.24975
H -1.00842 -2.61265 -0.23599
C -2.19874  2.60101 -0.48745
H -3.27158  2.61779 -0.33426
C -3.32518 -0.25461 -0.54332
H -3.53471  0.21584 -1.50051
N -0.15235  1.35840 -0.36739
C -2.03458 -0.36546  1.50517
H -1.24345  0.01338  2.14161

```

**TS (B<sup>+</sup>-C<sup>+</sup>)**

```

SCF (B3LYP) Energy = -1034.85234568
Enthalpy 0K = -1034.526184
Enthalpy 298K = -1034.504951
Free Energy 298K = -1034.577054
Lowest Frequency = -69.6633 cm-1
Second Frequency = 25.8127 cm-1

```

```

C  0.36172  2.69270 -0.51792
N  0.67025  1.40602 -0.26623
C  1.94151  1.06895  0.07462
C  2.94886  2.03823  0.10638
C  2.63935  3.36230 -0.19121
C  1.31988  3.69866 -0.49692
Ru -0.79231 -0.14133 -0.40704
C -2.67947 -1.19313 -1.00402
C -2.45896 -0.01494 -1.78829
C -1.24191  0.14414 -2.50919
C -0.23960 -0.88064 -2.47486
C -0.43634 -1.99948 -1.65078
C -1.65861 -2.15272 -0.90707
H -1.06224  1.05854 -3.06457
C  2.15781 -0.34476  0.44235
C  3.31627 -1.04526  0.08304
C  3.45300 -2.39166  0.42812
C  2.44265 -3.05306  1.13621
C  1.28728 -2.36277  1.50395
C  1.14259 -1.01337  1.15942
H -1.76289 -2.97787 -0.21213
O -1.76636  1.12656  0.91281
C -2.07895  0.53049  2.04134
O -1.75977 -0.63982  2.28024
C -2.82674  1.39807  3.03020

```

## B3LYP Optimised Geometries and Energies

```

H -2.11915  2.07726  3.51770
H -3.57776  2.01039  2.52617
H -3.29228  0.77207  3.79177
H  4.09945 -0.55011 -0.48314
H  4.35308 -2.92760  0.14317
H  0.50757 -2.84548  2.08482
H  2.56783 -4.09532  1.41229
H  3.95345  1.75071  0.39492
H  0.30549 -0.46971  1.61149
H -3.56890 -1.28102 -0.39157
H  0.36192 -2.72046 -1.51749
H -3.18914  0.78633 -1.77745
H  0.70007 -0.74164 -2.99717
H  1.02953  4.72087 -0.71102
H  3.41149  4.12438 -0.16373
H -0.68056  2.90076 -0.72727

```

**C<sup>+</sup>**

```

SCF (B3LYP) Energy = -1034.87433790
Enthalpy 0K = -1034.547080
Enthalpy 298K = -1034.525448
Free Energy 298K = -1034.597821
Lowest Frequency = 27.3950 cm-1
Second Frequency = 32.2787 cm-1

```

```

C  0.44938  2.74317  0.11881
N  0.62901  1.43921 -0.17116
C  1.88343  0.96634 -0.42170
C  2.97729  1.84278 -0.41082
C  2.78550  3.19052 -0.13522
C  1.49684  3.65295  0.14347
Ru -0.94649  0.03928 -0.20408
C -3.07306 -0.74043 -0.03780
C -3.23761  0.68876 -0.02952
C -2.65390  1.45412 -1.03670
C -1.87233  0.80837 -2.05774
C -1.80432 -0.60421 -2.12655
C -2.43453 -1.39086 -1.11065
H -2.73333  2.53589 -1.02117
C  1.93945 -0.47808 -0.65068
C  3.12160 -1.17200 -0.94751
C  3.10129 -2.55525 -1.11192
C  1.89869 -3.24830 -0.96981
C  0.71353 -2.55853 -0.67912
C  0.69754 -1.16078 -0.52458
H -2.36395 -2.47151 -1.13084
O -0.69618  0.04833  1.95062
C -0.09579 -0.66654  2.77055
O  0.66422 -1.68560  2.43540
C -0.18987 -0.42506  4.24636
H  0.80505 -0.19392  4.63920
H -0.87296  0.39717  4.45260
H -0.52958 -1.33708  4.74563
H  4.06310 -0.64102 -1.05121
H  4.01775 -3.08856 -1.34180
H -0.20396 -3.13116 -0.57379
H  1.87593 -4.32796 -1.08661
H  3.97180  1.46278 -0.61103
H  0.71276 -1.76563  1.45287
H -3.47038 -1.32631  0.78398
H -1.24237 -1.08386 -2.91913
H -3.75766  1.16532  0.79391
H -1.35792  1.40622 -2.80189
H  1.30233  4.69358  0.37603
H  3.62984  3.87236 -0.12877
H -0.56706  3.04739  0.33832

```

**B•OAc**

```

SCF (B3LYP) Energy = -1263.53369533
Enthalpy 0K = -1263.156538

```

## XYZ Coordinates and Computed Energies

Enthalpy 298K = -1263.128981  
 Free Energy 298K = -1263.215992  
 Lowest Frequency = 28.4306 cm<sup>-1</sup>  
 Second Frequency = 39.5624 cm<sup>-1</sup>

C -0.48864 -1.70153 1.57788  
 N -0.25958 -0.48546 1.03312  
 C -1.09976 0.53790 1.33512  
 C -2.17126 0.33621 2.21377  
 C -2.39449 -0.91190 2.78090  
 C -1.53207 -1.95463 2.45472  
 Ru 1.28675 -0.43601 -0.46679  
 C 2.51532 -0.77604 -2.28866  
 C 1.51478 -1.79572 -2.17289  
 C 0.14156 -1.46118 -2.08456  
 C -0.24509 -0.08716 -2.06859  
 C 0.73133 0.93321 -2.13678  
 C 2.11642 0.58038 -2.24064  
 H -0.65780 -2.18056 -1.87625  
 C -0.91352 1.89203 0.73990  
 C -1.92675 2.40543 -0.08689  
 C -1.80367 3.69346 -0.61212  
 C -0.68838 4.47879 -0.30892  
 C 0.31348 3.97092 0.52219  
 C 0.20429 2.68195 1.04676  
 H 2.87276 1.35771 -2.19988  
 O 2.40701 -1.61567 0.94600  
 C 2.86305 -0.56872 1.51792  
 O 2.53801 0.55563 1.01696  
 C 3.71419 -0.66502 2.75140  
 H 4.35869 0.21137 2.83770  
 H 3.06339 -0.70392 3.63191  
 H 4.31020 -1.57933 2.72886  
 H -2.76091 1.76020 -0.35423  
 H -2.58246 4.08162 -1.26254  
 H 1.17889 4.57947 0.76936  
 H -0.60185 5.48326 -0.71428  
 H -2.82064 1.17558 2.43241  
 H 0.98785 2.28723 1.68371  
 H 3.56709 -1.03807 -2.30397  
 H 0.44518 1.97297 -2.02984  
 H 1.82571 -2.83140 -2.07668  
 H -1.31042 0.10184 -1.85120  
 H -1.66856 -2.95616 2.84572  
 H -3.22993 -1.06872 3.45621  
 H 0.19495 -2.48695 1.28567  
 O -2.43076 -2.41828 -0.99902  
 C -3.25625 -1.46936 -0.92293  
 C -4.69444 -1.81453 -0.49092  
 H -4.78984 -2.86880 -0.22159  
 H -4.99454 -1.18629 0.35515  
 H -5.38510 -1.58818 -1.31090  
 O -3.03963 -0.24259 -1.17376

## TS (B-C) 1 • OAc

SCF (B3LYP) Energy = -1263.51018151  
 Enthalpy 0K = -1263.134741  
 Enthalpy 298K = -1263.108223  
 Free Energy 298K = -1263.194298  
 Lowest Frequency = -61.0679 cm<sup>-1</sup>  
 Second Frequency = -7.2365 cm<sup>-1</sup>

C -1.39333 -1.17752 1.51778  
 N -0.66461 -0.17837 0.99725  
 C -0.95749 1.10778 1.31377  
 C -2.00773 1.41029 2.17801  
 C -2.76498 0.37407 2.72188  
 C -2.44929 -0.93943 2.39283  
 Ru 0.87227 -0.55354 -0.43006  
 C 2.04182 -1.57642 -2.02582

## B3LYP Optimised Geometries and Energies

C 0.81224 -2.26330 -1.74773  
 C -0.43227 -1.57908 -1.83725  
 C -0.46743 -0.19353 -2.20685  
 C 0.74117 0.49200 -2.41346  
 C 2.00104 -0.20087 -2.31865  
 H -1.39352 -2.00694 -1.50642  
 C -0.08556 2.13771 0.71067  
 C -0.60919 3.32348 0.17833  
 C 0.23944 4.25195 -0.42566  
 C 1.61629 4.01234 -0.50628  
 C 2.14563 2.83388 0.01924  
 C 1.30015 1.89812 0.62625  
 H 2.92839 0.35691 -2.38956  
 O 1.62093 -1.72843 1.12869  
 C 2.81044 -1.37496 1.52811  
 O 3.42500 -0.39943 1.07454  
 C 3.38717 -2.24796 2.62986  
 H 2.83426 -2.07227 3.55857  
 H 3.27501 -3.30633 2.38013  
 H 4.43866 -2.00598 2.78776  
 H -1.68084 3.49381 0.19969  
 H -0.17686 5.16359 -0.84423  
 H 3.21222 2.63431 -0.01624  
 H 2.26862 4.74570 -0.97114  
 H -2.21236 2.44591 2.42400  
 H 1.76567 1.04380 1.12508  
 H 2.99391 -2.07298 -1.87906  
 H 0.73986 1.56702 -2.55683  
 H 0.84197 -3.28637 -1.38834  
 H -1.44857 0.29283 -2.11224  
 H -3.02035 -1.77713 2.77456  
 H -3.58807 0.59339 3.39481  
 H -1.12023 -2.17964 1.22062  
 O -3.12355 -1.86927 -0.74302  
 C -3.69259 -0.74481 -0.88005  
 C -5.19833 -0.68664 -0.55833  
 H -5.74013 -0.23119 -1.39352  
 H -5.60362 -1.67976 -0.35193  
 H -5.36280 -0.04179 0.31333  
 O -3.16014 0.34523 -1.23608

## INT (B-C) • OAc

SCF (B3LYP) Energy = -1263.51241253  
 Enthalpy 0K = -1263.136403  
 Enthalpy 298K = -1263.108424  
 Free Energy 298K = -1263.197922  
 Lowest Frequency = 18.7437 cm<sup>-1</sup>  
 Second Frequency = 27.6727 cm<sup>-1</sup>

C -1.57721 1.22997 1.07742  
 N -0.33113 1.08380 0.59428  
 C 0.56085 2.10701 0.65993  
 C 0.20041 3.33030 1.22163  
 C -1.09084 3.49484 1.72643  
 C -1.98510 2.43408 1.65441  
 Ru 0.29522 -0.73848 -0.29687  
 C 0.92312 -2.42947 -1.63628  
 C -0.30848 -2.74585 -1.02792  
 C -1.40705 -1.83081 -1.09780  
 C -1.27557 -0.61575 -1.83675  
 C -0.04585 -0.30279 -2.47994  
 C 1.05600 -1.18073 -2.32656  
 H -2.32671 -1.95404 -0.52712  
 C 1.90695 1.83079 0.10996  
 C 2.62397 2.79365 -0.61387  
 C 3.86964 2.48001 -1.15937  
 C 4.42024 1.20395 -0.99538  
 C 3.71853 0.23785 -0.27562  
 C 2.46933 0.54839 0.27430  
 H 2.03236 -0.88488 -2.69613



## XYZ Coordinates and Computed Energies

```
O 0.18009 -1.37598 1.67785
C 1.10636 -2.19108 2.12040
O 2.12703 -2.49748 1.49654
C 0.81464 -2.72926 3.51256
H 0.65902 -1.90070 4.20946
H -0.11079 -3.31308 3.49694
H 1.64097 -3.35360 3.85373
H 2.19461 3.77790 -0.77429
H 4.41160 3.23469 -1.72186
H 4.13151 -0.75177 -0.10719
H 5.39344 0.97323 -1.41793
H 0.93160 4.12887 1.27908
H 2.03415 -0.17677 0.96989
H 1.78901 -3.06033 -1.47910
H 0.08271 0.64977 -2.98118
H -0.38195 -3.62753 -0.40055
H -2.10964 0.10806 -1.76809
H -3.00239 2.51919 2.01823
H -1.38614 4.44133 2.16910
H -2.26662 0.38887 0.95808
O -3.80081 -0.65459 0.23568
C -4.28853 0.26622 -0.49097
C -5.81493 0.44341 -0.43901
H -6.29071 -0.37652 -0.98997
H -6.17127 0.38189 0.59371
H -6.12022 1.38999 -0.89074
O -3.63947 1.03599 -1.25472
```

## TS (B-C) 2 • OAc

```
SCF (B3LYP) Energy = -1263.50531182
Enthalpy 0K = -1263.133583
Enthalpy 298K = -1263.106547
Free Energy 298K = -1263.193083
Lowest Frequency = -925.8672 cm-1
Second Frequency = 17.9574 cm-1
```

```
C -1.46030 1.45766 0.65195
N -0.23146 1.10837 0.23064
C 0.72009 2.05497 -0.01002
C 0.43373 3.40586 0.18857
C -0.83565 3.78016 0.62863
C -1.79101 2.79707 0.86109
Ru 0.28930 -0.90073 -0.10919
C 0.69478 -2.97244 -0.92744
C -0.54643 -2.98183 -0.24641
C -1.58675 -2.07014 -0.59051
C -1.36442 -1.11359 -1.61291
C -0.11938 -1.08427 -2.31054
C 0.90422 -1.99540 -1.94863
H -2.50651 -1.97236 -0.01594
C 2.01633 1.52140 -0.45508
C 2.95784 2.28557 -1.15431
C 4.15766 1.70772 -1.56933
C 4.42897 0.36566 -1.28346
C 3.49106 -0.39816 -0.59017
C 2.26155 0.14896 -0.17274
H 1.87944 -1.91816 -2.41660
O 0.06029 -1.09808 1.97683
C 0.99212 -0.77165 2.78312
O 2.10043 -0.28983 2.41187
C 0.74520 -0.98125 4.25925
H 0.84617 -0.02450 4.77931
H -0.24751 -1.39588 4.43229
H 1.50935 -1.65283 4.66118
H 2.74975 3.32283 -1.40008
H 4.88265 2.30524 -2.11414
H 3.72442 -1.42940 -0.33589
H 5.37214 -0.07584 -1.59281
H 1.20363 4.14923 0.01661
H 2.02380 -0.20226 1.05561
```

## B3LYP Optimised Geometries and Energies

```
H 1.49187 -3.64746 -0.63899
H 0.06907 -0.32688 -3.06286
H -0.67684 -3.63800 0.60810
H -2.14138 -0.34166 -1.75647
H -2.79650 3.04093 1.18340
H -1.06979 4.82896 0.78486
H -2.19990 0.66077 0.77891
O -3.85238 -0.39696 0.44236
C -4.30095 0.30670 -0.51553
C -5.81336 0.58882 -0.50656
H -6.34890 -0.31503 -0.82080
H -6.15280 0.82494 0.50648
H -6.06964 1.39960 -1.19247
O -3.62872 0.78118 -1.47404
```

## C•OAc

```
SCF (B3LYP) Energy = -1263.52476102
Enthalpy 0K = -1263.147983
Enthalpy 298K = -1263.120362
Free Energy 298K = -1263.208788
Lowest Frequency = 11.1401 cm-1
Second Frequency = 24.4206 cm-1
```

```
C -1.46894 1.52022 0.49711
N -0.26171 1.12748 0.04795
C 0.68364 2.04888 -0.30144
C 0.40460 3.41312 -0.19939
C -0.84426 3.82889 0.25907
C -1.78952 2.87258 0.61371
Ru 0.25301 -0.90444 -0.14513
C 0.41287 -3.13071 -0.55046
C -0.76001 -2.93441 0.24497
C -1.79147 -2.06454 -0.15938
C -1.61341 -1.29721 -1.34468
C -0.45928 -1.47577 -2.16050
C 0.54993 -2.39988 -1.75623
H -2.65759 -1.82919 0.45795
C 1.95578 1.46037 -0.73913
C 3.05364 2.21601 -1.17392
C 4.24200 1.58504 -1.53825
C 4.33761 0.19481 -1.45776
C 3.23965 -0.56238 -1.03093
C 2.01665 0.03903 -0.67444
H 1.45537 -2.49806 -2.34528
O 0.64491 -0.80610 1.99962
C 1.61477 -0.47586 2.69121
O 2.77288 -0.08301 2.19625
C 1.56108 -0.49420 4.19116
H 1.69914 0.52326 4.56968
H 0.60118 -0.88569 4.52419
H 2.38058 -1.10281 4.58374
H 2.98906 3.29894 -1.23205
H 5.08903 2.17505 -1.87486
H 3.34426 -1.64375 -0.97489
H 5.26454 -0.30378 -1.72913
H 1.15942 4.14075 -0.47414
H 2.71672 -0.07797 1.20825
H 1.19717 -3.80255 -0.22123
H -0.32665 -0.88504 -3.05953
H -0.82410 -3.42690 1.21080
H -2.37115 -0.52559 -1.55362
H -2.77990 3.14304 0.96057
H -1.07111 4.88844 0.33331
H -2.20780 0.74983 0.74095
O -3.93327 -0.20665 0.84114
C -4.47049 0.32668 -0.18062
C -5.97785 0.62248 -0.08035
H -6.53639 -0.31081 -0.22136
H -6.23067 1.00021 0.91489
H -6.29368 1.33193 -0.84892
```

## XYZ Coordinates and Computed Energies

O -3.89448 0.61888 -1.26420

**A•a-H**

SCF (B3LYP) Energy = -1263.56358218  
 Enthalpy 0K = -1263.186380  
 Enthalpy 298K = -1263.158587  
 Free Energy 298K = -1263.250416  
 Lowest Frequency = 9.1340 cm<sup>-1</sup>  
 Second Frequency = 11.9010 cm<sup>-1</sup>

C 1.87413 1.34051 -2.07956  
 C 0.58767 0.73528 -1.92762  
 C 0.47858 -0.67736 -1.92500  
 C -2.14121 -1.59981 0.71203  
 C -2.00545 -2.98875 0.73127  
 H -1.09968 -3.42421 1.14314  
 C -2.39564 1.36666 0.33165  
 H -1.39745 1.00224 0.54154  
 O 1.88757 1.27394 1.11431  
 C 1.41466 3.19847 2.39008  
 H 2.44337 3.17048 2.75825  
 H 1.08786 4.23077 2.25836  
 H 0.78412 2.71570 3.14429  
 C 1.29766 2.43988 1.07286  
 O 0.68334 2.91295 0.11242  
 O 3.42292 -0.93694 0.94440  
 C 2.49943 -1.44673 1.65861  
 O 1.30624 -1.37485 1.20912  
 H -1.33521 -1.00109 1.12194  
 C 2.79523 -2.07269 2.98976  
 H 2.73987 -1.29516 3.75912  
 H 2.05659 -2.84167 3.22336  
 H 3.80307 -2.49189 2.99698  
 C -3.02530 -3.80444 0.23756  
 H -2.91971 -4.88570 0.25517  
 C -3.30140 -0.99835 0.19231  
 C -4.32425 -1.83157 -0.29297  
 H -5.22265 -1.36667 -0.68250  
 C -4.18664 -3.21765 -0.27184  
 H -4.98891 -3.84263 -0.65477  
 N -4.70809 0.93540 -0.14482  
 C -2.60867 2.73985 0.23620  
 H -1.76779 3.41501 0.36305  
 C -3.46994 0.48168 0.13545  
 C -3.89418 3.20182 -0.04378  
 H -4.11237 4.26180 -0.12792  
 C -4.90245 2.25367 -0.22455  
 H -5.92043 2.57069 -0.44857  
 Ru 1.96148 -0.11173 -0.40477  
 C 1.63322 -1.50134 -2.11412  
 H 1.54922 -2.57988 -2.05069  
 C 2.90181 -0.89037 -2.23631  
 H 3.79551 -1.50460 -2.25413  
 C 3.02745 0.53975 -2.23130  
 H 4.01034 0.99590 -2.25733  
 H -0.47599 -1.14052 -1.69756  
 H -0.26804 1.35647 -1.70278  
 H 1.96082 2.41147 -1.95166

**B**

SCF (B3LYP) Energy = -1263.55502336  
 Enthalpy 0K = -1263.177229  
 Enthalpy 298K = -1263.149902  
 Free Energy 298K = -1263.235846  
 Lowest Frequency = 27.7019 cm<sup>-1</sup>  
 Second Frequency = 32.4273 cm<sup>-1</sup>

C -0.68596 -2.09601 1.98820  
 Ru -0.67309 -0.36172 -0.44768  
 C -1.10070 0.00948 -2.62023

## B3LYP Optimised Geometries and Energies

C -2.00545 -0.95988 -2.10899  
 C -0.13453 -2.32997 -1.31043  
 C 0.79290 -1.38720 -1.82298  
 H -1.47917 0.93459 -3.03452  
 H -3.06459 -0.73482 -2.12870  
 H 0.20751 -3.16603 -0.71407  
 H 1.85557 -1.51540 -1.66301  
 C -0.55309 -2.16170 3.50770  
 H -0.66884 -3.19106 3.85059  
 H 0.40649 -1.75697 3.84166  
 H -1.33988 -1.54566 3.95592  
 O -0.24045 -0.96825 1.49527  
 O -1.17869 -3.03046 1.35478  
 C 1.64053 1.68312 0.44983  
 C -0.50068 2.57491 0.26805  
 N 0.31855 1.50217 0.18587  
 O -2.33319 0.30264 0.63787  
 C -3.35007 0.94635 0.13875  
 O -3.40319 1.46292 -0.98466  
 C -4.52581 1.03659 1.10694  
 H -4.19304 1.42914 2.07207  
 H -5.30813 1.67353 0.69178  
 H -4.92636 0.03426 1.28970  
 C 2.64599 0.59676 0.24535  
 C 3.63696 0.79280 -0.73081  
 C 2.69030 -0.55751 1.03976  
 C 4.63381 -0.16309 -0.93536  
 H 3.62048 1.69499 -1.33681  
 C 3.69668 -1.50385 0.84155  
 H 1.91581 -0.71671 1.77935  
 C 4.66572 -1.31521 -0.14735  
 H 5.38580 -0.00305 -1.70266  
 H 3.72242 -2.39349 1.46438  
 H 5.44428 -2.05750 -0.29815  
 C -0.07085 3.83900 0.65502  
 C 2.12663 2.93499 0.85504  
 C 1.27006 4.02299 0.97449  
 H 3.18390 3.03005 1.07506  
 H 1.64545 4.99038 1.29452  
 H -0.78720 4.65213 0.69618  
 H -1.52669 2.40918 -0.02768  
 C -1.53756 -2.13727 -1.46433  
 H -2.22165 -2.82131 -0.98161  
 C 0.29276 -0.20160 -2.43539  
 H 0.99204 0.57717 -2.72247

**TS (B-C)**

SCF (B3LYP) Energy = -1263.50020833  
 Enthalpy 0K = -1263.126081  
 Enthalpy 298K = -1263.099347  
 Free Energy 298K = -1263.183714  
 Lowest Frequency = -120.4490 cm<sup>-1</sup>  
 Second Frequency = 25.1675 cm<sup>-1</sup>

C -3.16774 0.45715 -1.47807  
 Ru -0.08618 -0.40274 0.72953  
 C 0.24991 -1.66617 2.50419  
 C -1.01534 -2.00145 1.95775  
 C -1.69730 0.34580 2.07491  
 C -0.44761 0.69397 2.67885  
 H 1.01493 -2.42857 2.58614  
 H -1.16957 -3.00903 1.59391  
 H -2.40243 1.10417 1.75863  
 H -0.21391 1.73185 2.88397  
 C -4.28443 -0.08654 -2.38081  
 H -4.27648 -1.18262 -2.33677  
 H -5.26234 0.25839 -2.03601  
 H -4.12211 0.20402 -3.42165  
 O -2.02410 0.57116 -2.02033  
 O -3.45938 0.72179 -0.27837

## XYZ Coordinates and Computed Energies

```

C 2.20478 0.95907 -0.65525
C 3.94913 -1.18077 -0.79209
C 2.70633 -1.27924 -0.17808
H 2.33296 -2.21333 0.22653
N 1.86525 -0.22957 -0.09496
O -0.30595 -1.53299 -0.98093
C -0.02156 -2.80419 -1.04681
O 0.46891 -3.48790 -0.13814
C -0.32123 -3.39848 -2.41647
H 0.52652 -3.20095 -3.08208
H -0.45098 -4.47890 -2.33229
H -1.20309 -2.93056 -2.85761
H 4.59630 -2.04974 -0.83138
C 1.21585 2.03660 -0.50980
C 1.63918 3.36761 -0.36229
C -0.15943 1.70949 -0.40120
C 0.71729 4.37768 -0.10107
H 2.69750 3.60710 -0.41248
C -1.07184 2.75171 -0.14088
H -0.75563 0.86051 -0.97071
C -0.64178 4.06604 0.01773
H 1.05819 5.40242 0.01575
H -2.12689 2.48617 -0.11679
H -1.36447 4.85379 0.21191
C 3.43850 1.10832 -1.30321
C 4.32052 0.03649 -1.36483
H 5.27659 0.14269 -1.86836
H 3.67945 2.05541 -1.77163
C -1.99828 -0.99252 1.73840
H -2.91188 -1.18671 1.19060
C 0.52871 -0.30663 2.86678
H 1.51504 -0.03838 3.23149

```

**C**  
SCF (B3LYP) Energy = -1263.57310428  
Enthalpy 0K = -1263.195767  
Enthalpy 298K = -1263.168358  
Free Energy 298K = -1263.254567  
Lowest Frequency = 27.1882 cm<sup>-1</sup>  
Second Frequency = 30.8684 cm<sup>-1</sup>

```

C 3.88176 0.26177 0.80833
Ru -0.24187 -0.65544 -0.64867
C -1.05724 -2.64484 -1.62593
C 0.14734 -2.97205 -1.00617
C 1.28862 -1.12954 -2.21231
C 0.04458 -0.78132 -2.83061
H -1.96047 -3.19692 -1.38804
H 0.18197 -3.75337 -0.25759
H 2.18683 -0.55351 -2.39161
H -0.01179 0.06747 -3.50254
C 5.20628 0.89182 1.18286
H 5.96938 0.61146 0.45729
H 5.10104 1.98085 1.21082
H 5.50408 0.57111 2.18543
O 2.93385 0.53400 1.70105
O 3.71706 -0.40905 -0.20024
C -4.16802 -0.28847 1.25169
C -2.98640 -0.77067 0.70475
H -2.75511 -1.82733 0.68244
N -2.03526 0.04344 0.20934
O 0.55284 -0.55374 1.32187
C 0.14224 -1.42192 2.22240
O -0.66366 -2.32691 2.01042
C 0.73197 -1.19222 3.60848
H 0.22858 -0.33644 4.07174
H 0.57166 -2.07428 4.22969
H 1.79637 -0.95121 3.55470
H -4.90706 -0.98372 1.63355
C -1.04923 2.15419 -0.22105

```

## B3LYP Optimised Geometries and Energies

```

C -0.99396 3.55854 -0.23187
C 0.04546 1.36840 -0.66708
C 0.15288 4.20790 -0.67350
H -1.84173 4.14775 0.10803
C 1.20095 2.05349 -1.07775
H 2.04915 0.12302 1.45336
C 1.25351 3.44938 -1.08693
H 0.19643 5.29290 -0.68472
H 2.08388 1.49432 -1.37191
H 2.16156 3.95010 -1.41487
C -2.19224 1.39631 0.28057
C -4.36070 1.09429 1.30693
C -3.36586 1.93612 0.82974
H -5.27094 1.50905 1.72989
H -3.48488 3.01175 0.88465
C 1.31060 -2.16281 -1.25500
H 2.22276 -2.32171 -0.69307
C -1.12807 -1.50354 -2.50048
H -2.08028 -1.20933 -2.92841

```

**B'**  
SCF (B3LYP) Energy = -1031.31280320  
Enthalpy 0K = -1031.037737  
Enthalpy 298K = -1031.016322  
Free Energy 298K = -1031.087994  
Lowest Frequency = 34.5891 cm<sup>-1</sup>  
Second Frequency = 53.7190 cm<sup>-1</sup>

```

C -2.73975 -0.29836 -1.07481
Ru -0.42677 -0.35225 -0.10071
C -4.11400 -0.41793 -1.67775
H -4.85524 0.04815 -1.02574
H -4.13680 0.03344 -2.67160
H -4.36533 -1.47952 -1.77800
O -1.70171 -0.26864 -1.82483
O -2.57423 -0.25815 0.18511
C 1.99644 0.83614 -0.32008
C 2.35173 -1.27799 -1.25727
N 1.52379 -0.37174 -0.71486
O -0.56221 -2.43383 0.25737
C -0.09813 -2.28454 1.44078
O 0.25625 -1.11300 1.79571
C -0.01770 -3.44828 2.38853
H 0.15210 -4.37605 1.83849
H 0.77297 -3.28572 3.12326
H -0.97109 -3.53685 2.92093
C 0.86632 1.64103 0.22353
C 0.91307 2.21788 1.52328
C -0.22520 1.94972 -0.64252
C -0.11820 3.01892 1.96428
H 1.75742 1.99531 2.16818
C -1.26341 2.78872 -0.15538
H -0.15547 1.76230 -1.70846
C -1.22326 3.29650 1.12617
H -0.08355 3.43948 2.96506
H -2.08212 3.04539 -0.82096
H -2.02733 3.93011 1.48775
C 3.71019 -1.00270 -1.41425
C 3.33967 1.16892 -0.43098
C 4.21218 0.22740 -0.98974
H 3.68837 2.14010 -0.09630
H 5.26820 0.45552 -1.09508
H 4.35983 -1.75082 -1.85570
H 1.90471 -2.22303 -1.54613

```

**TS (B' -C')**  
SCF (B3LYP) Energy = -1031.28251738  
Enthalpy 0K = -1031.007987  
Enthalpy 298K = -1030.987177  
Free Energy 298K = -1031.057744

## XYZ Coordinates and Computed Energies

Lowest Frequency = -59.8195 cm<sup>-1</sup>  
 Second Frequency = 39.7253 cm<sup>-1</sup>

|    |          |          |          |
|----|----------|----------|----------|
| C  | -2.89170 | 1.17750  | -0.56025 |
| Ru | -0.50030 | -0.26292 | 0.07579  |
| C  | -4.33791 | 1.61068  | -0.36454 |
| H  | -4.59152 | 2.40889  | -1.06412 |
| H  | -4.99640 | 0.75614  | -0.55565 |
| H  | -4.51090 | 1.93495  | 0.66488  |
| O  | -2.27317 | 1.45716  | -1.60010 |
| O  | -2.39406 | 0.49756  | 0.42814  |
| C  | 2.39629  | -0.03241 | -0.17576 |
| C  | 3.11034  | -2.64688 | -0.63803 |
| C  | 1.78216  | -2.26063 | -0.49656 |
| H  | 0.96663  | -2.96905 | -0.58103 |
| N  | 1.42379  | -0.98366 | -0.25608 |
| O  | -1.42512 | -1.98914 | -0.63613 |
| C  | -1.56305 | -2.42346 | 0.56002  |
| O  | -1.01047 | -1.71915 | 1.46969  |
| C  | -2.34675 | -3.66072 | 0.87166  |
| H  | -1.95083 | -4.14403 | 1.76703  |
| H  | -3.38669 | -3.37673 | 1.06535  |
| H  | -2.32921 | -4.34581 | 0.02185  |
| H  | 3.34712  | -3.68784 | -0.82961 |
| C  | 1.87308  | 1.32895  | 0.04912  |
| C  | 2.52729  | 2.25922  | 0.86934  |
| C  | 0.63261  | 1.68617  | -0.54730 |
| C  | 1.96944  | 3.51730  | 1.08909  |
| H  | 3.45642  | 1.98315  | 1.35906  |
| C  | 0.08518  | 2.96121  | -0.32296 |
| H  | 0.20535  | 1.10135  | -1.39207 |
| C  | 0.74673  | 3.86605  | 0.50262  |
| H  | 2.48275  | 4.22517  | 1.73326  |
| H  | -0.85356 | 3.20147  | -0.80872 |
| H  | 0.31718  | 4.84595  | 0.68729  |
| C  | 3.74716  | -0.35596 | -0.30585 |
| C  | 4.11280  | -1.68157 | -0.53313 |
| H  | 5.15809  | -1.95324 | -0.64028 |
| H  | 4.49293  | 0.42927  | -0.24690 |

**C'**

SCF (B3LYP) Energy = -1031.28177048  
 Enthalpy 0K = -1031.006881  
 Enthalpy 298K = -1030.984779  
 Free Energy 298K = -1031.061183  
 Lowest Frequency = 11.4717 cm<sup>-1</sup>  
 Second Frequency = 23.3156 cm<sup>-1</sup>

|    |          |          |          |
|----|----------|----------|----------|
| C  | 2.55168  | 1.95342  | 1.67357  |
| Ru | -0.15470 | -1.49744 | -0.49697 |
| C  | 2.45355  | 3.34518  | 2.25390  |
| H  | 3.36793  | 3.89760  | 2.04039  |
| H  | 1.59531  | 3.86531  | 1.81733  |
| H  | 2.28685  | 3.29215  | 3.33364  |
| O  | 1.48356  | 1.20633  | 1.98540  |
| O  | 3.48646  | 1.55625  | 1.00155  |
| C  | -3.38099 | -0.87113 | 2.35834  |
| C  | -2.30294 | -1.40055 | 1.66054  |
| H  | -1.84813 | -2.34320 | 1.94928  |
| N  | -1.75054 | -0.78867 | 0.59509  |
| O  | 1.47133  | -1.23022 | 0.72325  |
| C  | 2.32626  | -1.65008 | -0.17265 |
| O  | 1.83947  | -2.03563 | -1.26766 |
| C  | 3.78784  | -1.63281 | 0.13924  |
| H  | 3.98042  | -2.22781 | 1.03760  |
| H  | 4.35718  | -2.02947 | -0.70154 |
| H  | 4.07684  | -0.59869 | 0.35627  |
| H  | -3.78655 | -1.40446 | 3.21073  |
| C  | -1.53551 | 0.98209  | -0.96808 |
| C  | -1.88474 | 2.17889  | -1.61084 |

## B3LYP Optimised Geometries and Energies

|   |          |         |          |
|---|----------|---------|----------|
| C | -0.40491 | 0.22905 | -1.39940 |
| C | -1.11708 | 2.64971 | -2.67328 |
| H | -2.75458 | 2.74625 | -1.28925 |
| C | 0.35807  | 0.72907 | -2.46925 |
| H | 1.56661  | 0.32338 | 1.54903  |
| C | 0.00285  | 1.92428 | -3.09845 |
| H | -1.38834 | 3.57666 | -3.16959 |
| H | 1.22946  | 0.17565 | -2.80776 |
| H | 0.60132  | 2.29428 | -3.92730 |
| C | -2.25678 | 0.41474 | 0.17248  |
| C | -3.91397 | 0.34761 | 1.93257  |
| C | -3.34584 | 0.98930 | 0.83716  |
| H | -4.75753 | 0.79333 | 2.45066  |
| H | -3.73765 | 1.94071 | 0.49605  |

**C'** (without HOAc)

SCF (B3LYP) Energy = -802.176544706  
 Enthalpy 0K = -801.965271  
 Enthalpy 298K = -801.949242  
 Free Energy 298K = -802.009320  
 Lowest Frequency = 37.1505 cm<sup>-1</sup>  
 Second Frequency = 43.7642 cm<sup>-1</sup>

|    |          |          |          |
|----|----------|----------|----------|
| Ru | 0.75132  | -0.57729 | -0.64043 |
| C  | -3.01656 | -2.59174 | 0.19725  |
| C  | -1.69475 | -2.32017 | -0.13276 |
| H  | -0.99637 | -3.11480 | -0.37689 |
| N  | -1.19109 | -1.07107 | -0.16828 |
| O  | 1.83691  | -1.15688 | 0.99447  |
| C  | 2.94882  | -0.70382 | 0.51593  |
| O  | 2.91423  | -0.17444 | -0.63274 |
| C  | 4.20381  | -0.78551 | 1.33600  |
| H  | 4.20773  | -1.69821 | 1.93554  |
| H  | 5.07991  | -0.74611 | 0.68697  |
| H  | 4.23681  | 0.06878  | 2.02123  |
| H  | -3.36942 | -3.61690 | 0.21146  |
| C  | -1.31844 | 1.28237  | 0.09655  |
| C  | -1.93948 | 2.51857  | 0.32885  |
| C  | 0.07497  | 1.21137  | -0.19640 |
| C  | -1.19313 | 3.69354  | 0.28560  |
| H  | -3.00451 | 2.57156  | 0.54103  |
| C  | 0.80691  | 2.41214  | -0.22873 |
| C  | 0.17842  | 3.63657  | 0.00734  |
| H  | -1.67526 | 4.64971  | 0.46585  |
| H  | 1.87119  | 2.38051  | -0.44541 |
| H  | 0.75899  | 4.55540  | -0.02732 |
| C  | -2.00534 | -0.00958 | 0.14010  |
| C  | -3.85892 | -1.52057 | 0.50331  |
| C  | -3.34634 | -0.22773 | 0.47498  |
| H  | -4.89879 | -1.69141 | 0.76449  |
| H  | -3.97977 | 0.61784  | 0.71787  |

**D<sup>+</sup>** (K<sup>1</sup>)

SCF (B3LYP) Energy = -1281.98552893  
 Enthalpy 0K = -1281.589326  
 Enthalpy 298K = -1281.563235  
 Free Energy 298K = -1281.644939  
 Lowest Frequency = 30.8995 cm<sup>-1</sup>  
 Second Frequency = 36.8516 cm<sup>-1</sup>

|    |          |          |          |
|----|----------|----------|----------|
| Ru | 0.05481  | -0.49549 | -0.15393 |
| O  | -0.01933 | -2.56510 | -0.75652 |
| C  | -0.63826 | -2.84659 | 0.32147  |
| C  | -1.12983 | -4.22748 | 0.62588  |
| O  | -0.85003 | -1.87220 | 1.13526  |
| H  | -2.13961 | -4.34258 | 0.21663  |
| H  | -0.48406 | -4.97076 | 0.15512  |
| H  | -1.18165 | -4.38580 | 1.70456  |
| C  | -2.66167 | 0.77821  | 0.28513  |
| C  | -3.98860 | 0.67075  | 0.72564  |

## XYZ Coordinates and Computed Energies

```

C -2.24909 -0.03101 -0.79142
C -4.87475 -0.20204 0.09428
H -4.32699 1.23959 1.58520
C -3.13438 -0.90788 -1.42234
C -4.45449 -0.99221 -0.97915
H -5.89774 -0.27270 0.45026
H -2.79230 -1.50814 -2.25952
H -5.15198 -1.66596 -1.46640
H -1.29743 0.19559 -1.33497
C -1.68137 1.64876 0.96335
C -1.11336 3.55141 2.34653
H -1.40750 4.43339 2.90591
C -2.06524 2.78695 1.68384
H -3.11034 3.07134 1.70667
C 0.55041 2.03894 1.52701
H 1.57767 1.70813 1.44843
C 0.22402 3.16201 2.27355
H 1.00679 3.71720 2.77809
N -0.36477 1.29102 0.87519
C 2.13031 0.61290 -1.24110
C 2.27059 2.01032 -1.40451
C 1.37256 -0.12842 -2.19075
C 1.63811 2.66077 -2.45196
H 2.87911 2.57146 -0.70188
C 0.74260 0.56201 -3.25563
C 0.85512 1.93788 -3.37202
H 1.75323 3.73400 -2.56772
H 0.20285 -0.00922 -4.00495
H 0.37173 2.45625 -4.19402
H 1.46621 -1.20777 -2.24505
C 2.80578 -0.10802 -0.12625
C 4.59817 -0.82867 1.29414
H 5.64956 -0.83635 1.56257
C 4.15851 -0.08321 0.19625
H 4.84860 0.49201 -0.41137
C 2.33059 -1.53741 1.67156
H 1.56085 -2.06668 2.22151
C 3.67511 -1.56678 2.03552
H 3.98425 -2.15690 2.89090
N 1.91717 -0.81430 0.61749

```

TS (D<sup>+</sup>-E<sup>+</sup>) (K<sup>1</sup>)

```

SCF (B3LYP) Energy = -1281.94712078
Enthalpy 0K = -1281.556574
Enthalpy 298K = -1281.530819
Free Energy 298K = -1281.611939
Lowest Frequency = -1168.9487 cm-1
Second Frequency = 32.3953 cm-1

```

```

Ru 0.08925 -0.00606 -0.27818
O 0.88612 -1.73961 1.97905
C -0.04487 -0.98535 2.38139
C -0.54770 -1.11029 3.79323
O -0.60588 -0.10469 1.62932
H -1.05265 -2.07512 3.90242
H 0.30011 -1.10619 4.48250
H -1.24221 -0.30671 4.03648
C -2.96669 -0.37585 -0.39721
C -4.14549 -0.80077 0.22929
C -1.97710 -1.33677 -0.68946
C -4.33340 -2.14671 0.54588
H -4.90612 -0.07670 0.50291
C -2.16774 -2.68396 -0.37669
C -3.34879 -3.09098 0.24573
H -5.25140 -2.45777 1.03450
H -1.40735 -3.41349 -0.63436
H -3.50366 -4.13750 0.48742
H -1.13492 -1.09306 -1.38231
C -2.72024 1.04434 -0.71360
C -3.45177 3.25117 -1.37209

```

## B3LYP Optimised Geometries and Energies

```

H -4.24460 3.94501 -1.63211
C -3.75090 1.93482 -1.03887
H -4.77504 1.58098 -1.05707
C -1.13836 2.72841 -1.05398
H -0.08818 2.99870 -1.05357
C -2.11623 3.65591 -1.38771
H -1.83155 4.66697 -1.65614
N -1.42099 1.45456 -0.71078
C 2.90370 -0.52442 -0.66056
C 3.99423 -0.96067 -1.42231
C 1.72557 -1.32631 -0.53968
C 3.95163 -2.20540 -2.04905
H 4.86940 -0.32968 -1.54580
C 1.73003 -2.58818 -1.16733
C 2.82262 -3.02053 -1.91916
H 4.79941 -2.54123 -2.63766
H 0.87482 -3.24774 -1.04871
H 2.79967 -3.99397 -2.39960
H 1.13268 -1.41528 0.73309
C 2.87584 0.76365 0.04505
C 3.82283 2.68086 1.16375
H 4.68480 3.26893 1.46179
C 3.99224 1.52063 0.41531
H 4.98373 1.18108 0.13970
C 1.45904 2.28714 1.14165
H 0.43822 2.53141 1.41128
C 2.53527 3.06517 1.54701
H 2.36304 3.94787 2.15219
N 1.62106 1.17960 0.38969

```

E<sup>+</sup> (K<sup>1</sup>)

```

SCF (B3LYP) Energy = -1281.95609085
Enthalpy 0K = -1281.560645
Enthalpy 298K = -1281.534418
Free Energy 298K = -1281.616949
Lowest Frequency = 30.0574 cm-1
Second Frequency = 34.5416 cm-1

```

```

Ru 0.11874 0.01862 -0.32560
O 0.87634 -1.77785 2.10416
C -0.07906 -0.95153 2.42663
C -0.58677 -1.03980 3.83013
O -0.56067 -0.12362 1.61649
H -1.00493 -2.03694 3.99855
H 0.24597 -0.91494 4.52812
H -1.34787 -0.28163 4.00735
C -2.96542 -0.45239 -0.38741
C -4.11186 -0.94263 0.25247
C -1.93883 -1.36217 -0.71585
C -4.23513 -2.30078 0.54791
H -4.89964 -0.25781 0.54969
C -2.06730 -2.72271 -0.42705
C -3.21614 -3.19429 0.21031
H -5.12963 -2.66105 1.04637
H -1.28348 -3.41437 -0.71667
H -3.32022 -4.25157 0.43191
H -1.12163 -1.06796 -1.41853
C -2.79837 0.98540 -0.68484
C -3.66028 3.15338 -1.30912
H -4.49220 3.80381 -1.55937
C -3.88211 1.81633 -0.99698
H -4.88391 1.40353 -1.02288
C -1.32104 2.75813 -0.99810
H -0.28795 3.08983 -0.99598
C -2.35079 3.63512 -1.31629
H -2.12583 4.66563 -1.56734
N -1.52628 1.46592 -0.67578
C 2.94979 -0.48085 -0.66936
C 4.10254 -0.99330 -1.27877
C 1.72032 -1.21574 -0.65672

```

## XYZ Coordinates and Computed Energies

```

C 4.07589 -2.25861 -1.86221
H 5.01899 -0.41129 -1.31366
C 1.74447 -2.49741 -1.24587
C 2.89847 -3.01218 -1.84142
H 4.96985 -2.65669 -2.33157
H 0.84594 -3.10951 -1.24421
H 2.88090 -4.00030 -2.29220
H 1.12296 -1.60109 1.13856
C 2.90390 0.82158 0.00391
C 3.81258 2.78725 1.07623
H 4.66350 3.39920 1.35770
C 4.00350 1.61217 0.35772
H 5.00225 1.29094 0.08690
C 1.45841 2.35093 1.05611
H 0.43229 2.58956 1.31133
C 2.51758 3.15902 1.44670
H 2.32670 4.05526 2.02577
N 1.63941 1.22413 0.33759

```

**D<sup>+</sup>** (K<sup>2</sup>)

```

SCF (B3LYP) Energy = -1281.97908724
Enthalpy 0K = -1281.583204
Enthalpy 298K = -1281.557188
Free Energy 298K = -1281.638843
Lowest Frequency = 28.7604 cm-1
Second Frequency = 36.9089 cm-1

```

```

Ru -0.00293 0.89418 -0.00159
O 0.16806 2.75061 1.07048
C -0.01234 3.42055 -0.00607
C -0.05395 4.91824 -0.00183
O -0.18131 2.74592 -1.08134
H 0.24961 5.30924 -0.97416
H -1.08021 5.24755 0.19571
H 0.58437 5.31173 0.79109
C -2.36047 -0.75836 0.93644
C -3.47967 -1.55512 0.66278
C -2.30721 0.53981 0.38442
C -4.52123 -1.05744 -0.12261
H -3.53267 -2.57222 1.03750
C -3.35300 1.03992 -0.40072
C -4.46415 0.23578 -0.65503
H -5.38303 -1.68586 -0.32474
H -3.29398 2.04852 -0.79663
H -5.28410 0.61329 -1.25744
H -1.62634 1.29615 0.85935
C -1.21390 -1.22031 1.73909
C -0.22697 -2.54285 3.50252
H -0.31264 -3.29019 4.28452
C -1.33367 -2.19323 2.73711
H -2.29998 -2.64571 2.92671
C 1.04578 -0.93985 2.25366
H 1.96576 -0.41214 2.04069
C 0.98402 -1.89579 3.25993
H 1.87187 -2.11644 3.84166
N -0.01723 -0.60679 1.49270
C 2.36943 -0.73979 -0.93421
C 3.49431 -1.52665 -0.65525
C 2.30605 0.56096 -0.38948
C 4.53135 -1.01674 0.12831
H 3.55529 -2.54535 -1.02437
C 3.34709 1.07323 0.39412
C 4.46406 0.27890 0.65368
H 5.39769 -1.63752 0.33461
H 3.27988 2.08357 0.78418
H 5.28068 0.66583 1.25465
H 1.61896 1.30884 -0.86728
C 1.22719 -1.21486 -1.73551
C 0.25334 -2.55233 -3.49493
H 0.34625 -3.30148 -4.27436

```

## B3LYP Optimised Geometries and Energies

```

C 1.35638 -2.19004 -2.73012
H 2.32694 -2.63423 -2.91763
C -1.03459 -0.95676 -2.25215
H -1.95949 -0.43679 -2.04149
C -0.96358 -1.91545 -3.25519
H -1.84906 -2.14607 -3.83669
N 0.02485 -0.61150 -1.49167

```

**TS (D<sup>+</sup>-E<sup>+</sup>)** (K<sup>2</sup>)

```

SCF (B3LYP) Energy = -1281.94568989
Enthalpy 0K = -1281.555135
Enthalpy 298K = -1281.529197
Free Energy 298K = -1281.611175
Lowest Frequency = -1248.3163 cm-1
Second Frequency = 14.8030 cm-1

```

```

Ru 0.07459 0.65888 -0.06207
O 1.08899 2.30174 -1.35125
C 0.73728 3.18287 -0.42837
C 0.94857 4.63194 -0.72159
O 0.23271 2.74879 0.63160
H 0.61940 5.24328 0.11811
H 2.00824 4.81011 -0.92889
H 0.39556 4.90516 -1.62582
C 2.50010 -0.95110 -0.50231
C 3.77161 -1.48979 -0.27315
C 2.11907 0.27308 0.11814
C 4.67653 -0.82595 0.55634
H 4.06162 -2.43534 -0.72067
C 3.04765 0.91756 0.95843
C 4.31754 0.37580 1.17236
H 5.66060 -1.25110 0.72632
H 2.77477 1.85123 1.44307
H 5.02393 0.88795 1.81876
H 1.63949 1.33503 -0.75285
C 1.47491 -1.60134 -1.32752
C 0.66279 -3.20058 -2.94789
H 0.83562 -4.03949 -3.61408
C 1.70185 -2.68722 -2.18064
H 2.69569 -3.11250 -2.25335
C -0.77111 -1.53524 -1.99364
H -1.73032 -1.04273 -1.89407
C -0.59784 -2.60887 -2.85731
H -1.43606 -2.96436 -3.44575
N 0.22912 -1.04025 -1.23641
C -2.71771 -0.14789 0.60423
C -3.68354 -0.93889 -0.03940
C -2.55569 1.19680 0.20837
C -4.44550 -0.40894 -1.07961
H -3.81680 -1.97432 0.25926
C -3.31490 1.71397 -0.85168
C -4.25139 0.91220 -1.50131
H -5.18956 -1.02951 -1.56975
H -3.19505 2.75438 -1.13778
H -4.84587 1.31613 -2.31447
H -1.94967 1.87253 0.80605
C -1.86313 -0.71119 1.67539
C -1.51063 -1.95210 3.71253
H -1.89332 -2.53653 4.54279
C -2.37245 -1.46959 2.73111
H -3.44006 -1.65211 2.78265
C 0.30030 -0.90315 2.53653
H 1.34640 -0.65482 2.41683
C -0.15177 -1.65559 3.61348
H 0.55873 -1.99916 4.35688
N -0.53115 -0.44251 1.57646

```

**E<sup>+</sup>** (K<sup>2</sup>)

```

SCF (B3LYP) Energy = -1281.96870492
Enthalpy 0K = -1281.572473

```

## XYZ Coordinates and Computed Energies

Enthalpy 298K = -1281.545738  
 Free Energy 298K = -1281.630548  
 Lowest Frequency = 23.4937 cm<sup>-1</sup>  
 Second Frequency = 28.7144 cm<sup>-1</sup>

Ru -0.21535 -0.29147 -0.45898  
 O -2.27040 -2.52684 -2.03453  
 C -1.18528 -3.06834 -1.50131  
 C -0.98493 -4.50851 -1.85433  
 O -0.40159 -2.43726 -0.77611  
 H -0.05112 -4.87351 -1.42986  
 H -1.82562 -5.09785 -1.47520  
 H -0.97819 -4.62211 -2.94259  
 C -2.41548 1.51832 0.05933  
 C -3.71765 1.96381 0.32329  
 C -2.09668 0.12925 0.08155  
 C -4.72515 1.05209 0.63657  
 H -3.95632 3.02290 0.29664  
 C -3.12852 -0.76192 0.43726  
 C -4.42701 -0.30939 0.70438  
 H -5.73124 1.40394 0.83982  
 H -2.92399 -1.82631 0.53435  
 H -5.20221 -1.02300 0.96927  
 H -2.42074 -1.63539 -1.65620  
 C -1.28854 2.41932 -0.21142  
 C -0.21433 4.55982 -0.54078  
 H -0.26780 5.64235 -0.59718  
 C -1.35967 3.81442 -0.28300  
 H -2.31168 4.31144 -0.14086  
 C 1.01472 2.50899 -0.65214  
 H 1.92973 1.95014 -0.79946  
 C 0.99781 3.89555 -0.73069  
 H 1.91552 4.43329 -0.93945  
 N -0.09037 1.77922 -0.39464  
 C 2.78144 -0.34808 0.32014  
 C 3.88748 0.50976 0.44288  
 C 2.47481 -0.88157 -0.94664  
 C 4.65467 0.83828 -0.67454  
 H 4.12905 0.94341 1.40840  
 C 3.24166 -0.54027 -2.06559  
 C 4.33030 0.32203 -1.93325  
 H 5.50469 1.50455 -0.56382  
 H 3.00033 -0.97032 -3.03290  
 H 4.93085 0.58060 -2.79951  
 H 1.70436 -1.64384 -1.04321  
 C 1.95439 -0.67191 1.50649  
 C 1.74429 -1.25432 3.84588  
 H 2.19476 -1.47573 4.80780  
 C 2.53939 -0.94888 2.74681  
 H 3.62048 -0.94568 2.82557  
 C -0.17321 -0.99815 2.42916  
 H -1.24038 -0.99299 2.25764  
 C 0.36055 -1.28174 3.67836  
 H -0.30776 -1.51663 4.49913  
 N 0.59727 -0.69113 1.35915

**D**

SCF (B3LYP) Energy = -1510.68131982  
 Enthalpy 0K = -1510.235172  
 Enthalpy 298K = -1510.203567  
 Free Energy 298K = -1510.298882  
 Lowest Frequency = 23.5008 cm<sup>-1</sup>  
 Second Frequency = 28.7376 cm<sup>-1</sup>

Ru 0.96019 0.05676 -0.40635  
 O 2.12876 1.25235 -1.81208  
 C 1.71295 0.51599 -2.76018  
 C 2.25922 0.65047 -4.15535  
 O 0.83347 -0.37481 -2.49157  
 H 1.50348 0.36910 -4.89158

## B3LYP Optimised Geometries and Energies

H 2.60740 1.66983 -4.33181  
 H 3.11154 -0.02894 -4.26413  
 C -2.57606 0.06174 -0.93250  
 C -3.63364 -0.31822 -0.09139  
 C -2.22167 -0.77428 -2.00232  
 C -4.31622 -1.51616 -0.30510  
 H -3.91443 0.32477 0.73829  
 C -2.91798 -1.96293 -2.22202  
 C -3.96443 -2.33853 -1.37682  
 H -5.12548 -1.80177 0.36089  
 H -2.64090 -2.59638 -3.06006  
 H -4.50358 -3.26512 -1.55282  
 H -1.39891 -0.49524 -2.65033  
 C -1.95137 1.40435 -0.76996  
 C -2.29122 3.80781 -0.72732  
 H -2.95166 4.66949 -0.74812  
 C -2.80562 2.51911 -0.78773  
 H -3.87236 2.34998 -0.88115  
 C -0.11602 2.81972 -0.63177  
 H 0.96189 2.89426 -0.58245  
 C -0.90834 3.95907 -0.66583  
 H -0.43942 4.93670 -0.63903  
 N -0.60482 1.55717 -0.65774  
 C -0.08296 0.17668 2.43836  
 C -0.73397 0.78373 3.52042  
 C 0.94746 0.87349 1.76418  
 C -0.34983 2.05314 3.95169  
 H -1.55759 0.27596 4.01438  
 C 1.34339 2.13482 2.22680  
 C 0.69315 2.72756 3.30900  
 H -0.86138 2.51457 4.79136  
 H 2.18088 2.63271 1.74754  
 H 1.00442 3.70729 3.66028  
 H 1.79369 0.30119 1.21968  
 C -0.43869 -1.15262 1.92592  
 C -1.27672 -3.40729 2.12609  
 H -1.74070 -4.19564 2.71071  
 C -1.04740 -2.15645 2.68748  
 H -1.30412 -1.95764 3.72193  
 C -0.28230 -2.60259 0.09705  
 H 0.05295 -2.72184 -0.92606  
 C -0.87814 -3.63583 0.80742  
 H -1.02053 -4.59968 0.33125  
 N -0.08114 -1.38034 0.62937  
 O 2.51240 -1.31605 -0.48962  
 C 3.49294 -1.28150 0.36397  
 C 4.62069 -2.25608 0.04547  
 O 3.56287 -0.53297 1.34789  
 H 4.22155 -3.22055 -0.27868  
 H 5.21883 -1.85332 -0.77927  
 H 5.26461 -2.38448 0.91679

**TS (D-E)**

SCF (B3LYP) Energy = -1510.64344920  
 Enthalpy 0K = -1510.202365  
 Enthalpy 298K = -1510.170809  
 Free Energy 298K = -1510.265568  
 Lowest Frequency = -1259.3908 cm<sup>-1</sup>  
 Second Frequency = 27.4181 cm<sup>-1</sup>

Ru -0.64116 -0.47938 -0.57291  
 O -1.21550 -2.35011 -1.48667  
 C -0.46594 -2.14925 -2.49955  
 C -0.50551 -3.09964 -3.67002  
 O 0.28434 -1.12139 -2.51772  
 H 0.44716 -3.09158 -4.20296  
 H -0.74885 -4.10954 -3.33378  
 H -1.28944 -2.77460 -4.36291  
 C 2.83670 -0.17680 0.15191  
 C 3.55722 0.75554 0.91516

## XYZ Coordinates and Computed Energies

```

C 2.94982 -0.14651 -1.24680
C 4.36291 1.71016 0.29475
H 3.47362 0.73941 1.99828
C 3.76914 0.80082 -1.86203
C 4.47618 1.73110 -1.09679
H 4.90466 2.43258 0.89851
H 3.85520 0.80803 -2.94499
H 5.11347 2.46572 -1.58103
H 2.38756 -0.85272 -1.84689
C 2.09621 -1.27316 0.83381
C 2.22897 -3.15493 2.36595
H 2.78599 -3.75486 3.07910
C 2.81063 -2.04866 1.76188
H 3.84091 -1.78151 1.96741
C 0.25903 -2.67514 1.09684
H -0.75422 -2.89631 0.79377
C 0.92514 -3.48560 2.00368
H 0.41830 -4.35235 2.41364
N 0.79898 -1.56364 0.53464
C -1.34629 0.88422 1.97151
C -1.74561 1.01722 3.30656
C -1.80752 -0.20547 1.18205
C -2.63371 0.09713 3.86549
H -1.36435 1.82796 3.92150
C -2.71884 -1.10272 1.76628
C -3.12959 -0.95730 3.09356
H -2.94324 0.20753 4.90089
H -3.11482 -1.91793 1.16437
H -3.83399 -1.66258 3.52692
H -2.27047 0.11471 -0.13244
C -0.45493 1.82686 1.28290
C 0.65240 3.94968 0.96888
H 0.91569 4.94022 1.32730
C -0.10891 3.09619 1.75833
H -0.46781 3.42013 2.72850
C 0.68963 2.24363 -0.71042
H 0.98107 1.85638 -1.67910
C 1.04872 3.51993 -0.29772
H 1.62630 4.15484 -0.96000
N -0.02102 1.40152 0.06017
O -2.54303 0.29465 -1.41648
C -2.82922 1.56989 -1.71044
C -3.52148 1.69749 -3.05592
O -2.58936 2.52205 -0.98989
H -2.85155 1.34472 -3.84660
H -4.41195 1.06273 -3.07966
H -3.79621 2.73692 -3.23872

```

**E**

```

SCF (B3LYP) Energy = -1510.67425458
Enthalpy 0K = -1510.227323
Enthalpy 298K = -1510.195321
Free Energy 298K = -1510.292089
Lowest Frequency = 22.7985 cm-1
Second Frequency = 24.8135 cm-1

```

```

Ru 0.60273 0.47507 0.12259
O 1.41065 2.00809 1.38319
C 0.66871 2.98163 1.00749
C 0.84782 4.33323 1.66546
O -0.21122 2.81177 0.11574
H 0.01196 4.51230 2.35061
H 1.78178 4.37470 2.22790
H 0.82598 5.12343 0.91059
C -2.82892 -0.07725 0.52877
C -3.69112 -1.07752 0.05333
C -2.88939 1.20402 -0.04260
C -4.58423 -0.81189 -0.98515
H -3.64888 -2.07157 0.48966
C -3.79469 1.46877 -1.07186

```

## B3LYP Optimised Geometries and Energies

```

C -4.64157 0.46448 -1.54836
H -5.23615 -1.60048 -1.35001
H -3.83941 2.46712 -1.49811
H -5.34506 0.67660 -2.34866
H -2.22407 1.98469 0.30954
C -1.97590 -0.34107 1.71947
C -1.90874 -1.00455 4.05594
H -2.40439 -1.37874 4.94639
C -2.61202 -0.82901 2.87116
H -3.67572 -1.03243 2.82143
C 0.02273 -0.19315 2.89839
H 1.06672 0.07965 2.87098
C -0.56064 -0.65521 4.06865
H 0.04484 -0.73967 4.96458
N -0.64011 -0.06265 1.71992
C 1.62013 -2.24776 -0.25153
C 2.43596 -3.37622 -0.07342
C 1.83197 -1.05117 0.49187
C 3.49477 -3.33816 0.83044
H 2.25670 -4.28627 -0.64123
C 2.93016 -1.03976 1.37685
C 3.74659 -2.16159 1.54576
H 4.12624 -4.21101 0.96800
H 3.14900 -0.13442 1.94114
H 4.58454 -2.12088 2.23846
H 3.00615 0.86414 -1.06638
C 0.54219 -2.16139 -1.23642
C -0.79056 -2.92719 -3.10708
H -1.05782 -3.69905 -3.82282
C 0.19262 -3.16219 -2.15427
H 0.70996 -4.11447 -2.12575
C -1.04897 -0.73330 -2.18371
H -1.53049 0.23622 -2.14460
C -1.41783 -1.67999 -3.13151
H -2.18775 -1.44119 -3.85672
N -0.10599 -0.95171 -1.24623
O 2.12063 1.11158 -1.38731
C 2.26844 2.09679 -2.34813
C 0.95322 2.56815 -2.89077
O 3.37149 2.46820 -2.65961
H 0.35420 2.98065 -2.07235
H 1.13621 3.31658 -3.66108
H 0.40115 1.72199 -3.30999

```

**E** (without HOAc)

```

SCF (B3LYP) Energy = -1281.58282267
Enthalpy 0K = -1281.199599
Enthalpy 298K = -1281.173620
Free Energy 298K = -1281.255785
Lowest Frequency = 28.0921 cm-1
Second Frequency = 35.4198 cm-1

```

```

Ru -0.24054 -0.65374 -0.21135
O -0.58416 -2.79417 0.08730
C -0.95212 -2.90231 -1.13151
C -1.45996 -4.21512 -1.66836
O -0.90749 -1.86799 -1.87442
H -1.29814 -4.27426 -2.74632
H -0.97298 -5.04953 -1.15934
H -2.53717 -4.28299 -1.47992
C 2.78731 -0.10372 0.54018
C 3.92452 0.68759 0.30889
C 2.45942 -1.09746 -0.40003
C 4.70637 0.49392 -0.82960
H 4.17690 1.48237 1.00429
C 3.24054 -1.28669 -1.54202
C 4.36626 -0.49093 -1.76113
H 5.57671 1.12220 -0.99569
H 2.96583 -2.05880 -2.25406
H 4.97416 -0.63604 -2.64915

```



## XYZ Coordinates and Computed Energies

```

H 1.64215 -1.79776 -0.19475
C 1.93921 0.11708 1.73489
C 1.71098 0.65444 4.08503
H 2.15071 0.91329 5.04296
C 2.51204 0.45713 2.96630
H 3.59090 0.53921 3.03674
C -0.18233 0.14872 2.70086
H -1.24551 0.01304 2.55019
C 0.33278 0.49424 3.94201
H -0.34528 0.62941 4.77792
N 0.58639 -0.04007 1.59992
C -2.46199 1.20554 -0.21624
C -3.75128 1.70980 0.02328
C -2.09862 -0.10922 0.19249
C -4.70266 0.92372 0.66539
H -4.01797 2.71666 -0.28916
C -3.08532 -0.88380 0.83530
C -4.36451 -0.37519 1.06826
H -5.69897 1.31453 0.85018
H -2.84183 -1.89500 1.15176
H -5.10790 -0.99456 1.56582
C -1.40376 1.94993 -0.89446
C -0.45166 3.82589 -2.09395
H -0.54667 4.82091 -2.51832
C -1.52470 3.23628 -1.43824
H -2.46800 3.76312 -1.35031
C 0.81581 1.84462 -1.64237
H 1.72098 1.25306 -1.70687
C 0.74424 3.11243 -2.20431
H 1.60860 3.52325 -2.71462
N -0.21681 1.26558 -0.99547

```

**D<sup>+</sup>** ( $\eta^6$ )

```

SCF (B3LYP) Energy = -1281.97936970
Enthalpy 0K = -1281.582734
Enthalpy 298K = -1281.556522
Free Energy 298K = -1281.641109
Lowest Frequency = 9.0290 cm-1
Second Frequency = 20.6904 cm-1

```

```

Ru -0.40824 1.11941 -0.42013
O -0.53602 2.67632 1.03244
C -1.80447 2.54171 1.13078
C -2.62258 3.39431 2.04780
O -2.33044 1.65246 0.37906
H -2.03822 3.67905 2.92449
H -2.90855 4.31020 1.51858
H -3.53354 2.87107 2.34265
C -1.60509 -2.02359 0.40296
C -1.25823 -3.26216 -0.16480
C -2.82301 -1.42468 0.04423
C -2.09549 -3.87353 -1.09898
H -0.32782 -3.74405 0.12391
C -3.66413 -2.04813 -0.87947
C -3.30120 -3.26679 -1.45859
H -1.81188 -4.82640 -1.53522
H -4.61251 -1.58524 -1.13560
H -3.96056 -3.74844 -2.17409
H -3.11602 -0.48292 0.49270
C -0.70919 -1.43313 1.43577
C 0.45330 -1.70948 3.54866
H 0.69217 -2.30846 4.42179
C -0.38955 -2.20634 2.56155
H -0.83255 -3.19130 2.65238
C 0.62737 0.29965 2.26384
H 1.01025 1.29927 2.10692
C 0.97321 -0.42631 3.39451
H 1.63529 0.01589 4.13029
N -0.19205 -0.18005 1.29692
C 1.48766 0.45088 -1.46445

```

## B3LYP Optimised Geometries and Energies

```

C 0.38548 -0.37673 -1.87587
C 1.33131 1.85806 -1.56289
C -0.79502 0.18437 -2.40362
H 0.41818 -1.44525 -1.70345
C 0.15176 2.43772 -2.13004
C -0.91040 1.60715 -2.53533
H -1.63668 -0.45590 -2.63875
H 0.04313 3.51603 -2.15607
H -1.84595 2.04352 -2.86730
H 2.11423 2.48714 -1.15580
C 2.73743 -0.11832 -0.88800
C 4.36413 -1.87296 -0.65685
H 4.72377 -2.87081 -0.88780
C 3.16136 -1.41638 -1.19763
H 2.58977 -2.04846 -1.86874
C 4.59546 0.25795 0.41239
H 5.14275 0.95420 1.04363
C 5.09731 -1.02423 0.16795
H 6.03922 -1.33663 0.60584
N 3.44709 0.70705 -0.09838

```

TS (**D<sup>+</sup>-E<sup>+</sup>**) ( $\eta^6$ )

```

SCF (B3LYP) Energy = -1281.95443523
Enthalpy 0K = -1281.559105
Enthalpy 298K = -1281.533277
Free Energy 298K = -1281.616294
Lowest Frequency = -75.3638 cm-1
Second Frequency = 13.5234 cm-1

```

```

Ru 0.39575 -0.78111 -0.25359
O 0.45900 -1.78576 1.56205
C 1.60441 -2.39521 1.75068
C 1.69944 -3.18540 3.03819
O 2.54208 -2.30666 0.94736
H 2.55394 -3.86109 2.99570
H 1.83816 -2.49290 3.87529
H 0.77869 -3.74364 3.22227
C 1.91355 1.89849 0.11292
C 2.31709 3.00461 -0.64678
C 2.62031 0.68463 -0.00929
C 3.40176 2.89490 -1.51913
H 1.77412 3.94225 -0.57376
C 3.70851 0.58181 -0.88370
C 4.09852 1.68702 -1.64078
H 3.70563 3.75617 -2.10607
H 4.25683 -0.35361 -0.93651
H 4.95022 1.61772 -2.31020
H 2.44662 -0.15273 0.67505
C 0.75591 1.95116 1.02910
C -0.58818 2.98563 2.74345
H -0.80420 3.82479 3.39698
C 0.48213 3.04532 1.85520
H 1.12988 3.91375 1.81757
C -1.04730 0.77115 1.94669
H -1.61446 -0.15153 1.94326
C -1.35974 1.82489 2.79778
H -2.18978 1.72728 3.48815
N -0.02902 0.84309 1.06858
C -1.52384 -0.72360 -1.36117
C -0.56665 0.03562 -2.12201
C -1.18790 -2.06319 -0.98591
C 0.66957 -0.53472 -2.46706
H -0.75151 1.07873 -2.34718
C 0.04196 -2.66135 -1.40446
C 0.97827 -1.89279 -2.11275
H 1.42708 0.07668 -2.94373
H 0.30120 -3.65697 -1.06407
H 1.96555 -2.29182 -2.31326
H -1.87586 -2.59866 -0.34324
C -2.84000 -0.15793 -0.95117

```

## XYZ Coordinates and Computed Energies

```
C -4.68855 1.35179 -1.24092
H -5.17222 2.17057 -1.76416
C -3.42587 0.91102 -1.64027
H -2.93325 1.37250 -2.48888
C -4.65429 -0.34472 0.45055
H -5.11455 -0.87127 1.28333
C -5.31806 0.71617 -0.17443
H -6.30169 1.02264 0.16484
N -3.44792 -0.77630 0.07756
```

**E<sup>+</sup>** (n<sup>6</sup>)

```
SCF (B3LYP) Energy = -1281.97664136
Enthalpy 0K = -1281.580168
Enthalpy 298K = -1281.553993
Free Energy 298K = -1281.637126
Lowest Frequency = 17.1472 cm-1
Second Frequency = 29.1475 cm-1
```

```
Ru 0.28871 -0.77697 -0.06200
O 0.94031 -0.68196 2.00549
C 2.04571 -0.67564 2.57084
C 2.16935 -0.69220 4.06425
O 3.19537 -0.65777 1.93161
H 2.69134 0.21079 4.39511
H 1.18374 -0.74474 4.52365
H 2.77831 -1.54755 4.37127
C 2.24998 1.28338 -0.89557
C 3.39599 1.85341 -1.46900
C 2.09218 -0.12882 -0.81499
C 4.41430 1.03985 -1.96082
H 3.50193 2.93221 -1.53508
C 3.14527 -0.92185 -1.30566
C 4.29137 -0.34735 -1.87158
H 5.29936 1.48471 -2.40362
H 3.08243 -2.00574 -1.25403
H 5.08488 -0.98879 -2.24427
H 3.04061 -0.60723 0.95814
C 1.15835 2.06675 -0.31445
C 0.04417 4.06772 0.45416
H 0.01303 5.14718 0.56337
C 1.12386 3.46049 -0.17548
H 1.94589 4.05890 -0.54954
C -0.90995 1.89637 0.78701
H -1.68296 1.23330 1.16001
C -0.98927 3.27276 0.95493
H -1.84223 3.70366 1.46648
N 0.12464 1.31075 0.15365
C -2.02899 -1.23323 -0.55885
C -1.16848 -1.03784 -1.70467
C -1.62380 -2.14889 0.42110
C -0.04832 -1.87542 -1.93038
H -1.40321 -0.26823 -2.43044
C -0.41697 -2.90178 0.24700
C 0.32362 -2.84700 -0.95214
H 0.55394 -1.74007 -2.82113
H -0.08664 -3.55594 1.04724
H 1.19295 -3.47697 -1.09458
H -2.20627 -2.24020 1.32958
C -3.28941 -0.46136 -0.39161
C -5.22909 0.64889 -1.28107
H -5.82527 0.99091 -2.12123
C -4.02538 -0.02213 -1.49971
H -3.68757 -0.22442 -2.51032
C -4.85085 0.38667 1.07000
H -5.14797 0.53248 2.10606
C -5.65419 0.86021 0.02786
H -6.58449 1.37455 0.24379
N -3.69712 -0.25679 0.87544
```

**<sup>3</sup>D<sup>+</sup>** (\* single point)

## B3LYP Optimised Geometries and Energies

```
SCF (B3LYP) Energy = -1680.31867788
Enthalpy 0K = -1679.780517
Enthalpy 298K = -1679.743169
Free Energy 298K = -1679.845397
Lowest Frequency = 50.8627 cm-1
Second Frequency = 51.2231 cm-1
```

INT (**<sup>3</sup>D<sup>+</sup>**)

```
SCF (B3LYP) Energy = -1680.30531939
Enthalpy 0K = -1679.767003
Enthalpy 298K = -1679.725842
Free Energy 298K = -1679.845129
Lowest Frequency = 17.3653 cm-1
Second Frequency = 19.4605 cm-1
```

```
Ru 0.38035 0.82714 0.27366
C -2.33289 -0.89408 -1.53895
C -1.72442 -2.00480 -2.12693
C -1.69118 0.36232 -1.63271
C -0.50216 -1.88420 -2.80495
H -2.22757 -2.96487 -2.07546
C -0.46070 0.47874 -2.29314
C 0.13182 -0.65304 -2.89110
H -0.06759 -2.75706 -3.28348
H -0.04532 1.46653 -2.45722
H 1.06481 -0.55141 -3.43670
H -2.14474 1.26978 -1.24939
C -3.64248 -1.04170 -0.85147
C -5.82925 -0.22027 -0.24679
H -6.59403 0.55058 -0.27505
C -4.60418 -0.01774 -0.87923
H -4.40620 0.90417 -1.41524
C -5.05298 -2.39522 0.37546
H -5.19868 -3.35681 0.86369
C -6.06465 -1.43461 0.39855
H -7.00656 -1.64008 0.89604
N -3.87091 -2.21529 -0.22574
C 2.96535 -1.69241 0.11154
C 2.77645 -2.98304 -0.40532
C 3.15564 -1.53523 1.49129
C 2.74521 -4.08947 0.44454
H 2.64858 -3.11754 -1.47540
C 3.13136 -2.64183 2.33977
C 2.92116 -3.92124 1.82045
H 2.60222 -5.08340 0.03033
H 3.29444 -2.50876 3.40530
H 2.91464 -4.78347 2.48054
H 3.34166 -0.54601 1.89323
C 3.12610 -0.53935 -0.81868
C 4.49162 0.44974 -2.56793
H 5.32291 0.39143 -3.26363
C 4.19723 -0.61277 -1.72278
H 4.80851 -1.50791 -1.72258
C 2.64661 1.60440 -1.57415
H 2.01019 2.47319 -1.46315
C 3.70653 1.59463 -2.47095
H 3.89696 2.47276 -3.07816
N 2.32024 0.55909 -0.77488
O 0.55323 2.86166 -0.17317
C -0.44704 3.65558 -0.48125
C -0.03400 5.11909 -0.57540
O -1.61097 3.30545 -0.68160
H -0.86736 5.72094 -0.93843
H 0.27477 5.48132 0.41064
H 0.82512 5.23528 -1.24274
N -1.35540 1.19727 1.24999
C -2.32707 1.46634 1.81403
C -3.57198 1.85798 2.45981
H -3.48224 1.78698 3.54711
H -3.80862 2.89007 2.18412
```

## XYZ Coordinates and Computed Energies

```
H -4.38267 1.20589 2.12264
N 1.33604 1.29829 1.92571
C 1.86320 1.70272 2.87345
C 2.53622 2.21699 4.05992
H 3.61975 2.21200 3.90955
H 2.21464 3.24438 4.25391
H 2.29648 1.60015 4.93074
N 0.06993 -1.13550 0.73957
C -0.36282 -2.18281 0.97535
C -0.96568 -3.48498 1.21944
H -1.02784 -3.67938 2.29389
H -1.97290 -3.47701 0.78444
H -0.36225 -4.26818 0.75373
```

TS ( $^3D^+ - ^3E^+$ )

```
SCF (B3LYP) Energy = -1680.27776349
Enthalpy 0K = -1679.744648
Enthalpy 298K = -1679.704202
Free Energy 298K = -1679.820409
Lowest Frequency = -1158.6118 cm-1
Second Frequency = 18.2623 cm-1
```

```
Ru -0.10692 -0.93836 0.27381
C 1.61355 1.20736 -1.52295
C 1.49447 2.26916 -2.43477
C 0.72167 0.09870 -1.58178
C 0.57069 2.22332 -3.47721
H 2.16996 3.11464 -2.34537
C -0.17230 0.07690 -2.68082
C -0.24847 1.10060 -3.62221
H 0.51527 3.04133 -4.18977
H -0.82636 -0.78188 -2.80459
H -0.94257 1.03039 -4.45493
H 1.31820 -1.15877 -1.51253
C 2.80649 1.27463 -0.62167
C 5.00211 0.47443 -0.01691
H 5.81147 -0.24381 -0.11937
C 3.81618 0.30251 -0.72764
H 3.68065 -0.54766 -1.38686
C 4.08386 2.50045 0.85605
H 4.15796 3.39161 1.47720
C 5.14492 1.59737 0.79948
H 6.05583 1.78240 1.35959
N 2.94464 2.36063 0.16372
C -2.71790 1.67963 0.13877
C -1.90349 2.51524 -0.63704
C -3.33975 2.20405 1.28343
C -1.71581 3.84884 -0.27225
H -1.43469 2.13009 -1.53348
C -3.14217 3.53538 1.65268
C -2.33541 4.36439 0.86873
H -1.09394 4.48772 -0.89193
H -3.63477 3.92851 2.53727
H -2.20090 5.40789 1.13882
H -3.98831 1.56853 1.88032
C -3.09616 0.31178 -0.32248
C -4.93286 -1.07400 -1.11603
H -5.98224 -1.19955 -1.36400
C -4.45616 0.13668 -0.63444
H -5.12039 0.98428 -0.51227
C -2.69140 -1.88628 -0.94232
H -1.96568 -2.68179 -1.03865
C -4.01820 -2.10983 -1.28050
H -4.31386 -3.08208 -1.65944
N -2.20784 -0.71118 -0.46545
O -0.00233 -2.86798 -0.63872
C 0.96788 -3.14308 -1.41234
C 1.12532 -4.55599 -1.91186
O 1.80574 -2.26796 -1.80792
H 2.17609 -4.85147 -1.86785
```

## B3LYP Optimised Geometries and Energies

```
H 0.51012 -5.24505 -1.33328
H 0.82209 -4.59596 -2.96341
N 1.66923 -1.38374 1.10851
C 2.62796 -1.70223 1.67352
C 3.84893 -2.09224 2.36631
H 3.65142 -2.24169 3.43163
H 4.23762 -3.02427 1.94573
H 4.60206 -1.30826 2.24803
N -1.01644 -1.82540 1.89481
C -1.53210 -2.35563 2.78590
C -2.18655 -3.02848 3.90192
H -3.27295 -2.95233 3.80075
H -1.90778 -4.08599 3.91864
H -1.88789 -2.56853 4.84817
N 0.00288 0.81624 1.26080
C 0.26271 1.77426 1.85409
C 0.61357 3.00721 2.54363
H 1.16152 2.78489 3.46375
H 1.25154 3.59308 1.87565
H -0.28903 3.57228 2.78513
```

 $^3E^+$ 

```
SCF (B3LYP) Energy = -1680.29030330
Enthalpy 0K = -1679.752582
Enthalpy 298K = -1679.711334
Free Energy 298K = -1679.830992
Lowest Frequency = 18.0340 cm-1
Second Frequency = 19.2569 cm-1
```

```
Ru 0.16027 -0.83648 -0.34226
C -1.81024 0.87349 1.55273
C -2.15184 1.38130 2.82607
C -0.63656 0.07770 1.37841
C -1.38288 1.13117 3.95658
H -3.04400 1.99535 2.91732
C 0.08822 -0.18280 2.57339
C -0.25494 0.32268 3.82701
H -1.66867 1.54588 4.91840
H 0.97269 -0.81034 2.51865
H 0.35773 0.08598 4.69314
H -1.71408 -1.61764 1.61476
C -2.82589 1.21044 0.49615
C -5.14418 1.15529 -0.21347
H -6.17160 0.83112 -0.07122
C -4.14959 0.76217 0.67822
H -4.38709 0.12587 1.52471
C -3.46192 2.37701 -1.38633
H -3.15629 3.03519 -2.19865
C -4.79582 1.98595 -1.27929
H -5.53288 2.33455 -1.99553
N -2.49591 2.01321 -0.53140
C 2.65386 1.85868 0.22623
C 1.71898 2.49592 1.05321
C 3.32391 2.61578 -0.75077
C 1.44973 3.85606 0.89283
H 1.21456 1.93557 1.82927
C 3.05074 3.97454 -0.91084
C 2.11147 4.59939 -0.08607
H 0.72875 4.33605 1.54742
H 3.58327 4.54633 -1.66564
H 1.90850 5.66061 -0.19670
H 4.06448 2.13618 -1.38514
C 3.09498 0.45010 0.45070
C 4.99430 -0.96934 1.00720
H 6.04416 -1.08580 1.25741
C 4.45706 0.28593 0.76387
H 5.07450 1.17377 0.83327
C 2.80837 -1.84730 0.61043
H 2.12735 -2.68359 0.53898
C 4.13964 -2.06570 0.93122
```

## XYZ Coordinates and Computed Energies

```

H  4.48547 -3.07705  1.11542
N  2.26407 -0.62784  0.36717
O  0.02298 -2.79857  0.61954
C -0.88880 -3.28196  1.30917
C -0.91906 -4.73316  1.68647
O -1.89731 -2.57838  1.77827
H -0.71543 -4.82813  2.75822
H -1.91586 -5.14525  1.50969
H -0.17100 -5.28743  1.12139
N -1.64533 -1.22254 -1.12587
C -2.64146 -1.49937 -1.65005
C -3.90752 -1.82805 -2.29293
H -3.79790 -1.80526 -3.38109
H -4.23547 -2.82790 -1.99384
H -4.66775 -1.10023 -1.99642
N  1.04685 -1.86849 -2.03085
C  1.51283 -2.41406 -2.94076
C  2.10506 -3.09980 -4.08405
H  1.65333 -2.74199 -5.01354
H  3.18139 -2.90904 -4.11974
H  1.94052 -4.17808 -4.00399
N  0.22041  0.85029 -1.37913
C  0.13952  1.80741 -2.02166
C  0.01004  3.04550 -2.77433
H -0.47749  2.86104 -3.73600
H -0.59240  3.74751 -2.19099
H  0.99513  3.48494 -2.94807

```

**6F<sup>2+</sup>** (\* single point)

```

SCF (B3LYP) Energy = -891.156384704
Enthalpy 0K = -890.868490
Enthalpy 298K = -890.842903
Free Energy 298K = -890.920942
Lowest Frequency = 67.6506 cm-1
Second Frequency = 67.6534 cm-1

```

**3A<sup>2+</sup>**

```

SCF (B3LYP) Energy = -725.008746480
Enthalpy 0K = -724.763198
Enthalpy 298K = -724.742420
Free Energy 298K = -724.815952
Lowest Frequency = 21.9834 cm-1
Second Frequency = 23.3816 cm-1

```

```

C  2.20883  1.34073  0.46975
C  2.20901  1.06471 -0.94014
C  2.20856 -0.26480 -1.39606
C  2.20815 -1.34781 -0.45208
C  2.20796 -1.07786  0.92727
C  2.20819  0.28115  1.39319
Ru  0.44093 -0.00012  0.00002
H  2.16019 -0.47363 -2.45934
H  2.15937  0.48860  2.45673
H  2.16066  2.36601  0.82047
H  2.15903 -1.89423  1.63977
H  2.15935 -2.37258 -0.80420
H  2.16091  1.88209 -1.65156
N -0.83306 -0.52701  1.54354
C -1.53145 -0.82481  2.41600
C -2.40218 -1.20167  3.52006
H -3.44915 -1.09151  3.22201
H -2.21686 -2.24340  3.79958
H -2.20581 -0.55844  4.38341
N -0.83284 -1.07313 -1.22852
N -0.83210  1.60081 -0.31541
C -1.52976  2.50584 -0.49374
C -1.53107 -1.67972 -1.92289
C -2.40161 -2.44735 -2.80156
H -2.21456 -3.51715 -2.66662

```

## B3LYP Optimised Geometries and Energies

```

H -3.44864 -2.23422 -2.56618
H -2.20674 -2.17805 -3.84424
C -2.39955  3.65114 -0.71935
H -3.44662  3.33623 -0.67946
H -2.22336  4.40807  0.05116
H -2.19324  4.08548 -1.70243

```

**5F<sup>+</sup>** (κ<sup>1</sup>) (\* single point)

```

SCF (B3LYP) Energy = -987.151886450
Enthalpy 0K = -986.860491
Enthalpy 298K = -986.834007
Free Energy 298K = -986.914118
Lowest Frequency = 64.8194 cm-1
Second Frequency = 66.9460 cm-1

```

**4F<sup>+</sup>** (κ<sup>2</sup>)

```

SCF (B3LYP) Energy = -854.387330262
Enthalpy 0K = -854.145119
Enthalpy 298K = -854.119784
Free Energy 298K = -854.206442
Lowest Frequency = 15.0798 cm-1
Second Frequency = 15.7827 cm-1

```

```

N  2.02733  0.16357 -0.00021
C  3.17732  0.28623 -0.00001
N  0.01622 -1.33828  1.44686
C  0.02510 -2.08675  2.33033
N  0.01590 -1.33831 -1.44686
C  0.02451 -2.08698 -2.33016
N -2.02685  0.12010  0.00015
C -3.17975  0.21219  0.00008
C  4.62496  0.45184 -0.00036
H  4.93606  1.00558 -0.89082
H  4.93632  1.00680  0.88925
H  5.11650 -0.52506  0.00024
C  0.03555 -3.01109 -3.45748
H  0.93463 -3.63305 -3.42618
H -0.84382 -3.66037 -3.42133
H  0.02443 -2.45209 -4.39778
C -4.63140  0.33832  0.00025
H -5.09597 -0.65169 -0.00115
H -4.95787  0.88250  0.89110
H -4.95785  0.88501 -0.88908
C  0.03619 -3.01074  3.45774
H  0.92900 -3.64129  3.41955
H  0.03773 -2.45152  4.39797
H -0.84960 -3.65158  3.42861
O -0.01493  1.90200 -1.09062
C -0.02462  2.57148 -0.00006
C -0.07556  4.06945 -0.00007
H  0.40280  4.46418  0.89790
H  0.40189  4.46415 -0.89853
H -1.12213  4.39336  0.00048
O -0.01470  1.90204  1.09053
Ru  0.00097  0.07908 -0.00002

```

**f-3F** (κ<sup>2</sup>κ<sup>1</sup>)

```

SCF (B3LYP) Energy = -950.281732021
Enthalpy 0K = -950.036092
Enthalpy 298K = -950.010118
Free Energy 298K = -950.096046
Lowest Frequency = 16.2282 cm-1
Second Frequency = 30.3767 cm-1

```

```

Ru -0.35307  0.04678  0.00013
N -1.99196 -1.11003  0.00040
C -2.96962 -1.73579  0.00042
N  0.56974 -1.02443  1.40373
C  1.22179 -1.54213  2.20788
N  0.56959 -1.02479 -1.40330

```

## XYZ Coordinates and Computed Energies

## B3LYP Optimised Geometries and Energies

```

C 1.22161 -1.54269 -2.20734
C -4.20499 -2.50988 -0.00073
H -4.79978 -2.27426 -0.88861
H -3.98474 -3.58168 -0.00293
H -4.79915 -2.27779 0.88849
C 2.13732 -2.12492 3.17825
H 1.93398 -1.73655 4.18065
H 2.04371 -3.21458 3.19772
H 3.16119 -1.86070 2.89509
C 2.13656 -2.12482 -3.17865
H 1.93220 -1.73635 -4.18079
H 3.16054 -1.86018 -2.89627
H 2.04346 -3.21452 -3.19825
O -1.40837 1.55790 -1.09553
C -1.72528 2.13010 -0.00006
O -1.40824 1.55818 1.09552
C -2.42024 3.46465 -0.00019
H -3.03108 3.57642 0.89787
H -1.66131 4.25443 -0.00035
H -3.03122 3.57617 -0.89818
O 1.18889 1.42516 -0.00010
C 2.46204 1.15468 0.00003
O 2.98986 0.03754 0.00019
C 3.32064 2.42258 -0.00044
H 3.08949 3.03125 0.87951
H 4.38073 2.16291 -0.00050
H 3.08927 3.03076 -0.88067

```

 $m^{-3}\mathbf{F}$  ( $\kappa^2\kappa^{-1}$ )

```

SCF (B3LYP) Energy = -950.279416573
Enthalpy 0K = -950.034003
Enthalpy 298K = -950.007816
Free Energy 298K = -950.094853
Lowest Frequency = 19.1623 cm-1
Second Frequency = 30.5962 cm-1

```

```

Ru -0.33017 0.11951 -0.09198
N -1.69360 -1.34044 0.07484
C -2.48094 -2.17373 0.23912
N 0.71009 -0.91805 -1.42402
C 1.37807 -1.50520 -2.16631
N 1.04065 1.58313 -0.15168
C 1.90175 2.35374 -0.12001
C -3.47064 -3.21947 0.46327
H -2.97595 -4.18717 0.58858
H -4.04612 -3.00218 1.36806
H -4.15929 -3.28295 -0.38454
C 2.28815 -2.23460 -3.03837
H 1.89581 -3.23252 -3.25563
H 2.42797 -1.70209 -3.98407
H 3.25879 -2.33765 -2.54282
C 3.05033 3.24335 -0.03310
H 2.86824 4.03184 0.70279
H 3.92272 2.66013 0.27786
H 3.25626 3.70659 -1.00233
O -1.75955 1.36229 -1.18194
C -2.17317 1.84712 -0.07862
O -1.65053 1.43210 1.00807
C -3.23621 2.91668 -0.05598
H -3.86202 2.80838 0.83249
H -2.75601 3.90042 -0.01156
H -3.84385 2.86976 -0.96144
O 0.68658 -0.82907 1.45347
C 1.97885 -0.96303 1.53461
O 2.82256 -0.61218 0.70403
C 2.40584 -1.63257 2.84531
H 1.89139 -2.59071 2.96789
H 3.48608 -1.78827 2.85509
H 2.11883 -1.00349 3.69425

```

 $c^{-2}\mathbf{F}$  ( $2\kappa^2$ )

```

SCF (B3LYP) Energy = -817.512920900
Enthalpy 0K = -817.314290
Enthalpy 298K = -817.293360
Free Energy 298K = -817.367116
Lowest Frequency = 22.2612 cm-1
Second Frequency = 22.4648 cm-1

```

```

Ru -0.00000 0.08418 -0.00001
N 1.25056 -1.27852 -0.69044
C 2.00738 -2.04019 -1.13292
N -1.25054 -1.27856 0.69042
C -2.00733 -2.04025 1.13290
C 2.94971 -2.98454 -1.72000
H 3.67596 -2.45343 -2.34313
H 3.49141 -3.52483 -0.93754
H 2.42155 -3.71111 -2.34531
C -2.94962 -2.98464 1.72000
H -3.67842 -2.45310 2.33976
H -3.48831 -3.52795 0.93757
H -2.42188 -3.70861 2.34867
O 1.47424 1.62257 -0.26314
C 1.89599 1.42768 0.92513
C 2.95392 2.31412 1.52506
H 3.48125 1.79160 2.32515
H 3.65333 2.64299 0.75361
H 2.47355 3.20289 1.94873
O 1.36979 0.48348 1.60398
O -1.36979 0.48349 -1.60398
C -1.89606 1.42762 -0.92510
O -1.47428 1.62254 0.26315
C -2.95397 2.31408 -1.52504
H -3.65336 2.64299 -0.75358
H -2.47359 3.20282 -1.94875
H -3.48133 1.79154 -2.32510

```

 $t^{-2}\mathbf{F}$  ( $2\kappa^2$ ) (\* single point)

```

SCF (B3LYP) Energy = -817.509393243
Enthalpy 0K = -817.309749
Enthalpy 298K = -817.291262
Free Energy 298K = -817.354200
Lowest Frequency = 67.5790 cm-1
Second Frequency = 73.4840 cm-1

```

 $c^{-4}\mathbf{F}$  ( $2\kappa^1$ )

```

SCF (B3LYP) Energy = -1083.04584900
Enthalpy 0K = -1082.753417
Enthalpy 298K = -1082.722254
Free Energy 298K = -1082.820521
Lowest Frequency = 25.3315 cm-1
Second Frequency = 25.6705 cm-1

```

```

N -1.05756 1.71300 0.08764
C -1.74971 2.62224 -0.08021
N 1.29770 0.74781 1.53069
C 2.17040 1.16018 2.16949
N 1.05757 -1.71303 0.08727
C 1.74966 -2.62229 -0.08075
C -2.69956 3.69326 -0.34294
H -2.32486 4.34901 -1.13402
H -3.64563 3.24785 -0.66616
H -2.87356 4.28930 0.55741
C 3.35545 1.65705 2.85407
H 3.23585 2.71077 3.12226
H 3.54982 1.08284 3.76462
H 4.21013 1.55496 2.17750
C 2.69944 -3.69329 -0.34383
H 2.32459 -4.34888 -1.13497
H 3.64547 -3.24785 -0.66713
H 2.87358 -4.28948 0.55639

```

## XYZ Coordinates and Computed Energies

```
O -3.23108 -0.16399 -0.66820
C -2.44926 -0.70454 -1.46116
O -1.15874 -0.80431 -1.35720
C -2.97645 -1.34812 -2.74837
H -2.58291 -0.80956 -3.61670
H -2.62675 -2.38207 -2.82775
H -4.06762 -1.32245 -2.76725
O 1.15865 0.80467 -1.35713
C 2.44917 0.70496 -1.46115
O 3.23104 0.16430 -0.66833
C 2.97628 1.34876 -2.74829
H 2.62673 2.38279 -2.82736
H 4.06744 1.32295 -2.76732
H 2.58254 0.81048 -3.61669
Ru 0.00005 -0.00002 0.17863
N -1.29751 -0.74821 1.53059
C -2.17032 -1.16069 2.16917
C -3.35537 -1.65773 2.85363
H -3.54978 -1.08371 3.76429
H -4.21002 -1.55548 2.17703
H -3.23577 -2.71150 3.12160
```

**t-4F** (2κ<sup>1</sup>)

```
SCF (B3LYP) Energy = -1083.04588883
Enthalpy 0K = -1082.753547
Enthalpy 298K = -1082.722202
Free Energy 298K = -1082.821544
Lowest Frequency = 27.0707 cm-1
Second Frequency = 31.9921 cm-1
```

```
N -1.10380 -1.41252 -0.91360
C -1.80629 -2.17945 -1.41727
N -1.10344 1.41339 -0.91282
C -1.80566 2.18084 -1.41609
N 1.10380 1.41264 0.91366
C 1.80639 2.17955 1.41721
C -2.76376 -3.10638 -2.00363
H -2.76418 -3.01805 -3.09389
H -2.51345 -4.13699 -1.73601
H -3.76463 -2.87458 -1.62641
C -2.76290 3.10788 -2.00266
H -2.76235 3.02031 -3.09298
H -3.76402 2.87557 -1.62645
H -2.51309 4.13837 -1.73411
C 2.76352 3.10659 2.00395
H 2.76368 3.01811 3.09421
H 3.76452 2.87501 1.62696
H 2.51309 4.13718 1.73640
O -3.26002 -0.00053 0.60704
C -2.56024 -0.00059 1.62612
O -1.26291 -0.00039 1.69102
C -3.21417 -0.00035 3.01356
H -2.89290 -0.88003 3.58070
H -2.89378 0.88015 3.57993
H -4.30175 -0.00088 2.92076
O 1.26292 0.00046 -1.69094
C 2.56025 0.00042 -1.62606
O 3.26004 0.00013 -0.60699
C 3.21417 0.00030 -3.01350
H 2.89305 0.88013 -3.58049
H 4.30175 0.00061 -2.92072
H 2.89359 -0.88004 -3.58002
Ru -0.00002 0.00006 0.00004
N 1.10353 -1.41328 0.91286
C 1.80594 -2.18066 1.41594
C 2.76294 -3.10826 2.00202
H 2.76308 -3.02061 3.09234
H 2.51239 -4.13862 1.73367
H 3.76398 -2.87652 1.62523
```

## B3LYP Optimised Geometries and Energies

**1A<sup>+</sup>**

```
SCF (B3LYP) Energy = -688.275901402
Enthalpy 0K = -688.073328
Enthalpy 298K = -688.057032
Free Energy 298K = -688.119677
Lowest Frequency = 16.5271 cm-1
Second Frequency = 17.4999 cm-1
```

```
C 2.00892 -0.42944 1.42387
C 2.30679 0.77166 0.69648
C 2.30435 0.76224 -0.71312
C 2.00485 -0.44820 -1.42410
C 1.73136 -1.63113 -0.70846
C 1.73368 -1.62205 0.72510
Ru 0.34553 -0.00892 0.00001
O -0.83068 1.38429 -1.08263
C -1.29129 1.88905 -0.00022
C -2.31835 2.97357 -0.00032
H 2.44733 1.68651 -1.26168
H 1.44930 -2.51414 1.27145
O -0.83032 1.38484 1.08229
H -3.31711 2.52321 -0.00015
H -2.21947 3.58584 0.89764
H -2.21964 3.58552 -0.89853
H 1.93851 -0.40319 2.50543
H 1.44473 -2.53016 -1.24217
H 1.93195 -0.43638 -2.50572
H 2.45216 1.70291 1.23241
N -1.35984 -1.17627 0.00051
C -2.34163 -1.78656 0.00056
C -3.57678 -2.55714 0.00020
H -4.14802 -2.34029 0.90747
H -4.17762 -2.29187 -0.87449
H -3.34975 -3.62649 -0.03274
```

**1A**

```
SCF (B3LYP) Energy = -916.982589580
Enthalpy 0K = -916.729340
Enthalpy 298K = -916.707553
Free Energy 298K = -916.781811
Lowest Frequency = 16.4674 cm-1
Second Frequency = 37.8833 cm-1
```

```
Ru 0.26546 0.04970 -0.09898
O 1.42088 0.79890 1.56325
C 1.89684 1.71218 0.81172
C 2.79048 2.78853 1.36181
C -1.09836 -1.87282 0.15096
C -0.68837 -1.40236 1.42713
C -1.64501 -0.74977 2.26538
C -2.93776 -0.56632 1.83734
O 1.56094 1.70681 -0.42112
H 2.17212 3.63823 1.67128
H 3.33368 2.42235 2.23496
H 3.48455 3.13442 0.59325
C -3.35189 -1.05196 0.56795
C -2.45870 -1.70172 -0.25006
H -2.77893 -2.10727 -1.20490
H -3.65700 -0.06497 2.47874
H -0.48778 -2.58316 -0.39581
H -1.33523 -0.41076 3.24915
C -1.52215 1.18600 -1.41472
O -1.33715 1.46360 -0.18501
O -0.82091 0.24539 -1.92396
C -2.49749 1.96524 -2.25199
H -2.80948 1.38086 -3.11918
H -3.36271 2.25190 -1.65057
H -2.01100 2.88116 -2.60486
H 0.23449 -1.75609 1.87558
```

## XYZ Coordinates and Computed Energies

H -4.38589 -0.92735 0.25823  
 N 1.73373 -1.21454 -0.48506  
 C 2.62245 -1.91369 -0.75236  
 C 3.74010 -2.77260 -1.12468  
 H 4.46004 -2.21126 -1.72833  
 H 4.25001 -3.14850 -0.23253  
 H 3.38566 -3.62611 -1.71066

**<sup>1</sup>B<sup>+</sup>** (t-O,t-N)

SCF (B3LYP) Energy = -1167.64483201  
 Enthalpy 0K = -1167.271109  
 Enthalpy 298K = -1167.244242  
 Free Energy 298K = -1167.329644  
 Lowest Frequency = 26.1097 cm<sup>-1</sup>  
 Second Frequency = 31.1038 cm<sup>-1</sup>

Ru 0.40693 -0.30510 -0.33978  
 O 1.49816 -2.10994 -0.83643  
 C 1.37550 -1.83717 -2.07357  
 C 1.91493 -2.72330 -3.15302  
 C 0.58138 -1.05743 2.02045  
 C 1.92239 -1.27488 2.43197  
 C 2.67257 -0.22749 2.92932  
 C 2.11594 1.06916 3.02867  
 O 0.73221 -0.75867 -2.36570  
 H 2.37096 -2.11950 -3.94103  
 H 2.63879 -3.42639 -2.73972  
 H 1.09000 -3.28524 -3.60422  
 C -2.65574 -0.07783 0.00862  
 C -3.81594 -0.22044 0.78282  
 C -1.89929 -1.23157 -0.28516  
 C -4.20970 -1.47970 1.23855  
 H -4.39785 0.65320 1.05846  
 C -2.29476 -2.49237 0.17150  
 C -3.45304 -2.61650 0.93927  
 H -5.10926 -1.57199 1.83898  
 H -1.70807 -3.36778 -0.08904  
 H -3.76933 -3.59132 1.29582  
 H -1.15441 -1.20209 -1.10867  
 C 0.81336 1.29919 2.63050  
 C 0.02475 0.23501 2.12038  
 H -1.04417 0.37637 2.01885  
 H 2.70543 1.87635 3.45405  
 H -0.05438 -1.91475 1.83126  
 H 3.68711 -0.40379 3.27515  
 C -2.17063 1.24125 -0.44487  
 C -2.52166 3.52500 -1.15328  
 H -3.18626 4.35170 -1.38156  
 C -3.03479 2.30499 -0.72742  
 H -4.10457 2.15786 -0.63535  
 C -0.33064 2.56649 -1.00777  
 H 0.74502 2.62091 -1.11450  
 C -1.14041 3.65690 -1.29602  
 H -0.69046 4.58380 -1.63339  
 N -0.81968 1.38180 -0.58609  
 H 2.33697 -2.27623 2.38065  
 H 0.36804 2.28240 2.75032  
 N 2.14097 0.63736 -0.31508  
 C 3.19485 1.11535 -0.35554  
 C 4.52410 1.71042 -0.39788  
 H 5.26916 0.97741 -0.07492  
 H 4.76126 2.02957 -1.41693  
 H 4.57006 2.57816 0.26634

**TS(<sup>1</sup>B<sup>+</sup>-<sup>1</sup>C<sup>+</sup>)** (t-O,t-N)

SCF (B3LYP) Energy = -1167.60031917  
 Enthalpy 0K = -1167.232189  
 Enthalpy 298K = -1167.205837  
 Free Energy 298K = -1167.288934

## B3LYP Optimised Geometries and Energies

Lowest Frequency = -1120.7126 cm<sup>-1</sup>  
 Second Frequency = 26.6841 cm<sup>-1</sup>

Ru 0.31788 -0.31609 -0.15065  
 O 1.02588 -2.39777 -0.42534  
 C 0.48782 -2.55558 -1.53621  
 C 0.73033 -3.71547 -2.44215  
 C 0.83579 -0.61290 2.13686  
 C 2.20347 -0.93367 2.38411  
 C 3.14115 0.06842 2.49216  
 C 2.76231 1.43069 2.35570  
 O -0.35518 -1.60743 -1.95424  
 H 1.11552 -3.35454 -3.40110  
 H 1.43869 -4.40897 -1.98995  
 H -0.21832 -4.22115 -2.64779  
 C -2.59418 0.22005 0.14573  
 C -3.91728 0.11027 0.59177  
 C -1.69369 -0.87644 0.26717  
 C -4.36904 -1.08600 1.15005  
 H -4.59955 0.95219 0.52693  
 C -2.18137 -2.06724 0.83655  
 C -3.50453 -2.17594 1.27330  
 H -5.39568 -1.16428 1.49361  
 H -1.51963 -2.92514 0.93435  
 H -3.85970 -3.10474 1.70957  
 H -1.04772 -1.30890 -1.02434  
 C 1.45037 1.76449 2.11095  
 C 0.45739 0.74429 1.98785  
 H -0.58668 1.02320 2.07317  
 H 3.50844 2.20949 2.48438  
 H 0.08094 -1.36957 2.31636  
 H 4.17467 -0.17823 2.71800  
 C -2.03360 1.45668 -0.41756  
 C -2.14922 3.70032 -1.31471  
 H -2.72885 4.56799 -1.61257  
 C -2.78311 2.57706 -0.79802  
 H -3.86163 2.55675 -0.69848  
 C -0.06209 2.55455 -1.06309  
 H 1.01528 2.49475 -1.14707  
 C -0.75959 3.69105 -1.44824  
 H -0.22069 4.54373 -1.84545  
 N -0.67273 1.46008 -0.56461  
 H 2.48483 -1.97173 2.52883  
 H 1.14737 2.80615 2.06275  
 N 2.23906 0.29166 -0.74443  
 C 3.30190 0.52886 -1.14079  
 C 4.64240 0.81988 -1.63365  
 H 4.61846 0.99377 -2.71332  
 H 5.04012 1.71100 -1.13973  
 H 5.30613 -0.02453 -1.42629

**<sup>1</sup>C<sup>+</sup>** (t-O,t-N)

SCF (B3LYP) Energy = -1167.61567440  
 Enthalpy 0K = -1167.242254  
 Enthalpy 298K = -1167.215114  
 Free Energy 298K = -1167.301555  
 Lowest Frequency = 15.1499 cm<sup>-1</sup>  
 Second Frequency = 31.7977 cm<sup>-1</sup>

Ru -0.28206 0.13994 -0.14816  
 O -1.36073 2.03772 -0.40002  
 C -1.02311 2.99731 -1.10849  
 C -1.96556 4.10170 -1.47537  
 C -0.94830 0.51974 2.01014  
 C -2.37058 0.59599 2.18250  
 C -3.11355 -0.54731 2.32535  
 C -2.48374 -1.82807 2.31132  
 O 0.19390 3.14018 -1.61118  
 H -1.97659 4.23042 -2.56158  
 H -2.96635 3.88066 -1.10817

## XYZ Coordinates and Computed Energies

```

H -1.60757  5.04193 -1.04417
C  2.63090  0.02629  0.00173
C  3.96583  0.41863  0.17336
C  1.54973  0.91139  0.29517
C  4.26529  1.68932  0.66241
H  4.78052 -0.26067 -0.05972
C  1.89453  2.17369  0.81828
C  3.22868  2.56281  0.99404
H  5.29945  1.98939  0.79630
H  1.11366  2.87554  1.10668
H  3.45582  3.54663  1.39507
H  0.80520  2.48785 -1.20122
C -1.12654 -1.93455  2.14902
C -0.32169 -0.75685  1.98693
H  0.74385 -0.83291  2.17297
H -3.08518 -2.71817  2.47248
H -0.35489  1.40394  2.21358
H -4.18515 -0.48364  2.49050
C  2.23979 -1.31852 -0.43719
C  2.61633 -3.59353 -1.17027
H  3.29553 -4.39146 -1.45312
C  3.11505 -2.34948 -0.80329
H  4.18348 -2.17111 -0.80000
C  0.40787 -2.75018 -0.80648
H -0.66981 -2.85183 -0.78580
C  1.23516 -3.80353 -1.16833
H  0.80428 -4.76003 -1.44116
N  0.88700 -1.53743 -0.45846
H -2.84120  1.57187  2.23993
H -0.63855 -2.90285  2.20283
N -2.12620 -0.70811 -0.92248
C -3.09977 -1.06004 -1.44506
C -4.32925 -1.50077 -2.09284
H -5.09377 -0.72279 -2.01210
H -4.14480 -1.70696 -3.15112
H -4.70077 -2.41167 -1.61472

```

**<sup>1</sup>B<sup>+</sup>** (t-O,t-C6H6)

```

SCF (B3LYP) Energy = -1167.63658643
Enthalpy 0K = -1167.263015
Enthalpy 298K = -1167.236125
Free Energy 298K = -1167.321485
Lowest Frequency = 30.4592 cm-1
Second Frequency = 31.5336 cm-1

```

```

Ru  0.41063 -0.02712 -0.14757
O   1.78663 -1.60977 -0.57015
C   1.95863 -1.18325 -1.75981
C   2.87656 -1.87066 -2.72405
C   1.94597  1.29909  1.27701
C   2.69246  0.45613  2.14581
C   3.89542 -0.08061  1.73548
C   4.40559  0.22218  0.45431
O   1.31705 -0.12084 -2.09064
H   3.88344 -1.45325 -2.61577
H   2.92667 -2.93856 -2.50444
H   2.54614 -1.70148 -3.75031
C  -2.58007 -0.36266 -0.49814
C  -3.77965 -0.94076 -0.06553
C  -1.52461 -1.21442 -0.89053
C  -3.91676 -2.33046 -0.03172
H  -4.59806 -0.31452  0.27502
C  -1.65914 -2.60681 -0.84293
C  -2.86098 -3.16622 -0.41178
H  -4.85374 -2.76464  0.30369
H  -0.83251 -3.23691 -1.15375
H  -2.98089 -4.24423 -0.37832
H  -0.71608 -0.79791 -1.53219
C   3.69868  1.04185 -0.40652
C   2.45765  1.58432 -0.00521

```

## B3LYP Optimised Geometries and Energies

```

H   1.98750  2.31767 -0.64928
H   5.36895 -0.17940  0.15432
H   1.13019  1.88355  1.68868
H   4.46555 -0.71696  2.40480
C  -2.34863  1.09416 -0.48392
C  -3.11170  3.38267 -0.63544
H  -3.90704  4.10647 -0.77948
C  -3.38352  2.01968 -0.65972
H  -4.39051  1.66115 -0.83873
C  -0.80938  2.83058 -0.27119
H   0.21991  3.12470 -0.11350
C  -1.79530  3.79535 -0.43359
H  -1.52543  4.84506 -0.40727
N  -1.05792  1.50501 -0.29578
H   2.32051  0.26210  3.14658
H   4.09771  1.29610 -1.38288
N  -0.30085 -0.48145  1.68445
C  -0.70927 -0.83288  2.71140
C  -1.20599 -1.30330  3.99784
H  -0.60495 -2.14988  4.34298
H  -1.15225 -0.50345  4.74192
H  -2.24656 -1.62605  3.90173

```

TS (<sup>1</sup>B<sup>+</sup>-<sup>1</sup>C<sup>+</sup>) (t-O,t-C6H6)

```

SCF (B3LYP) Energy = -1167.60555158
Enthalpy 0K = -1167.237625
Enthalpy 298K = -1167.211006
Free Energy 298K = -1167.295862
Lowest Frequency = -1267.0782 cm-1
Second Frequency = 17.0267 cm-1

```

```

Ru -0.31066  0.01678  0.08187
O  -1.70028  1.69461  0.18587
C  -1.60383  2.01204 -1.01829
C  -2.45213  3.04248 -1.68602
C  -2.30203 -1.70219  0.47462
C  -3.26613 -1.10626  1.31452
C  -4.30530 -0.36461  0.76936
C  -4.40290 -0.20913 -0.62283
O  -0.68458  1.38611 -1.74420
H  -2.98670  2.58672 -2.52464
H  -3.16081  3.46910 -0.97677
H  -1.81179  3.82694 -2.10148
C   2.55565  0.57254 -0.37581
C   3.79971  1.20662 -0.27864
C   1.36878  1.26866 -0.01136
C   3.88216  2.52131  0.18279
H   4.71389  0.68116 -0.53590
C   1.48324  2.58356  0.47801
C   2.72863  3.20881  0.56791
H   4.85154  3.00463  0.25292
H   0.58872  3.12283  0.77680
H   2.80032  4.22688  0.93854
H   0.35834  1.35552 -1.03367
C  -3.45378 -0.78171 -1.46228
C  -2.39475 -1.53048 -0.91796
H  -1.72063 -2.05075 -1.58983
H  -5.23421  0.34812 -1.04475
H  -1.58562 -2.39614  0.90197
H  -5.05351  0.08069  1.41740
C   2.39263 -0.83626 -0.75762
C   3.17426 -2.98109 -1.55850
H   3.96175 -3.60587 -1.96702
C   3.41225 -1.64074 -1.28159
H   4.38704 -1.20948 -1.47468
C   0.92934 -2.66116 -0.79321
H  -0.06398 -3.03540 -0.58101
C   1.90829 -3.50655 -1.29757
H   1.67383 -4.54853 -1.48324
N   1.14309 -1.35360 -0.54207

```



## XYZ Coordinates and Computed Energies

H -3.20751 -1.25462 2.38829  
H -3.54006 -0.68127 -2.53984  
N 0.08797 -0.42536 1.95767  
C 0.35288 -0.61977 3.06970  
C 0.67418 -0.83852 4.47469  
H -0.09365 -0.38559 5.10892  
H 0.72664 -1.90928 4.69183  
H 1.63987 -0.38249 4.71175

**<sup>1</sup>C<sup>+</sup>** (t-O,t-C6H6)

SCF (B3LYP) Energy = -1167.64474056  
Enthalpy 0K = -1167.270874  
Enthalpy 298K = -1167.243773  
Free Energy 298K = -1167.330027  
Lowest Frequency = 20.5885 cm<sup>-1</sup>  
Second Frequency = 27.0640 cm<sup>-1</sup>

Ru -0.27348 -0.29703 0.37278  
O -2.33071 0.34580 0.53226  
C -2.81454 1.47886 0.64408  
C -4.24962 1.71719 0.99698  
C -1.89335 -3.00915 0.34316  
C -3.16002 -2.70466 -0.13088  
C -3.31688 -1.95802 -1.31527  
C -2.20510 -1.50759 -2.00866  
O -2.11415 2.58772 0.44824  
H -4.73967 0.77285 1.22738  
H -4.31491 2.39841 1.85006  
H -4.75389 2.20423 0.15615  
C 1.93154 0.72661 -1.23496  
C 2.61204 1.47928 -2.20574  
C 0.52433 0.84457 -1.07706  
C 1.91297 2.34782 -3.03856  
H 3.68775 1.38352 -2.32209  
C -0.16212 1.70081 -1.95296  
C 0.52505 2.44846 -2.91709  
H 2.44170 2.92908 -3.78671  
H -1.24581 1.77479 -1.91998  
H -0.03101 3.10531 -3.58035  
H -1.20959 2.35080 0.15957  
C -0.90263 -1.79506 -1.53632  
C -0.74556 -2.56137 -0.35969  
H 0.22218 -2.98610 -0.11841  
H -2.32334 -0.95937 -2.93833  
H -1.77425 -3.63475 1.22284  
H -4.31356 -1.75505 -1.69511  
C 2.57724 -0.25137 -0.36111  
C 4.42467 -1.49884 0.57651  
H 5.48580 -1.72227 0.62141  
C 3.94912 -0.53658 -0.30472  
H 4.63485 -0.00052 -0.95002  
C 2.17493 -1.85048 1.30898  
H 1.43280 -2.33713 1.93429  
C 3.52155 -2.17072 1.40573  
H 3.84855 -2.92556 2.11156  
N 1.70579 -0.92576 0.44701  
H -4.03681 -3.06849 0.39640  
H -0.04911 -1.58778 -2.17166  
N 0.23483 1.03974 1.75416  
C 0.57927 1.76994 2.58961  
C 1.00214 2.68193 3.64453  
H 0.36559 3.57178 3.65167  
H 0.93182 2.18907 4.61897  
H 2.03826 2.99098 3.47846

**<sup>1</sup>B<sup>+</sup>** (t-O,t-O)

SCF (B3LYP) Energy = -1167.64539468  
Enthalpy 0K = -1167.271537  
Enthalpy 298K = -1167.244743  
Free Energy 298K = -1167.330211

## B3LYP Optimised Geometries and Energies

Lowest Frequency = 24.0913 cm<sup>-1</sup>  
Second Frequency = 31.3675 cm<sup>-1</sup>

Ru -0.47559 0.24327 0.33969  
O -2.26385 0.69753 -0.60675  
C -2.96237 0.44014 0.44627  
C -4.45119 0.59825 0.43667  
C -0.25214 -1.95381 -1.02148  
C -0.91569 -2.33519 0.15892  
C -2.28686 -2.67658 0.10952  
C -2.97027 -2.62079 -1.09312  
O -2.31920 0.03950 1.46540  
H -4.83646 0.61375 1.45681  
H -4.73129 1.51123 -0.09391  
H -4.89562 -0.24704 -0.09856  
C 2.57674 -0.44981 0.37194  
C 3.67785 -1.31891 0.40524  
C 1.64712 -0.51106 1.43148  
C 3.85151 -2.20617 1.46787  
H 4.38656 -1.33071 -0.41637  
C 1.82088 -1.40016 2.49494  
C 2.92603 -2.25256 2.51328  
H 4.70913 -2.87136 1.47305  
H 1.10345 -1.40851 3.30972  
H 3.06752 -2.94317 3.33827  
H 0.91446 0.31353 1.62121  
C -2.31009 -2.21961 -2.27345  
C -0.96642 -1.89443 -2.24198  
H -0.44518 -1.62735 -3.15611  
H -4.01652 -2.90963 -1.13662  
H 0.82867 -1.88765 -1.03681  
H -2.78834 -3.00246 1.01461  
C 2.32555 0.44285 -0.77755  
C 3.01470 1.70943 -2.71705  
H 3.79470 2.07658 -3.37612  
C 3.33745 0.91045 -1.62546  
H 4.37016 0.65913 -1.41435  
C 0.71485 1.55672 -2.06500  
H -0.34019 1.77729 -2.18835  
C 1.67639 2.03344 -2.94659  
H 1.37678 2.64812 -3.78789  
N 1.02654 0.78330 -1.00529  
H -0.35372 -2.52236 1.06662  
H -2.85554 -2.19179 -3.21173  
N -0.45939 2.11761 1.01429  
C -0.51273 3.20294 1.41538  
C -0.58439 4.56223 1.93506  
H -1.12082 5.20530 1.23143  
H -1.11239 4.56539 2.89319  
H 0.42323 4.96077 2.08390

**<sup>1</sup>B<sup>+</sup>** (t-C6H6,t-O)

SCF (B3LYP) Energy = -1167.64758119  
Enthalpy 0K = -1167.273583  
Enthalpy 298K = -1167.246541  
Free Energy 298K = -1167.333188  
Lowest Frequency = 16.5467 cm<sup>-1</sup>  
Second Frequency = 29.1225 cm<sup>-1</sup>

Ru -0.32762 -0.17649 0.20763  
O -1.36671 -1.91214 0.70106  
C -1.79104 -2.05029 -0.50812  
C -2.69435 -3.17852 -0.89312  
C -2.42495 0.88505 1.27914  
C -1.94273 1.77708 0.30071  
C -2.66868 1.94404 -0.90455  
C -3.83128 1.22895 -1.12412  
O -1.40325 -1.16565 -1.33811  
H -2.44855 -3.52759 -1.89830  
H -2.62040 -3.99420 -0.17226

## XYZ Coordinates and Computed Energies

```

H -3.72763 -2.81660 -0.90602
C 2.08310 0.85687 -0.92539
C 2.90650 1.85512 -0.37304
C 0.97518 1.23022 -1.72014
C 2.62300 3.19893 -0.59257
H 3.76292 1.56838 0.22995
C 0.71143 2.59315 -1.94205
C 1.51962 3.57166 -1.37351
H 3.26560 3.96219 -0.16441
H -0.10939 2.87468 -2.59346
H 1.31469 4.62194 -1.55557
H 0.42313 0.48028 -2.27766
C -4.31162 0.33738 -0.14244
C -3.62261 0.16903 1.04577
H -4.00612 -0.49098 1.81699
H -4.39053 1.36926 -2.04392
H -1.98328 0.86114 2.26814
H -2.32352 2.66117 -1.64179
C 2.38353 -0.57959 -0.70294
C 3.79354 -2.52870 -0.69764
H 4.74820 -3.00708 -0.89099
C 3.62389 -1.16731 -0.94766
H 4.43039 -0.56183 -1.34627
C 1.50824 -2.61895 0.03522
H 0.64821 -3.13196 0.44778
C 2.71790 -3.26403 -0.20059
H 2.80708 -4.32375 0.01047
N 1.34733 -1.30475 -0.21322
H -1.13922 2.46792 0.53755
H -5.24277 -0.19566 -0.31165
N 0.52989 0.41980 1.92661
C 1.00181 0.71387 2.94489
C 1.57966 1.07180 4.23459
H 1.22912 0.38007 5.00643
H 2.67128 1.02233 4.18650
H 1.28458 2.08828 4.51086

```

TS (<sup>1</sup>B<sup>+</sup>-<sup>1</sup>C<sup>+</sup>) 1 (t-C<sub>6</sub>H<sub>6</sub>, t-O)

SCF (B3LYP) Energy = -1167.61764800  
 Enthalpy 0K = -1167.244715  
 Enthalpy 298K = -1167.218074  
 Free Energy 298K = -1167.304485  
 Lowest Frequency = -59.7924 cm<sup>-1</sup>  
 Second Frequency = 17.0569 cm<sup>-1</sup>

```

C 2.92325 -0.47494 -0.17795
N 1.82410 0.29124 -0.02489
C 1.94027 1.64530 0.01851
C 3.19686 2.25259 -0.05047
C 4.33551 1.46331 -0.18386
C 4.19527 0.07646 -0.25952
Ru -0.06233 -0.49343 0.21078
C -3.08316 -1.25072 -0.95391
C -2.26717 -1.72291 0.09934
C -2.35247 -1.10806 1.36604
C -3.25881 -0.04716 1.57682
C -4.07618 0.37929 0.53948
C -3.98292 -0.21750 -0.73095
H -1.84716 -1.54485 2.22002
C 0.66714 2.38680 0.09574
C 0.55438 3.60399 0.78080
C -0.66065 4.28880 0.79600
C -1.77366 3.77194 0.12604
C -1.67567 2.55728 -0.55215
C -0.46966 1.84711 -0.55629
H -4.63182 0.11745 -1.53451
O 0.44537 -1.89670 -1.15267
C 0.24468 -1.53328 -2.40444
O -0.20781 -0.43352 -2.72541
C 0.59107 -2.60810 -3.41322

```

## B3LYP Optimised Geometries and Energies

```

H 1.50601 -3.13369 -3.13072
H -0.21694 -3.34667 -3.44784
H 0.69842 -2.15924 -4.40112
H 1.41023 4.01037 1.31078
H -0.73730 5.23201 1.32782
H -2.52386 2.16218 -1.09834
H -2.70913 4.32243 0.12445
H 3.26674 3.33399 -0.03014
H -0.36115 1.01898 -1.29333
H -3.02986 -1.72638 -1.92739
H -4.80003 1.17050 0.71081
H -1.70811 -2.64229 -0.03336
H -3.34561 0.39766 2.56322
H 5.05381 -0.57310 -0.38705
H 5.31607 1.92378 -0.24723
H 2.74601 -1.54099 -0.24490
N 0.57553 -1.79613 1.53965
C 0.98209 -2.56760 2.30408
C 1.48783 -3.53770 3.26699
H 1.87061 -4.41853 2.74312
H 2.29479 -3.09610 3.85904
H 0.68500 -3.84996 3.94133

```

INT (<sup>1</sup>B<sup>+</sup>-<sup>1</sup>C<sup>+</sup>) (t-C<sub>6</sub>H<sub>6</sub>, t-O)

SCF (B3LYP) Energy = -1167.64118254  
 Enthalpy 0K = -1167.267532  
 Enthalpy 298K = -1167.240626  
 Free Energy 298K = -1167.326273  
 Lowest Frequency = 22.2156 cm<sup>-1</sup>  
 Second Frequency = 29.2309 cm<sup>-1</sup>

```

C 0.57234 -2.82199 -0.00809
N -0.12970 -1.68612 0.18920
C -1.44034 -1.77992 0.56137
C -2.04297 -3.03246 0.73393
C -1.31552 -4.19637 0.51730
C 0.02208 -4.08770 0.13724
Ru 0.78372 0.20349 0.13229
C -0.51944 2.54347 -1.92877
C 0.40546 1.47428 -2.00790
C -0.05526 0.17617 -2.31416
C -1.43534 -0.03660 -2.54953
C -2.32374 1.02061 -2.47814
C -1.86317 2.31663 -2.16352
H 0.64631 -0.61114 -2.56586
C -2.16877 -0.51655 0.78800
C -3.56054 -0.42209 0.64334
C -4.21194 0.79336 0.85111
C -3.49004 1.94189 1.18871
C -2.10462 1.86851 1.32750
C -1.45347 0.64799 1.13118
H -2.56740 3.14224 -2.12896
O 1.75202 0.17350 1.99609
C 2.16036 1.38924 1.86213
O 1.82087 1.98891 0.79215
C 2.96509 2.04947 2.93811
H 2.30126 2.33122 3.76263
H 3.70548 1.35149 3.33557
H 3.44980 2.94675 2.55189
H -4.13850 -1.28982 0.34284
H -5.29080 0.84547 0.74168
H -1.52984 2.74408 1.61113
H -4.00597 2.88254 1.35220
H -3.07376 -3.08362 1.06351
H -0.43705 0.55811 1.57083
H -0.15603 3.54429 -1.71871
H -3.37732 0.86045 -2.68467
H 1.46466 1.70422 -2.02045
H -1.78245 -1.02656 -2.82972
H 0.63790 -4.96327 -0.03448

```

## XYZ Coordinates and Computed Energies

H -1.77809 -5.16800 0.65596  
H 1.61014 -2.69212 -0.28670  
N 2.49068 -0.35418 -0.71071  
C 3.53528 -0.60098 -1.14911  
C 4.85100 -0.90851 -1.69553  
H 4.75113 -1.48093 -2.62228  
H 5.39070 0.01886 -1.90897  
H 5.42737 -1.49575 -0.97461

TS (<sup>1</sup>B<sup>+</sup>-<sup>1</sup>C<sup>+</sup>)<sub>2</sub> (t-C<sub>6</sub>H<sub>6</sub>, t-O)

SCF (B3LYP) Energy = -1167.60501540  
Enthalpy 0K = -1167.236929  
Enthalpy 298K = -1167.210097  
Free Energy 298K = -1167.296732  
Lowest Frequency = -892.8741 cm<sup>-1</sup>  
Second Frequency = 13.5112 cm<sup>-1</sup>

C 1.66775 -1.37920 -1.71912  
N 0.57764 -1.02681 -1.00397  
C -0.59677 -1.71209 -1.16792  
C -0.67015 -2.74863 -2.10756  
C 0.44449 -3.09398 -2.86034  
C 1.63988 -2.40043 -2.65682  
Ru 0.62038 0.45374 0.37219  
C -1.49721 3.17128 0.63117  
C -0.35448 2.80416 -0.10649  
C -0.49652 2.11610 -1.33209  
C -1.78771 1.80056 -1.79989  
C -2.90740 2.16777 -1.06481  
C -2.76190 2.85347 0.15208  
H 0.35635 1.97476 -1.98680  
C -1.68783 -1.29517 -0.28495  
C -3.02415 -1.65646 -0.49099  
C -4.00517 -1.22863 0.40342  
C -3.65961 -0.43337 1.49961  
C -2.32994 -0.05907 1.69871  
C -1.31608 -0.47074 0.81486  
H -3.64376 3.15249 0.71015  
O 1.95535 -0.61847 1.50168  
C 1.52005 -1.51446 2.32269  
O 0.30011 -1.78453 2.44399  
C 2.54375 -2.24702 3.15041  
H 2.53221 -3.30533 2.87258  
H 3.54201 -1.83754 2.99925  
H 2.26487 -2.18576 4.20542  
H -3.31250 -2.25821 -1.34749  
H -5.03894 -1.52142 0.24813  
H -2.06621 0.52474 2.57641  
H -4.42435 -0.11787 2.20312  
H -1.59970 -3.29315 -2.22208  
H -0.34951 -0.95171 1.53834  
H -1.38442 3.73208 1.55395  
H -3.90018 1.93857 -1.43841  
H 0.61090 3.20804 0.18475  
H -1.90377 1.30217 -2.75740  
H 2.54140 -2.64673 -3.20604  
H 0.38898 -3.90099 -3.58353  
H 2.56867 -0.81652 -1.51495  
N 2.35635 1.40141 -0.26298  
C 3.35375 1.93784 -0.51114  
C 4.61333 2.60588 -0.81213  
H 4.66579 2.85338 -1.87623  
H 4.69445 3.52802 -0.22917  
H 5.45106 1.95114 -0.55515

<sup>1</sup>C<sup>+</sup> (t-C<sub>6</sub>H<sub>6</sub>, t-O)

SCF (B3LYP) Energy = -1167.62670799  
Enthalpy 0K = -1167.253590  
Enthalpy 298K = -1167.226336  
Free Energy 298K = -1167.313556

## B3LYP Optimised Geometries and Energies

Lowest Frequency = 17.8716 cm<sup>-1</sup>  
Second Frequency = 24.6047 cm<sup>-1</sup>

C -1.20721 -0.79971 2.29185  
N -0.26426 -0.60324 1.34713  
C 1.01406 -1.05607 1.54809  
C 1.33482 -1.70497 2.74902  
C 0.36568 -1.89774 3.72421  
C -0.93449 -1.44041 3.49127  
Ru -0.63741 0.32661 -0.41590  
C 0.77591 3.16527 -1.25445  
C -0.35955 2.72834 -0.52924  
C -0.23397 2.40656 0.84478  
C 1.03412 2.52366 1.46614  
C 2.13591 2.93919 0.73882  
C 2.00646 3.26192 -0.62681  
H -1.11574 2.29042 1.46488  
C 1.92077 -0.81024 0.42874  
C 3.26866 -1.19881 0.41152  
C 4.04840 -0.95489 -0.71707  
C 3.47878 -0.32756 -1.82829  
C 2.13594 0.07200 -1.80684  
C 1.31891 -0.14486 -0.67979  
H 2.87293 3.60855 -1.18128  
O -1.42162 -1.49129 -1.17303  
C -0.92310 -2.46577 -1.76873  
O 0.34998 -2.57816 -2.06279  
C -1.76821 -3.61768 -2.22023  
H -1.37504 -4.54676 -1.79748  
H -2.80258 -3.47127 -1.91414  
H -1.70712 -3.70723 -3.30921  
H 3.71646 -1.69691 1.26686  
H 5.08951 -1.26043 -0.73474  
H 1.72633 0.57167 -2.68257  
H 4.08107 -0.14526 -2.71413  
H 2.34694 -2.05814 2.90679  
H 0.84936 -1.78410 -1.74486  
H 0.66595 3.45553 -2.29497  
H 3.10088 3.04075 1.22545  
H -1.34556 2.86577 -0.96645  
H 1.12638 2.32330 2.52927  
H -1.72540 -1.57576 4.22004  
H 0.61616 -2.40089 4.65258  
H -2.19546 -0.42623 2.05495  
N -2.76487 0.79015 -0.17341  
C -3.90457 1.00761 -0.17085  
C -5.33782 1.27488 -0.17313  
H -5.56510 2.11857 0.48467  
H -5.67066 1.51656 -1.18674  
H -5.88336 0.39395 0.17707

<sup>1</sup>B<sup>+</sup> (t-N, t-O)

SCF (B3LYP) Energy = -1167.64565238  
Enthalpy 0K = -1167.271623  
Enthalpy 298K = -1167.244674  
Free Energy 298K = -1167.330544  
Lowest Frequency = 23.1807 cm<sup>-1</sup>  
Second Frequency = 24.6171 cm<sup>-1</sup>

Ru -0.70707 -0.18865 -0.03070  
O -1.49770 -2.12236 -0.05367  
C -1.76188 -2.04206 -1.30823  
C -2.44490 -3.15214 -2.04071  
C -0.62070 -0.52128 2.37439  
C 0.19970 -1.60702 2.78574  
C 1.55181 -1.42090 2.98409  
C 2.13161 -0.14239 2.80082  
O -1.42755 -0.95001 -1.87956  
H -2.12026 -3.17016 -3.08275  
H -2.24319 -4.10895 -1.55603

## XYZ Coordinates and Computed Energies

```

H -3.52686 -2.98034 -2.02394
C 1.49889 1.47683 -0.98886
C 2.20867 2.53532 -0.39855
C 0.23447 1.73537 -1.56992
C 1.65641 3.81290 -0.34739
H 3.18486 2.34777 0.03774
C -0.31655 3.02750 -1.49579
C 0.38171 4.05818 -0.87450
H 2.21729 4.62222 0.11029
H -1.27388 3.22202 -1.96954
H -0.04200 5.05638 -0.82785
H -0.22587 1.00396 -2.22444
C 1.35008 0.92501 2.41076
C -0.04107 0.75221 2.16677
H -0.66905 1.63271 2.07345
H 3.18795 0.00206 3.00714
H -1.69623 -0.63447 2.44184
H 2.17132 -2.24678 3.32129
C 2.05255 0.09940 -0.98216
C 3.79053 -1.53415 -1.31242
H 4.79982 -1.79384 -1.61515
C 3.35911 -0.20949 -1.36158
H 4.01360 0.58154 -1.71056
C 1.61742 -2.14435 -0.49993
H 0.89155 -2.86364 -0.13982
C 2.90323 -2.51751 -0.87692
H 3.19564 -3.56028 -0.82494
N 1.19996 -0.86520 -0.54711
H -0.25947 -2.57197 2.97530
H 1.78025 1.91642 2.32387
N -2.56779 0.57197 0.32652
C -3.64131 0.97695 0.48903
C -4.99058 1.49223 0.68521
H -4.95540 2.44098 1.22840
H -5.47218 1.65574 -0.28325
H -5.58536 0.77700 1.26058

```

TS (**<sup>1</sup>B<sup>+</sup>-<sup>1</sup>C<sup>+</sup>**) (t-N,t-O)

```

SCF (B3LYP) Energy = -1167.61617449
Enthalpy 0K = -1167.243686
Enthalpy 298K = -1167.217229
Free Energy 298K = -1167.302091
Lowest Frequency = -94.1102 cm-1
Second Frequency = 23.4579 cm-1

```

```

C -2.07489 -1.36965 0.97388
N -1.44398 -0.26499 0.53360
C -2.09432 0.93145 0.55996
C -3.43030 1.01723 0.95591
C -4.09348 -0.13468 1.37222
C -3.39828 -1.34399 1.39974
Ru 0.54186 -0.15644 -0.13226
C 0.68002 -2.11427 -1.54862
C -0.32872 -3.09340 -1.34078
C -1.58126 -2.94021 -1.90187
C -1.87505 -1.80338 -2.69224
C -0.91125 -0.83996 -2.91839
C 0.38645 -0.98354 -2.35302
H -2.33812 -3.70616 -1.76324
C -1.25807 2.09458 0.20551
C -1.75396 3.21259 -0.47693
C -0.90637 4.27608 -0.78966
C 0.44524 4.24139 -0.42770
C 0.95512 3.13738 0.25288
C 0.11717 2.05351 0.55964
H 1.19166 -0.36303 -2.73478
O 1.04509 -1.58605 1.20424
C 1.39765 -1.10886 2.38043
O 1.39133 0.09388 2.65284
C 1.84312 -2.16913 3.36418

```

## B3LYP Optimised Geometries and Energies

```

H 1.67933 -1.81198 4.38190
H 1.31954 -3.11284 3.19961
H 2.91522 -2.35058 3.23199
H -2.79628 3.24511 -0.77909
H -1.30171 5.13718 -1.31929
H 1.99181 3.11486 0.57255
H 1.09126 5.08065 -0.66494
H -3.92327 1.98260 0.97233
H 0.48371 1.32357 1.33010
H 1.70192 -2.35383 -1.28097
H -1.11882 0.00572 -3.56673
H -0.08739 -3.98205 -0.76603
H -2.85591 -1.70695 -3.14813
H -3.86649 -2.25676 1.75057
H -5.12805 -0.08410 1.69600
H -1.48491 -2.27584 0.98131
N 2.52101 0.11518 -0.56261
C 3.66114 0.25333 -0.71480
C 5.09650 0.43817 -0.88501
H 5.54209 0.75731 0.06184
H 5.56176 -0.50144 -1.19624
H 5.29157 1.20004 -1.64519

```

**<sup>1</sup>C<sup>+</sup>** (t-N,t-O)

```

SCF (B3LYP) Energy = -1167.64883446
Enthalpy 0K = -1167.275024
Enthalpy 298K = -1167.248103
Free Energy 298K = -1167.333812
Lowest Frequency = 19.1859 cm-1
Second Frequency = 29.7834 cm-1

```

```

C -2.17146 -0.01133 -1.86032
N -1.40687 -0.27059 -0.78316
C -1.80458 -1.22026 0.11371
C -3.01509 -1.90096 -0.07230
C -3.80590 -1.62026 -1.18008
C -3.37516 -0.66081 -2.09947
Ru 0.47577 0.56024 -0.42771
C -1.39229 3.18133 -0.69261
C -2.61364 2.90019 -0.10818
C -2.67291 2.26614 1.15335
C -1.51030 1.92497 1.81761
C -0.24208 2.19181 1.23470
C -0.18646 2.82391 -0.03191
H -3.63763 2.07710 1.61407
C -0.85338 -1.44022 1.20708
C -1.06692 -2.34371 2.25896
C -0.11008 -2.50401 3.25910
C 1.06906 -1.75762 3.21238
C 1.29320 -0.84806 2.17038
C 0.34511 -0.67087 1.14698
H 0.74631 3.25456 -0.38514
O 1.22262 -0.84018 -1.80608
C 1.82709 -1.92152 -1.69702
O 2.08072 -2.49907 -0.54274
C 2.31870 -2.67367 -2.89451
H 1.78767 -3.62846 -2.96295
H 2.15291 -2.09201 -3.79983
H 3.38130 -2.90306 -2.77597
H -1.98233 -2.92630 2.30541
H -0.28264 -3.20594 4.06824
H 2.21059 -0.26643 2.16568
H 1.81847 -1.87735 3.98983
H -3.32672 -2.65208 0.64371
H 1.68830 -1.97544 0.19619
H -1.34430 3.71649 -1.63652
H 0.64291 2.12133 1.85632
H -3.53380 3.19351 -0.60473
H -1.55465 1.48118 2.80698
H -3.95446 -0.41814 -2.98296

```

## XYZ Coordinates and Computed Energies

## B3LYP Optimised Geometries and Energies

H -4.74265 -2.14754 -1.33023  
 H -1.79331 0.74336 -2.54122  
 N 2.37431 1.22220 -0.10999  
 C 3.46535 1.60239 0.00913  
 C 4.83763 2.07103 0.15965  
 H 5.49143 1.23893 0.43744  
 H 5.19369 2.50065 -0.78145  
 H 4.89102 2.83673 0.93908

**4G<sup>+</sup>** ( $\kappa^1$ )

SCF (B3LYP) Energy = -1333.74184339  
 Enthalpy 0K = -1333.327868  
 Enthalpy 298K = -1333.292114  
 Free Energy 298K = -1333.401393  
 Lowest Frequency = 13.0004  $\text{cm}^{-1}$   
 Second Frequency = 22.3243  $\text{cm}^{-1}$

N 2.05964 -1.86430 0.34598  
 C 2.86340 -2.69486 0.38723  
 N 1.32115 0.30936 2.06919  
 C 1.70269 0.67675 3.09783  
 C 2.19248 1.14717 4.38760  
 H 2.24403 0.31712 5.09788  
 H 3.19181 1.57651 4.27173  
 H 1.52233 1.91324 4.78791  
 C 3.89025 -3.72883 0.43044  
 H 3.63121 -4.54654 -0.24802  
 H 4.85269 -3.30782 0.12574  
 H 3.98373 -4.12762 1.44447  
 O 1.66355 1.44470 -2.50403  
 C 2.54646 1.31316 -1.65746  
 C 3.96354 1.82376 -1.90260  
 H 4.66319 0.98190 -1.93055  
 H 4.00872 2.36510 -2.84812  
 H 4.28236 2.47696 -1.08487  
 O 2.41167 0.75791 -0.47359  
 N 0.34564 -0.90868 -1.67648  
 C 0.30917 -1.13411 -2.80833  
 C 0.31426 -1.27883 -4.25590  
 H -0.70643 -1.34199 -4.64314  
 H 0.80675 -0.39439 -4.67281  
 H 0.86268 -2.17628 -4.55425  
 N -0.46916 1.50354 0.12787  
 C 0.28339 2.61827 0.29391  
 C -1.81842 1.66262 0.05170  
 C -0.23976 3.89845 0.40452  
 H 1.35033 2.44828 0.33470  
 C -2.40392 2.93246 0.17078  
 C -1.61994 4.06474 0.34943  
 H 0.43385 4.73930 0.52746  
 H -3.48253 3.00918 0.09606  
 H -2.07453 5.04703 0.43160  
 C -2.75306 0.52338 -0.18153  
 C -3.72925 0.22601 0.78232  
 C -2.78441 -0.15035 -1.40930  
 C -4.69792 -0.74835 0.53431  
 H -3.73182 0.76574 1.72536  
 C -3.75276 -1.12428 -1.65658  
 H -2.06569 0.11437 -2.17511  
 C -4.70914 -1.42954 -0.68590  
 H -5.45613 -0.95802 1.28377  
 H -3.77654 -1.62973 -2.61764  
 H -5.47205 -2.17560 -0.88752  
 Ru 0.75565 -0.31147 0.21749  
 N -0.68599 -1.50405 1.03509  
 C -1.41032 -2.27000 1.51412  
 C -2.34192 -3.22216 2.10534  
 H -3.36695 -2.89359 1.91467  
 H -2.19857 -4.21280 1.66428  
 H -2.18060 -3.29017 3.18501

**3G** ( $2\kappa^1$ )

SCF (B3LYP) Energy = -1429.63366227  
 Enthalpy 0K = -1429.216413  
 Enthalpy 298K = -1429.180039  
 Free Energy 298K = -1429.288572  
 Lowest Frequency = 20.1982  $\text{cm}^{-1}$   
 Second Frequency = 26.9951  $\text{cm}^{-1}$

N 0.81680 -0.83762 1.37204  
 C 1.62657 -1.33218 2.03533  
 N -1.62289 -1.96052 0.57381  
 C -2.10966 -2.99932 0.70976  
 C 2.67352 -2.00068 2.79481  
 H 2.84943 -2.99218 2.36603  
 H 3.60028 -1.42316 2.73862  
 H 2.38300 -2.11313 3.84352  
 C -2.61413 -4.36181 0.79809  
 H -2.78093 -4.64966 1.83996  
 H -3.55603 -4.45840 0.25060  
 H -1.87110 -5.03233 0.35476  
 O -3.67517 1.51163 -0.24981  
 C -3.33848 0.70429 -1.13348  
 O -2.20625 0.08828 -1.23762  
 C -4.30543 0.37179 -2.27195  
 H -3.80365 0.48291 -3.23744  
 H -4.61972 -0.67460 -2.19300  
 H -5.18424 1.01767 -2.22831  
 O 0.18605 -1.15811 -1.51050  
 C 0.56870 -2.39887 -1.58174  
 O 0.66299 -3.21152 -0.65493  
 C 0.91939 -2.81818 -3.01384  
 H 1.64040 -2.12363 -3.45752  
 H 1.32766 -3.83052 -3.02480  
 H 0.01970 -2.77948 -3.63680  
 N 0.23502 1.68689 -0.35597  
 C 1.53651 2.07980 -0.43188  
 C -0.71564 2.63674 -0.54436  
 C 1.87676 3.41623 -0.69842  
 C -0.43370 3.96971 -0.81871  
 H -1.74422 2.31168 -0.43709  
 C 0.89363 4.37567 -0.90056  
 H 2.92770 3.67417 -0.76359  
 H -1.25641 4.66244 -0.96002  
 H 1.15958 5.40618 -1.11746  
 C 2.67831 1.13903 -0.24021  
 C 2.89473 0.05568 -1.10128  
 C 3.63575 1.42847 0.74598  
 C 4.03893 -0.73136 -0.96436  
 H 2.14878 -0.17619 -1.85083  
 C 4.77784 0.63789 0.88300  
 H 3.47980 2.27437 1.41018  
 C 4.98299 -0.44512 0.02411  
 H 4.19274 -1.57047 -1.63649  
 H 5.51024 0.87566 1.65004  
 H 5.87614 -1.05655 0.12023  
 Ru -0.66923 -0.24759 0.16388  
 N -1.63477 0.69076 1.65776  
 C -2.32837 1.24560 2.40062  
 C -3.32443 1.97457 3.17194  
 H -3.76866 1.33455 3.93971  
 H -2.88312 2.85013 3.65675  
 H -4.10398 2.29790 2.47418

**1G** ( $2\kappa^2$ ) (\* single point)

SCF (B3LYP) Energy = -1164.10195520  
 Enthalpy 0K = -1163.779266  
 Enthalpy 298K = -1163.755188  
 Free Energy 298K = -1163.830240  
 Lowest Frequency = 53.6712  $\text{cm}^{-1}$

## XYZ Coordinates and Computed Energies

## B3LYP Optimised Geometries and Energies

Second Frequency = 59.2192 cm<sup>-1</sup>

**<sup>2</sup>G<sup>+</sup>** (κ<sup>2</sup>)

SCF (B3LYP) Energy = -1068.18950621

Enthalpy 0K = -1067.870343

Enthalpy 298K = -1067.844720

Free Energy 298K = -1067.928884

Lowest Frequency = 22.6219 cm<sup>-1</sup>

Second Frequency = 25.6038 cm<sup>-1</sup>

|    |          |          |          |
|----|----------|----------|----------|
| Ru | 0.71566  | -0.19935 | 0.10548  |
| N  | -0.15956 | -1.72477 | -0.89726 |
| C  | -0.59044 | -2.62603 | -1.48053 |
| C  | -1.12777 | -3.76716 | -2.20968 |
| H  | -2.22084 | -3.75057 | -2.18044 |
| H  | -0.79939 | -3.73286 | -3.25239 |
| H  | -0.77476 | -4.69790 | -1.75630 |
| O  | 2.27392  | -1.58075 | 0.69306  |
| C  | 2.91548  | -1.28124 | -0.36156 |
| O  | 2.36701  | -0.41725 | -1.14517 |
| C  | 4.25611  | -1.86781 | -0.68388 |
| H  | 5.03944  | -1.21384 | -0.28526 |
| H  | 4.35869  | -2.84857 | -0.21695 |
| H  | 4.39139  | -1.93796 | -1.76472 |
| N  | -0.52013 | 1.20753  | -0.80609 |
| C  | -1.82613 | 1.30958  | -0.43330 |
| C  | -0.02950 | 2.03031  | -1.75431 |
| C  | -2.65282 | 2.27856  | -1.01503 |
| C  | -0.80808 | 2.99971  | -2.37307 |
| H  | 1.01345  | 1.87846  | -2.01106 |
| C  | -2.14434 | 3.12945  | -1.99058 |
| H  | -3.68146 | 2.37050  | -0.68668 |
| H  | -0.37029 | 3.63635  | -3.13354 |
| H  | -2.77906 | 3.88450  | -2.44296 |
| C  | -2.29115 | 0.34303  | 0.58079  |
| C  | -1.35627 | -0.26198 | 1.44674  |
| C  | -3.62966 | -0.06698 | 0.65888  |
| C  | -1.74385 | -1.24380 | 2.36034  |
| H  | -0.35350 | 0.20103  | 1.62973  |
| C  | -4.01984 | -1.04112 | 1.57889  |
| H  | -4.36706 | 0.34841  | -0.02040 |
| C  | -3.08192 | -1.63490 | 2.42759  |
| H  | -1.00396 | -1.68375 | 3.02127  |
| H  | -5.06111 | -1.34445 | 1.62563  |
| H  | -3.39263 | -2.39229 | 3.14006  |
| N  | 1.71885  | 1.27089  | 1.07618  |
| C  | 2.34440  | 2.07675  | 1.62425  |
| C  | 3.13504  | 3.08140  | 2.32303  |
| H  | 3.64766  | 2.62492  | 3.17479  |
| H  | 3.88104  | 3.50806  | 1.64641  |
| H  | 2.48630  | 3.88307  | 2.68730  |

**<sup>3</sup>G<sup>+</sup>** (κ<sup>2</sup>)

SCF (B3LYP) Energy = -1200.95937148

Enthalpy 0K = -1200.593182

Enthalpy 298K = -1200.562427

Free Energy 298K = -1200.658955

Lowest Frequency = 22.4675 cm<sup>-1</sup>

Second Frequency = 23.9783 cm<sup>-1</sup>

|   |          |         |          |
|---|----------|---------|----------|
| N | -1.43559 | 0.77593 | -1.55226 |
| C | -1.95483 | 1.03628 | -2.55178 |
| N | -1.83016 | 1.14843 | 1.25156  |
| C | -2.63671 | 1.66249 | 1.90350  |
| C | -3.66387 | 2.29206 | 2.72375  |
| H | -4.19491 | 3.05303 | 2.14477  |
| H | -4.38245 | 1.53752 | 3.05705  |
| H | -3.21286 | 2.76507 | 3.60073  |
| C | -2.61268 | 1.29718 | -3.82418 |
| H | -2.79456 | 0.34567 | -4.33301 |

|    |          |          |          |
|----|----------|----------|----------|
| H  | -3.56833 | 1.80266  | -3.65993 |
| H  | -1.98083 | 1.92631  | -4.45714 |
| O  | -1.46377 | -2.17607 | -1.76131 |
| C  | -2.13825 | -2.21636 | -0.72423 |
| C  | -3.21691 | -3.26915 | -0.51650 |
| H  | -4.14826 | -2.80440 | -0.18174 |
| H  | -3.38433 | -3.82269 | -1.44088 |
| H  | -2.90380 | -3.96620 | 0.26786  |
| O  | -2.00015 | -1.40220 | 0.28736  |
| N  | 0.96177  | 1.57406  | -0.03374 |
| C  | 0.72322  | 2.89108  | 0.12868  |
| C  | 2.20754  | 1.16933  | -0.40723 |
| C  | 1.69485  | 3.86439  | -0.06087 |
| H  | -0.28642 | 3.15318  | 0.42189  |
| C  | 3.22517  | 2.10785  | -0.62683 |
| C  | 2.97352  | 3.46311  | -0.45019 |
| H  | 1.44716  | 4.90961  | 0.08657  |
| H  | 4.19936  | 1.76724  | -0.95705 |
| H  | 3.75671  | 4.19414  | -0.62319 |
| C  | 2.42252  | -0.28379 | -0.56084 |
| C  | 3.67618  | -0.86080 | -0.30776 |
| C  | 1.35183  | -1.13599 | -0.90286 |
| C  | 3.85555  | -2.24112 | -0.40499 |
| H  | 4.50989  | -0.23605 | -0.00349 |
| C  | 1.52994  | -2.51834 | -0.99504 |
| H  | 0.39520  | -0.77709 | -1.34608 |
| C  | 2.78642  | -3.07276 | -0.74772 |
| H  | 4.83438  | -2.66729 | -0.20693 |
| H  | 0.68124  | -3.12534 | -1.28934 |
| H  | 2.93419  | -4.14502 | -0.82998 |
| Ru | -0.56120 | 0.09652  | 0.15363  |
| N  | 0.22326  | -0.68348 | 1.85415  |
| C  | 0.60448  | -1.19277 | 2.81958  |
| C  | 1.08157  | -1.85291 | 4.02775  |
| H  | 1.89610  | -2.53903 | 3.77906  |
| H  | 1.44724  | -1.11325 | 4.74548  |
| H  | 0.26750  | -2.42204 | 4.48563  |

**<sup>1</sup>G** (κ<sup>2</sup>κ<sup>1</sup>)

SCF (B3LYP) Energy = -1164.09455274

Enthalpy 0K = -1163.772754

Enthalpy 298K = -1163.746505

Free Energy 298K = -1163.831341

Lowest Frequency = 22.1427 cm<sup>-1</sup>

Second Frequency = 26.0904 cm<sup>-1</sup>

|    |          |          |          |
|----|----------|----------|----------|
| Ru | -0.68988 | 0.25458  | -0.03294 |
| N  | 0.15305  | 1.92503  | -0.75716 |
| C  | 0.58486  | 2.91439  | -1.18269 |
| C  | 1.12207  | 4.16446  | -1.70569 |
| H  | 2.17890  | 4.26198  | -1.44008 |
| H  | 1.03031  | 4.19338  | -2.79569 |
| H  | 0.57686  | 5.01546  | -1.28601 |
| O  | -2.34675 | 1.45244  | 0.72712  |
| C  | -2.96052 | 1.24127  | -0.36289 |
| O  | -2.34365 | 0.60253  | -1.28907 |
| C  | -4.38279 | 1.68603  | -0.56713 |
| H  | -5.05137 | 0.87440  | -0.26051 |
| H  | -4.59856 | 2.56095  | 0.04887  |
| H  | -4.56879 | 1.90154  | -1.62129 |
| O  | -1.80102 | -1.39101 | 0.55112  |
| C  | -1.54686 | -2.03805 | 1.65023  |
| O  | -0.59888 | -1.81238 | 2.41404  |
| C  | -2.55768 | -3.13411 | 1.96491  |
| H  | -2.78784 | -3.71646 | 1.06880  |
| H  | -2.17613 | -3.78495 | 2.75287  |
| H  | -3.49146 | -2.67324 | 2.30465  |
| N  | 0.55623  | -1.01271 | -1.05949 |
| C  | 1.86411  | -1.12420 | -0.69042 |
| C  | 0.07467  | -1.78573 | -2.05319 |

## XYZ Coordinates and Computed Energies

C 2.71155 -2.02314 -1.34904  
 C 0.87262 -2.68973 -2.74184  
 H -0.97747 -1.64803 -2.27615  
 C 2.21760 -2.80934 -2.38409  
 H 3.74244 -2.11689 -1.02688  
 H 0.44148 -3.28904 -3.53618  
 H 2.86668 -3.51324 -2.89568  
 C 2.27290 -0.25671 0.42501  
 C 1.26021 0.23785 1.27930  
 C 3.59836 0.15350 0.62299  
 C 1.59190 1.10853 2.32235  
 H 0.29480 -0.36083 1.44841  
 C 3.91696 1.02892 1.66083  
 H 4.38029 -0.18499 -0.05082  
 C 2.91468 1.50958 2.50978  
 H 0.80824 1.45173 2.99033  
 H 4.94767 1.34009 1.80450  
 H 3.16812 2.18654 3.32065

TS (<sup>1</sup>G-<sup>1</sup>H)

SCF (B3LYP) Energy = -1164.08713356  
 Enthalpy 0K = -1163.769691  
 Enthalpy 298K = -1163.743915  
 Free Energy 298K = -1163.827140  
 Lowest Frequency = -1074.7533 cm<sup>-1</sup>  
 Second Frequency = 19.4648 cm<sup>-1</sup>

Ru -0.71518 0.12417 -0.08210  
 N -0.19547 1.92108 -0.75585  
 C 0.06301 2.98051 -1.15151  
 C 0.37876 4.31655 -1.64113  
 H 1.40151 4.58850 -1.36369  
 H 0.28867 4.35585 -2.73101  
 H -0.30707 5.05043 -1.20682  
 O -2.52395 0.97992 0.76294  
 C -3.15298 0.73944 -0.31847  
 O -2.51258 0.24895 -1.30679  
 C -4.63557 0.99354 -0.41732  
 H -5.17025 0.08292 -0.12578  
 H -4.93141 1.79639 0.26068  
 H -4.91294 1.23623 -1.44512  
 O -1.50870 -1.73657 0.48394  
 C -1.06916 -2.25705 1.55773  
 O -0.13715 -1.74183 2.24545  
 C -1.70373 -3.53956 2.04341  
 H -2.32804 -3.98178 1.26650  
 H -0.92928 -4.24247 2.35950  
 H -2.32325 -3.31707 2.91842  
 N 0.75148 -0.84989 -1.14790  
 C 2.04345 -0.75530 -0.71298  
 C 0.46131 -1.60334 -2.22649  
 C 3.06520 -1.43076 -1.39439  
 C 1.43624 -2.29083 -2.93724  
 H -0.58743 -1.63065 -2.50287  
 C 2.76469 -2.19985 -2.51229  
 H 4.08419 -1.36310 -1.03039  
 H 1.15516 -2.88398 -3.80050  
 H 3.55203 -2.72861 -3.04095  
 C 2.21514 0.07531 0.48364  
 C 1.02047 0.39903 1.18941  
 C 3.45433 0.58917 0.89048  
 C 1.13694 1.24384 2.30910  
 H 0.22133 -0.63778 1.54437  
 C 3.53319 1.42440 2.00306  
 H 4.35658 0.36451 0.32739  
 C 2.37124 1.75384 2.71068  
 H 0.24145 1.48542 2.87604  
 H 4.49500 1.82100 2.31550  
 H 2.43348 2.40506 3.57889

## B3LYP Optimised Geometries and Energies

<sup>1</sup>H

SCF (B3LYP) Energy = -1164.10394730  
 Enthalpy 0K = -1163.781607  
 Enthalpy 298K = -1163.755077  
 Free Energy 298K = -1163.841488  
 Lowest Frequency = 17.0325 cm<sup>-1</sup>  
 Second Frequency = 26.3616 cm<sup>-1</sup>

Ru 0.63519 0.21568 0.11031  
 N 0.57857 2.08286 -0.45413  
 C 0.57519 3.19336 -0.79695  
 C 0.58467 4.58633 -1.22576  
 H -0.43418 4.92833 -1.43237  
 H 1.01510 5.22496 -0.44774  
 H 1.17927 4.70034 -2.13773  
 O 2.53834 -0.04817 -0.86853  
 C 3.21663 0.27797 0.17075  
 O 2.62561 0.60339 1.23885  
 C 4.72723 0.29713 0.08156  
 H 5.16803 0.13846 1.06752  
 H 5.07975 -0.45969 -0.62250  
 H 5.05302 1.27687 -0.28562  
 O 0.91186 -1.77507 0.87317  
 C 0.82013 -2.85031 0.27131  
 O 0.34783 -2.96727 -0.95520  
 C 1.24934 -4.14944 0.88980  
 H 1.56076 -3.98385 1.92014  
 H 0.42913 -4.87157 0.84971  
 H 2.08110 -4.56586 0.31295  
 N -1.04172 0.39051 1.30907  
 C -2.25399 0.12418 0.73104  
 C -0.97898 0.69511 2.61854  
 C -3.42217 0.16524 1.50527  
 C -2.10626 0.75252 3.42905  
 H 0.01806 0.88977 3.00099  
 C -3.35211 0.48019 2.85736  
 H -4.37847 -0.05246 1.04279  
 H -2.00397 1.00231 4.47943  
 H -4.25566 0.51199 3.45907  
 C -2.16603 -0.18024 -0.69900  
 C -0.83451 -0.18521 -1.21926  
 C -3.27802 -0.41598 -1.52039  
 C -0.70273 -0.40700 -2.60722  
 H 0.06118 -2.07415 -1.26994  
 C -3.10377 -0.65711 -2.88212  
 H -4.28465 -0.40684 -1.10827  
 C -1.81391 -0.64618 -3.42335  
 H 0.29130 -0.38560 -3.05153  
 H -3.96492 -0.84323 -3.51723  
 H -1.67465 -0.81979 -4.48816

<sup>2</sup>G

SCF (B3LYP) Energy = -1296.86375774  
 Enthalpy 0K = -1296.494884  
 Enthalpy 298K = -1296.463403  
 Free Energy 298K = -1296.560764  
 Lowest Frequency = 30.8547 cm<sup>-1</sup>  
 Second Frequency = 32.6806 cm<sup>-1</sup>

N -1.94276 1.03553 0.84222  
 C -2.85298 1.60689 1.26841  
 C -4.03426 2.29772 1.76573  
 H -4.36586 1.84827 2.70628  
 H -3.81679 3.35540 1.94077  
 H -4.84024 2.21807 1.02997  
 O -3.15422 0.26979 -1.77721  
 C -2.76366 -0.88758 -1.62033  
 O -1.70861 -1.28295 -0.95871  
 C -3.53446 -2.06731 -2.21847  
 H -2.87049 -2.69186 -2.82423

## XYZ Coordinates and Computed Energies

```

H -3.92592 -2.69775 -1.41362
H -4.36064 -1.70336 -2.83137
O -0.70863 -1.46611 1.60280
C -0.41420 -1.18681 2.83546
O 0.10889 -0.13456 3.23181
C -0.76526 -2.30213 3.81545
H -1.82966 -2.54448 3.74020
H -0.21001 -3.20989 3.55869
H -0.52297 -2.00108 4.83560
N 1.17411 -1.25118 -0.51819
C 2.43823 -0.76353 -0.38949
C 0.98201 -2.51904 -0.92802
C 3.54233 -1.57074 -0.68967
C 2.04155 -3.36009 -1.24721
H -0.05761 -2.81913 -0.99686
C 3.34524 -2.87707 -1.12489
H 4.54358 -1.17809 -0.55392
H 1.84174 -4.37448 -1.57498
H 4.19605 -3.51218 -1.35258
C 2.54557 0.62935 0.08380
C 1.47884 1.18433 0.82856
C 3.63747 1.44282 -0.25041
C 1.53756 2.51988 1.24015
H 0.76743 0.54659 1.44899
C 3.68117 2.77615 0.15624
H 4.44314 1.04418 -0.85998
C 2.62972 3.31801 0.90086
H 0.72936 2.91619 1.84635
H 4.53348 3.39298 -0.11365
H 2.66835 4.35482 1.22275
Ru -0.42347 -0.06460 0.08995
N -0.31311 1.15099 -1.51593
C -0.39426 1.80580 -2.46685
C -0.60416 2.59749 -3.67087
H -0.42695 3.65828 -3.47126
H 0.06967 2.27345 -4.46937
H -1.63878 2.46504 -4.00261

```

TS (<sup>2</sup>G-<sup>2</sup>H)

```

SCF (B3LYP) Energy = -1296.85431990
Enthalpy 0K = -1296.489895
Enthalpy 298K = -1296.459021
Free Energy 298K = -1296.554073
Lowest Frequency = -1133.9072 cm-1
Second Frequency = 28.8952 cm-1

```

```

N 1.87341 -1.24210 0.72539
C 2.79893 -1.88376 0.99105
C 4.02567 -2.61984 1.26130
H 4.31807 -2.50388 2.30898
H 3.89549 -3.68508 1.04926
H 4.82250 -2.22341 0.62409
O 3.42364 0.35478 -1.28643
C 2.94728 1.40256 -0.83764
O 1.79682 1.55468 -0.24950
C 3.73162 2.71581 -0.93766
H 3.13791 3.47410 -1.45860
H 3.93777 3.10251 0.06567
H 4.67178 2.55742 -1.46885
O 0.43118 0.86698 2.10636
C -0.27482 0.30773 2.99853
O -1.01594 -0.70018 2.76951
C -0.24341 0.87031 4.40100
H 0.47573 1.68634 4.47401
H -1.24140 1.23100 4.66825
H 0.01452 0.07683 5.10805
N -1.15082 1.32717 -0.29462
C -2.39016 0.78527 -0.47221
C -0.97757 2.66049 -0.35604
C -3.48886 1.62083 -0.71853

```

## B3LYP Optimised Geometries and Energies

```

C -2.03276 3.53014 -0.60333
H 0.04649 2.98909 -0.21148
C -3.31140 2.99782 -0.78603
H -4.47537 1.18693 -0.83481
H -1.85180 4.59870 -0.64540
H -4.16059 3.64924 -0.97073
C -2.44273 -0.68051 -0.37489
C -1.31175 -1.32268 0.21191
C -3.50762 -1.42960 -0.89512
C -1.32289 -2.73037 0.24948
H -0.92086 -0.88704 1.45723
C -3.48134 -2.82176 -0.84165
H -4.34808 -0.93233 -1.37229
C -2.38307 -3.47257 -0.27001
H -0.48690 -3.24704 0.71448
H -4.30896 -3.39589 -1.24823
H -2.36006 -4.55872 -0.22632
Ru 0.40273 0.02562 0.17005
N 0.59204 -0.59778 -1.72125
C 0.84334 -0.90131 -2.80879
C 1.26746 -1.24267 -4.15918
H 1.13129 -2.31130 -4.34859
H 0.69118 -0.67914 -4.89873
H 2.32748 -0.99216 -4.26716

```

<sup>2</sup>H

```

SCF (B3LYP) Energy = -1296.86759061
Enthalpy 0K = -1296.498211
Enthalpy 298K = -1296.466778
Free Energy 298K = -1296.563807
Lowest Frequency = 23.6217 cm-1
Second Frequency = 27.9328 cm-1

```

```

N 1.67590 -1.58707 -0.18809
C 2.61680 -2.24618 -0.33696
C 3.91758 -2.87312 -0.51914
H 4.17768 -3.49143 0.34487
H 3.93330 -3.49844 -1.41636
H 4.65079 -2.06563 -0.62292
O 3.65224 0.63244 -0.54574
C 3.14810 1.26805 0.39294
O 1.93015 1.19618 0.82516
C 4.00643 2.27618 1.17162
H 3.58560 3.28275 1.07099
H 3.99855 2.03213 2.23890
H 5.03331 2.27557 0.80093
O 0.12430 -0.57726 2.12883
C -0.47959 -1.52773 2.63527
O -1.19752 -2.39147 1.94091
C -0.45402 -1.79194 4.11352
H 0.18473 -1.06160 4.60805
H -1.47062 -1.73578 4.51435
H -0.08522 -2.80474 4.30052
N -1.04459 1.43536 0.31844
C -2.32811 1.17021 -0.06830
C -0.73168 2.61494 0.88438
C -3.32285 2.14067 0.12526
C -1.68150 3.60745 1.09548
H 0.31450 2.71696 1.15828
C -3.00070 3.36159 0.70617
H -4.34318 1.93189 -0.17531
H -1.38999 4.54560 1.55516
H -3.77067 4.11286 0.85708
C -2.51943 -0.15871 -0.66386
C -1.35620 -0.99532 -0.68714
C -3.74265 -0.58196 -1.20524
C -1.51646 -2.25706 -1.30145
H -1.20057 -2.09403 0.99246
C -3.85740 -1.84314 -1.78639
H -4.61246 0.07046 -1.18665

```



## XYZ Coordinates and Computed Energies

```
C -2.73795 -2.67888 -1.83598
H -0.65811 -2.92378 -1.36553
H -4.80696 -2.16796 -2.20179
H -2.81706 -3.66123 -2.29686
Ru 0.34193 -0.09123 0.03837
N 0.76756 0.51496 -1.78379
C 1.13719 0.89260 -2.81435
C 1.70286 1.38621 -4.06222
H 1.53370 0.67306 -4.87445
H 1.24928 2.34291 -4.33807
H 2.78041 1.52975 -3.93291
```

## B3LYP Optimised Geometries and Energies

## XYZ Coordinates and Computed Energies

<sup>-</sup>OAc (\* single point)  
 SCF (PBE1PBE) Energy = -228.245942673  
 Enthalpy 0K = -228.197670  
 Enthalpy 298K = -228.192698  
 Free Energy 298K = -228.223892  
 Lowest Frequency = 270.2044 cm<sup>-1</sup>  
 Second Frequency = 435.2273 cm<sup>-1</sup>

AcOH  
 SCF (PBE1PBE) Energy = -228.836379514  
 Enthalpy 0K = -228.773762  
 Enthalpy 298K = -228.768283  
 Free Energy 298K = -228.800882  
 Lowest Frequency = 77.3662 cm<sup>-1</sup>  
 Second Frequency = 421.5018 cm<sup>-1</sup>

O -0.77050 -1.04286 0.00002  
 H -1.70831 -0.80144 0.00003  
 C -0.09268 0.12222 -0.00001  
 O -0.64661 1.19474 -0.00001  
 C 1.39014 -0.10487 -0.00001  
 H 1.67772 -0.68605 0.88051  
 H 1.67771 -0.68611 -0.88049  
 H 1.90505 0.85443 -0.00004

**a-H**, 2-phenylpyridine  
 SCF (PBE1PBE) Energy = -478.784925840  
 Enthalpy 0K = -478.613658  
 Enthalpy 298K = -478.603964  
 Free Energy 298K = -478.648377  
 Lowest Frequency = 47.5470 cm<sup>-1</sup>  
 Second Frequency = 95.6566 cm<sup>-1</sup>

N -1.35932 -1.15297 -0.20610  
 C -2.68788 -1.20060 -0.21381  
 C -3.50571 -0.09023 -0.02348  
 H -3.12753 -2.18254 -0.38408  
 H -4.58623 -0.18827 -0.04542  
 C 0.72198 0.02869 -0.00552  
 C 1.46408 1.19877 -0.20674  
 C 2.79835 -1.20446 0.20283  
 C 2.85440 1.16843 -0.19724  
 H 0.95813 2.14023 -0.39978  
 C 3.52724 -0.03234 0.01220  
 H 3.31545 -2.14646 0.36293  
 H 3.41348 2.08510 -0.36250  
 H 4.61329 -0.05538 0.02062  
 C -0.76067 0.02975 -0.00187  
 C -2.88881 1.13473 0.20572  
 H -3.47949 2.03005 0.37889  
 C -1.50228 1.19800 0.22304  
 H -1.00228 2.13778 0.43088  
 C 1.40959 -1.17550 0.19024  
 H 0.82870 -2.08125 0.32893

Benzene (C<sub>6</sub>H<sub>6</sub>)  
 SCF (PBE1PBE) Energy = -231.969040346  
 Enthalpy 0K = -231.868678  
 Enthalpy 298K = -231.863433  
 Free Energy 298K = -231.896112  
 Lowest Frequency = 437.0575 cm<sup>-1</sup>  
 Second Frequency = 437.0837 cm<sup>-1</sup>

C 0.00000 1.40481 0.00000  
 C -1.21659 0.70239 0.00000  
 C -1.21659 -0.70239 0.00000  
 C 0.00000 -1.40480 0.00000  
 C 1.21659 -0.70239 0.00000  
 C 1.21658 0.70240 0.00000  
 H -2.16519 1.25006 0.00000

## PBE1PBE Optimised Geometries and Energies

H -2.16518 -1.25007 0.00000  
 H 0.00001 -2.50014 0.00000  
 H 2.16519 -1.25006 0.00000  
 H 2.16518 1.25007 0.00000  
 H -0.00001 2.50001 0.00000

MeCN  
 SCF (PBE1PBE) Energy = -132.592559640  
 Enthalpy 0K = -132.546833  
 Enthalpy 298K = -132.542300  
 Free Energy 298K = -132.570835  
 Lowest Frequency = 391.5366 cm<sup>-1</sup>  
 Second Frequency = 391.5799 cm<sup>-1</sup>

C 0.00000 -1.17638 0.00000  
 H -1.02582 -1.55384 0.00000  
 H 0.51292 -1.55385 0.88839  
 H 0.51292 -1.55385 -0.88839  
 C 0.00000 0.27754 0.00000  
 N -0.00001 1.43637 0.00000

**A**  
 SCF (PBE1PBE) Energy = -783.402744060  
 Enthalpy 0K = -783.194298  
 Enthalpy 298K = -783.177869  
 Free Energy 298K = -783.239119  
 Lowest Frequency = 12.2221 cm<sup>-1</sup>  
 Second Frequency = 59.3681 cm<sup>-1</sup>

C 1.79241 -0.82810 1.41653  
 C 2.48248 0.20156 0.69996  
 C 2.47940 0.19633 -0.70940  
 C 1.78826 -0.83937 -1.41643  
 C 1.12653 -1.86366 -0.70992  
 C 1.12844 -1.85819 0.72030  
 Ru 0.42536 0.07505 -0.00092  
 O -0.27881 1.76824 -1.08437  
 C -0.62779 2.32720 0.00132  
 C -1.44319 3.57787 0.00227  
 H 2.90328 1.03228 -1.25481  
 H 0.50145 -2.56938 1.24195  
 O -1.57374 -0.29807 -0.00603  
 C -2.13423 -1.47462 0.00038  
 O -1.55731 -2.55771 0.00935  
 O -0.28287 1.76398 1.08615  
 C -3.64801 -1.38524 -0.00397  
 H -3.98883 -0.82948 0.87418  
 H -3.98454 -0.83393 -0.88651  
 H -4.08244 -2.38508 -0.00222  
 H -2.50120 3.29717 -0.00073  
 H -1.24427 4.16178 0.90223  
 H -1.24028 4.16571 -0.89423  
 H 1.69853 -0.75874 2.49506  
 H 0.49786 -2.57881 -1.22412  
 H 1.69174 -0.77876 -2.49523  
 H 2.90898 1.04118 1.23760

**B<sup>+</sup>**  
 SCF (PBE1PBE) Energy = -1033.76535648  
 Enthalpy 0K = -1033.434761  
 Enthalpy 298K = -1033.413588  
 Free Energy 298K = -1033.484657  
 Lowest Frequency = 33.4217 cm<sup>-1</sup>  
 Second Frequency = 43.1431 cm<sup>-1</sup>

C -0.27432 -2.16634 -0.76662  
 C -2.79482 -1.37929 1.91522  
 C -3.82327 -1.84185 1.09513  
 C -4.06750 -1.22178 -0.12881  
 C -2.22877 0.30313 0.27500

## XYZ Coordinates and Computed Energies

```

C -1.36120  3.78411 -0.85511
O  1.08137 -0.14083  1.87116
C  2.09071  0.62296  1.75192
O  2.54791  0.75830  0.56846
C  2.68558  1.34000  2.91094
H -1.86569  4.72537 -1.05021
H  2.48901  0.79548  3.83532
H  3.75816  1.47375  2.76160
H  2.22679  2.33141  2.99021
H -4.87584 -1.56854 -0.76534
H -4.44390 -2.67294  1.41624
H -2.61916 -1.84301  2.88134
C  0.60810  2.44166 -0.74836
H  1.67809  2.30540 -0.85183
C  0.01436  3.66321 -1.01535
H  0.62794  4.49525 -1.34228
C -1.42626  1.46611 -0.17201
Ru  1.02704 -0.46546 -0.22777
C  2.31650 -1.44179 -1.66328
H  3.30144 -1.07847 -1.93953
C  2.18153 -2.30757 -0.54127
H  3.05669 -2.61687  0.01843
C  0.88478 -2.63463 -0.08375
H  0.76924 -3.17985  0.84764
C  1.17736 -0.96633 -2.36018
H  1.29071 -0.27241 -3.18514
C -0.11515 -1.33190 -1.89469
H -0.99449 -0.89035 -2.35166
H -1.26378 -2.37276 -0.37483
C -2.07732  2.67609 -0.42811
H -3.14814  2.72929 -0.26511
C -3.28267 -0.14433 -0.53144
H -3.48300  0.34842 -1.47997
N -0.08611  1.35806 -0.34321
C -1.99603 -0.31404  1.50960
H -1.19497  0.04017  2.14945

```

TS (B<sup>+</sup>-C<sup>+</sup>)

```

SCF (PBE1PBE) Energy = -1033.73990959
Enthalpy 0K = -1033.410800
Enthalpy 298K = -1033.389901
Free Energy 298K = -1033.461070
Lowest Frequency = -93.4009 cm-1
Second Frequency = 27.7703 cm-1

```

```

C  1.57663  2.38279 -0.34774
N  1.27456  1.09844 -0.13313
C  2.21152  0.25104  0.33917
C  3.52112  0.66554  0.54946
C  3.84929  1.99426  0.29739
C  2.86090  2.86936 -0.14298
Ru -0.57739  0.15690 -0.49101
C -2.63302  0.02783 -1.26022
C -1.88683  1.02378 -1.96192
C -0.65560  0.67381 -2.57730
C -0.15975 -0.66166 -2.51086
C -0.87394 -1.61102 -1.75712
C -2.12509 -1.27491 -1.14592
H -0.05728  1.44597 -3.05147
C  1.67362 -1.09332  0.62754
C  2.29769 -2.27283  0.21805
C  1.68382 -3.49718  0.47192
C  0.44538 -3.56394  1.12016
C -0.17592 -2.39702  1.54566
C  0.43283 -1.15516  1.30569
H -2.62626 -1.98697 -0.50135
O -1.12823  1.45096  1.00184
C -2.08502  1.06238  1.81735
O -2.59420 -0.05255  1.79208
C -2.49317  2.12908  2.80338

```

## PBE1PBE Optimised Geometries and Energies

```

H -1.61834  2.50316  3.34147
H -2.92991  2.97845  2.26986
H -3.22108  1.72537  3.50638
H  3.24663 -2.23419 -0.30907
H  2.17450 -4.41392  0.15753
H -1.11898 -2.41671  2.08335
H -0.01237 -4.52951  1.31161
H  4.25501 -0.03647  0.93059
H  0.05726 -0.27327  1.82292
H -3.51675  0.30412 -0.69717
H -0.43989 -2.58992 -1.57941
H -2.22376  2.05445 -1.96718
H  0.80606 -0.90985 -2.93633
H  3.07431  3.91648 -0.32609
H  4.86255  2.34730  0.46139
H  0.76411  3.01842 -0.68253

```

C<sup>+</sup>

```

SCF (PBE1PBE) Energy = -1033.76540400
Enthalpy 0K = -1033.435183
Enthalpy 298K = -1033.413849
Free Energy 298K = -1033.485920
Lowest Frequency = 19.3940 cm-1
Second Frequency = 28.7907 cm-1

```

```

C  0.40294  2.72122  0.02005
N  0.59740  1.41651 -0.22649
C  1.85170  0.95115 -0.45194
C  2.93484  1.83386 -0.46685
C  2.72838  3.18494 -0.23973
C  1.43739  3.64104  0.01870
Ru -0.95297  0.02124 -0.21263
C -3.04758 -0.66875  0.04289
C -3.15581  0.75312 -0.10196
C -2.53288  1.37759 -1.18152
C -1.79135  0.59833 -2.13070
C -1.77143 -0.81163 -2.03412
C -2.42890 -1.45816 -0.94388
H -2.55227  2.45902 -1.27323
C  1.92107 -0.49588 -0.62228
C  3.10508 -1.18987 -0.88900
C  3.09361 -2.57542 -0.99226
C  1.89834 -3.26722 -0.81871
C  0.71231 -2.57549 -0.55873
C  0.68655 -1.17548 -0.46444
H -2.38884 -2.53560 -0.83571
O -0.71665  0.15230  1.91720
C -0.09616 -0.51680  2.75561
O  0.66992 -1.53039  2.45702
C -0.17893 -0.21188  4.21218
H  0.81735  0.04351  4.58462
H -0.86744  0.61222  4.38908
H -0.50462 -1.10409  4.75398
H  4.04278 -0.65667 -1.01753
H  4.01317 -3.11302 -1.19919
H -0.20144 -3.14895 -0.42361
H  1.88315 -4.35131 -0.88715
H  3.93408  1.45550 -0.64822
H  0.70676 -1.64565  1.47771
H -3.45146 -1.14499  0.93041
H -1.20736 -1.39526 -2.75302
H -3.64729  1.33928  0.66660
H -1.24672  1.09030 -2.92920
H  1.23049  4.68653  0.21675
H  3.56550  3.87587 -0.25349
H -0.61809  3.01967  0.22867

```

## B.OAc

```

SCF (PBE1PBE) Energy = -1262.17247458
Enthalpy 0K = -1261.791919

```

## XYZ Coordinates and Computed Energies

## PBE1PBE Optimised Geometries and Energies

Enthalpy 298K = -1261.764768  
 Free Energy 298K = -1261.850468  
 Lowest Frequency = 28.9137 cm<sup>-1</sup>  
 Second Frequency = 37.9768 cm<sup>-1</sup>

|    |          |          |          |
|----|----------|----------|----------|
| C  | -0.54621 | -1.80002 | 1.39878  |
| N  | -0.28403 | -0.55507 | 0.96040  |
| C  | -1.10586 | 0.45359  | 1.32505  |
| C  | -2.19250 | 0.21260  | 2.16700  |
| C  | -2.44917 | -1.06783 | 2.63070  |
| C  | -1.60621 | -2.09786 | 2.23600  |
| Ru | 1.27327  | -0.40531 | -0.48272 |
| C  | 2.54257  | -0.56866 | -2.25532 |
| C  | 1.54860  | -1.59542 | -2.25671 |
| C  | 0.17288  | -1.27835 | -2.16445 |
| C  | -0.22186 | 0.08203  | -2.02490 |
| C  | 0.74750  | 1.10828  | -1.97879 |
| C  | 2.13245  | 0.77311  | -2.08536 |
| H  | -0.62669 | -2.01596 | -2.02425 |
| C  | -0.88357 | 1.83466  | 0.82969  |
| C  | -1.87623 | 2.42155  | 0.03500  |
| C  | -1.71321 | 3.72996  | -0.41410 |
| C  | -0.57891 | 4.46034  | -0.06404 |
| C  | 0.40133  | 3.87801  | 0.73793  |
| C  | 0.25289  | 2.56813  | 1.18557  |
| H  | 2.88279  | 1.54395  | -1.93806 |
| O  | 2.31330  | -1.73329 | 0.82448  |
| C  | 2.76653  | -0.75993 | 1.50608  |
| O  | 2.48986  | 0.40998  | 1.10330  |
| C  | 3.55902  | -0.99200 | 2.75101  |
| H  | 4.21662  | -0.14397 | 2.94673  |
| H  | 2.86903  | -1.09697 | 3.59480  |
| H  | 4.13447  | -1.91523 | 2.66613  |
| H  | -2.72515 | 1.81213  | -0.27294 |
| H  | -2.47621 | 4.17752  | -1.04478 |
| H  | 1.28306  | 4.44582  | 1.02174  |
| H  | -0.46022 | 5.48298  | -0.41181 |
| H  | -2.82767 | 1.04839  | 2.43700  |
| H  | 1.02245  | 2.11047  | 1.79831  |
| H  | 3.59645  | -0.82350 | -2.26030 |
| H  | 0.45291  | 2.13040  | -1.76614 |
| H  | 1.86441  | -2.63431 | -2.23464 |
| H  | -1.29357 | 0.24160  | -1.79337 |
| H  | -1.77169 | -3.12448 | 2.54115  |
| H  | -3.29891 | -1.25921 | 3.27894  |
| H  | 0.12634  | -2.57409 | 1.05228  |
| O  | -2.38584 | -2.29050 | -1.17129 |
| C  | -3.21045 | -1.35758 | -1.01612 |
| C  | -4.62905 | -1.73582 | -0.57846 |
| H  | -4.72341 | -2.81057 | -0.41086 |
| H  | -4.89483 | -1.19259 | 0.33473  |
| H  | -5.34259 | -1.42362 | -1.34794 |
| O  | -3.00562 | -0.12025 | -1.18616 |

TS(B-C)1.OAc (\* single point)  
 SCF (PBE1PBE) Energy = -1262.14185881  
 Enthalpy 0K = -1261.765705  
 Enthalpy 298K = -1261.740805  
 Free Energy 298K = -1261.817507  
 Lowest Frequency = -70.4683 cm<sup>-1</sup>  
 Second Frequency = 40.8335 cm<sup>-1</sup>

INT(B-C).OAc  
 SCF (PBE1PBE) Energy = -1262.15188720  
 Enthalpy 0K = -1261.772677  
 Enthalpy 298K = -1261.745163  
 Free Energy 298K = -1261.833370  
 Lowest Frequency = 17.2424 cm<sup>-1</sup>  
 Second Frequency = 27.7331 cm<sup>-1</sup>

|    |          |          |          |
|----|----------|----------|----------|
| C  | -1.57024 | 1.21592  | 1.02241  |
| N  | -0.32353 | 1.06542  | 0.55977  |
| C  | 0.57142  | 2.07653  | 0.63774  |
| C  | 0.21659  | 3.29796  | 1.19715  |
| C  | -1.07810 | 3.47062  | 1.67996  |
| C  | -1.97755 | 2.42007  | 1.59155  |
| Ru | 0.29984  | -0.73524 | -0.30210 |
| C  | 0.95082  | -2.39629 | -1.60835 |
| C  | -0.27770 | -2.72227 | -1.00457 |
| C  | -1.38452 | -1.82186 | -1.08231 |
| C  | -1.25817 | -0.60367 | -1.80517 |
| C  | -0.02801 | -0.27612 | -2.44020 |
| C  | 1.07419  | -1.14854 | -2.29690 |
| H  | -2.30342 | -1.94791 | -0.50827 |
| C  | 1.91190  | 1.78033  | 0.10585  |
| C  | 2.69509  | 2.74980  | -0.52613 |
| C  | 3.93744  | 2.41234  | -1.05521 |
| C  | 4.41967  | 1.10592  | -0.96374 |
| C  | 3.64907  | 0.13140  | -0.33911 |
| C  | 2.39966  | 0.46420  | 0.18592  |
| H  | 2.05099  | -0.83906 | -2.65534 |
| O  | 0.07700  | -1.36736 | 1.65297  |
| C  | 1.02175  | -2.10853 | 2.15473  |
| O  | 2.09672  | -2.34063 | 1.59883  |
| C  | 0.68589  | -2.66251 | 3.52096  |
| H  | 0.45824  | -1.84230 | 4.20714  |
| H  | -0.21159 | -3.28416 | 3.45767  |
| H  | 1.52057  | -3.24923 | 3.90442  |
| H  | 2.31898  | 3.76334  | -0.63089 |
| H  | 4.53320  | 3.17539  | -1.54771 |
| H  | 4.00851  | -0.88634 | -0.21923 |
| H  | 5.39599  | 0.85668  | -1.36838 |
| H  | 0.95433  | 4.08962  | 1.27019  |
| H  | 1.95253  | -0.29576 | 0.86031  |
| H  | 1.82271  | -3.01837 | -1.44432 |
| H  | 0.09863  | 0.68586  | -2.92448 |
| H  | -0.34162 | -3.59886 | -0.36819 |
| H  | -2.09583 | 0.12127  | -1.72520 |
| H  | -3.00054 | 2.51231  | 1.93753  |
| H  | -1.37325 | 4.41845  | 2.12015  |
| H  | -2.26241 | 0.37444  | 0.89540  |
| O  | -3.77887 | -0.64871 | 0.19905  |
| C  | -4.25435 | 0.28120  | -0.51442 |
| C  | -5.77101 | 0.46529  | -0.47078 |
| H  | -6.24724 | -0.36497 | -1.00374 |
| H  | -6.12777 | 0.42447  | 0.56236  |
| H  | -6.07124 | 1.40376  | -0.94099 |
| O  | -3.59621 | 1.05710  | -1.25592 |

TS(B-C)2.OAc  
 SCF (PBE1PBE) Energy = -1262.14864379  
 Enthalpy 0K = -1261.773369  
 Enthalpy 298K = -1261.747610  
 Free Energy 298K = -1261.829954  
 Lowest Frequency = -660.2145 cm<sup>-1</sup>  
 Second Frequency = -7.2970 cm<sup>-1</sup>

|    |          |          |          |
|----|----------|----------|----------|
| C  | -1.46009 | 1.42677  | 0.62322  |
| N  | -0.22622 | 1.08939  | 0.22624  |
| C  | 0.72312  | 2.03505  | 0.01669  |
| C  | 0.43319  | 3.37993  | 0.22041  |
| C  | -0.84420 | 3.74531  | 0.63324  |
| C  | -1.79916 | 2.76005  | 0.83509  |
| Ru | 0.29231  | -0.89258 | -0.12581 |
| C  | 0.77455  | -2.88837 | -0.97470 |
| C  | -0.46697 | -2.95178 | -0.30656 |
| C  | -1.52547 | -2.05335 | -0.62897 |
| C  | -1.32155 | -1.05983 | -1.61379 |
| C  | -0.07273 | -0.97634 | -2.29789 |
| C  | 0.96649  | -1.87272 | -1.96012 |

## XYZ Coordinates and Computed Energies

```

H -2.44682 -1.98416 -0.05009
C 2.02407 1.50530 -0.40042
C 2.98241 2.26670 -1.07115
C 4.18724 1.68678 -1.45476
C 4.44678 0.34697 -1.16394
C 3.49195 -0.41401 -0.49870
C 2.25712 0.13673 -0.12211
H 1.94780 -1.74499 -2.40510
O -0.04485 -1.10832 1.91941
C 0.85411 -0.79859 2.76693
O 1.97747 -0.33799 2.45374
C 0.52451 -1.01121 4.21910
H 0.62500 -0.06140 4.75064
H -0.48612 -1.40035 4.33750
H 1.24927 -1.70478 4.65388
H 2.78256 3.30555 -1.31873
H 4.92850 2.28250 -1.97932
H 3.71235 -1.44629 -0.23666
H 5.39756 -0.09573 -1.44714
H 1.20697 4.12524 0.07358
H 1.93615 -0.24471 1.04842
H 1.59099 -3.54320 -0.69230
H 0.10912 -0.17907 -3.01016
H -0.58298 -3.62850 0.53421
H -2.11308 -0.29110 -1.72842
H -2.81325 2.99767 1.13473
H -1.08569 4.79203 0.79290
H -2.19792 0.62127 0.72938
O -3.80612 -0.43818 0.37532
C -4.25302 0.29116 -0.55668
C -5.75844 0.55942 -0.54790
H -6.28492 -0.35066 -0.85615
H -6.09665 0.79394 0.46542
H -6.02211 1.36621 -1.23472
O -3.57882 0.80381 -1.48744

```

**C.OAc**

```

SCF (PBE1PBE) Energy = -1262.16835417
Enthalpy 0K = -1261.788226
Enthalpy 298K = -1261.760991
Free Energy 298K = -1261.848377
Lowest Frequency = 13.1943 cm-1
Second Frequency = 22.6385 cm-1

```

```

C -1.42528 1.55217 0.31532
N -0.21008 1.12149 -0.05382
C 0.76913 2.00167 -0.38870
C 0.51635 3.37027 -0.37119
C -0.74567 3.82851 -0.00881
C -1.72455 2.91088 0.34358
Ru 0.24163 -0.90602 -0.14761
C 0.49976 -3.05958 -0.62166
C -0.64449 -2.91760 0.20943
C -1.73159 -2.08072 -0.14396
C -1.62770 -1.28614 -1.30593
C -0.47553 -1.37998 -2.14321
C 0.57800 -2.26846 -1.79878
H -2.57882 -1.89030 0.51276
C 2.04739 1.36452 -0.70827
C 3.19079 2.06615 -1.10161
C 4.37994 1.38679 -1.33873
C 4.42894 0.00470 -1.17072
C 3.28555 -0.69689 -0.78588
C 2.06069 -0.04693 -0.55702
H 1.48067 -2.28941 -2.40110
O 0.42755 -0.75569 1.99655
C 1.32315 -0.35131 2.74100
O 2.49335 0.06114 2.32185
C 1.14377 -0.29778 4.22226
H 1.21252 0.74210 4.55452

```

## PBE1PBE Optimised Geometries and Energies

```

H 0.17364 -0.70978 4.49435
H 1.94903 -0.85077 4.71287
H 3.16044 3.14543 -1.22592
H 5.26673 1.93388 -1.64411
H 3.35157 -1.77570 -0.65722
H 5.35938 -0.53065 -1.34168
H 1.30215 4.06860 -0.63658
H 2.51383 0.00353 1.33418
H 1.32026 -3.70576 -0.33135
H -0.37960 -0.73875 -3.01245
H -0.65436 -3.42117 1.17201
H -2.41673 -0.53021 -1.48070
H -2.72684 3.21540 0.62163
H -0.95627 4.89411 -0.00341
H -2.18334 0.79985 0.57522
O -3.82867 -0.18304 0.80615
C -4.42346 0.31885 -0.19258
C -5.92453 0.56879 -0.03379
H -6.45390 -0.38868 -0.09579
H -6.13962 0.98887 0.95280
H -6.30186 1.22613 -0.81986
O -3.90022 0.61512 -1.29616

```

**A.a-H**

```

SCF (PBE1PBE) Energy = -1262.19873619
Enthalpy 0K = -1261.818124
Enthalpy 298K = -1261.790685
Free Energy 298K = -1261.880574
Lowest Frequency = 12.3166 cm-1
Second Frequency = 17.5785 cm-1

```

```

C 1.96546 1.45649 -1.98695
C 0.59445 1.07568 -1.86740
C 0.22331 -0.28117 -1.93531
C -1.90710 -1.64216 0.72649
C -1.74713 -3.02459 0.74118
H -0.82650 -3.44138 1.13882
C -2.22224 1.30803 0.39502
H -1.22974 0.95296 0.65093
O 1.39881 1.07683 1.20932
C 0.95385 2.89320 2.62293
H 1.81999 2.61332 3.22733
H 0.84901 3.97804 2.59201
H 0.06965 2.45708 3.09883
C 1.09088 2.34179 1.21718
O 0.89479 3.04928 0.23130
O 3.40106 -0.65117 0.83238
C 2.62417 -1.41594 1.48291
O 1.44971 -1.57988 1.02601
H -1.10310 -1.03120 1.12448
C 3.06130 -2.06814 2.75253
H 2.81103 -1.40226 3.58458
H 2.53388 -3.01225 2.89778
H 4.14103 -2.22444 2.74853
C -2.75484 -3.85402 0.25591
H -2.63033 -4.93336 0.26999
C -3.07833 -1.06306 0.21790
C -4.08799 -1.90885 -0.26133
H -4.99560 -1.45473 -0.64466
C -3.92746 -3.28876 -0.24252
H -4.72167 -3.92714 -0.62000
N -4.50010 0.83689 -0.17042
C -2.45589 2.67377 0.28648
H -1.63619 3.37021 0.44246
C -3.27133 0.40857 0.15716
C -3.73390 3.11108 -0.04543
H -3.96691 4.16668 -0.14193
C -4.71424 2.14620 -0.26020
H -5.72858 2.44402 -0.52355
Ru 1.79870 -0.06348 -0.43756

```

## XYZ Coordinates and Computed Energies

C 1.22644 -1.28249 -2.13549  
H 0.95286 -2.33048 -2.07451  
C 2.58075 -0.91783 -2.28684  
H 3.34753 -1.68131 -2.35351  
C 2.94768 0.45975 -2.18296  
H 3.99837 0.73008 -2.15733  
H -0.80015 -0.57700 -1.73028  
H -0.13231 1.82728 -1.58738  
H 2.24367 2.48499 -1.79686

**B**

SCF (PBE1PBE) Energy = -1262.19334428  
Enthalpy 0K = -1261.812037  
Enthalpy 298K = -1261.785142  
Free Energy 298K = -1261.869723  
Lowest Frequency = 28.3654 cm<sup>-1</sup>  
Second Frequency = 36.0027 cm<sup>-1</sup>

C -0.67718 -2.08210 1.95656  
Ru -0.64831 -0.36432 -0.45674  
C -1.05432 0.03898 -2.58341  
C -1.94798 -0.94896 -2.09591  
C -0.07262 -2.29197 -1.28159  
C 0.84673 -1.33294 -1.77284  
H -1.44437 0.96843 -2.97832  
H -3.00968 -0.73171 -2.11592  
H 0.27213 -3.11821 -0.67152  
H 1.90858 -1.43934 -1.58615  
C -0.55173 -2.15212 3.46805  
H -0.67792 -3.18030 3.80933  
H 0.40884 -1.75425 3.80624  
H -1.33505 -1.52931 3.91154  
O -0.22613 -0.96049 1.47290  
O -1.16876 -3.00942 1.32025  
C 1.58731 1.67672 0.47668  
C -0.55180 2.54032 0.26449  
N 0.27884 1.48344 0.19198  
O -2.31262 0.25609 0.61331  
C -3.32462 0.89016 0.11117  
O -3.36538 1.42417 -1.00065  
C -4.50940 0.94946 1.05648  
H -4.19548 1.33792 2.02903  
H -5.29770 1.57528 0.63696  
H -4.89099 -0.06206 1.22503  
C 2.60160 0.60881 0.26577  
C 3.58147 0.82592 -0.71088  
C 2.65800 -0.55045 1.04462  
C 4.57960 -0.11897 -0.93541  
H 3.55249 1.73671 -1.30431  
C 3.66579 -1.48530 0.82666  
H 1.88517 -0.72273 1.78470  
C 4.62275 -1.27863 -0.16555  
H 5.32486 0.05509 -1.70622  
H 3.70130 -2.38342 1.43681  
H 5.40338 -2.01517 -0.33328  
C -0.14478 3.80279 0.66959  
C 2.05373 2.92468 0.90081  
C 1.18410 3.99851 1.01641  
H 3.10733 3.02664 1.13705  
H 1.54192 4.96718 1.35262  
H -0.87109 4.60745 0.70232  
H -1.56990 2.36312 -0.05936  
C -1.47297 -2.12326 -1.45657  
H -2.15156 -2.81341 -0.97318  
C 0.33743 -0.15331 -2.38194  
H 1.02809 0.64523 -2.63634

**TS (B-C)**

SCF (PBE1PBE) Energy = -1262.14151667  
Enthalpy 0K = -1261.763085

## PBE1PBE Optimised Geometries and Energies

Enthalpy 298K = -1261.736786  
Free Energy 298K = -1261.819954  
Lowest Frequency = -36.3555 cm<sup>-1</sup>  
Second Frequency = 32.1050 cm<sup>-1</sup>

C -3.36812 0.13857 -1.29528  
Ru -0.03097 -0.42175 0.67549  
C 0.38797 -1.66413 2.38681  
C -0.84312 -2.08628 1.82216  
C -1.69796 0.19625 1.96352  
C -0.48824 0.63226 2.57831  
H 1.21087 -2.36629 2.44959  
H -0.90825 -3.09499 1.43239  
H -2.46052 0.88908 1.61738  
H -0.32867 1.68531 2.78015  
C -4.48405 -0.51921 -2.10813  
H -4.44215 -1.60464 -1.95825  
H -5.46523 -0.16963 -1.77940  
H -4.34736 -0.33090 -3.17554  
O -2.23585 0.19438 -1.84233  
O -3.66682 0.54463 -0.13672  
C 2.13037 1.19162 -0.59804  
C 4.08920 -0.74230 -0.67092  
C 2.83992 -0.97832 -0.11860  
H 2.54501 -1.95259 0.26030  
N 1.89555 -0.02635 -0.06563  
O -0.03021 -1.54917 -1.02922  
C 0.37367 -2.78127 -1.06605  
O 0.88077 -3.40444 -0.12866  
C 0.19180 -3.40679 -2.43222  
H 0.97531 -3.03578 -3.10099  
H 0.27154 -4.49212 -2.36099  
H -0.76766 -3.10987 -2.86029  
H 4.82507 -1.53837 -0.68817  
C 1.02629 2.14862 -0.50022  
C 1.28337 3.51644 -0.35330  
C -0.30129 1.67552 -0.44820  
C 0.23895 4.41099 -0.15470  
H 2.30835 3.87699 -0.35534  
C -1.34339 2.59029 -0.24808  
H -0.74459 0.71544 -0.92452  
C -1.07458 3.94557 -0.09440  
H 0.45186 5.46977 -0.03755  
H -2.35989 2.19061 -0.24277  
H -1.89225 4.64485 0.05640  
C 3.36490 1.48120 -1.18479  
C 4.35531 0.51206 -1.21266  
H 5.31704 0.72516 -1.66955  
H 3.52209 2.45445 -1.63586  
C -1.89428 -1.15629 1.61000  
H -2.79017 -1.40245 1.05159  
C 0.55773 -0.29514 2.76621  
H 1.52359 0.04625 3.12613

**C**

SCF (PBE1PBE) Energy = -1262.21517174  
Enthalpy 0K = -1261.834278  
Enthalpy 298K = -1261.807264  
Free Energy 298K = -1261.892398  
Lowest Frequency = 26.4011 cm<sup>-1</sup>  
Second Frequency = 31.9636 cm<sup>-1</sup>

C 3.82114 0.17498 0.82572  
Ru -0.24727 -0.64957 -0.66598  
C -1.14500 -2.52307 -1.64003  
C 0.03115 -2.92045 -1.00592  
C 1.27924 -1.12822 -2.17414  
C 0.06642 -0.71206 -2.80569  
H -2.08100 -3.02194 -1.40918  
H 0.00796 -3.69701 -0.25165

## XYZ Coordinates and Computed Energies

```

H 2.20628 -0.58726 -2.31620
H 0.05996 0.15902 -3.45178
C 5.14394 0.79161 1.19807
H 5.91158 0.48235 0.48979
H 5.05123 1.88177 1.19360
H 5.42365 0.49704 2.21303
O 2.88115 0.45281 1.71157
O 3.65365 -0.49095 -0.18164
C -4.13584 -0.21747 1.22846
C -2.96764 -0.71701 0.67653
H -2.75541 -1.77829 0.64328
N -2.00304 0.07922 0.19360
O 0.52155 -0.59043 1.29460
C 0.08278 -1.45527 2.17446
O -0.74181 -2.33279 1.94452
C 0.66366 -1.25927 3.55992
H 0.17455 -0.39902 4.02869
H 0.47886 -2.14509 4.16809
H 1.73291 -1.03899 3.51738
H -4.88973 -0.90139 1.60163
C -0.96784 2.16025 -0.20055
C -0.87456 3.55805 -0.18981
C 0.10141 1.34958 -0.64741
C 0.29088 4.17826 -0.61326
H -1.70823 4.16618 0.15277
C 1.27635 2.00505 -1.03905
H 1.99241 0.05709 1.45513
C 1.36905 3.39501 -1.02768
H 0.36655 5.26151 -0.60919
H 2.14529 1.42337 -1.33380
H 2.29394 3.87357 -1.34150
C -2.12809 1.42709 0.28424
C -4.29691 1.16457 1.30165
C -3.28451 1.98736 0.83831
H -5.19789 1.59435 1.72970
H -3.37603 3.06520 0.90806
C 1.23458 -2.17379 -1.23336
H 2.12656 -2.37185 -0.65009
C -1.14419 -1.38119 -2.51058
H -2.07483 -1.02712 -2.94122

```

**B'**

```

SCF (PBE1PBE) Energy = -1030.21745469
Enthalpy 0K = -1029.939789
Enthalpy 298K = -1029.918745
Free Energy 298K = -1029.989243
Lowest Frequency = 37.0192 cm-1
Second Frequency = 59.0084 cm-1

```

```

C -2.68783 -0.42992 -1.02842
Ru -0.38090 -0.34290 -0.12104
C -4.06055 -0.63226 -1.59111
H -4.80833 -0.19158 -0.92985
H -4.12939 -0.20593 -2.59327
H -4.25612 -1.70718 -1.66175
O -1.67558 -0.36237 -1.80223
O -2.49510 -0.35340 0.22060
C 1.93434 0.92417 -0.27167
C 2.43506 -1.11159 -1.29279
N 1.54918 -0.28207 -0.73782
O -0.42433 -2.42188 0.22963
C 0.05800 -2.24337 1.39377
O 0.36563 -1.05833 1.73369
C 0.21745 -3.38688 2.34393
H 0.41409 -4.31036 1.79668
H 1.01769 -3.18047 3.05622
H -0.71686 -3.51233 2.90087
C 0.72088 1.59707 0.25499
C 0.67169 2.17657 1.55708
C -0.34667 1.84052 -0.66782

```

## PBE1PBE Optimised Geometries and Energies

```

C -0.42532 2.89746 1.94787
H 1.50188 2.01055 2.23693
C -1.45265 2.62168 -0.22251
H -0.18776 1.72255 -1.73649
C -1.50512 3.11265 1.05569
H -0.46740 3.31414 2.95006
H -2.24837 2.84308 -0.92812
H -2.36139 3.69540 1.38151
C 3.77639 -0.75254 -1.39010
C 3.25431 1.33926 -0.31508
C 4.19123 0.47715 -0.88824
H 3.53516 2.30948 0.08085
H 5.23604 0.76677 -0.94568
H 4.48280 -1.43840 -1.84523
H 2.05132 -2.06556 -1.63916

```

**TS (B' -C')**

```

SCF (PBE1PBE) Energy = -1030.18248425
Enthalpy 0K = -1029.905652
Enthalpy 298K = -1029.885038
Free Energy 298K = -1029.955070
Lowest Frequency = -65.8309 cm-1
Second Frequency = 39.8148 cm-1

```

```

C -2.91933 0.95020 -0.57922
Ru -0.44856 -0.27916 0.05281
C -4.38594 1.27701 -0.39126
H -4.69191 2.05767 -1.08925
H -4.97734 0.37847 -0.59627
H -4.58950 1.57900 0.63856
O -2.33469 1.22646 -1.63480
O -2.36632 0.36172 0.42856
C 2.36783 0.11615 -0.16830
C 3.26870 -2.41878 -0.67533
C 1.91680 -2.13192 -0.55195
H 1.15029 -2.89082 -0.66516
N 1.47312 -0.89366 -0.29006
O -1.29033 -2.04904 -0.59407
C -1.36922 -2.45817 0.61012
O -0.83305 -1.70624 1.48353
C -2.06949 -3.72225 0.97244
H -1.62166 -4.15998 1.86617
H -3.11612 -3.48787 1.19160
H -2.04092 -4.42498 0.13812
H 3.58312 -3.43507 -0.88673
C 1.72541 1.41764 0.07090
C 2.27769 2.38301 0.92064
C 0.48212 1.68237 -0.56204
C 1.61923 3.58695 1.13132
H 3.20978 2.17152 1.43704
C -0.16494 2.90923 -0.34727
H 0.12581 1.07234 -1.43130
C 0.39684 3.84809 0.50497
H 2.05258 4.32455 1.80049
H -1.10460 3.07970 -0.86165
H -0.11280 4.78984 0.68472
C 3.73694 -0.10242 -0.27450
C 4.19586 -1.39110 -0.52554
H 5.25947 -1.58775 -0.61636
H 4.42295 0.73258 -0.17888

```

**C'**

```

SCF (PBE1PBE) Energy = -1030.18243994
Enthalpy 0K = -1029.904858
Enthalpy 298K = -1029.883087
Free Energy 298K = -1029.957335
Lowest Frequency = 21.1932 cm-1
Second Frequency = 29.4385 cm-1

```

```

C 2.10518 1.59034 1.75897

```

## XYZ Coordinates and Computed Energies

## PBE1PBE Optimised Geometries and Energies

Ru -0.13355 -1.41161 -0.72033  
 C 1.90743 3.04620 2.07158  
 H 2.86341 3.56656 2.02610  
 H 1.23003 3.46909 1.32228  
 H 1.44200 3.17483 3.05125  
 O 1.04761 0.85720 2.10473  
 O 3.10045 1.13451 1.23294  
 C -3.88758 -1.09561 1.39617  
 C -2.71645 -1.57031 0.82850  
 H -2.42163 -2.61140 0.92363  
 N -1.87288 -0.78958 0.13585  
 O 1.17183 -1.56302 0.83285  
 C 2.17243 -1.87302 0.06269  
 O 1.91876 -1.98661 -1.16136  
 C 3.52786 -2.03832 0.64941  
 H 3.47698 -2.66274 1.54485  
 H 4.20813 -2.47036 -0.08422  
 H 3.87055 -1.04121 0.94883  
 H -4.53265 -1.77063 1.94729  
 C -1.14289 1.26507 -0.76258  
 C -1.21031 2.62675 -1.07456  
 C -0.02165 0.48301 -1.14694  
 C -0.16540 3.23321 -1.76077  
 H -2.07562 3.21912 -0.78615  
 C 1.02190 1.11878 -1.83551  
 H 1.17091 -0.05250 1.74944  
 C 0.94749 2.47634 -2.13766  
 H -0.21637 4.28999 -2.00557  
 H 1.89574 0.54358 -2.12897  
 H 1.76577 2.95256 -2.67224  
 C -2.16287 0.53569 -0.01955  
 C -4.20064 0.25265 1.23754  
 C -3.33140 1.06740 0.52762  
 H -5.10952 0.66363 1.66640  
 H -3.54886 2.12174 0.39774

**C'** (without HOAc)

SCF (PBE1PBE) Energy = -801.326920706  
 Enthalpy 0K = -801.113664  
 Enthalpy 298K = -801.097786  
 Free Energy 298K = -801.157419  
 Lowest Frequency = 39.2484 cm<sup>-1</sup>  
 Second Frequency = 45.1589 cm<sup>-1</sup>

Ru 0.71454 -0.63516 -0.64410  
 C -3.11365 -2.44951 0.20967  
 C -1.78667 -2.24044 -0.12960  
 H -1.12801 -3.06757 -0.37820  
 N -1.22624 -1.02167 -0.16939  
 O 1.74162 -1.15289 1.02606  
 C 2.86691 -0.76734 0.53941  
 O 2.86609 -0.31500 -0.63814  
 C 4.10196 -0.83105 1.37706  
 H 4.05089 -1.67495 2.06714  
 H 4.98435 -0.90267 0.73989  
 H 4.17359 0.08755 1.96879  
 H -3.51400 -3.45702 0.22673  
 C -1.23692 1.32262 0.09007  
 C -1.78640 2.58624 0.32989  
 C 0.14009 1.17270 -0.22516  
 C -0.98070 3.71579 0.26991  
 H -2.84343 2.69581 0.56148  
 C 0.93323 2.32927 -0.27549  
 C 0.37692 3.58253 -0.03266  
 H -1.40584 4.69749 0.45598  
 H 1.99024 2.23816 -0.51241  
 H 1.00578 4.46850 -0.08092  
 C -1.98339 0.07165 0.14354  
 C -3.89962 -1.34248 0.52198  
 C -3.32704 -0.07951 0.48901

H -4.94428 -1.46369 0.79202  
 H -3.91522 0.79734 0.73637

**D<sup>+</sup>** (K<sup>1</sup>)

SCF (PBE1PBE) Energy = -1280.55114205  
 Enthalpy 0K = -1280.152928  
 Enthalpy 298K = -1280.126955  
 Free Energy 298K = -1280.208958  
 Lowest Frequency = 28.1803 cm<sup>-1</sup>  
 Second Frequency = 37.5341 cm<sup>-1</sup>

Ru 0.11441 -0.09757 -0.20753  
 O 0.19926 -1.70697 2.29433  
 C -0.57359 -0.76643 2.44895  
 C -1.37697 -0.57497 3.70843  
 O -0.80989 0.15249 1.54086  
 H -2.35708 -1.04278 3.57027  
 H -0.87340 -1.06586 4.54155  
 H -1.53796 0.48288 3.92323  
 C -2.85494 -0.24078 -0.56297  
 C -4.12102 -0.52754 -0.05084  
 C -1.90541 -1.27539 -0.63723  
 C -4.43013 -1.81799 0.36970  
 H -4.85714 0.26266 0.06067  
 C -2.21470 -2.56515 -0.21565  
 C -3.48156 -2.83600 0.29393  
 H -5.41708 -2.02747 0.77043  
 H -1.47430 -3.35458 -0.29017  
 H -3.72984 -3.83869 0.62670  
 H -0.99665 -1.16966 -1.30193  
 C -2.45062 1.11326 -0.95417  
 C -2.87852 3.32696 -1.80230  
 H -3.56761 4.08205 -2.16679  
 C -3.34539 2.08064 -1.41436  
 H -4.39891 1.83616 -1.48981  
 C -0.67068 2.58901 -1.27126  
 H 0.40111 2.73978 -1.20126  
 C -1.51148 3.58500 -1.73625  
 H -1.09695 4.53895 -2.04205  
 N -1.12217 1.38460 -0.87936  
 C 2.89272 -0.66897 -0.53416  
 C 3.90131 -1.00625 -1.43777  
 C 1.79526 -1.55002 -0.34886  
 C 3.84137 -2.21185 -2.13015  
 H 4.72346 -0.31977 -1.61791  
 C 1.76488 -2.77071 -1.03592  
 C 2.77765 -3.09314 -1.93192  
 H 4.63026 -2.46659 -2.83096  
 H 0.95901 -3.47216 -0.84295  
 H 2.74796 -4.03629 -2.46829  
 H 1.15844 -1.49381 0.61257  
 C 2.87741 0.58856 0.22427  
 C 3.84015 2.42741 1.42750  
 H 4.70716 2.97882 1.77719  
 C 4.00367 1.28745 0.65074  
 H 4.99185 0.91807 0.39982  
 C 1.47096 2.10863 1.31104  
 H 0.44495 2.36279 1.55391  
 C 2.55476 2.83822 1.77379  
 H 2.38863 3.70787 2.39958  
 N 1.63283 1.02494 0.53631

**TS (D<sup>+</sup>-E<sup>+</sup>)** (K<sup>1</sup>)

SCF (PBE1PBE) Energy = -1280.54433543  
 Enthalpy 0K = -1280.150367  
 Enthalpy 298K = -1280.124898  
 Free Energy 298K = -1280.205195  
 Lowest Frequency = -1053.6222 cm<sup>-1</sup>  
 Second Frequency = 33.9850 cm<sup>-1</sup>



## XYZ Coordinates and Computed Energies

```

Ru  0.08581 -0.01202 -0.29579
O   0.80468 -1.76605  1.93319
C  -0.10796 -0.99900  2.32661
C  -0.65073 -1.12895  3.71453
O  -0.63147 -0.09505  1.58011
H   0.17134 -1.27303  4.41799
H  -1.24732 -0.25913  3.98777
H  -1.28103 -2.02267  3.75647
C  -2.91323 -0.38006 -0.40712
C  -4.09306 -0.81454  0.19940
C  -1.89505 -1.31895 -0.65395
C  -4.25720 -2.15375  0.54117
H  -4.87449 -0.10064  0.44147
C  -2.06315 -2.65936 -0.31635
C  -3.24588 -3.07751  0.28755
H  -5.17898 -2.47602  1.01550
H  -1.28063 -3.37788 -0.53621
H  -3.38136 -4.12164  0.55110
H  -1.05882 -1.08706 -1.37637
C  -2.67748  1.03251 -0.73324
C  -3.39789  3.22952 -1.40320
H  -4.18695  3.92511 -1.67080
C  -3.70297  1.91920 -1.06601
H  -4.72813  1.56680 -1.08697
C  -1.09333  2.70260 -1.07263
H  -0.04048  2.96656 -1.06828
C  -2.06428  3.62939 -1.41411
H  -1.77539  4.63844 -1.68597
N  -1.38370  1.43713 -0.72804
C   2.88713 -0.49582 -0.63328
C   3.99068 -0.90576 -1.38290
C   1.71676 -1.30422 -0.55097
C   3.96672 -2.13343 -2.03554
H   4.86291 -0.26506 -1.47736
C   1.73853 -2.54848 -1.20255
C   2.84380 -2.95553 -1.94316
H   4.82617 -2.45140 -2.61733
H   0.88524 -3.21535 -1.11427
H   2.83500 -3.91796 -2.44595
H   1.08000 -1.40413  0.68296
C   2.83506  0.77211  0.09687
C   3.73175  2.66508  1.27696
H   4.57947  3.25518  1.61059
C   3.93274  1.52668  0.50928
H   4.93422  1.20121  0.25151
C   1.38014  2.24801  1.18646
H   0.34818  2.47034  1.43610
C   2.43432  3.02633  1.63539
H   2.23754  3.89296  2.25632
N   1.57512  1.16526  0.41729

```

**E<sup>+</sup>** (K<sup>1</sup>)

```

SCF (PBE1PBE) Energy = -1280.55257042
Enthalpy 0K = -1280.153782
Enthalpy 298K = -1280.127886
Free Energy 298K = -1280.209444
Lowest Frequency = 32.3578 cm-1
Second Frequency = 35.4663 cm-1

```

```

Ru  0.10618  0.02275 -0.34645
O   0.82011 -1.81557  2.00078
C  -0.11480 -0.99191  2.34835
C  -0.63589 -1.11843  3.73527
O  -0.57786 -0.12889  1.56876
H  -1.13077 -2.08876  3.83949
H   0.19600 -1.10038  4.44371
H  -1.34238 -0.31894  3.95136
C  -2.90880 -0.46670 -0.38507
C  -4.04815 -0.97343  0.24368

```

## PBE1PBE Optimised Geometries and Energies

```

C  -1.85029 -1.34724 -0.67699
C  -4.13702 -2.32489  0.56429
H  -4.85840 -0.30391  0.51643
C  -1.94576 -2.70143 -0.36304
C  -3.08827 -3.19110  0.26449
H  -5.02897 -2.70184  1.05519
H  -1.13717 -3.37698 -0.62154
H  -3.16426 -4.24625  0.50763
H  -1.04575 -1.06019 -1.41516
C  -2.76378  0.96450 -0.69125
C  -3.63321  3.11706 -1.32307
H  -4.46747  3.76328 -1.57722
C  -3.84971  1.78390 -1.00589
H  -4.84947  1.36465 -1.03036
C  -1.29802  2.73452 -1.01030
H  -0.26450  3.06804 -1.00968
C  -2.32893  3.60337 -1.33188
H  -2.10848  4.63369 -1.58805
N  -1.50001  1.44851 -0.68465
C   2.93158 -0.43872 -0.64043
C   4.09852 -0.91726 -1.24030
C   1.71422 -1.18280 -0.66985
C   4.09632 -2.16090 -1.86113
H   5.00823 -0.32300 -1.24110
C   1.76179 -2.43977 -1.29948
C   2.92896 -2.92263 -1.88774
H   5.00277 -2.53576 -2.32587
H   0.86889 -3.05940 -1.33896
H   2.92917 -3.89508 -2.37194
H   1.06934 -1.59462  1.04002
C   2.85494  0.84188  0.06096
C   3.70656  2.78193  1.20532
H   4.54129  3.39572  1.52902
C   3.93289  1.63020  0.46630
H   4.94299  1.32389  0.21953
C   1.36616  2.32100  1.10124
H   0.32818  2.53715  1.33177
C   2.39996  3.12914  1.54391
H   2.18077  4.00790  2.13972
N   1.58351  1.22060  0.36309

```

**D<sup>+</sup>** (K<sup>2</sup>)

```

SCF (PBE1PBE) Energy = -1280.57375894
Enthalpy 0K = -1280.174445
Enthalpy 298K = -1280.148658
Free Energy 298K = -1280.229621
Lowest Frequency = 25.1148 cm-1
Second Frequency = 41.9699 cm-1

```

```

Ru  0.27532  0.70843  0.02432
O   1.12183  2.26500  1.18904
C   1.14744  3.04874  0.18270
C   1.63197  4.45388  0.31008
O   0.71796  2.58668 -0.92344
H   2.07215  4.79103 -0.62960
H   0.78038  5.10429  0.53632
H   2.34780  4.53714  1.12890
C  -2.45746 -0.07281  0.86837
C  -3.79869 -0.36927  0.62025
C  -1.90444  1.09731  0.30516
C  -4.57273  0.49441 -0.15082
H  -4.23945 -1.28396  1.00526
C  -2.68607  1.96978 -0.45657
C  -4.02331  1.66095 -0.68762
H  -5.61504  0.25461 -0.33715
H  -2.24062  2.87329 -0.86104
H  -4.64033  2.32885 -1.28056
H  -1.02004  1.57923  0.86370
C  -1.55594 -0.91579  1.65868
C  -1.05875 -2.48434  3.41420

```

## XYZ Coordinates and Computed Energies

```

H -1.38385 -3.17780 4.18309
C -1.98903 -1.81320 2.63487
H -3.05163 -1.95086 2.80098
C 0.66455 -1.33356 2.22071
H 1.70431 -1.09415 2.03041
C 0.29433 -2.22497 3.21458
H 1.05802 -2.69815 3.82170
N -0.22927 -0.70930 1.43801
C 1.96241 -1.11227 -0.98554
C 2.67080 -2.09152 -0.27266
C 2.42347 0.22507 -0.99154
C 3.79208 -1.73571 0.46120
H 2.32521 -3.12102 -0.28789
C 3.54223 0.56779 -0.20676
C 4.21236 -0.39959 0.52224
H 4.34325 -2.49828 1.00402
H 3.90335 1.59136 -0.21544
H 5.08324 -0.13228 1.11216
H 2.06880 0.92571 -1.74388
C 0.75401 -1.44008 -1.76789
C -0.53180 -2.62462 -3.39854
H -0.63455 -3.41126 -4.13924
C 0.65961 -2.46668 -2.69763
H 1.51584 -3.10760 -2.87935
C -1.41930 -0.75309 -2.18844
H -2.21420 -0.05334 -1.96067
C -1.57903 -1.74554 -3.14676
H -2.51832 -1.82012 -3.68343
N -0.27772 -0.60933 -1.50040

```

TS ( $D^+-E^+$ ) ( $K^2$ )

```

SCF (PBE1PBE) Energy = -1280.54432862
Enthalpy 0K = -1280.150194
Enthalpy 298K = -1280.124542
Free Energy 298K = -1280.205364
Lowest Frequency = -1174.0832 cm-1
Second Frequency = 20.9745 cm-1

```

```

Ru 0.01228 0.65025 -0.01468
O 0.84839 2.38970 -1.23491
C 0.53466 3.19441 -0.24107
C 0.67502 4.65771 -0.45525
O 0.12470 2.67937 0.81765
H 0.37975 5.20563 0.43863
H 1.71227 4.88697 -0.71671
H 0.05828 4.96165 -1.30628
C 2.47033 -0.81722 -0.57496
C 3.76257 -1.31044 -0.38854
C 2.04781 0.35778 0.09847
C 4.65046 -0.64042 0.44800
H 4.08348 -2.22545 -0.87785
C 2.96051 1.01345 0.93985
C 4.25287 0.52022 1.10989
H 5.65471 -1.02825 0.58725
H 2.65305 1.91252 1.46813
H 4.94921 1.03862 1.76251
H 1.47619 1.42569 -0.72315
C 1.46091 -1.45848 -1.41631
C 0.68372 -2.97652 -3.11760
H 0.87168 -3.77448 -3.82883
C 1.71015 -2.48886 -2.32351
H 2.71338 -2.88828 -2.41789
C -0.77544 -1.39563 -2.07781
H -1.74232 -0.92203 -1.95200
C -0.58274 -2.41094 -3.00031
H -1.41291 -2.74314 -3.61346
N 0.20964 -0.93456 -1.29074
C -2.60955 -0.27174 0.64721
C -3.54147 -0.99959 -0.10416
C -2.49413 1.11826 0.44944

```

## PBE1PBE Optimised Geometries and Energies

```

C -4.30779 -0.36040 -1.07136
H -3.64073 -2.06971 0.05459
C -3.25315 1.74365 -0.54833
C -4.14699 1.00651 -1.31481
H -5.02913 -0.93092 -1.64897
H -3.17078 2.81742 -0.68779
H -4.74251 1.49532 -2.07937
H -1.94228 1.72834 1.16108
C -1.73510 -0.93570 1.63375
C -1.27746 -2.37780 3.49444
H -1.60968 -3.06732 4.26386
C -2.18833 -1.82392 2.60261
H -3.24738 -2.05188 2.66018
C 0.45334 -1.13701 2.39505
H 1.48623 -0.83598 2.26997
C 0.06251 -2.02006 3.39050
H 0.80819 -2.41794 4.06977
N -0.42536 -0.60887 1.52634

```

 $E^+$  ( $K^2$ )

```

SCF (PBE1PBE) Energy = -1280.56389991
Enthalpy 0K = -1280.164202
Enthalpy 298K = -1280.137813
Free Energy 298K = -1280.221142
Lowest Frequency = 28.6330 cm-1
Second Frequency = 34.1189 cm-1

```

```

Ru -0.21497 -0.30151 -0.48150
O -2.40275 -2.22764 -2.08665
C -1.41789 -2.91197 -1.54504
C -1.38958 -4.35067 -1.92306
O -0.58256 -2.40250 -0.78799
H -0.51905 -4.83775 -1.48762
H -2.30628 -4.83668 -1.57615
H -1.37260 -4.44242 -3.01286
C -2.25016 1.65678 0.08929
C -3.50266 2.19885 0.38748
C -2.04181 0.25245 0.06852
C -4.57353 1.36515 0.69130
H -3.65378 3.27467 0.39517
C -3.13499 -0.55983 0.41740
C -4.38529 -0.01361 0.71682
H -5.54508 1.79038 0.92109
H -3.01570 -1.64055 0.48287
H -5.21187 -0.66988 0.97511
H -2.45330 -1.34185 -1.67219
C -1.05956 2.46319 -0.17693
C 0.17841 4.50881 -0.47652
H 0.21541 5.59325 -0.50733
C -1.01728 3.85672 -0.21485
H -1.92347 4.42592 -0.04382
C 1.22369 2.37024 -0.65772
H 2.08566 1.74060 -0.84025
C 1.32270 3.75129 -0.70555
H 2.27894 4.21357 -0.92236
N 0.07113 1.73174 -0.39384
C 2.70866 -0.50553 0.34308
C 3.88993 0.22933 0.49954
C 2.33490 -0.91919 -0.94563
C 4.67151 0.54801 -0.60668
H 4.17992 0.58348 1.48439
C 3.11615 -0.58989 -2.05279
C 4.28544 0.14653 -1.88560
H 5.58345 1.12146 -0.47077
H 2.81952 -0.92879 -3.04083
H 4.89967 0.39836 -2.74439
H 1.49641 -1.61176 -1.07599
C 1.85534 -0.80968 1.50626
C 1.57074 -1.42978 3.81856
H 1.98854 -1.69609 4.78403

```

## XYZ Coordinates and Computed Energies

```
C 2.40125 -1.14302 2.74549
H 3.47975 -1.20014 2.84339
C -0.29551 -1.04494 2.37237
H -1.35781 -0.97852 2.17823
C 0.19509 -1.38074 3.62282
H -0.50229 -1.59730 4.42434
N 0.50914 -0.75796 1.33067
```

**D<sup>+</sup>** ( $\eta^6$ ) (\* single point)

```
SCF (PBE1PBE) Energy = -1280.57851221
Enthalpy 0K = -1280.181870
Enthalpy 298K = -1280.157430
Free Energy 298K = -1280.232828
Lowest Frequency = 46.1586 cm-1
Second Frequency = 57.7623 cm-1
```

**TS (D<sup>+</sup>-E<sup>+</sup>)** ( $\eta^6$ )

```
SCF (PBE1PBE) Energy = -1280.56094936
Enthalpy 0K = -1280.162167
Enthalpy 298K = -1280.136657
Free Energy 298K = -1280.218720
Lowest Frequency = -98.7464 cm-1
Second Frequency = 16.3866 cm-1
```

```
Ru 0.41886 -0.76436 -0.27009
O 0.32607 -1.84791 1.48533
C 1.46657 -2.43497 1.70120
C 1.53207 -3.28533 2.93994
O 2.43463 -2.27605 0.94856
H 1.74488 -2.64140 3.79953
H 0.57993 -3.78525 3.12590
H 2.33862 -4.01305 2.84810
C 1.86314 1.88254 0.21347
C 2.28159 2.99008 -0.52724
C 2.57986 0.67740 0.11806
C 3.39574 2.88815 -1.35703
H 1.72739 3.92306 -0.47348
C 3.69924 0.58317 -0.70995
C 4.10568 1.68937 -1.45068
H 3.71443 3.75121 -1.93377
H 4.25568 -0.34891 -0.74141
H 4.98294 1.62834 -2.08745
H 2.38137 -0.16495 0.79482
C 0.67538 1.90972 1.08137
C -0.75413 2.88491 2.74676
H -1.01906 3.71003 3.40058
C 0.34492 2.98518 1.90343
H 0.97172 3.87027 1.89924
C -1.11916 0.67280 1.91257
H -1.65640 -0.26831 1.87560
C -1.49175 1.70524 2.76032
H -2.34410 1.57688 3.41788
N -0.07545 0.78602 1.07917
C -1.42013 -0.65180 -1.41568
C -0.44693 0.17753 -2.06900
C -1.07960 -2.00870 -1.13005
C 0.81209 -0.34308 -2.40018
H -0.63596 1.23630 -2.20594
C 0.17983 -2.55100 -1.52414
C 1.13023 -1.71327 -2.12400
H 1.58321 0.31906 -2.77883
H 0.45194 -3.55845 -1.23059
H 2.14050 -2.07355 -2.28291
H -1.78208 -2.59282 -0.54559
C -2.75121 -0.13622 -1.00615
C -4.60431 1.36345 -1.24100
H -5.08694 2.20988 -1.71977
C -3.32985 0.96662 -1.63623
H -2.82099 1.48800 -2.44010
C -4.58800 -0.44027 0.32588
```

## PBE1PBE Optimised Geometries and Energies

```
H -5.06208 -1.02948 1.10769
C -5.24897 0.65072 -0.23886
H -6.24484 0.92126 0.09559
N -3.37160 -0.83004 -0.04333
```

**E<sup>+</sup>** ( $\eta^6$ )

```
SCF (PBE1PBE) Energy = -1280.58694547
Enthalpy 0K = -1280.186823
Enthalpy 298K = -1280.161003
Free Energy 298K = -1280.243214
Lowest Frequency = 17.8592 cm-1
Second Frequency = 28.1246 cm-1
```

```
Ru 0.28788 -0.79295 -0.04973
O 0.91519 -0.65003 1.99866
C 2.02413 -0.59430 2.54683
C 2.16032 -0.57431 4.03112
O 3.15673 -0.55084 1.89799
H 2.64160 0.35921 4.33675
H 1.18304 -0.66332 4.50180
H 2.81353 -1.39136 4.34937
C 2.18987 1.28880 -0.90766
C 3.31454 1.87792 -1.49287
C 2.06453 -0.12018 -0.80301
C 4.34771 1.08376 -1.97498
H 3.39258 2.95833 -1.57628
C 3.13295 -0.89256 -1.28502
C 4.25921 -0.30090 -1.86249
H 5.22030 1.54243 -2.42858
H 3.09861 -1.97700 -1.21136
H 5.06766 -0.92839 -2.22711
H 2.98346 -0.52195 0.92698
C 1.08614 2.04716 -0.32878
C -0.06586 4.01618 0.44050
H -0.12442 5.09513 0.54553
C 1.01988 3.43594 -0.19675
H 1.82404 4.05239 -0.58149
C -0.95454 1.82718 0.79230
H -1.70464 1.14315 1.17755
C -1.06825 3.19832 0.95629
H -1.92603 3.60778 1.47753
N 0.08215 1.27021 0.14913
C -1.95981 -1.24611 -0.54585
C -1.10210 -1.07727 -1.69181
C -1.55966 -2.13337 0.46093
C 0.03037 -1.90362 -1.87984
H -1.33133 -0.32097 -2.43425
C -0.34943 -2.87891 0.31564
C 0.40342 -2.84281 -0.87463
H 0.65136 -1.77175 -2.75903
H -0.01031 -3.49825 1.14005
H 1.28955 -3.45633 -0.98529
H -2.14702 -2.19281 1.36999
C -3.22003 -0.47840 -0.40012
C -5.15117 0.60246 -1.32060
H -5.74297 0.92837 -2.17044
C -3.94498 -0.06297 -1.51883
H -3.59657 -0.28036 -2.52311
C -4.79103 0.37660 1.03033
H -5.09798 0.53443 2.06196
C -5.58684 0.82960 -0.02171
H -6.52215 1.34101 0.17944
N -3.63650 -0.26052 0.85532
```

**D**

```
SCF (PBE1PBE) Energy = -1509.02838442
Enthalpy 0K = -1508.578787
Enthalpy 298K = -1508.547570
Free Energy 298K = -1508.641739
Lowest Frequency = 23.9221 cm-1
```

## XYZ Coordinates and Computed Energies

## PBE1PBE Optimised Geometries and Energies

Second Frequency = 29.7182 cm<sup>-1</sup>

Ru 0.95128 -0.04731 -0.39167  
 O 2.21251 0.89905 -1.86195  
 C 1.75286 0.11753 -2.74641  
 C 2.33060 0.08520 -4.12713  
 O 0.80439 -0.66888 -2.42508  
 H 1.56631 -0.19188 -4.85531  
 H 2.77321 1.05015 -4.37861  
 H 3.11888 -0.67404 -4.15463  
 C -2.50937 0.07598 -0.93255  
 C -3.55916 -0.18059 -0.04411  
 C -2.21437 -0.85847 -1.93100  
 C -4.29440 -1.35813 -0.14134  
 H -3.78949 0.54300 0.73371  
 C -2.96448 -2.02562 -2.03560  
 C -4.00384 -2.27981 -1.14380  
 H -5.09874 -1.55138 0.56270  
 H -2.73358 -2.73967 -2.82128  
 H -4.58650 -3.19275 -1.22975  
 H -1.39141 -0.67110 -2.61274  
 C -1.82475 1.39184 -0.90421  
 C -2.04562 3.79164 -1.11162  
 H -2.66266 4.67924 -1.21512  
 C -2.62318 2.53459 -1.02956  
 H -3.69838 2.40695 -1.09329  
 C 0.07349 2.71166 -0.93650  
 H 1.15591 2.73011 -0.90794  
 C -0.65966 3.87729 -1.08578  
 H -0.14204 4.82658 -1.17056  
 N -0.47826 1.48772 -0.81991  
 C -0.07041 0.50820 2.34813  
 C -0.60674 1.29983 3.36567  
 C 0.98716 1.00101 1.55026  
 C -0.07943 2.56086 3.62222  
 H -1.45193 0.94176 3.94785  
 C 1.53046 2.25563 1.84847  
 C 0.99480 3.03487 2.86835  
 H -0.50093 3.17183 4.41504  
 H 2.39477 2.60082 1.28803  
 H 1.42168 4.00986 3.08687  
 H 1.81664 0.24855 1.13476  
 C -0.55778 -0.82629 2.01010  
 C -1.61665 -2.93824 2.46013  
 H -2.16817 -3.59885 3.12217  
 C -1.27481 -1.65896 2.87024  
 H -1.52888 -1.30672 3.86410  
 C -0.51323 -2.49507 0.38427  
 H -0.17236 -2.76951 -0.60767  
 C -1.22005 -3.36717 1.19547  
 H -1.45020 -4.36419 0.83655  
 N -0.20435 -1.24719 0.76862  
 O 2.35870 -1.54135 -0.32615  
 C 3.29955 -1.51710 0.56025  
 C 4.34305 -2.60037 0.38369  
 O 3.39685 -0.69178 1.47383  
 H 3.88536 -3.53172 0.04371  
 H 5.05544 -2.28050 -0.38387  
 H 4.88518 -2.75661 1.31708

## TS (D-E)

SCF (PBE1PBE) Energy = -1508.99269745  
 Enthalpy 0K = -1508.547618  
 Enthalpy 298K = -1508.516357  
 Free Energy 298K = -1508.610252  
 Lowest Frequency = -1188.5342 cm<sup>-1</sup>  
 Second Frequency = 29.4066 cm<sup>-1</sup>

Ru -0.69346 -0.36846 -0.60655  
 O -1.43697 -2.06784 -1.67242

C -0.69684 -1.82164 -2.67553  
 C -0.83731 -2.63260 -3.92999  
 O 0.13202 -0.86474 -2.61007  
 H 0.10093 -2.64307 -4.48686  
 H -1.15770 -3.64870 -3.69356  
 H -1.60572 -2.17244 -4.55983  
 C 2.75775 -0.36429 0.06724  
 C 3.54198 0.44078 0.90099  
 C 2.85089 -0.20834 -1.32022  
 C 4.39484 1.39723 0.35980  
 H 3.46788 0.32597 1.97926  
 C 3.71793 0.73892 -1.85685  
 C 4.49009 1.54370 -1.02199  
 H 4.98792 2.02529 1.01837  
 H 3.78949 0.84554 -2.93571  
 H 5.16581 2.28103 -1.44646  
 H 2.23263 -0.81762 -1.97181  
 C 1.95991 -1.46854 0.64962  
 C 1.98189 -3.48859 1.98465  
 H 2.50202 -4.18880 2.63127  
 C 2.62815 -2.36877 1.48821  
 H 3.67414 -2.18402 1.70740  
 C 0.04791 -2.76739 0.78789  
 H -0.97900 -2.89099 0.46994  
 C 0.66302 -3.70135 1.60250  
 H 0.10382 -4.57113 1.92951  
 N 0.65377 -1.64723 0.33622  
 C -1.18002 0.72826 2.07804  
 C -1.53650 0.74262 3.42707  
 C -1.74564 -0.21986 1.18817  
 C -2.48624 -0.15578 3.90481  
 H -1.07469 1.44569 4.11564  
 C -2.71815 -1.09532 1.69274  
 C -3.08557 -1.06720 3.03646  
 H -2.76466 -0.13913 4.95464  
 H -3.19486 -1.79982 1.01374  
 H -3.83982 -1.75536 3.40931  
 H -2.21796 0.28610 -0.07280  
 C -0.23486 1.66028 1.46390  
 C 1.04900 3.69139 1.33237  
 H 1.42336 4.60456 1.78527  
 C 0.25054 2.82376 2.06096  
 H -0.02998 3.05854 3.08179  
 C 0.84165 2.20527 -0.52488  
 H 1.04464 1.90939 -1.54785  
 C 1.33815 3.38396 0.00633  
 H 1.93985 4.03934 -0.61306  
 N 0.09826 1.34714 0.18494  
 O -2.49547 0.62990 -1.33424  
 C -2.67733 1.94386 -1.44260  
 C -3.40932 2.30369 -2.71401  
 O -2.32436 2.76600 -0.62174  
 H -2.80632 2.00604 -3.57721  
 H -4.34984 1.74921 -2.77132  
 H -3.60132 3.37627 -2.74590

## E

SCF (PBE1PBE) Energy = -1509.02242773  
 Enthalpy 0K = -1508.571572  
 Enthalpy 298K = -1508.539858  
 Free Energy 298K = -1508.636072  
 Lowest Frequency = 21.2879 cm<sup>-1</sup>  
 Second Frequency = 21.9380 cm<sup>-1</sup>

Ru 0.61390 0.45687 0.17297  
 O 1.49754 1.76001 1.59976  
 C 0.75504 2.77468 1.39349  
 C 0.97176 4.01790 2.21431  
 O -0.15685 2.73287 0.52446  
 H 0.12979 4.14388 2.90232

## XYZ Coordinates and Computed Energies

```

H 1.89703 3.95272 2.78769
H 0.99234 4.89495 1.56273
C -2.75910 -0.13966 0.60532
C -3.63830 -1.04723 0.00498
C -2.82619 1.21356 0.25303
C -4.55645 -0.61682 -0.94811
H -3.58579 -2.09914 0.27327
C -3.75739 1.64177 -0.68942
C -4.62121 0.73051 -1.29498
H -5.22312 -1.33478 -1.41724
H -3.80779 2.69591 -0.94788
H -5.34619 1.07015 -2.02953
H -2.14009 1.92367 0.70488
C -1.87101 -0.58717 1.70335
C -1.71867 -1.60898 3.89276
H -2.17900 -2.12542 4.72948
C -2.46392 -1.25607 2.77915
H -3.52865 -1.45775 2.73198
C 0.15985 -0.60555 2.81298
H 1.20185 -0.31845 2.78795
C -0.37654 -1.25072 3.91326
H 0.26231 -1.46878 4.76221
N -0.54461 -0.30080 1.69975
C 1.53797 -2.18515 -0.61928
C 2.33033 -3.33810 -0.64009
C 1.80974 -1.10852 0.26507
C 3.42837 -3.44191 0.20464
H 2.10256 -4.15751 -1.31853
C 2.94624 -1.23587 1.08475
C 3.74059 -2.38109 1.05723
H 4.04553 -4.33543 0.19054
H 3.21290 -0.41796 1.75390
H 4.61196 -2.45001 1.70504
H 2.95802 0.97820 -1.03622
C 0.42335 -1.93523 -1.52420
C -1.00997 -2.38909 -3.41214
H -1.33559 -3.04307 -4.21581
C 0.00191 -2.78414 -2.55189
H 0.48810 -3.74505 -2.68018
C -1.14850 -0.34872 -2.17913
H -1.59513 0.61876 -1.97785
C -1.59017 -1.13620 -3.23068
H -2.38258 -0.77270 -3.87543
N -0.17804 -0.72440 -1.33120
O 2.06277 1.27182 -1.27014
C 2.16370 2.35516 -2.10654
C 0.82928 2.88465 -2.50913
O 3.24669 2.75870 -2.43589
H 0.26803 3.16401 -1.61069
H 0.97066 3.73853 -3.17019
H 0.26424 2.10035 -3.02090

```

**E** (without HOAc)

```

SCF (PBE1PBE) Energy = -1280.18036574
Enthalpy 0K = -1279.793669
Enthalpy 298K = -1279.768044
Free Energy 298K = -1279.848829
Lowest Frequency = 31.8652 cm-1
Second Frequency = 37.9891 cm-1

```

```

Ru -0.23832 -0.67661 -0.17699
O -0.71659 -2.74550 0.23584
C -1.05235 -2.90469 -0.98155
C -1.63403 -4.20435 -1.44909
O -0.91160 -1.93105 -1.78205
H -1.44453 -4.34490 -2.51441
H -1.22668 -5.03502 -0.86998
H -2.71791 -4.17988 -1.29485
C 2.72027 -0.14948 0.58170
C 3.90153 0.55987 0.33636

```

## PBE1PBE Optimised Geometries and Energies

```

C 2.32191 -1.13092 -0.33901
C 4.66357 0.29433 -0.79691
H 4.20389 1.35359 1.01357
C 3.08514 -1.39477 -1.47416
C 4.25721 -0.68025 -1.70759
H 5.57216 0.86149 -0.97742
H 2.75469 -2.15763 -2.17242
H 4.85146 -0.88007 -2.59433
H 1.48223 -1.80781 -0.09924
C 1.87430 0.15324 1.74966
C 1.61292 0.82153 4.05240
H 2.03728 1.12652 5.00374
C 2.43091 0.55067 2.96628
H 3.51010 0.61836 3.05260
C -0.25676 0.26845 2.66337
H -1.31953 0.13989 2.49402
C 0.23864 0.67486 3.89045
H -0.45341 0.86709 4.70338
N 0.52909 0.00863 1.59756
C -2.35673 1.27022 -0.31039
C -3.61926 1.84487 -0.11787
C -2.06679 -0.04240 0.14162
C -4.62025 1.12765 0.52188
H -3.82769 2.85436 -0.46534
C -3.10247 -0.74674 0.78120
C -4.35631 -0.17051 0.96782
H -5.59985 1.57179 0.67202
H -2.91377 -1.75818 1.13424
H -5.14069 -0.73741 1.46507
C -1.24867 1.93189 -0.98419
C -0.18142 3.70904 -2.22110
H -0.21428 4.69339 -2.67863
C -1.29228 3.20099 -1.56802
H -2.20836 3.77856 -1.51298
C 0.96183 1.68146 -1.68386
H 1.83426 1.03934 -1.71569
C 0.97008 2.92847 -2.28735
H 1.86436 3.27146 -2.79611
N -0.10595 1.18386 -1.03755

```

**3D+**

```

SCF (PBE1PBE) Energy = -1678.43837997
Enthalpy 0K = -1677.895058
Enthalpy 298K = -1677.854617
Free Energy 298K = -1677.970804
Lowest Frequency = 20.0565 cm-1
Second Frequency = 21.7603 cm-1

```

```

Ru -0.00091 0.82408 0.54213
C 1.96771 -1.52775 -1.34098
C 1.17021 -2.63776 -1.05299
C 3.35071 -1.61675 -1.14129
C 1.73693 -3.80021 -0.53688
H 0.10560 -2.61165 -1.25898
C 3.91336 -2.77495 -0.61604
C 3.10791 -3.86991 -0.31005
H 1.10387 -4.65753 -0.32761
H 4.98667 -2.82606 -0.45749
H 3.55033 -4.77932 0.08576
H 3.97380 -0.75919 -1.37672
C 1.41820 -0.34792 -2.06221
C 1.35964 0.81422 -4.19015
H 1.69936 0.92536 -5.21522
C 1.85385 -0.19668 -3.38524
H 2.57765 -0.90873 -3.76546
C 0.02872 1.47768 -2.33087
H -0.69756 2.13879 -1.87651
C 0.40500 1.66542 -3.64769
H -0.04019 2.47012 -4.22279
N 0.51843 0.51119 -1.52563

```

## XYZ Coordinates and Computed Energies

```

C -2.75680 -1.32276 -0.30185
C -2.37722 -1.05777 -1.62051
C -4.11089 -1.21938 0.04313
C -3.32551 -0.68377 -2.56784
H -1.33797 -1.14929 -1.91027
C -5.05845 -0.83898 -0.90229
C -4.66773 -0.56993 -2.21290
H -3.01464 -0.49674 -3.59165
H -6.10486 -0.76836 -0.61899
H -5.40832 -0.29253 -2.95750
H -4.41955 -1.43361 1.06309
C -1.79931 -1.83086 0.71288
C -1.29789 -3.61612 2.27246
H -1.55962 -4.55736 2.74640
C -2.13443 -3.04340 1.32757
H -3.05349 -3.53477 1.02771
C 0.16756 -1.76327 1.93174
H 1.09176 -1.22513 2.11780
C -0.11401 -2.95822 2.57345
H 0.59815 -3.35699 3.28763
N -0.64923 -1.18382 1.02699
O 1.89387 0.30726 1.19175
C 3.02773 0.78788 0.76868
C 4.19386 0.38389 1.65148
O 3.19667 1.48092 -0.23189
H 4.28356 -0.70640 1.66525
H 5.12006 0.82174 1.27812
H 4.02004 0.70911 2.68149
N 0.69773 2.68346 0.28957
C 1.28044 3.66747 0.13621
C 2.13336 4.81709 -0.08051
H 2.16263 5.45122 0.80905
H 3.13865 4.44007 -0.29419
H 1.77941 5.40797 -0.92892
N -0.35119 1.23031 2.47017
C -0.48707 1.45260 3.59600
C -0.64439 1.73060 5.01107
H -1.04286 2.73834 5.15581
H -1.33173 1.01016 5.46255
H 0.32397 1.65807 5.51368
N -1.85104 1.48006 0.12310
C -2.87572 1.99397 -0.04032
C -4.16966 2.61455 -0.25027
H -4.13538 3.67185 0.02634
H -4.45854 2.52484 -1.30069
H -4.92429 2.10859 0.35766

```

INT ( $^3D^+$ )

SCF (PBE1PBE) Energy = -1678.41891901

Enthalpy 0K = -1677.875945

Enthalpy 298K = -1677.835411

Free Energy 298K = -1677.952220

Lowest Frequency = 17.7199  $\text{cm}^{-1}$ Second Frequency = 23.9745  $\text{cm}^{-1}$ 

```

Ru 0.30649 0.78833 0.23455
C -2.13962 -0.89691 -1.52805
C -1.51197 -1.99739 -2.09424
C -1.50537 0.36770 -1.59899
C -0.27030 -1.86968 -2.73524
H -2.01472 -2.95936 -2.06029
C -0.26148 0.49043 -2.22894
C 0.35398 -0.64112 -2.80756
H 0.18244 -2.74063 -3.20061
H 0.13634 1.48229 -2.41744
H 1.29845 -0.53117 -3.33250
H -2.00065 1.27773 -1.26477
C -3.46731 -1.05292 -0.89266
C -5.67005 -0.24471 -0.36691
H -6.43455 0.52579 -0.41344

```

## PBE1PBE Optimised Geometries and Energies

```

C -4.42320 -0.02978 -0.94195
H -4.20149 0.90403 -1.44824
C -4.91533 -2.42188 0.25047
H -5.07840 -3.39117 0.71806
C -5.92798 -1.46665 0.24737
H -6.88929 -1.68277 0.70159
N -3.71578 -2.23233 -0.29892
C 2.95709 -1.59092 0.12954
C 2.83349 -2.85797 -0.44917
C 3.06907 -1.48477 1.51837
C 2.78645 -3.99618 0.35046
H 2.76689 -2.94809 -1.52987
C 3.02911 -2.62288 2.31679
C 2.88186 -3.88073 1.73616
H 2.69403 -4.97578 -0.11010
H 3.13071 -2.53104 3.39430
H 2.86352 -4.76998 2.35948
H 3.20339 -0.50677 1.96739
C 3.13119 -0.39851 -0.73604
C 4.56535 0.71318 -2.33903
H 5.44111 0.71732 -2.98078
C 4.25838 -0.39472 -1.56519
H 4.90014 -1.26903 -1.56114
C 2.62065 1.74914 -1.42101
H 1.93967 2.58715 -1.31384
C 3.73454 1.82102 -2.24137
H 3.92958 2.73401 -2.79338
N 2.28501 0.65980 -0.69873
O 0.37507 2.82175 -0.17919
C -0.65166 3.59156 -0.42094
C -0.27849 5.05814 -0.50306
O -1.81320 3.22294 -0.57430
H -1.14751 5.65175 -0.78608
H 0.09949 5.39975 0.46525
H 0.52402 5.20843 -1.23084
N -1.43967 1.03898 1.18408
C -2.42274 1.23754 1.75344
C -3.67727 1.54621 2.40846
H -3.55995 1.52770 3.49483
H -4.00143 2.54346 2.09671
H -4.43652 0.81666 2.11376
N 1.18673 1.28520 1.90980
C 1.66810 1.70143 2.87431
C 2.28181 2.22807 4.07835
H 3.37127 2.18335 3.99510
H 1.98358 3.27032 4.22153
H 1.96856 1.64615 4.94932
N 0.09841 -1.16323 0.67428
C -0.29203 -2.22831 0.89485
C -0.85043 -3.54682 1.11140
H -0.87862 -3.77874 2.17925
H -1.86816 -3.54668 0.70037
H -0.24009 -4.29692 0.60291

```

TS ( $^3D^+-^3E^+$ )

SCF (PBE1PBE) Energy = -1678.39560433

Enthalpy 0K = -1677.857883

Enthalpy 298K = -1677.817922

Free Energy 298K = -1677.932553

Lowest Frequency = -1085.5166  $\text{cm}^{-1}$ Second Frequency = 19.6719  $\text{cm}^{-1}$ 

```

Ru -0.14687 -0.95167 0.27150
C 1.56940 1.12618 -1.54080
C 1.46909 2.16441 -2.47560
C 0.66351 0.03638 -1.57424
C 0.54814 2.10559 -3.51525
H 2.15867 3.00068 -2.40295
C -0.22723 -0.00420 -2.66932

```

## XYZ Coordinates and Computed Energies

## PBE1PBE Optimised Geometries and Energies

C -0.28735 0.99518 -3.63238  
 H 0.50511 2.90595 -4.24846  
 H -0.89252 -0.85866 -2.76873  
 H -0.98274 0.91618 -4.46313  
 H 1.21933 -1.20635 -1.44837  
 C 2.75275 1.19182 -0.63935  
 C 4.90117 0.33744 0.02259  
 H 5.68413 -0.41440 -0.03854  
 C 3.71858 0.17757 -0.68951  
 H 3.55229 -0.69611 -1.31124  
 C 4.05806 2.43281 0.78270  
 H 4.16284 3.35084 1.35929  
 C 5.07991 1.48874 0.78427  
 H 5.99223 1.66548 1.34486  
 N 2.92590 2.30601 0.08714  
 C -2.53333 1.79907 0.14971  
 C -1.65718 2.54785 -0.63895  
 C -3.10787 2.38835 1.28243  
 C -1.35845 3.86296 -0.29605  
 H -1.22456 2.10832 -1.52944  
 C -2.80085 3.70107 1.62866  
 C -1.92985 4.44443 0.83372  
 H -0.68418 4.43607 -0.92542  
 H -3.25868 4.14918 2.50599  
 H -1.70718 5.47687 1.08812  
 H -3.80426 1.81587 1.88997  
 C -3.01242 0.46074 -0.27981  
 C -4.94969 -0.80329 -1.01086  
 H -6.00984 -0.86088 -1.23791  
 C -4.38315 0.37685 -0.56181  
 H -4.98227 1.27285 -0.44310  
 C -2.77088 -1.76061 -0.86209  
 H -2.09922 -2.60485 -0.95666  
 C -4.11274 -1.89922 -1.17137  
 H -4.48028 -2.85603 -1.52611  
 N -2.20261 -0.61713 -0.41984  
 O -0.15874 -2.86004 -0.63543  
 C 0.80836 -3.17561 -1.39353  
 C 0.88895 -4.58098 -1.90911  
 O 1.69493 -2.34730 -1.75335  
 H 1.91848 -4.94007 -1.85000  
 H 0.22091 -5.24017 -1.35548  
 H 0.60706 -4.58481 -2.96675  
 N 1.60054 -1.47114 1.06850  
 C 2.55881 -1.82007 1.61191  
 C 3.77615 -2.24718 2.27291  
 H 3.56516 -2.55220 3.30134  
 H 4.21530 -3.09285 1.73638  
 H 4.49362 -1.42201 2.28248  
 N -1.06385 -1.77546 1.88155  
 C -1.60111 -2.27329 2.77607  
 C -2.28026 -2.90290 3.89287  
 H -3.36252 -2.79528 3.78085  
 H -2.03375 -3.96748 3.92952  
 H -1.97453 -2.43527 4.83259  
 N 0.06223 0.77276 1.24764  
 C 0.36797 1.71293 1.84432  
 C 0.76766 2.91625 2.54423  
 H 1.44732 2.66763 3.36369  
 H 1.28539 3.56209 1.82955  
 H -0.11095 3.43061 2.93892

3E+

SCF (PBE1PBE) Energy = -1678.40794139

Enthalpy 0K = -1677.865639

Enthalpy 298K = -1677.824893

Free Energy 298K = -1677.942802

Lowest Frequency = 18.7146 cm<sup>-1</sup>Second Frequency = 20.8932 cm<sup>-1</sup>

Ru 0.19059 -0.84729 -0.35341  
 C -1.74906 0.84046 1.54378  
 C -2.07317 1.35441 2.81419  
 C -0.58348 0.04487 1.35680  
 C -1.29336 1.10598 3.93353  
 H -2.96312 1.97191 2.91169  
 C 0.14641 -0.22395 2.54285  
 C -0.17830 0.28606 3.79518  
 H -1.56400 1.52753 4.89681  
 H 1.02375 -0.86278 2.47805  
 H 0.43976 0.04461 4.65617  
 H -1.64620 -1.60743 1.54061  
 C -2.78101 1.15450 0.50566  
 C -5.10368 1.05101 -0.15538  
 H -6.12401 0.71672 0.01242  
 C -4.09148 0.69662 0.72618  
 H -4.30217 0.07959 1.59445  
 C -3.46055 2.25616 -1.38694  
 H -3.17754 2.89635 -2.22209  
 C -4.78461 1.85333 -1.24738  
 H -5.53827 2.17511 -1.95915  
 N -2.47872 1.93005 -0.54315  
 C 2.53561 1.90210 0.22386  
 C 1.57194 2.50894 1.03322  
 C 3.19145 2.67232 -0.74662  
 C 1.25704 3.85361 0.85722  
 H 1.07858 1.93638 1.80875  
 C 2.87452 4.01606 -0.92010  
 C 1.90362 4.61073 -0.11603  
 H 0.51014 4.31183 1.49840  
 H 3.39801 4.60148 -1.67099  
 H 1.66460 5.66339 -0.23754  
 H 3.95671 2.21219 -1.36682  
 C 3.02259 0.51499 0.45011  
 C 4.96506 -0.82649 1.01866  
 H 6.01324 -0.90259 1.29101  
 C 4.37930 0.40597 0.79011  
 H 4.95296 1.32074 0.88916  
 C 2.83477 -1.78589 0.55172  
 H 2.18937 -2.64853 0.44604  
 C 4.16406 -1.95430 0.89535  
 H 4.54993 -2.95430 1.06127  
 N 2.24506 -0.59009 0.33016  
 O 0.10369 -2.78273 0.60719  
 C -0.81263 -3.26106 1.28845  
 C -0.82731 -4.69673 1.69299  
 O -1.83166 -2.56496 1.71929  
 H -0.64241 -4.76449 2.76968  
 H -1.81441 -5.12721 1.50845  
 H -0.06096 -5.25121 1.15396  
 N -1.60827 -1.24285 -1.09299  
 C -2.62371 -1.50672 -1.58121  
 C -3.90832 -1.81968 -2.17692  
 H -3.77310 -2.39420 -3.09733  
 H -4.51112 -2.40632 -1.47810  
 H -4.44033 -0.89200 -2.40358  
 N 1.06135 -1.84462 -2.01861  
 C 1.53692 -2.37873 -2.92820  
 C 2.13766 -3.04692 -4.06804  
 H 1.74870 -2.62535 -4.99872  
 H 3.22303 -2.91690 -4.04892  
 H 1.90948 -4.11579 -4.04159  
 N 0.20857 0.82297 -1.37578  
 C 0.09956 1.78094 -2.00947  
 C -0.06918 3.01533 -2.74630  
 H -0.59549 2.83124 -3.68688  
 H -0.65135 3.70668 -2.13055  
 H 0.90422 3.46387 -2.95738

6E2+ (\*single point)

## XYZ Coordinates and Computed Energies

## PBE1PBE Optimised Geometries and Energies

SCF (PBE1PBE) Energy = -890.152369530  
 Enthalpy 0K = -889.862603  
 Enthalpy 298K = -889.837463  
 Free Energy 298K = -889.914009  
 Lowest Frequency = 74.6860 cm<sup>-1</sup>  
 Second Frequency = 74.6901 cm<sup>-1</sup>

**3A<sup>2+</sup>**

SCF (PBE1PBE) Energy = -724.220592864  
 Enthalpy 0K = -723.972960  
 Enthalpy 298K = -723.952525  
 Free Energy 298K = -724.025050  
 Lowest Frequency = 23.3578 cm<sup>-1</sup>  
 Second Frequency = 25.4738 cm<sup>-1</sup>

|    |          |          |          |
|----|----------|----------|----------|
| C  | 2.16662  | 1.40270  | -0.21259 |
| C  | 2.16690  | 0.50134  | -1.32675 |
| C  | 2.16715  | -0.88510 | -1.10771 |
| C  | 2.16697  | -1.39931 | 0.22996  |
| C  | 2.16674  | -0.51641 | 1.32116  |
| C  | 2.16671  | 0.89916  | 1.09765  |
| Ru | 0.45535  | 0.00020  | 0.00011  |
| H  | 2.10436  | -1.56611 | -1.95024 |
| H  | 2.10373  | 1.58097  | 1.93952  |
| H  | 2.10336  | 2.47283  | -0.38105 |
| H  | 2.10351  | -0.90562 | 2.33214  |
| H  | 2.10428  | -2.46931 | 0.39942  |
| H  | 2.10389  | 0.88947  | -2.33815 |
| N  | -0.81279 | 0.24870  | 1.59011  |
| C  | -1.51387 | 0.39038  | 2.49664  |
| C  | -2.38462 | 0.56898  | 3.63912  |
| H  | -3.43009 | 0.52760  | 3.32010  |
| H  | -2.20202 | -0.22288 | 4.37178  |
| H  | -2.19043 | 1.53972  | 4.10507  |
| N  | -0.81221 | -1.50150 | -0.57967 |
| N  | -0.81259 | 1.25273  | -1.01062 |
| C  | -1.51349 | 1.96679  | -1.58703 |
| C  | -1.51238 | -2.35812 | -0.91032 |
| C  | -2.38216 | -3.43763 | -1.32687 |
| H  | -2.19577 | -4.32254 | -0.71094 |
| H  | -3.42794 | -3.13713 | -1.21488 |
| H  | -2.19064 | -3.68438 | -2.37549 |
| C  | -2.38414 | 2.86660  | -2.31344 |
| H  | -3.42943 | 2.60073  | -2.13126 |
| H  | -2.21324 | 3.89544  | -1.98260 |
| H  | -2.17834 | 2.79637  | -3.38577 |

**5F<sup>+</sup>** (κ<sup>1</sup>)

SCF (PBE1PBE) Energy = -986.063406307  
 Enthalpy 0K = -985.771833  
 Enthalpy 298K = -985.741698  
 Free Energy 298K = -985.839992  
 Lowest Frequency = 8.0544 cm<sup>-1</sup>  
 Second Frequency = 19.3268 cm<sup>-1</sup>

|   |          |          |          |
|---|----------|----------|----------|
| N | 1.32200  | 1.44565  | 0.85500  |
| C | 1.84810  | 2.27560  | 1.46047  |
| N | 1.32499  | -1.40696 | 0.91288  |
| C | 1.85340  | -2.21022 | 1.55145  |
| N | 1.58033  | -0.03221 | -1.64156 |
| C | 2.30182  | -0.05070 | -2.54504 |
| N | -0.86016 | -1.42404 | -0.91451 |
| C | -1.66911 | -2.15577 | -1.28684 |
| C | 2.49630  | 3.31863  | 2.23142  |
| H | 2.45587  | 4.26694  | 1.68903  |
| H | 1.98720  | 3.43717  | 3.19178  |
| H | 3.54240  | 3.05878  | 2.41354  |
| C | 3.20510  | -0.07413 | -3.68011 |
| H | 4.19617  | 0.27637  | -3.37959 |
| H | 3.29331  | -1.09216 | -4.06909 |

|    |          |          |          |
|----|----------|----------|----------|
| H  | 2.82667  | 0.57554  | -4.47395 |
| C  | -2.75612 | -3.02080 | -1.69412 |
| H  | -2.57335 | -4.04682 | -1.36518 |
| H  | -3.67469 | -2.64993 | -1.22908 |
| H  | -2.87010 | -3.00913 | -2.78094 |
| C  | 2.50458  | -3.21916 | 2.36411  |
| H  | 3.55898  | -2.96760 | 2.50541  |
| H  | 2.01825  | -3.27488 | 3.34181  |
| H  | 2.43528  | -4.19562 | 1.87743  |
| O  | -2.92300 | 0.00791  | 0.49984  |
| C  | -2.23209 | 0.02875  | 1.51527  |
| C  | -2.85985 | 0.05529  | 2.89694  |
| H  | -2.52930 | 0.94352  | 3.44287  |
| H  | -3.94693 | 0.05630  | 2.81583  |
| H  | -2.53368 | -0.81463 | 3.47416  |
| O  | -0.92915 | 0.03095  | 1.56809  |
| Ru | 0.28848  | -0.00138 | -0.08384 |
| N  | -0.86268 | 1.38443  | -0.97144 |
| C  | -1.67307 | 2.09925  | -1.37242 |
| C  | -2.76186 | 2.94533  | -1.81335 |
| H  | -3.67929 | 2.59228  | -1.33247 |
| H  | -2.58031 | 3.98418  | -1.52671 |
| H  | -2.87710 | 2.88921  | -2.89865 |

**4F<sup>+</sup>** (κ<sup>2</sup>)

SCF (PBE1PBE) Energy = -853.454432539  
 Enthalpy 0K = -853.210143  
 Enthalpy 298K = -853.185109  
 Free Energy 298K = -853.270675  
 Lowest Frequency = 17.3498 cm<sup>-1</sup>  
 Second Frequency = 18.1497 cm<sup>-1</sup>

|    |          |          |          |
|----|----------|----------|----------|
| N  | 2.00348  | 0.16724  | 0.00024  |
| C  | 3.15117  | 0.29463  | 0.00003  |
| N  | 0.01658  | -1.32265 | 1.42331  |
| C  | 0.02570  | -2.07637 | 2.29991  |
| N  | 0.01694  | -1.32277 | -1.42323 |
| C  | 0.02584  | -2.07712 | -2.29930 |
| N  | -2.00306 | 0.12175  | -0.00032 |
| C  | -3.15387 | 0.21757  | -0.00042 |
| C  | 4.59071  | 0.46518  | -0.00015 |
| H  | 4.89886  | 1.02014  | -0.89041 |
| H  | 4.89893  | 1.02136  | 0.88933  |
| H  | 5.08574  | -0.50950 | 0.00050  |
| C  | 0.03775  | -3.00557 | -3.41347 |
| H  | 0.93700  | -3.62629 | -3.37662 |
| H  | -0.84108 | -3.65460 | -3.37216 |
| H  | 0.02664  | -2.45381 | -4.35759 |
| C  | -4.59769 | 0.34749  | -0.00061 |
| H  | -5.06485 | -0.64086 | -0.00212 |
| H  | -4.92192 | 0.89265  | 0.89000  |
| H  | -4.92145 | 0.89513  | -0.88988 |
| C  | 0.03689  | -3.00419 | 3.41462  |
| H  | 0.92987  | -3.63349 | 3.37169  |
| H  | 0.03784  | -2.45175 | 4.35842  |
| H  | -0.84838 | -3.64481 | 3.38014  |
| O  | -0.01551 | 1.88139  | -1.08675 |
| C  | -0.02617 | 2.54683  | -0.00014 |
| C  | -0.07747 | 4.03718  | -0.00020 |
| H  | 0.39907  | 4.43209  | 0.89814  |
| H  | 0.39860  | 4.43200  | -0.89882 |
| H  | -1.12417 | 4.35854  | 0.00008  |
| O  | -0.01580 | 1.88149  | 1.08654  |
| Ru | 0.00102  | 0.07912  | -0.00002 |

**f-3F** (κ<sup>2</sup>κ<sup>1</sup>)

SCF (PBE1PBE) Energy = -949.259776610  
 Enthalpy 0K = -949.011846  
 Enthalpy 298K = -948.986205  
 Free Energy 298K = -949.070867



## XYZ Coordinates and Computed Energies

## PBE1PBE Optimised Geometries and Energies

Lowest Frequency = 21.5146 cm<sup>-1</sup>  
 Second Frequency = 31.3245 cm<sup>-1</sup>

```
Ru -0.36187  0.04232  0.00000
N  -1.96261 -1.12108 -0.00001
C  -2.93070 -1.75813 -0.00002
N   0.57364 -1.00314  1.37894
C   1.24814 -1.51114  2.16782
N   0.57365 -1.00313 -1.37894
C   1.24816 -1.51112 -2.16782
C  -4.14936 -2.54562 -0.00004
H  -4.74690 -2.31799 -0.88756
H  -3.91338 -3.61356 -0.00197
H  -4.74512 -2.32081  0.88940
C   2.19432 -2.07456  3.10922
H   2.00689 -1.69470  4.11734
H   2.12731 -3.16567  3.12463
H   3.20226 -1.78236  2.79852
C   2.19429 -2.07454 -3.10927
H   2.00662 -1.69490 -4.11744
H   3.20223 -1.78211 -2.79879
H   2.12746 -3.16566 -3.12447
O  -1.42289  1.52275 -1.09152
C  -1.74238  2.08911  0.00001
O  -1.42289  1.52274  1.09153
C  -2.44517  3.41105  0.00002
H  -3.05539  3.51797  0.89845
H  -1.69071  4.20424  0.00001
H  -3.05541  3.51797 -0.89841
O   1.14830  1.43006  0.00001
C   2.41632  1.16887  0.00002
O   2.95093  0.05922  0.00002
C   3.26099  2.43605  0.00003
H   3.02277  3.04174  0.87944
H   4.32285  2.18560  0.00003
H   3.02277  3.04176 -0.87936
```

*m*-<sup>3</sup>F (κ<sup>2</sup>κ<sup>1</sup>)

SCF (PBE1PBE) Energy = -949.256795661  
 Enthalpy 0K = -949.009154  
 Enthalpy 298K = -948.983255  
 Free Energy 298K = -949.069528  
 Lowest Frequency = 19.0306 cm<sup>-1</sup>  
 Second Frequency = 30.1009 cm<sup>-1</sup>

```
Ru -0.33790  0.12011 -0.08955
N  -1.67618 -1.33210  0.07362
C  -2.45717 -2.16955  0.23436
N   0.70397 -0.89980 -1.39637
C   1.38806 -1.48412 -2.12294
N   1.01230  1.57328 -0.14626
C   1.87698  2.33695 -0.11224
C  -3.43560 -3.21765  0.45197
H  -2.93230 -4.17551  0.60994
H  -4.03677 -2.98871  1.33638
H  -4.09967 -3.30557 -0.41244
C   2.32316 -2.20574 -2.96274
H   1.95680 -3.21558 -3.16697
H   2.46825 -1.68738 -3.91481
H   3.28480 -2.27584 -2.44505
C   3.03030  3.20834 -0.02206
H   2.86112  3.99014  0.72317
H   3.89357  2.60727  0.27924
H   3.23794  3.67801 -0.98716
O  -1.75248  1.33391 -1.17765
C  -2.17153  1.81722 -0.08156
O  -1.65366  1.41068  1.00404
C  -3.23585  2.87469 -0.06756
H  -3.86319  2.76627  0.81917
H  -2.76004  3.85985 -0.02473
```

```
H  -3.83829  2.82107 -0.97554
O   0.68406 -0.81659  1.43392
C   1.97172 -0.93654  1.49762
O   2.79998 -0.57409  0.66232
C   2.41783 -1.60422  2.79299
H   1.90699 -2.56295  2.92024
H   3.49826 -1.75575  2.78803
H   2.13905 -0.97755  3.64570
```

*c*-<sup>2</sup>F (2κ<sup>2</sup>)

SCF (PBE1PBE) Energy = -816.650758309  
 Enthalpy 0K = -816.450256  
 Enthalpy 298K = -816.429565  
 Free Energy 298K = -816.502605  
 Lowest Frequency = 24.0897 cm<sup>-1</sup>  
 Second Frequency = 24.3216 cm<sup>-1</sup>

```
Ru  0.00000  0.08767 -0.00000
N   1.23371 -1.25834 -0.68103
C   1.99141 -2.02037 -1.11636
N  -1.23370 -1.25835  0.68103
C  -1.99141 -2.02035  1.11637
C   2.93233 -2.96342 -1.69067
H   3.65952 -2.43517 -2.31427
H   3.47102 -3.49692 -0.90219
H   2.40674 -3.69394 -2.31262
C  -2.93235 -2.96338  1.69070
H  -3.65887 -2.43523  2.31516
H  -3.47182 -3.49610  0.90223
H  -2.40666 -3.69455  2.31179
O   1.45902  1.61172 -0.27441
C   1.88482  1.41165  0.90558
C   2.94455  2.28729  1.49917
H   3.47126  1.76166  2.29694
H   3.64107  2.61403  0.72492
H   2.46862  3.17688  1.92440
O   1.36223  0.47106  1.58239
O  -1.36223  0.47105 -1.58239
C  -1.88484  1.41162 -0.90558
O  -1.45902  1.61172  0.27440
C  -2.94456  2.28726 -1.49919
H  -3.64104  2.61406 -0.72493
H  -2.46862  3.17682 -1.92448
H  -3.47131  1.76160 -2.29691
```

*t*-<sup>2</sup>F (2κ<sup>2</sup>) (\* single point)

SCF (PBE1PBE) Energy = -816.645728159  
 Enthalpy 0K = -816.444756  
 Enthalpy 298K = -816.426585  
 Free Energy 298K = -816.488453  
 Lowest Frequency = 76.6675 cm<sup>-1</sup>  
 Second Frequency = 80.4370 cm<sup>-1</sup>

*c*-<sup>4</sup>F (2κ<sup>1</sup>)

SCF (PBE1PBE) Energy = -1081.86334470  
 Enthalpy 0K = -1081.568290  
 Enthalpy 298K = -1081.537495  
 Free Energy 298K = -1081.634667  
 Lowest Frequency = 25.6858 cm<sup>-1</sup>  
 Second Frequency = 26.0715 cm<sup>-1</sup>

```
N  -1.06191  1.68358  0.09362
C  -1.77510  2.57366 -0.07593
N   1.28402  0.74278  1.51156
C   2.16757  1.15439  2.13216
N   1.06171 -1.68372  0.08886
C   1.77464 -2.57356 -0.08306
C  -2.75288  3.60891 -0.34022
```

## XYZ Coordinates and Computed Energies

```

H -2.40301  4.26815 -1.13895
H -3.68362  3.12672 -0.65428
H -2.94104  4.20548  0.55617
C  3.36629  1.64549  2.78105
H  3.26354  2.70310  3.03824
H  3.57758  1.07939  3.69218
H  4.19907  1.52475  2.08085
C  2.75206 -3.60846 -0.35008
H  2.40192 -4.26549 -1.15049
H  3.68300 -3.12585 -0.66290
H  2.94004 -4.20741  0.54477
O -3.20919 -0.16812 -0.63580
C -2.43265 -0.70175 -1.43264
O -1.14795 -0.79790 -1.33936
C -2.96300 -1.33965 -2.71139
H -2.57190 -0.79907 -3.57878
H -2.61074 -2.37188 -2.79351
H -4.05382 -1.31525 -2.72610
O  1.14777  0.80216 -1.33708
C  2.43242  0.70596 -1.43084
O  3.20893  0.16968 -0.63576
C  2.96278  1.34777 -2.70765
H  2.61101  2.38044 -2.78629
H  4.05358  1.32290 -2.72270
H  2.57119  0.81022 -3.57671
Ru -0.00002 -0.00016  0.18415
N -1.28367 -0.74703  1.50967
C -2.16681 -1.16058  2.12957
C -3.36495 -1.65392  2.77785
H -3.57642 -1.08969  3.69009
H -4.19807 -1.53258  2.07818
H -3.26122 -2.71191  3.03308

```

$t\text{-}^4\mathbf{F}$  ( $2\kappa^1$ )

```

SCF (PBE1PBE) Energy = -1081.86277701
Enthalpy 0K = -1081.567831
Enthalpy 298K = -1081.536831
Free Energy 298K = -1081.635158
Lowest Frequency = 26.4601 cm-1
Second Frequency = 30.5174 cm-1

```

```

N -1.10397 -1.39527 -0.89070
C -1.81990 -2.15605 -1.38030
N -1.10385  1.39594 -0.88977
C -1.81970  2.15708 -1.37893
N  1.10395  1.39526  0.89071
C  1.81991  2.15602  1.38031
C -2.79460 -3.06845 -1.94323
H -2.80666 -2.99101 -3.03370
H -2.55919 -4.09957 -1.66656
H -3.78469 -2.81212 -1.55458
C -2.79428  3.07003 -1.94118
H -2.80632  2.99341 -3.03171
H -3.78442  2.81352 -1.55275
H -2.55875  4.10091 -1.66373
C  2.79469  3.06837  1.94320
H  2.80659  2.99113  3.03369
H  3.78478  2.81180  1.55471
H  2.55948  4.09947  1.66629
O -3.22521 -0.00000  0.59406
C -2.53054 -0.00048  1.61161
O -1.24010 -0.00064  1.68133
C -3.18394 -0.00098  2.98990
H -2.86220 -0.88058  3.55568
H -2.86225  0.87824  3.55628
H -4.27098 -0.00098  2.89586
O  1.24009  0.00063 -1.68130
C  2.53053  0.00053 -1.61160
O  3.22522  0.00009 -0.59405
C  3.18391  0.00107 -2.98990

```

## PBE1PBE Optimised Geometries and Energies

```

H  2.86245  0.88089 -3.55549
H  4.27095  0.00072 -2.89587
H  2.86193 -0.87792 -3.55647
Ru -0.00001 -0.00000  0.00001
N  1.10385 -1.39595  0.88978
C  1.81973 -2.15709  1.37891
C  2.79427 -3.07009  1.94114
H  2.80650 -2.99332  3.03166
H  2.55858 -4.10097  1.66385
H  3.78437 -2.81375  1.55250

```

$^1\mathbf{A}$

```

SCF (PBE1PBE) Energy = -916.007063194
Enthalpy 0K = -915.751446
Enthalpy 298K = -915.730036
Free Energy 298K = -915.803251
Lowest Frequency = 17.4093 cm-1
Second Frequency = 42.3731 cm-1

```

```

Ru  0.25092  0.03873 -0.09927
O  1.39013  0.84658  1.50974
C  1.82318  1.75865  0.73827
C  2.68418  2.86564  1.25781
C -1.00423 -1.84188  0.16349
C -0.58655 -1.34705  1.42992
C -1.54759 -0.70121  2.26962
C -2.84237 -0.54713  1.85606
O  1.47294  1.72196 -0.48323
H  2.04094  3.69881  1.55910
H  3.24694  2.53208  2.13102
H  3.35695  3.22051  0.47525
C -3.26597 -1.06423  0.60260
C -2.37767 -1.71027 -0.21300
H -2.70587 -2.14534 -1.15222
H -3.56181 -0.04696  2.49821
H -0.40256 -2.57720 -0.36282
H -1.23221 -0.34290  3.24489
C -1.56431  1.08280 -1.40033
O -1.37798  1.38858 -0.18370
O -0.83497  0.16412 -1.89901
C -2.57544  1.80113 -2.23530
H -2.83959  1.20719 -3.11107
H -3.46187  2.02183 -1.63754
H -2.14795  2.75175 -2.57004
H  0.33530 -1.70252  1.88299
H -4.30754 -0.96752  0.30828
N  1.73988 -1.16947 -0.46332
C  2.64550 -1.85034 -0.71050
C  3.78172 -2.68495 -1.05357
H  4.49448 -2.11611 -1.65775
H  4.28824 -3.03304 -0.14893
H  3.45328 -3.55519 -1.62896

```

$^1\mathbf{A}^+$

```

SCF (PBE1PBE) Energy = -687.560237308
Enthalpy 0K = -687.355771
Enthalpy 298K = -687.339750
Free Energy 298K = -687.401571
Lowest Frequency = 16.1291 cm-1
Second Frequency = 20.0299 cm-1

```

```

C  1.96698 -0.43900  1.42060
C  2.28196  0.75471  0.69522
C  2.27935  0.74518 -0.71203
C  1.96267 -0.45796 -1.42083
C  1.67580 -1.63629 -0.70647
C  1.67823 -1.62714  0.72339
Ru  0.35899 -0.01410  0.00000

```

## XYZ Coordinates and Computed Energies

```
O -0.79700 1.36974 -1.07893
C -1.25493 1.87090 -0.00011
C -2.27691 2.94973 -0.00016
H 2.41901 1.67101 -1.25970
H 1.36841 -2.51069 1.27059
O -0.79672 1.37012 1.07874
H -3.27440 2.49792 -0.00006
H -2.17933 3.56119 0.89804
H -2.17943 3.56101 -0.89850
H 1.88077 -0.40840 2.50139
H 1.36358 -2.52685 -1.24086
H 1.87386 -0.44201 -2.50169
H 2.42417 1.68758 1.23008
N -1.34642 -1.14607 0.00035
C -2.33741 -1.73768 0.00028
C -3.57978 -2.48148 0.00008
H -4.14611 -2.25378 0.90742
H -4.17516 -2.20462 -0.87440
H -3.37225 -3.55442 -0.03303
```

**<sup>1</sup>B<sup>+</sup>** (t-O,t-N)

```
SCF (PBE1PBE) Energy = -1166.36074779
Enthalpy 0K = -1165.983792
Enthalpy 298K = -1165.957420
Free Energy 298K = -1166.041172
Lowest Frequency = 25.5551 cm-1
Second Frequency = 28.0283 cm-1
```

```
Ru 0.39104 -0.31483 -0.30649
O 1.46409 -2.10309 -0.79255
C 1.36847 -1.82076 -2.02572
C 1.92629 -2.69827 -3.09198
C 0.55503 -1.04828 1.92525
C 1.89523 -1.24240 2.35911
C 2.62158 -0.18605 2.85238
C 2.04904 1.10602 2.93007
O 0.73813 -0.74430 -2.32332
H 2.38662 -2.09120 -3.87422
H 2.64846 -3.39718 -2.66964
H 1.11078 -3.26503 -3.55288
C -2.63205 -0.06951 -0.00466
C -3.81469 -0.21635 0.72493
C -1.84589 -1.21014 -0.24873
C -4.20424 -1.47206 1.18304
H -4.41887 0.65285 0.96678
C -2.23942 -2.46771 0.20736
C -3.42100 -2.59777 0.93072
H -5.12431 -1.57077 1.75075
H -1.62945 -3.33723 -0.01916
H -3.73596 -3.57220 1.29007
H -1.09737 -1.19202 -1.08211
C 0.75634 1.31674 2.51508
C -0.01757 0.23933 2.00277
H -1.09379 0.35853 1.93957
H 2.62277 1.92291 3.35905
H -0.07637 -1.91991 1.78506
H 3.63198 -0.34720 3.21791
C -2.13878 1.24066 -0.45298
C -2.45464 3.51863 -1.16665
H -3.10613 4.35241 -1.40756
C -2.98686 2.30769 -0.74992
H -4.05981 2.16975 -0.67623
C -0.28244 2.53905 -0.98226
H 0.79625 2.57971 -1.06969
C -1.07330 3.63544 -1.28428
H -0.60746 4.55737 -1.61395
N -0.79117 1.36596 -0.57163
H 2.31960 -2.24074 2.32954
H 0.29579 2.29425 2.62592
N 2.11989 0.60187 -0.26876
```

## PBE1PBE Optimised Geometries and Energies

```
C 3.17702 1.06770 -0.30190
C 4.50592 1.64553 -0.32440
H 5.23718 0.90194 0.00477
H 4.76021 1.96751 -1.33794
H 4.55098 2.50808 0.34606
```

**TS (<sup>1</sup>B<sup>+</sup>-<sup>1</sup>C<sup>+</sup>)** (t-O,t-N)

```
SCF (PBE1PBE) Energy = -1166.32186597
Enthalpy 0K = -1165.950398
Enthalpy 298K = -1165.924475
Free Energy 298K = -1166.006272
Lowest Frequency = -1051.6454 cm-1
Second Frequency = 26.8299 cm-1
```

```
Ru 0.31193 -0.31890 -0.13686
O 1.00944 -2.37287 -0.40302
C 0.49657 -2.51692 -1.52412
C 0.75152 -3.66580 -2.42739
C 0.78173 -0.63216 2.06556
C 2.15011 -0.94520 2.32430
C 3.07847 0.05635 2.43915
C 2.69644 1.41705 2.30149
O -0.32551 -1.56628 -1.94917
H 1.15902 -3.29959 -3.37449
H 1.44490 -4.36725 -1.96518
H -0.19568 -4.16219 -2.65849
C -2.57482 0.22782 0.13319
C -3.89944 0.11876 0.56070
C -1.67831 -0.86449 0.26031
C -4.35622 -1.07842 1.10364
H -4.58043 0.96205 0.49228
C -2.17100 -2.05763 0.81034
C -3.49616 -2.16741 1.22829
H -5.38689 -1.15940 1.43471
H -1.50885 -2.91588 0.90893
H -3.85822 -3.09904 1.65304
H -1.02991 -1.27808 -1.02263
C 1.39129 1.74625 2.04851
C 0.40086 0.72391 1.91219
H -0.64372 0.99983 2.02284
H 3.43851 2.19812 2.44137
H 0.02733 -1.38473 2.27310
H 4.11077 -0.18667 2.67533
C -2.00129 1.45749 -0.41768
C -2.08187 3.70013 -1.29831
H -2.64735 4.57736 -1.59607
C -2.73329 2.58477 -0.79564
H -3.81321 2.57583 -0.70437
C -0.01783 2.52862 -1.03426
H 1.06039 2.45370 -1.10453
C -0.69490 3.67392 -1.41783
H -0.14096 4.52236 -1.80353
N -0.64636 1.44394 -0.55289
H 2.43374 -1.98211 2.47437
H 1.08388 2.78730 2.00703
N 2.22137 0.27353 -0.68995
C 3.29269 0.50836 -1.05821
C 4.64116 0.79666 -1.50635
H 5.03526 1.66627 -0.97347
H 5.28843 -0.06219 -1.30828
H 4.64713 1.00434 -2.57985
```

**<sup>1</sup>C<sup>+</sup>** (t-O,t-N)

```
SCF (PBE1PBE) Energy = -1166.33525988
Enthalpy 0K = -1165.958488
Enthalpy 298K = -1165.931789
Free Energy 298K = -1166.016940
Lowest Frequency = 13.6482 cm-1
```

## XYZ Coordinates and Computed Energies

## PBE1PBE Optimised Geometries and Energies

Second Frequency = 33.4685 cm<sup>-1</sup>

Ru -0.28427 0.15444 -0.14613  
 O -1.28885 2.05879 -0.39779  
 C -0.88987 2.98682 -1.11183  
 C -1.76146 4.13337 -1.49039  
 C -0.89101 0.56019 1.94911  
 C -2.30952 0.66677 2.13674  
 C -3.07463 -0.45534 2.27759  
 C -2.47638 -1.74976 2.25184  
 O 0.32746 3.04999 -1.60414  
 H -1.76033 4.25209 -2.57738  
 H -2.77427 3.97514 -1.12475  
 H -1.34947 5.05483 -1.06808  
 C 2.60435 -0.05280 -0.00323  
 C 3.94765 0.28719 0.17856  
 C 1.55540 0.86306 0.28799  
 C 4.28721 1.54046 0.67581  
 H 4.73886 -0.42068 -0.05247  
 C 1.93982 2.10616 0.81979  
 C 3.28210 2.44533 1.00554  
 H 5.33027 1.80384 0.81844  
 H 1.18130 2.83497 1.10403  
 H 3.54160 3.41813 1.41396  
 H 0.89388 2.37025 -1.17479  
 C -1.12904 -1.88836 2.07956  
 C -0.29533 -0.73070 1.91148  
 H 0.76678 -0.83178 2.11666  
 H -3.09721 -2.62570 2.41837  
 H -0.27472 1.42458 2.17753  
 H -4.14275 -0.36691 2.45476  
 C 2.16411 -1.37547 -0.44487  
 C 2.44709 -3.65553 -1.17727  
 H 3.09242 -4.48009 -1.46378  
 C 2.99558 -2.43559 -0.81351  
 H 4.07049 -2.29800 -0.81439  
 C 0.28205 -2.72675 -0.80313  
 H -0.79965 -2.78258 -0.77336  
 C 1.06235 -3.81012 -1.16759  
 H 0.59203 -4.74890 -1.43714  
 N 0.81074 -1.53929 -0.46178  
 H -2.75606 1.65332 2.20775  
 H -0.66328 -2.86799 2.13391  
 N -2.14199 -0.62661 -0.86648  
 C -3.14441 -0.94744 -1.34864  
 C -4.40755 -1.34773 -1.93811  
 H -5.13793 -0.54040 -1.83699  
 H -4.27357 -1.57355 -2.99954  
 H -4.79191 -2.23760 -1.43219

**<sup>1</sup>B<sup>+</sup>** (t-O,t-C6H6)

SCF (PBE1PBE) Energy = -1166.35216908  
 Enthalpy 0K = -1165.975289  
 Enthalpy 298K = -1165.948921  
 Free Energy 298K = -1166.032274  
 Lowest Frequency = 33.3282 cm<sup>-1</sup>  
 Second Frequency = 33.9038 cm<sup>-1</sup>

Ru 0.43522 0.01153 -0.15209  
 O 1.82137 -1.54517 -0.51651  
 C 2.01154 -1.13719 -1.70359  
 C 2.95632 -1.82207 -2.63053  
 C 1.77701 1.31323 1.29742  
 C 2.53120 0.50672 2.19572  
 C 3.74137 -0.01730 1.81489  
 C 4.26788 0.26606 0.53534  
 O 1.36502 -0.09380 -2.06549  
 H 3.96334 -1.42686 -2.46102  
 H 2.97786 -2.89377 -2.42622  
 H 2.68124 -1.62928 -3.66824

C -2.49507 -0.41665 -0.52891  
 C -3.66632 -1.03743 -0.09253  
 C -1.40661 -1.22142 -0.91398  
 C -3.74281 -2.42806 -0.04950  
 H -4.50978 -0.44267 0.24524  
 C -1.48073 -2.61410 -0.85702  
 C -2.65466 -3.21879 -0.42159  
 H -4.66046 -2.90034 0.28866  
 H -0.62588 -3.20982 -1.16027  
 H -2.72867 -4.30076 -0.37832  
 H -0.61982 -0.77075 -1.56760  
 C 3.56330 1.04617 -0.35033  
 C 2.29666 1.56690 0.01199  
 H 1.85424 2.30816 -0.64456  
 H 5.24655 -0.11876 0.26373  
 H 0.96501 1.91484 1.69596  
 H 4.31404 -0.62548 2.50809  
 C -2.31649 1.04201 -0.51388  
 C -3.15400 3.29542 -0.66052  
 H -3.97142 3.99387 -0.80760  
 C -3.37942 1.92769 -0.69234  
 H -4.37200 1.53332 -0.87980  
 C -0.84327 2.81734 -0.28226  
 H 0.17425 3.14645 -0.11185  
 C -1.85680 3.74793 -0.44592  
 H -1.62121 4.80573 -0.41040  
 N -1.04664 1.49013 -0.31810  
 H 2.15290 0.33671 3.19884  
 H 3.97498 1.29428 -1.32335  
 N -0.32765 -0.46178 1.62667  
 C -0.77970 -0.83196 2.62485  
 C -1.33345 -1.32519 3.87122  
 H -0.71881 -2.14542 4.25286  
 H -1.36314 -0.52642 4.61718  
 H -2.34968 -1.69306 3.70565

TS (<sup>1</sup>B<sup>+</sup>-<sup>1</sup>C<sup>+</sup>) (t-O,t-C6H6)

SCF (PBE1PBE) Energy = -1166.32433074  
 Enthalpy 0K = -1165.952882  
 Enthalpy 298K = -1165.926782  
 Free Energy 298K = -1166.009629  
 Lowest Frequency = -1178.8908 cm<sup>-1</sup>  
 Second Frequency = 18.9449 cm<sup>-1</sup>

Ru -0.34843 -0.01512 0.05354  
 O -1.75995 1.60643 0.19156  
 C -1.69430 1.92472 -1.01030  
 C -2.57589 2.92918 -1.65623  
 C -2.11227 -1.73186 0.52004  
 C -3.10429 -1.17873 1.35831  
 C -4.15903 -0.46867 0.81843  
 C -4.25634 -0.30106 -0.57205  
 O -0.78089 1.32294 -1.74978  
 H -3.12826 2.45374 -2.47179  
 H -3.26946 3.35008 -0.92924  
 H -1.96362 3.71861 -2.10204  
 C 2.48000 0.64325 -0.38034  
 C 3.69548 1.32129 -0.27735  
 C 1.26884 1.28952 -0.02786  
 C 3.72211 2.63758 0.17469  
 H 4.63178 0.82991 -0.52412  
 C 1.32612 2.60797 0.44953  
 C 2.54232 3.28008 0.54485  
 H 4.67108 3.15958 0.24937  
 H 0.40757 3.11200 0.73888  
 H 2.57177 4.30267 0.90920  
 H 0.26468 1.32872 -1.05236  
 C -3.28667 -0.82323 -1.40860  
 C -2.19826 -1.53670 -0.86940

## XYZ Coordinates and Computed Energies

```

H -1.53014 -2.05168 -1.55250
H -5.10808 0.22705 -0.99120
H -1.40077 -2.43484 0.94299
H -4.92645 -0.05845 1.46728
C 2.36961 -0.76776 -0.75252
C 3.23941 -2.88351 -1.51661
H 4.05379 -3.48357 -1.90971
C 3.42260 -1.53561 -1.25419
H 4.38229 -1.06812 -1.44099
C 0.98297 -2.63621 -0.77899
H 0.00362 -3.04875 -0.56933
C 1.99491 -3.45024 -1.25960
H 1.80039 -4.50300 -1.43080
N 1.14185 -1.32273 -0.54745
H -3.04992 -1.34380 2.43004
H -3.37089 -0.71698 -2.48593
N 0.10901 -0.40946 1.90527
C 0.41692 -0.57315 3.00868
C 0.79161 -0.75203 4.39836
H 0.79160 -1.81370 4.65978
H 1.79237 -0.34566 4.56897
H 0.08348 -0.22717 5.04582

```

**<sup>1</sup>C\*** (t-O,t-C6H6)

```

SCF (PBE1PBE) Energy = -1166.36378221
Enthalpy 0K = -1165.986536
Enthalpy 298K = -1165.959860
Free Energy 298K = -1166.044786
Lowest Frequency = 20.0576 cm-1
Second Frequency = 28.1597 cm-1

```

```

Ru -0.28975 -0.37428 0.28703
O -2.31423 0.27746 0.54412
C -2.74399 1.40845 0.78466
C -4.15419 1.65849 1.19305
C -1.72349 -3.01042 0.04692
C -3.03233 -2.69288 -0.26107
C -3.32313 -1.81419 -1.32141
C -2.29932 -1.23542 -2.04257
O -2.00829 2.49617 0.68929
H -4.67571 0.71388 1.33512
H -4.17598 2.24878 2.11293
H -4.65516 2.24982 0.42052
C 1.89880 0.88997 -1.12181
C 2.57185 1.77369 -1.97318
C 0.48961 0.93561 -0.98795
C 1.86007 2.70525 -2.71659
H 3.65339 1.73047 -2.06955
C -0.20910 1.85365 -1.78416
C 0.46948 2.73286 -2.63025
H 2.38216 3.39131 -3.37540
H -1.29653 1.87277 -1.77930
H -0.09639 3.43764 -3.23350
H -1.12475 2.25487 0.34666
C -0.94910 -1.51678 -1.72616
C -0.65810 -2.43581 -0.69358
H 0.33259 -2.87404 -0.62699
H -2.52025 -0.58131 -2.88109
H -1.50679 -3.74653 0.81588
H -4.35701 -1.60922 -1.58194
C 2.54781 -0.17294 -0.36714
C 4.39528 -1.48946 0.44685
H 5.46045 -1.69269 0.49647
C 3.92125 -0.42765 -0.30578
H 4.60938 0.21040 -0.84841
C 2.14041 -1.98999 1.04376
H 1.39125 -2.57571 1.56887
C 3.48812 -2.28960 1.14076
H 3.81349 -3.12896 1.74472

```

## PBE1PBE Optimised Geometries and Energies

```

N 1.67532 -0.96818 0.30710
H -3.84421 -3.15262 0.29478
H -0.16816 -1.20136 -2.41026
N 0.21621 0.78080 1.81193
C 0.56837 1.40723 2.72169
C 0.99805 2.18848 3.86441
H 0.40221 3.10260 3.93923
H 0.87490 1.60862 4.78367
H 2.05137 2.46105 3.75511

```

**<sup>1</sup>B\*** (t-O,t-O)

```

SCF (PBE1PBE) Energy = -1166.35750361
Enthalpy 0K = -1165.980583
Enthalpy 298K = -1165.954069
Free Energy 298K = -1166.038766
Lowest Frequency = 25.3136 cm-1
Second Frequency = 27.3551 cm-1

```

```

Ru -0.46834 0.25045 0.19771
O -2.12002 1.16829 -0.63057
C -2.90705 0.63782 0.23422
C -4.36911 0.92131 0.21690
C -0.92156 -1.22150 -1.80707
C -0.37527 -2.03030 -0.79787
C -1.21267 -2.91320 -0.07662
C -2.55405 -2.99350 -0.37878
O -2.37309 -0.13852 1.07779
H -4.74951 0.98652 1.23795
H -4.57782 1.83952 -0.33317
H -4.88173 0.09080 -0.27847
C 2.51943 -0.61975 0.29446
C 3.56042 -1.54920 0.19923
C 1.52271 -0.83537 1.26176
C 3.61128 -2.64515 1.05582
H 4.31827 -1.44128 -0.57057
C 1.57066 -1.93278 2.11702
C 2.62012 -2.84186 2.01537
H 4.42566 -3.35703 0.96388
H 0.79404 -2.06368 2.86424
H 2.66695 -3.69801 2.68090
H 0.80317 -0.03331 1.56388
C -3.09417 -2.20462 -1.41299
C -2.29589 -1.32694 -2.11642
H -2.70892 -0.73161 -2.92409
H -3.19451 -3.68272 0.16278
H -0.27122 -0.65813 -2.46907
H -0.78065 -3.54861 0.69019
C 2.39187 0.49433 -0.65823
C 3.27592 2.07675 -2.24548
H 4.11688 2.51755 -2.77129
C 3.48007 1.05359 -1.33163
H 4.48107 0.69493 -1.12020
C 0.94069 1.95134 -1.76069
H -0.09111 2.26768 -1.88279
C 1.97913 2.53163 -2.46994
H 1.76956 3.32717 -3.17621
N 1.13722 0.95716 -0.87790
H 0.69930 -2.13994 -0.71451
H -4.14482 -2.30687 -1.67044
N -0.37789 1.85859 1.33889
C -0.38415 2.80639 2.00158
C -0.39732 3.98908 2.83919
H -0.93505 4.79654 2.33462
H -0.89531 3.76799 3.78738
H 0.62609 4.31601 3.04219

```

**<sup>1</sup>B\*** (t-C6H6,t-O)

```

SCF (PBE1PBE) Energy = -1166.36191943
Enthalpy 0K = -1165.984679

```

## XYZ Coordinates and Computed Energies

Enthalpy 298K = -1165.958095  
 Free Energy 298K = -1166.043075  
 Lowest Frequency = 14.4552 cm<sup>-1</sup>  
 Second Frequency = 29.1331 cm<sup>-1</sup>

Ru -0.30239 -0.16181 0.19261  
 O -1.28405 -1.89352 0.73504  
 C -1.75124 -2.04033 -0.45113  
 C -2.64146 -3.18114 -0.79764  
 C -2.25392 0.81131 1.31982  
 C -1.84868 1.70803 0.31264  
 C -2.64809 1.84517 -0.84961  
 C -3.79378 1.09882 -1.00161  
 O -1.41596 -1.15445 -1.29434  
 H -2.41754 -3.53824 -1.80473  
 H -2.53878 -3.98611 -0.06890  
 H -3.67859 -2.83155 -0.78891  
 C 1.92968 0.89225 -0.91969  
 C 2.66502 1.94414 -0.34642  
 C 0.81998 1.18061 -1.74297  
 C 2.29238 3.25796 -0.57451  
 H 3.52647 1.71550 0.27460  
 C 0.47844 2.52178 -1.98460  
 C 1.19436 3.54976 -1.39459  
 H 2.86482 4.06675 -0.13025  
 H -0.33116 2.74475 -2.67175  
 H 0.92691 4.58330 -1.59198  
 H 0.34842 0.39265 -2.32412  
 C -4.19652 0.20265 0.00937  
 C -3.44665 0.06581 1.15599  
 H -3.77309 -0.59228 1.95474  
 H -4.40703 1.21912 -1.88939  
 H -1.78756 0.83524 2.29842  
 H -2.37047 2.57254 -1.60490  
 C 2.33636 -0.51716 -0.72790  
 C 3.82097 -2.39173 -0.76287  
 H 4.79455 -2.82735 -0.96427  
 C 3.59912 -1.03537 -0.98357  
 H 4.37904 -0.38604 -1.36690  
 C 1.54570 -2.59514 -0.03559  
 H 0.70602 -3.14843 0.36955  
 C 2.77906 -3.18127 -0.28639  
 H 2.91439 -4.24096 -0.10060  
 N 1.33907 -1.29039 -0.25628  
 H -1.07150 2.44178 0.51191  
 H -5.12279 -0.35353 -0.10504  
 N 0.61328 0.42355 1.85721  
 C 1.12476 0.71169 2.85556  
 C 1.75097 1.06086 4.11650  
 H 1.45382 0.34811 4.89106  
 H 2.83956 1.03922 4.01640  
 H 1.44450 2.06468 4.42339

TS (<sup>1</sup>B<sup>+</sup>-<sup>1</sup>C<sup>+</sup>)1 (t-C6H6,t-O)

SCF (PBE1PBE) Energy = -1166.33033028  
 Enthalpy 0K = -1165.954147  
 Enthalpy 298K = -1165.927914  
 Free Energy 298K = -1166.013100  
 Lowest Frequency = -71.6655 cm<sup>-1</sup>  
 Second Frequency = 12.6476 cm<sup>-1</sup>

C 2.90042 -0.15729 -0.27127  
 N 1.73054 0.47644 -0.09545  
 C 1.69092 1.82645 -0.04835  
 C 2.86067 2.57719 -0.14018  
 C 4.07626 1.92569 -0.30163  
 C 4.09548 0.53560 -0.37936  
 Ru -0.03424 -0.49735 0.21943  
 C -2.83272 -1.63376 -0.88202  
 C -1.95410 -1.96095 0.17505

## PBE1PBE Optimised Geometries and Energies

C -2.07286 -1.27617 1.40168  
 C -3.08096 -0.30159 1.57072  
 C -3.95595 -0.02975 0.53722  
 C -3.82441 -0.68868 -0.69710  
 H -1.54146 -1.63197 2.27847  
 C 0.34302 2.40514 0.05306  
 C 0.09566 3.59503 0.74309  
 C -1.18509 4.13665 0.75843  
 C -2.22688 3.50537 0.07888  
 C -1.99258 2.31523 -0.60115  
 C -0.72030 1.74158 -0.59850  
 H -4.51986 -0.47130 -1.50246  
 O 0.63984 -1.87578 -1.06904  
 C 0.37532 -1.58008 -2.31813  
 O -0.22395 -0.56193 -2.65463  
 C 0.83734 -2.61836 -3.30492  
 H 0.04209 -3.35875 -3.44026  
 H 1.02742 -2.14478 -4.26875  
 H 1.72659 -3.14191 -2.95011  
 H 0.90211 4.09279 1.27368  
 H -1.36975 5.06228 1.29495  
 H -2.78816 1.83292 -1.15721  
 H -3.21696 3.95069 0.07172  
 H 2.80277 3.65975 -0.11681  
 H -0.51836 0.92126 -1.32895  
 H -2.75323 -2.16239 -1.82621  
 H -4.75630 0.69042 0.68044  
 H -1.32730 -2.84289 0.09065  
 H -3.19516 0.18913 2.53237  
 H 5.02061 -0.01000 -0.52778  
 H 4.99595 2.49610 -0.38481  
 H 2.84120 -1.23791 -0.33439  
 N 0.79934 -1.61437 1.56934  
 C 1.33470 -2.28338 2.34792  
 C 2.00027 -3.12158 3.32602  
 H 1.27818 -3.47907 4.06545  
 H 2.45402 -3.98445 2.83040  
 H 2.78069 -2.55355 3.84001

INT (<sup>1</sup>B<sup>+</sup>-<sup>1</sup>C<sup>+</sup>) (t-C6H6,t-O)

SCF (PBE1PBE) Energy = -1166.35673734  
 Enthalpy 0K = -1165.979847  
 Enthalpy 298K = -1165.953456  
 Free Energy 298K = -1166.037100  
 Lowest Frequency = 28.7446 cm<sup>-1</sup>  
 Second Frequency = 29.2028 cm<sup>-1</sup>

C 0.59278 -2.79009 0.03489  
 N -0.11909 -1.66261 0.19988  
 C -1.42568 -1.75853 0.55942  
 C -2.02035 -3.00671 0.75526  
 C -1.28303 -4.16581 0.57186  
 C 0.05372 -4.05416 0.20268  
 Ru 0.75963 0.21092 0.10817  
 C -0.47791 2.46570 -1.89210  
 C 0.43668 1.38356 -1.93581  
 C -0.04163 0.07949 -2.18823  
 C -1.42838 -0.11908 -2.41120  
 C -2.29708 0.94649 -2.37511  
 C -1.81818 2.24721 -2.11063  
 H 0.64516 -0.71355 -2.46750  
 C -2.15382 -0.49668 0.74713  
 C -3.54383 -0.40885 0.62887  
 C -4.18657 0.81305 0.79675  
 C -3.45746 1.97081 1.06641  
 C -2.07310 1.90154 1.17799  
 C -1.42879 0.67604 1.01845  
 H -2.51256 3.08209 -2.10496  
 O 1.70516 0.20560 1.97275

## XYZ Coordinates and Computed Energies

```

C 2.10910 1.41284 1.81656
O 1.77350 1.99097 0.73843
C 2.90468 2.09406 2.87538
H 2.23324 2.40639 3.68186
H 3.63186 1.40111 3.30335
H 3.40156 2.97535 2.46923
H -4.12907 -1.28815 0.37831
H -5.26776 0.86335 0.70999
H -1.49018 2.78691 1.41110
H -3.96904 2.91867 1.20070
H -3.05414 -3.05749 1.07719
H -0.41880 0.59906 1.49699
H -0.09944 3.46937 -1.72593
H -3.35368 0.79385 -2.57233
H 1.49550 1.61051 -2.01202
H -1.78916 -1.11295 -2.65978
H 0.67886 -4.92787 0.05637
H -1.73839 -5.13842 0.72801
H 1.63268 -2.65520 -0.23642
N 2.46780 -0.34975 -0.69106
C 3.51749 -0.59583 -1.11211
C 4.83519 -0.90205 -1.63358
H 4.75009 -1.46990 -2.56414
H 5.37918 0.02550 -1.83314
H 5.39713 -1.49283 -0.90477

```

TS (<sup>1</sup>B<sup>+</sup>-<sup>1</sup>C<sup>+</sup>)<sub>2</sub> (t-C<sub>6</sub>H<sub>6</sub>,t-O)

SCF (PBE1PBE) Energy = -1166.32241687  
 Enthalpy 0K = -1165.950784  
 Enthalpy 298K = -1165.924429  
 Free Energy 298K = -1166.009205  
 Lowest Frequency = -613.9506 cm<sup>-1</sup>  
 Second Frequency = 18.5132 cm<sup>-1</sup>

```

C 0.59285 -2.79012 0.03441
N -0.11906 -1.66269 0.19958
C -1.42563 -1.75872 0.55919
C -2.02023 -3.00694 0.75495
C -1.28286 -4.16599 0.57138
C 0.05386 -4.05423 0.20210
Ru 0.75957 0.21090 0.10820
C -0.47761 2.46612 -1.89178
C 0.43683 1.38385 -1.93560
C -0.04166 0.07987 -2.18817
C -1.42845 -0.11848 -2.41115
C -2.29699 0.94721 -2.37495
C -1.81790 2.24784 -2.11034
H 0.64503 -0.71321 -2.46757
C -2.15381 -0.49691 0.74705
C -3.54381 -0.40911 0.62876
C -4.18658 0.81276 0.79671
C -3.45750 1.97052 1.06645
C -2.07314 1.90127 1.17807
C -1.42880 0.67579 1.01849
H -2.51217 3.08282 -2.10460
O 1.70499 0.20524 1.97283
C 2.10895 1.41250 1.81688
O 1.77343 1.99084 0.73884
C 2.90443 2.09353 2.87591
H 2.23276 2.40652 3.68196
H 3.63099 1.40029 3.30443
H 3.40199 2.97445 2.46978
H -4.12902 -1.28842 0.37812
H -5.26777 0.86305 0.70992
H -1.49024 2.78663 1.41128
H -3.96910 2.91836 1.20078
H -3.05399 -3.05780 1.07693
H -0.41884 0.59880 1.49706
H -0.09900 3.46972 -1.72550
H -3.35361 0.79475 -2.57219

```

## PBE1PBE Optimised Geometries and Energies

```

H 1.49567 1.61067 -2.01182
H -1.78936 -1.11226 -2.65985
H 0.67902 -4.92789 0.05564
H -1.73816 -5.13864 0.72746
H 1.63271 -2.65516 -0.23697
N 2.46777 -0.34959 -0.69111
C 3.51745 -0.59558 -1.11221
C 4.83516 -0.90167 -1.63375
H 4.75009 -1.47035 -2.56380
H 5.37871 0.02594 -1.83422
H 5.39752 -1.49160 -0.90457

```

<sup>1</sup>C<sup>+</sup> (t-C<sub>6</sub>H<sub>6</sub>,t-O)

SCF (PBE1PBE) Energy = -1166.34557397  
 Enthalpy 0K = -1165.969282  
 Enthalpy 298K = -1165.942413  
 Free Energy 298K = -1166.028603  
 Lowest Frequency = 17.3483 cm<sup>-1</sup>  
 Second Frequency = 22.1878 cm<sup>-1</sup>

```

C -1.20686 -0.71112 2.26599
N -0.26322 -0.53056 1.32699
C 1.01652 -0.94184 1.55587
C 1.34319 -1.53442 2.77935
C 0.37249 -1.71231 3.75055
C -0.93256 -1.29733 3.48855
Ru -0.64592 0.32091 -0.44414
C 0.77916 3.04778 -1.29822
C -0.38467 2.61848 -0.61435
C -0.31430 2.31754 0.76840
C 0.93057 2.44786 1.43436
C 2.05556 2.84410 0.74493
C 1.97965 3.14768 -0.62830
H -1.22029 2.25108 1.36301
C 1.91960 -0.71957 0.43594
C 3.27025 -1.08309 0.43102
C 4.03850 -0.86943 -0.70669
C 3.45314 -0.29994 -1.83686
C 2.10781 0.07542 -1.82562
C 1.30146 -0.10953 -0.68881
H 2.86823 3.48396 -1.15359
O -1.38122 -1.52760 -1.12698
C -0.84135 -2.52088 -1.64282
O 0.43461 -2.62077 -1.88338
C -1.64338 -3.71034 -2.04685
H -1.25867 -4.59793 -1.53689
H -2.69345 -3.56042 -1.80362
H -1.52431 -3.88026 -3.12074
H 3.72896 -1.54058 1.30362
H 5.08512 -1.15621 -0.71828
H 1.68408 0.53022 -2.71928
H 4.04836 -0.14374 -2.73256
H 2.36317 -1.85533 2.95728
H 0.90060 -1.79445 -1.60060
H 0.70908 3.32783 -2.34521
H 3.00183 2.95153 1.26613
H -1.35494 2.77974 -1.08308
H 0.98024 2.27267 2.50512
H -1.72770 -1.42348 4.21451
H 0.62576 -2.17249 4.70043
H -2.20096 -0.36888 2.00397
N -2.75333 0.73989 -0.22964
C -3.89394 0.94282 -0.23882
C -5.32285 1.19081 -0.25605
H -5.56450 2.04449 0.38281
H -5.65029 1.40780 -1.27661
H -5.85928 0.31021 0.10762

```

<sup>1</sup>B<sup>+</sup> (t-N,t-O)

SCF (PBE1PBE) Energy = -1166.36111494

## XYZ Coordinates and Computed Energies

## PBE1PBE Optimised Geometries and Energies

Enthalpy 0K = -1165.983953  
 Enthalpy 298K = -1165.957420  
 Free Energy 298K = -1166.042056  
 Lowest Frequency = 21.3440 cm<sup>-1</sup>  
 Second Frequency = 23.5493 cm<sup>-1</sup>

Ru -0.62030 -0.25093 -0.02920  
 O -1.13539 -2.25860 -0.00870  
 C -1.42485 -2.23619 -1.25382  
 C -1.95030 -3.43848 -1.95496  
 C -0.52044 -0.54601 2.26582  
 C 0.33730 -1.61133 2.66291  
 C 1.68079 -1.39494 2.83372  
 C 2.22377 -0.09947 2.65348  
 O -1.25812 -1.12364 -1.84590  
 H -1.60459 -3.44990 -2.99008  
 H -1.64634 -4.34745 -1.43412  
 H -3.04444 -3.39590 -1.96504  
 C 1.16728 1.66999 -0.94098  
 C 1.63914 2.83116 -0.31296  
 C -0.12193 1.67226 -1.52235  
 C 0.82419 3.94820 -0.20305  
 H 2.64182 2.84270 0.10404  
 C -0.93784 2.81010 -1.38648  
 C -0.47933 3.93013 -0.71225  
 H 1.20016 4.84159 0.28679  
 H -1.91570 2.81558 -1.85849  
 H -1.11037 4.80820 -0.61616  
 H -0.39611 0.90930 -2.24471  
 C 1.41362 0.94337 2.28258  
 C 0.02374 0.74043 2.04108  
 H -0.62605 1.61027 1.98265  
 H 3.27678 0.07363 2.85524  
 H -1.58873 -0.67726 2.40187  
 H 2.32652 -2.20636 3.15719  
 C 1.98683 0.43886 -0.97850  
 C 3.97226 -0.84874 -1.34383  
 H 5.00960 -0.92384 -1.65452  
 C 3.31968 0.38004 -1.36666  
 H 3.82235 1.28148 -1.70076  
 C 1.95061 -1.84478 -0.53431  
 H 1.36194 -2.68328 -0.17864  
 C 3.27605 -1.97787 -0.92548  
 H 3.74879 -2.95332 -0.89581  
 N 1.32512 -0.66158 -0.55870  
 H -0.09663 -2.58638 2.85999  
 H 1.81509 1.94847 2.21593  
 N -2.54060 0.25696 0.33068  
 C -3.65616 0.51060 0.50216  
 C -5.05427 0.83448 0.71058  
 H -5.14407 1.78116 1.25028  
 H -5.56370 0.92481 -0.25278  
 H -5.53782 0.04666 1.29460

TS (<sup>1</sup>B<sup>+</sup>-<sup>1</sup>C<sup>+</sup>) (t-N,t-O)

SCF (PBE1PBE) Energy = -1166.33052596  
 Enthalpy 0K = -1165.954992  
 Enthalpy 298K = -1165.928942  
 Free Energy 298K = -1166.012635  
 Lowest Frequency = -94.6243 cm<sup>-1</sup>  
 Second Frequency = 24.6145 cm<sup>-1</sup>

C -1.94954 -1.84612 0.53363  
 N -1.32470 -0.66259 0.55845  
 C -1.98705 0.43733 0.97861  
 C -3.31989 0.37763 1.36667  
 C -3.97179 -0.85150 1.34337  
 C -3.27492 -1.98010 0.92466  
 Ru 0.62056 -0.25087 0.02915  
 C 0.52024 -0.54598 -2.26586

C -0.33840 -1.61055 -2.66300  
 C -1.68170 -1.39297 -2.83385  
 C -2.22357 -0.09705 -2.65358  
 C -1.41251 0.94511 -2.28270  
 C -0.02283 0.74094 -2.04117  
 H -2.32814 -2.20382 -3.15735  
 C -1.16823 1.66896 0.94165  
 C -1.64083 2.83014 0.31422  
 C -0.82659 3.94776 0.20488  
 C 0.47695 3.93025 0.71401  
 C 0.93620 2.81014 1.38763  
 C 0.12100 1.67174 1.52295  
 H 0.62772 1.61020 -1.98273  
 O 1.13658 -2.25827 0.00812  
 C 1.42611 -2.23605 1.25325  
 O 1.25879 -1.12375 1.84561  
 C 1.95249 -3.43822 1.95386  
 H 1.61546 -3.44509 2.99184  
 H 1.64055 -4.34755 1.43832  
 H 3.04686 -3.40040 1.95405  
 H -2.64351 2.84123 -0.10281  
 H -1.20315 4.84116 -0.28449  
 H 1.91409 2.81599 1.85958  
 H 1.10742 4.80877 0.61837  
 H -3.82307 1.27868 1.70107  
 H 0.39571 0.90857 2.24489  
 H 1.58844 -0.67820 -2.40176  
 H -1.81307 1.95057 -2.21603  
 H 0.09470 -2.58596 -2.86011  
 H -3.27643 0.07695 -2.85535  
 H -3.74712 -2.95580 0.89464  
 H -5.00911 -0.92728 1.65397  
 H -1.36037 -2.68417 0.17772  
 N 2.54058 0.25795 -0.33083  
 C 3.65597 0.51219 -0.50248  
 C 5.05389 0.83683 -0.71107  
 H 5.56454 0.92233 0.25209  
 H 5.53656 0.05180 -1.29956  
 H 5.14319 1.78614 -1.24621

<sup>1</sup>C<sup>+</sup> (t-N,t-O)

SCF (PBE1PBE) Energy = -1166.36897227  
 Enthalpy 0K = -1165.991888  
 Enthalpy 298K = -1165.965359  
 Free Energy 298K = -1166.049825  
 Lowest Frequency = 22.1906 cm<sup>-1</sup>  
 Second Frequency = 30.2200 cm<sup>-1</sup>

C -2.17624 0.11099 -1.82261  
 N -1.40916 -0.19100 -0.76555  
 C -1.81713 -1.14738 0.10819  
 C -3.04285 -1.79246 -0.07330  
 C -3.83886 -1.46675 -1.16035  
 C -3.39573 -0.50079 -2.06117  
 Ru 0.47457 0.57938 -0.42299  
 C -1.32642 3.14018 -0.59770  
 C -2.53416 2.83894 -0.00874  
 C -2.57671 2.15911 1.22847  
 C -1.41136 1.79364 1.86129  
 C -0.14857 2.06953 1.26794  
 C -0.11059 2.75275 0.02727  
 H -3.53550 1.95800 1.69675  
 C -0.85737 -1.41547 1.17608  
 C -1.06663 -2.34265 2.20214  
 C -0.09652 -2.54496 3.17633  
 C 1.08978 -1.81636 3.12834  
 C 1.30839 -0.88329 2.11192  
 C 0.34774 -0.66625 1.11240  
 H 0.81418 3.21863 -0.30695  
 O 1.15392 -0.80550 -1.82732



## XYZ Coordinates and Computed Energies

```

C 1.72900 -1.89964 -1.73378
O 1.98279 -2.48767 -0.59501
C 2.17872 -2.65034 -2.93878
H 1.61686 -3.58677 -3.00777
H 2.01934 -2.05567 -3.83639
H 3.23408 -2.91567 -2.83596
H -1.99051 -2.91255 2.24841
H -0.26408 -3.26708 3.96870
H 2.23460 -0.31478 2.10434
H 1.85123 -1.96961 3.88817
H -3.36251 -2.55202 0.63083
H 1.61210 -1.95800 0.14971
H -1.29115 3.71636 -1.51807
H 0.73963 2.00264 1.88817
H -3.46120 3.15338 -0.47932
H -1.44237 1.32004 2.83770
H -3.97891 -0.22336 -2.93192
H -4.79111 -1.96607 -1.30997
H -1.78688 0.87259 -2.49012
N 2.37179 1.17432 -0.11967
C 3.47121 1.52293 0.00030
C 4.84930 1.94964 0.14996
H 5.48296 1.09372 0.39910
H 5.20740 2.39491 -0.78261
H 4.92854 2.69226 0.94875

```

**4G<sup>+</sup>** ( $\kappa^1$ )

```

SCF (PBE1PBE) Energy = -1332.25088697
Enthalpy 0K = -1331.833478
Enthalpy 298K = -1331.798055
Free Energy 298K = -1331.907619
Lowest Frequency = 5.3048 cm-1
Second Frequency = 21.2623 cm-1

```

```

N 2.02893 -1.83299 0.44990
C 2.82326 -2.66593 0.54248
N 1.33970 0.43353 2.00819
C 1.73169 0.86867 3.00399
C 2.23159 1.42183 4.24789
H 2.21907 0.65999 5.03189
H 3.25777 1.77395 4.11172
H 1.60722 2.26261 4.56189
C 3.83451 -3.70025 0.64994
H 3.56026 -4.56095 0.03422
H 4.79751 -3.31203 0.30720
H 3.93341 -4.02595 1.68881
O 1.52143 1.31702 -2.54149
C 2.45798 1.19583 -1.75944
C 3.85635 1.66098 -2.12040
H 4.53170 0.80122 -2.16986
H 3.84616 2.17180 -3.08336
H 4.24786 2.32891 -1.34810
O 2.39589 0.68877 -0.55565
N 0.33139 -1.01553 -1.59188
C 0.27459 -1.33945 -2.69703
C 0.23890 -1.61105 -4.11858
H -0.79041 -1.74866 -4.46009
H 0.67860 -0.74943 -4.63091
H 0.81492 -2.50869 -4.35655
N -0.42807 1.49419 0.04866
C 0.33144 2.60418 0.15288
C -1.76941 1.65904 -0.02200
C -0.17930 3.88933 0.20583
H 1.39874 2.42456 0.19385
C -2.34668 2.93190 0.04142
C -1.55543 4.06306 0.15700
H 0.50207 4.72967 0.28035
H -3.42616 3.00902 -0.02808
H -2.00222 5.05175 0.19566
C -2.70624 0.51995 -0.19454

```

## PBE1PBE Optimised Geometries and Energies

```

C -3.68651 0.28540 0.77632
C -2.73094 -0.22006 -1.37858
C -4.65472 -0.69572 0.57938
H -3.69110 0.88049 1.68596
C -3.69743 -1.20244 -1.57331
H -2.00755 0.00423 -2.15369
C -4.65817 -1.44690 -0.59489
H -5.42023 -0.85783 1.33352
H -3.71842 -1.76285 -2.50363
H -5.42234 -2.20131 -0.75765
Ru 0.75579 -0.29740 0.23106
N -0.67693 -1.39620 1.12240
C -1.41479 -2.11471 1.64770
C -2.35857 -3.00559 2.29443
H -3.37661 -2.69564 2.04446
H -2.20389 -4.03165 1.94985
H -2.22745 -2.97345 3.37938

```

**3G** ( $2\kappa^1$ )

```

SCF (PBE1PBE) Energy = -1428.05422601
Enthalpy 0K = -1427.633332
Enthalpy 298K = -1427.597391
Free Energy 298K = -1427.704417
Lowest Frequency = 23.0583 cm-1
Second Frequency = 27.5751 cm-1

```

```

N 0.83427 -0.78146 1.34441
C 1.67114 -1.25099 1.98839
N -1.53934 -1.97980 0.57506
C -1.98002 -3.03580 0.71965
C 2.74758 -1.89425 2.71380
H 2.99049 -2.83795 2.21613
H 3.63367 -1.25419 2.70973
H 2.45299 -2.09951 3.74656
C -2.42274 -4.41116 0.82333
H -2.60012 -4.68634 1.86625
H -3.34511 -4.56030 0.25583
H -1.63813 -5.05218 0.40968
O -3.70339 1.37756 -0.24867
C -3.33931 0.58359 -1.12791
O -2.18899 0.01767 -1.23584
C -4.29257 0.20730 -2.25257
H -3.79376 0.31450 -3.21932
H -4.57439 -0.84594 -2.15324
H -5.18993 0.82696 -2.21830
O 0.21058 -1.15845 -1.49151
C 0.66446 -2.36976 -1.51999
O 0.79948 -3.14426 -0.57143
C 1.05794 -2.80330 -2.92775
H 1.80825 -2.12196 -3.34281
H 1.45366 -3.82010 -2.91730
H 0.18640 -2.74989 -3.58688
N 0.16153 1.67347 -0.36076
C 1.44297 2.10772 -0.42926
C -0.81618 2.58777 -0.54433
C 1.74234 3.45179 -0.68283
C -0.57855 3.92809 -0.80816
H -1.83522 2.22454 -0.43890
C 0.73157 4.37787 -0.88142
H 2.78609 3.74059 -0.74257
H -1.42402 4.59329 -0.94741
H 0.96396 5.41823 -1.08998
C 2.60614 1.20355 -0.24484
C 2.83842 0.12405 -1.09946
C 3.55913 1.52043 0.73110
C 3.99492 -0.63809 -0.96242
H 2.09024 -0.12530 -1.84315
C 4.71545 0.75717 0.86548
H 3.38578 2.36634 1.39166
C 4.93575 -0.32594 0.01616

```

## XYZ Coordinates and Computed Energies

## PBE1PBE Optimised Geometries and Energies

H 4.16090 -1.48013 -1.62826  
H 5.44785 1.01511 1.62607  
H 5.84113 -0.91923 0.11230  
Ru -0.65882 -0.25538 0.15787  
N -1.63983 0.65361 1.62291  
C -2.34802 1.19809 2.35681  
C -3.36168 1.90444 3.11273  
H -3.78306 1.26501 3.89294  
H -2.94995 2.80418 3.57753  
H -4.15023 2.18446 2.40644

**<sup>1</sup>G** (2κ<sup>2</sup>) (\* single point)

SCF (PBE1PBE) Energy = -1162.83896901  
Enthalpy 0K = -1162.514404  
Enthalpy 298K = -1162.490651  
Free Energy 298K = -1162.564493  
Lowest Frequency = 60.7538 cm<sup>-1</sup>  
Second Frequency = 66.9756 cm<sup>-1</sup>

**<sup>2</sup>G<sup>+</sup>** (κ<sup>2</sup>)

SCF (PBE1PBE) Energy = -1067.02057468  
Enthalpy 0K = -1066.698783  
Enthalpy 298K = -1066.673445  
Free Energy 298K = -1066.756933  
Lowest Frequency = 21.4846 cm<sup>-1</sup>  
Second Frequency = 24.9027 cm<sup>-1</sup>

Ru 0.69207 -0.20568 0.10465  
N -0.23172 -1.66149 -0.91466  
C -0.70452 -2.52755 -1.51447  
C -1.29414 -3.61984 -2.26272  
H -2.38343 -3.58680 -2.17667  
H -1.01718 -3.54216 -3.31752  
H -0.93544 -4.57509 -1.86978  
O 2.18524 -1.63971 0.64660  
C 2.82340 -1.34701 -0.40662  
O 2.30496 -0.45362 -1.16702  
C 4.12972 -1.97797 -0.75006  
H 4.94037 -1.36380 -0.34447  
H 4.19678 -2.97045 -0.30276  
H 4.25440 -2.03034 -1.83271  
N -0.48510 1.24112 -0.75553  
C -1.78158 1.35939 -0.37932  
C 0.02193 2.07557 -1.67580  
C -2.58895 2.35751 -0.92715  
C -0.73444 3.07703 -2.26273  
H 1.06161 1.90518 -1.93770  
C -2.06403 3.22345 -1.87541  
H -3.61558 2.45960 -0.59373  
H -0.28417 3.72642 -3.00509  
H -2.68261 4.00506 -2.30497  
C -2.24620 0.37161 0.60321  
C -1.29292 -0.29571 1.39494  
C -3.58642 -0.00701 0.71191  
C -1.66969 -1.30718 2.27502  
H -0.28365 0.17338 1.61316  
C -3.96369 -1.01295 1.59721  
H -4.33819 0.45863 0.08177  
C -3.01055 -1.66789 2.37517  
H -0.91556 -1.79602 2.88389  
H -5.00971 -1.29393 1.67235  
H -3.31281 -2.45199 3.06225  
N 1.75375 1.19706 1.06445  
C 2.41939 1.97369 1.60343  
C 3.25590 2.93864 2.28889  
H 3.77024 2.45626 3.12473  
H 4.00095 3.34451 1.59918  
H 2.64361 3.75854 2.67394

**<sup>3</sup>G<sup>+</sup>** (κ<sup>2</sup>)

SCF (PBE1PBE) Energy = -1199.63056724  
Enthalpy 0K = -1199.261378  
Enthalpy 298K = -1199.230984  
Free Energy 298K = -1199.326460  
Lowest Frequency = 22.8672 cm<sup>-1</sup>  
Second Frequency = 23.7079 cm<sup>-1</sup>

N -1.45768 0.77925 -1.49304  
C -2.00518 1.05041 -2.47225  
N -1.78559 1.09404 1.29499  
C -2.57807 1.58568 1.97735  
C -3.58327 2.18465 2.83372  
H -4.13249 2.95620 2.28742  
H -4.28833 1.41677 3.16420  
H -3.11334 2.63746 3.71090  
C -2.69493 1.32124 -3.71673  
H -2.85641 0.37620 -4.24362  
H -3.66223 1.79048 -3.51949  
H -2.09713 1.98525 -4.34637  
O -1.46510 -2.10942 -1.78160  
C -2.10861 -2.19016 -0.73141  
C -3.16122 -3.25870 -0.53241  
H -4.05267 -2.84230 -0.05796  
H -3.41711 -3.71716 -1.48780  
H -2.76899 -4.03185 0.13616  
O -1.94929 -1.41596 0.29823  
N 0.92248 1.57337 -0.03628  
C 0.66755 2.87992 0.13585  
C 2.16018 1.18954 -0.43176  
C 1.62007 3.86483 -0.06583  
H -0.34191 3.12414 0.44729  
C 3.16062 2.13639 -0.66509  
C 2.89403 3.48388 -0.47818  
H 1.36075 4.90608 0.09009  
H 4.13279 1.80815 -1.01510  
H 3.66366 4.22688 -0.66181  
C 2.37549 -0.25557 -0.59282  
C 3.63418 -0.82784 -0.38517  
C 1.29138 -1.10471 -0.88253  
C 3.80915 -2.20525 -0.48003  
H 4.47830 -0.19992 -0.11606  
C 1.46764 -2.48366 -0.97551  
H 0.31613 -0.76533 -1.33279  
C 2.72968 -3.03547 -0.77481  
H 4.79495 -2.63111 -0.31850  
H 0.60908 -3.09107 -1.24162  
H 2.87374 -4.10829 -0.85843  
Ru -0.54130 0.08752 0.15776  
N 0.28399 -0.69648 1.80943  
C 0.70804 -1.21404 2.74996  
C 1.24005 -1.88246 3.92107  
H 2.05208 -2.55256 3.62634  
H 1.62528 -1.14915 4.63441  
H 0.45329 -2.46986 4.40207

**<sup>1</sup>G** (κ<sup>2</sup>κ<sup>1</sup>)

SCF (PBE1PBE) Energy = -1162.83828113  
Enthalpy 0K = -1162.513981  
Enthalpy 298K = -1162.488061  
Free Energy 298K = -1162.571908  
Lowest Frequency = 24.1761 cm<sup>-1</sup>  
Second Frequency = 27.9289 cm<sup>-1</sup>

Ru -0.67519 0.24271 -0.04359  
N 0.15957 1.87930 -0.79177  
C 0.60700 2.85267 -1.23097  
C 1.16559 4.07775 -1.77077  
H 2.21605 4.16960 -1.48118  
H 1.09968 4.07761 -2.86242

## XYZ Coordinates and Computed Energies

```

H 0.61904 4.94338 -1.38565
O -2.30679 1.44308 0.69448
C -2.92124 1.22331 -0.38860
O -2.31535 0.57694 -1.30767
C -4.33549 1.67123 -0.58825
H -5.00327 0.86100 -0.27835
H -4.54697 2.54660 0.02766
H -4.52368 1.88372 -1.64210
O -1.78517 -1.37745 0.54605
C -1.52135 -1.99398 1.65178
O -0.57631 -1.73700 2.40374
C -2.50924 -3.08894 1.99588
H -2.77020 -3.66716 1.10655
H -2.09893 -3.73929 2.76901
H -3.42949 -2.62954 2.37084
N 0.55594 -1.02787 -1.03121
C 1.85679 -1.12266 -0.65672
C 0.08160 -1.81864 -2.00584
C 2.71214 -2.02421 -1.29276
C 0.88495 -2.72863 -2.67321
H -0.97205 -1.68912 -2.23106
C 2.22675 -2.83087 -2.31098
H 3.74324 -2.10306 -0.96586
H 0.45994 -3.34667 -3.45642
H 2.88176 -3.53982 -2.80813
C 2.23459 -0.23308 0.44172
C 1.18093 0.30149 1.21549
C 3.55057 0.15996 0.69606
C 1.47319 1.19556 2.24793
H 0.21745 -0.34733 1.42128
C 3.82555 1.06118 1.71889
H 4.36206 -0.21382 0.07719
C 2.78703 1.58071 2.49307
H 0.66014 1.57175 2.86134
H 4.85138 1.36192 1.91121
H 3.00666 2.27930 3.29568

```

TS (<sup>1</sup>G-<sup>1</sup>H)

```

SCF (PBE1PBE) Energy = -1162.83441178
Enthalpy 0K = -1162.513996
Enthalpy 298K = -1162.488488
Free Energy 298K = -1162.571017
Lowest Frequency = -911.3780 cm-1
Second Frequency = 22.6032 cm-1

```

```

Ru -0.70124 0.13671 -0.08171
N -0.12756 1.87900 -0.79619
C 0.17744 2.91451 -1.21442
C 0.55507 4.21652 -1.73029
H 1.56430 4.47308 -1.39646
H 0.53555 4.21387 -2.82382
H -0.13828 4.98110 -1.36835
O -2.46556 1.06522 0.72331
C -3.09002 0.80980 -0.35070
O -2.45892 0.27482 -1.31567
C -4.55655 1.09884 -0.46947
H -5.11438 0.20661 -0.16713
H -4.83835 1.92030 0.19108
H -4.81675 1.32743 -1.50445
O -1.55275 -1.66249 0.50882
C -1.14403 -2.15419 1.60627
O -0.22025 -1.64086 2.28879
C -1.81921 -3.39905 2.11223
H -2.43065 -3.85444 1.33312
H -1.07099 -4.10565 2.47738
H -2.45858 -3.13063 2.95887
N 0.71257 -0.90253 -1.10220
C 2.00395 -0.82906 -0.68430
C 0.38931 -1.68512 -2.14287
C 2.99873 -1.55509 -1.34473

```

## PBE1PBE Optimised Geometries and Energies

```

C 1.33442 -2.42538 -2.83374
H -0.66418 -1.69102 -2.40490
C 2.66598 -2.35547 -2.42645
H 4.02257 -1.50108 -0.99106
H 1.02751 -3.04369 -3.67012
H 3.43255 -2.92636 -2.94181
C 2.20074 0.03603 0.47568
C 1.01489 0.42595 1.15080
C 3.44945 0.51864 0.87720
C 1.14476 1.29960 2.24090
H 0.16239 -0.55348 1.51008
C 3.54436 1.38687 1.95787
H 4.34899 0.24109 0.33300
C 2.38882 1.77848 2.63726
H 0.25006 1.58958 2.78602
H 4.51531 1.76123 2.26925
H 2.46396 2.45638 3.48378

```

<sup>1</sup>H

```

SCF (PBE1PBE) Energy = -1162.85048309
Enthalpy 0K = -1162.525200
Enthalpy 298K = -1162.498927
Free Energy 298K = -1162.584950
Lowest Frequency = 14.7306 cm-1
Second Frequency = 25.2855 cm-1

```

```

Ru 0.63103 0.20681 0.11341
N 0.52663 2.07487 -0.36196
C 0.48783 3.19548 -0.65918
C 0.44957 4.59716 -1.03095
H -0.57320 4.89579 -1.27852
H 0.80634 5.22226 -0.20686
H 1.08390 4.77556 -1.90434
O 2.51194 0.03199 -0.88713
C 3.17845 0.31737 0.16395
O 2.58116 0.57488 1.24242
C 4.68049 0.37297 0.08358
H 5.12063 0.11502 1.04833
H 5.04857 -0.29290 -0.69888
H 4.98628 1.39431 -0.16658
O 0.96046 -1.78766 0.77535
C 0.86408 -2.81492 0.10085
O 0.36813 -2.84529 -1.11053
C 1.31673 -4.14208 0.61547
H 1.65174 -4.04488 1.64677
H 0.50205 -4.86717 0.54352
H 2.13672 -4.50832 -0.00920
N -1.00426 0.28871 1.32807
C -2.22136 0.04761 0.76587
C -0.91238 0.51257 2.64668
C -3.36975 0.03027 1.56267
C -2.01765 0.51008 3.48296
H 0.09374 0.69230 3.01419
C -3.27133 0.26244 2.92601
H -4.33379 -0.16886 1.10705
H -1.89222 0.69610 4.54400
H -4.16069 0.24909 3.54927
C -2.15811 -0.16720 -0.67595
C -0.83664 -0.13118 -1.20746
C -3.27751 -0.35399 -1.49218
C -0.72246 -0.25941 -2.60563
H 0.06688 -1.93058 -1.34118
C -3.11988 -0.50518 -2.86511
H -4.27857 -0.37513 -1.06624
C -1.83995 -0.45113 -3.41850
H 0.26699 -0.20500 -3.05829
H -3.98765 -0.65473 -3.50082
H -1.71374 -0.55406 -4.49407

```

<sup>2</sup>G (K<sup>2</sup>K<sup>-1</sup>)

## XYZ Coordinates and Computed Energies

## PBE1PBE Optimised Geometries and Energies

SCF (PBE1PBE) Energy = -1295.44689550  
 Enthalpy 0K = -1295.075102  
 Enthalpy 298K = -1295.044038  
 Free Energy 298K = -1295.140259  
 Lowest Frequency = 28.5847 cm<sup>-1</sup>  
 Second Frequency = 30.0193 cm<sup>-1</sup>

|    |          |          |          |
|----|----------|----------|----------|
| N  | -1.91701 | 0.96029  | 0.88238  |
| C  | -2.84230 | 1.49729  | 1.31528  |
| C  | -4.04295 | 2.14055  | 1.80956  |
| H  | -4.36768 | 1.66748  | 2.74023  |
| H  | -3.86110 | 3.20175  | 1.99943  |
| H  | -4.83651 | 2.04220  | 1.06319  |
| O  | -3.15638 | 0.22037  | -1.67819 |
| C  | -2.73623 | -0.92724 | -1.55757 |
| O  | -1.66333 | -1.30942 | -0.93289 |
| C  | -3.48790 | -2.10368 | -2.16490 |
| H  | -2.82456 | -2.68691 | -2.81041 |
| H  | -3.83011 | -2.77077 | -1.36797 |
| H  | -4.34485 | -1.74833 | -2.73860 |
| O  | -0.62320 | -1.49375 | 1.58466  |
| C  | -0.27549 | -1.22405 | 2.79825  |
| O  | 0.25645  | -0.17371 | 3.17545  |
| C  | -0.56644 | -2.34339 | 3.77874  |
| H  | -1.62140 | -2.62491 | 3.72126  |
| H  | 0.01758  | -3.22814 | 3.50813  |
| H  | -0.31381 | -2.03511 | 4.79364  |
| N  | 1.19367  | -1.20641 | -0.54103 |
| C  | 2.43689  | -0.67911 | -0.43477 |
| C  | 1.03105  | -2.47029 | -0.95543 |
| C  | 3.55850  | -1.44245 | -0.76495 |
| C  | 2.10744  | -3.27165 | -1.30410 |
| H  | -0.00249 | -2.79903 | -1.00297 |
| C  | 3.39379  | -2.74727 | -1.20614 |
| H  | 4.54916  | -1.01713 | -0.64792 |
| H  | 1.93436  | -4.28955 | -1.63607 |
| H  | 4.25944  | -3.35257 | -1.45836 |
| C  | 2.48587  | 0.70423  | 0.04960  |
| C  | 1.35936  | 1.20238  | 0.74276  |
| C  | 3.55572  | 1.55838  | -0.22928 |
| C  | 1.35051  | 2.53453  | 1.16410  |
| H  | 0.70065  | 0.52120  | 1.43176  |
| C  | 3.52655  | 2.88552  | 0.18518  |
| H  | 4.40416  | 1.19590  | -0.80341 |
| C  | 2.42125  | 3.37508  | 0.88061  |
| H  | 0.50050  | 2.89487  | 1.73517  |
| H  | 4.36413  | 3.53937  | -0.03958 |
| H  | 2.40189  | 4.41021  | 1.21022  |
| Ru | -0.39606 | -0.07853 | 0.10366  |
| N  | -0.36903 | 1.12924  | -1.48439 |
| C  | -0.50060 | 1.77843  | -2.43032 |
| C  | -0.77531 | 2.55669  | -3.62133 |
| H  | -0.61864 | 3.62153  | -3.42996 |
| H  | -0.12536 | 2.24649  | -4.44389 |
| H  | -1.81857 | 2.39312  | -3.90791 |

TS (<sup>2</sup>G-<sup>2</sup>H)

SCF (PBE1PBE) Energy = -1295.44157254  
 Enthalpy 0K = -1295.073825  
 Enthalpy 298K = -1295.043273  
 Free Energy 298K = -1295.137520  
 Lowest Frequency = -996.8333 cm<sup>-1</sup>  
 Second Frequency = 29.0445 cm<sup>-1</sup>

|   |         |          |         |
|---|---------|----------|---------|
| N | 1.85777 | -1.18137 | 0.75614 |
| C | 2.79025 | -1.80310 | 1.03522 |
| C | 4.02125 | -2.51341 | 1.31696 |
| H | 4.32429 | -2.35435 | 2.35532 |
| H | 3.89929 | -3.58629 | 1.14570 |
| H | 4.80338 | -2.13055 | 0.65432 |

|    |          |          |          |
|----|----------|----------|----------|
| O  | 3.36787  | 0.30948  | -1.29538 |
| C  | 2.89576  | 1.37121  | -0.88912 |
| O  | 1.75530  | 1.54725  | -0.30178 |
| C  | 3.67163  | 2.67322  | -1.04976 |
| H  | 3.07271  | 3.40392  | -1.60201 |
| H  | 3.87638  | 3.10475  | -0.06529 |
| H  | 4.61085  | 2.49474  | -1.57528 |
| O  | 0.41797  | 0.94765  | 2.05132  |
| C  | -0.25351 | 0.38658  | 2.96637  |
| O  | -0.94779 | -0.65051 | 2.77816  |
| C  | -0.22731 | 0.99841  | 4.34018  |
| H  | 0.47011  | 1.83499  | 4.37900  |
| H  | -1.23289 | 1.34232  | 4.59876  |
| H  | 0.05281  | 0.23778  | 5.07336  |
| N  | -1.15480 | 1.30092  | -0.31978 |
| C  | -2.38319 | 0.74862  | -0.48694 |
| C  | -0.98981 | 2.62796  | -0.40748 |
| C  | -3.48589 | 1.56534  | -0.75387 |
| C  | -2.04770 | 3.48259  | -0.67537 |
| H  | 0.03375  | 2.96334  | -0.26620 |
| C  | -3.31850 | 2.93825  | -0.85025 |
| H  | -4.46844 | 1.11974  | -0.86299 |
| H  | -1.87443 | 4.55134  | -0.73886 |
| H  | -4.17182 | 3.57951  | -1.05121 |
| C  | -2.41751 | -0.70845 | -0.35391 |
| C  | -1.26933 | -1.31394 | 0.22508  |
| C  | -3.47630 | -1.48527 | -0.83296 |
| C  | -1.25426 | -2.71558 | 0.30349  |
| H  | -0.84191 | -0.84013 | 1.43327  |
| C  | -3.42592 | -2.87087 | -0.74256 |
| H  | -4.33329 | -1.01312 | -1.30707 |
| C  | -2.30886 | -3.48529 | -0.17513 |
| H  | -0.39990 | -3.20256 | 0.76714  |
| H  | -4.25057 | -3.47004 | -1.11761 |
| H  | -2.26691 | -4.56928 | -0.10208 |
| Ru | 0.38854  | 0.03966  | 0.17312  |
| N  | 0.58239  | -0.63323 | -1.67885 |
| C  | 0.83608  | -0.96816 | -2.75408 |
| C  | 1.26261  | -1.34795 | -4.08567 |
| H  | 1.12834  | -2.42158 | -4.24165 |
| H  | 0.68890  | -0.80707 | -4.84302 |
| H  | 2.32253  | -1.09837 | -4.19322 |

<sup>2</sup>H

SCF (PBE1PBE) Energy = -1295.45439468  
 Enthalpy 0K = -1295.081733  
 Enthalpy 298K = -1295.050622  
 Free Energy 298K = -1295.146903  
 Lowest Frequency = 21.7846 cm<sup>-1</sup>  
 Second Frequency = 27.2316 cm<sup>-1</sup>

|   |          |          |          |
|---|----------|----------|----------|
| N | 1.66565  | -1.55667 | -0.09681 |
| C | 2.59972  | -2.22703 | -0.22203 |
| C | 3.88160  | -2.88032 | -0.38926 |
| H | 4.15187  | -3.44352 | 0.50796  |
| H | 3.86937  | -3.56192 | -1.24384 |
| H | 4.62252  | -2.09181 | -0.56027 |
| O | 3.58167  | 0.63407  | -0.60457 |
| C | 3.09573  | 1.30318  | 0.31365  |
| O | 1.89427  | 1.24115  | 0.77579  |
| C | 3.95557  | 2.34573  | 1.02527  |
| H | 3.52001  | 3.34151  | 0.89216  |
| H | 3.97178  | 2.14620  | 2.10103  |
| H | 4.97365  | 2.34010  | 0.63234  |
| O | 0.12572  | -0.45542 | 2.15088  |
| C | -0.45790 | -1.41024 | 2.66618  |
| O | -1.12468 | -2.30541 | 1.98040  |
| C | -0.45712 | -1.63094 | 4.14386  |
| H | 0.15733  | -0.87491 | 4.62986  |
| H | -1.48269 | -1.58234 | 4.52075  |

## XYZ Coordinates and Computed Energies

## PBE1PBE Optimised Geometries and Energies

|    |          |          |          |
|----|----------|----------|----------|
| H  | -0.07556 | -2.63105 | 4.36652  |
| N  | -1.04804 | 1.42548  | 0.27114  |
| C  | -2.32113 | 1.14101  | -0.11145 |
| C  | -0.74569 | 2.61948  | 0.79804  |
| C  | -3.32241 | 2.10551  | 0.04396  |
| C  | -1.70016 | 3.61000  | 0.97181  |
| H  | 0.30057  | 2.73368  | 1.07209  |
| C  | -3.01234 | 3.34364  | 0.58524  |
| H  | -4.33955 | 1.87747  | -0.25488 |
| H  | -1.41675 | 4.56425  | 1.40247  |
| H  | -3.78803 | 4.09420  | 0.70840  |
| C  | -2.49470 | -0.20301 | -0.66288 |
| C  | -1.32516 | -1.02172 | -0.64165 |
| C  | -3.70162 | -0.65319 | -1.20784 |
| C  | -1.46026 | -2.29926 | -1.22092 |
| H  | -1.11261 | -2.01505 | 1.02806  |
| C  | -3.79290 | -1.92918 | -1.75064 |
| H  | -4.57781 | -0.00861 | -1.22311 |
| C  | -2.66512 | -2.74957 | -1.75887 |
| H  | -0.59220 | -2.95646 | -1.25032 |
| H  | -4.73178 | -2.27825 | -2.17048 |
| H  | -2.72579 | -3.74577 | -2.19197 |
| Ru | 0.33664  | -0.08045 | 0.06113  |
| N  | 0.75617  | 0.43737  | -1.76702 |
| C  | 1.12929  | 0.76813  | -2.80977 |
| C  | 1.70378  | 1.20418  | -4.06676 |
| H  | 1.54981  | 0.45201  | -4.84530 |
| H  | 1.24833  | 2.14358  | -4.39215 |
| H  | 2.77793  | 1.35948  | -3.92598 |

## XYZ Coordinates and Computed Energies

 $\omega$ B97X-D Optimised Geometries and Energies

$\bar{\text{OAc}}$  (\* single point)  
 SCF ( $\omega$ B97X-D) Energy = -228.424588068  
 Enthalpy 0K = -228.376170  
 Enthalpy 298K = -228.371220  
 Free Energy 298K = -228.402379  
 Lowest Frequency = 272.7232  $\text{cm}^{-1}$   
 Second Frequency = 444.2016  $\text{cm}^{-1}$

AcOH  
 SCF ( $\omega$ B97X-D) Energy = -229.016577398  
 Enthalpy 0K = -228.953751  
 Enthalpy 298K = -228.948276  
 Free Energy 298K = -228.980902  
 Lowest Frequency = 74.1530  $\text{cm}^{-1}$   
 Second Frequency = 426.5462  $\text{cm}^{-1}$

O -0.77440 -1.04070 -0.00013  
 H -1.71185 -0.80413 -0.00042  
 C -0.09310 0.12258 0.00048  
 O -0.64494 1.19574 -0.00012  
 C 1.39325 -0.10776 -0.00002  
 H 1.67864 -0.68787 0.88126  
 H 1.67808 -0.68811 -0.88132  
 H 1.90890 0.85091 -0.00032

**a-H**, 2-phenylpyridine  
 SCF ( $\omega$ B97X-D) Energy = -479.183810577  
 Enthalpy 0K = -479.011919  
 Enthalpy 298K = -479.002292  
 Free Energy 298K = -479.046538  
 Lowest Frequency = 52.4988  $\text{cm}^{-1}$   
 Second Frequency = 95.9802  $\text{cm}^{-1}$

N -1.36313 -1.14623 -0.25601  
 C -2.69399 -1.18890 -0.26374  
 C -3.50561 -0.08440 -0.02577  
 H -3.13672 -2.16029 -0.47414  
 H -4.58558 -0.17779 -0.05037  
 C 0.72493 0.02409 -0.00643  
 C 1.46090 1.18733 -0.25366  
 C 2.80233 -1.19359 0.24947  
 C 2.85168 1.16192 -0.24308  
 H 0.95058 2.11763 -0.48380  
 C 3.52705 -0.02759 0.01335  
 H 3.32207 -2.12631 0.44568  
 H 3.40783 2.07221 -0.44434  
 H 4.61238 -0.04739 0.02269  
 C -0.76324 0.02593 -0.00285  
 C -2.88543 1.12776 0.25444  
 H -3.47291 2.01576 0.46634  
 C -1.49866 1.18528 0.27290  
 H -0.99346 2.11176 0.52099  
 C 1.41323 -1.16940 0.23551  
 H 0.83855 -2.07250 0.40829

Benzene ( $\text{C}_6\text{H}_6$ )  
 SCF ( $\omega$ B97X-D) Energy = -232.168797265  
 Enthalpy 0K = -232.068128  
 Enthalpy 298K = -232.062917  
 Free Energy 298K = -232.095547  
 Lowest Frequency = 441.7058  $\text{cm}^{-1}$   
 Second Frequency = 441.8681  $\text{cm}^{-1}$

C 0.00000 1.40481 0.00000  
 C -1.21659 0.70239 0.00000  
 C -1.21659 -0.70239 0.00000  
 C 0.00000 -1.40480 0.00000  
 C 1.21659 -0.70239 0.00000  
 C 1.21658 0.70240 0.00000  
 H -2.16519 1.25006 0.00000

H -2.16518 -1.25007 0.00000  
 H 0.00001 -2.50014 0.00000  
 H 2.16519 -1.25006 0.00000  
 H 2.16518 1.25007 0.00000  
 H -0.00001 2.50001 0.00000

MeCN  
 SCF ( $\omega$ B97X-D) Energy = -132.705927825  
 Enthalpy 0K = -132.660090  
 Enthalpy 298K = -132.655556  
 Free Energy 298K = -132.684097  
 Lowest Frequency = 389.7137  $\text{cm}^{-1}$   
 Second Frequency = 389.7828  $\text{cm}^{-1}$

C 0.00002 -1.17938 0.00000  
 H -1.02596 -1.55381 0.00000  
 H 0.51299 -1.55382 0.88853  
 H 0.51299 -1.55382 -0.88853  
 C 0.00000 0.27994 0.00000  
 N -0.00002 1.43687 0.00000

**A**  
 SCF ( $\omega$ B97X-D) Energy = -783.983987391  
 Enthalpy 0K = -783.774675  
 Enthalpy 298K = -783.758307  
 Free Energy 298K = -783.819245  
 Lowest Frequency = 19.2486  $\text{cm}^{-1}$   
 Second Frequency = 62.2075  $\text{cm}^{-1}$

C 1.85534 -0.71676 1.41715  
 C 2.47971 0.35451 0.70018  
 C 2.47746 0.34959 -0.70834  
 C 1.85225 -0.72698 -1.41677  
 C 1.25461 -1.78874 -0.71042  
 C 1.25594 -1.78364 0.71984  
 Ru 0.42322 0.10689 -0.00076  
 O -0.39661 1.75938 -1.08482  
 C -0.78798 2.28763 0.00100  
 C -1.70938 3.46697 0.00153  
 H 2.85347 1.20703 -1.25317  
 H 0.67850 -2.53496 1.24029  
 O -1.55626 -0.40450 -0.00577  
 C -2.04192 -1.61207 0.00021  
 O -1.39722 -2.65696 0.00800  
 O -0.40045 1.75534 1.08626  
 C -3.56151 -1.62065 -0.00296  
 H -3.93432 -1.08800 0.87593  
 H -3.93107 -1.09235 -0.88581  
 H -3.93161 -2.64578 -0.00089  
 H -2.73695 3.09180 -0.00131  
 H -1.56099 4.06537 0.90113  
 H -1.55737 4.06893 -0.89508  
 H 1.76363 -0.65712 2.49517  
 H 0.67552 -2.54353 -1.22406  
 H 1.75868 -0.67521 -2.49501  
 H 2.85783 1.21536 1.23807

**B<sup>+</sup>**  
 SCF ( $\omega$ B97X-D) Energy = -1034.58037705  
 Enthalpy 0K = -1034.248170  
 Enthalpy 298K = -1034.227198  
 Free Energy 298K = -1034.297573  
 Lowest Frequency = 35.3332  $\text{cm}^{-1}$   
 Second Frequency = 41.5378  $\text{cm}^{-1}$

C -0.36496 -2.17556 -0.70013  
 C -2.76647 -1.28427 1.95380  
 C -3.75831 -1.79518 1.11774

## XYZ Coordinates and Computed Energies

 $\omega$ B97X-D Optimised Geometries and Energies

C -3.98646 -1.21256 -0.12739  
 C -2.20319 0.36858 0.28742  
 C -1.28014 3.82930 -0.87570  
 O 1.07992 -0.08763 1.87050  
 C 2.10891 0.64037 1.71284  
 O 2.56883 0.71042 0.52568  
 C 2.72241 1.40314 2.83761  
 H -1.76171 4.78321 -1.06160  
 H 2.50204 0.91831 3.78865  
 H 3.79900 1.49201 2.68837  
 H 2.29448 2.41037 2.85251  
 H -4.76737 -1.59676 -0.77501  
 H -4.36301 -2.63563 1.44190  
 H -2.60193 -1.72147 2.93303  
 C 0.65261 2.43237 -0.82274  
 H 1.71396 2.26527 -0.95736  
 C 0.08534 3.66783 -1.07890  
 H 0.70988 4.48009 -1.43038  
 C -1.39085 1.52215 -0.18015  
 Ru 0.99889 -0.49531 -0.22509  
 C 2.24191 -1.57679 -1.64227  
 H 3.23604 -1.26391 -1.94128  
 C 2.08448 -2.39078 -0.48493  
 H 2.95223 -2.71258 0.07690  
 C 0.78151 -2.66107 -0.00906  
 H 0.65352 -3.17160 0.93868  
 C 1.11418 -1.08026 -2.34161  
 H 1.24395 -0.42245 -3.19181  
 C -0.18717 -1.38501 -1.85577  
 H -1.05406 -0.93008 -2.32070  
 H -1.35763 -2.33884 -0.29853  
 C -2.01656 2.74531 -0.42169  
 H -3.08046 2.82881 -0.23315  
 C -3.21879 -0.12523 -0.53675  
 H -3.40316 0.33772 -1.50269  
 N -0.06104 1.37324 -0.38762  
 C -1.98873 -0.20632 1.54302  
 H -1.20811 0.17988 2.18826

TS ( $\mathbf{B}^+ - \mathbf{C}^+$ )

SCF ( $\omega$ B97X-D) Energy = -1034.55335177  
 Enthalpy 0K = -1034.222714  
 Enthalpy 298K = -1034.201908  
 Free Energy 298K = -1034.272662  
 Lowest Frequency = -103.7951  $\text{cm}^{-1}$   
 Second Frequency = 26.1535  $\text{cm}^{-1}$

C -0.65292 2.43225 -0.82215  
 N 0.06092 1.37318 -0.38712  
 C 1.39074 1.52221 -0.17989  
 C 2.01633 2.74539 -0.42164  
 C 1.27975 3.82928 -0.87565  
 C -0.08577 3.66769 -1.07856  
 Ru -0.99892 -0.49540 -0.22488  
 C -2.08344 -2.39154 -0.48612  
 C -2.24174 -1.57642 -1.64254  
 C -1.11454 -1.07861 -2.34182  
 C 0.18711 -1.38304 -1.85670  
 C 0.36577 -2.17464 -0.70190  
 C -0.78015 -2.66161 -0.01101  
 H -1.24500 -0.41999 -3.19129  
 C 2.20321 0.36872 0.28769  
 C 3.21913 -0.12472 -0.53630  
 C 3.98689 -1.21199 -0.12696  
 C 3.75848 -1.79495 1.11797  
 C 2.76631 -1.28441 1.95385  
 C 1.98848 -0.20652 1.54309  
 H -0.65152 -3.17329 0.93602  
 O -2.56899 0.70991 0.52599  
 C -2.10926 0.63955 1.71323

O -1.08029 -0.08846 1.87085  
 C -2.72302 1.40195 2.83812  
 H -2.29507 2.40916 2.85354  
 H -3.79957 1.49089 2.68863  
 H -2.50291 0.91675 3.78904  
 H 3.40372 0.33849 -1.50208  
 H 4.76807 -1.59589 -0.77443  
 H 2.60154 -1.72186 2.93294  
 H 4.36323 -2.63538 1.44209  
 H 3.08024 2.82901 -0.23324  
 H 1.20760 0.17936 2.18818  
 H -2.95081 -2.71467 0.07553  
 H 1.35868 -2.33785 -0.30086  
 H -3.23614 -1.26386 -1.94095  
 H 1.05356 -0.92699 -2.32133  
 H -0.71040 4.47990 -1.43000  
 H 1.76121 4.78320 -1.06170  
 H -1.71429 2.26509 -0.95650

 $\mathbf{C}^+$ 

SCF ( $\omega$ B97X-D) Energy = -1034.57386448  
 Enthalpy 0K = -1034.241840  
 Enthalpy 298K = -1034.220689  
 Free Energy 298K = -1034.292033  
 Lowest Frequency = 26.1318  $\text{cm}^{-1}$   
 Second Frequency = 37.6242  $\text{cm}^{-1}$

C 0.38126 2.72724 -0.05443  
 N 0.57346 1.41770 -0.28160  
 C 1.81880 0.95294 -0.54287  
 C 2.89721 1.83640 -0.61206  
 C 2.69290 3.19065 -0.40260  
 C 1.41062 3.64892 -0.10887  
 Ru -0.97891 0.00307 -0.18341  
 C -3.05660 -0.69142 0.17390  
 C -3.17486 0.72865 0.01528  
 C -2.60438 1.33800 -1.10037  
 C -1.90756 0.54742 -2.07450  
 C -1.88024 -0.86032 -1.96066  
 C -2.48053 -1.49195 -0.82955  
 H -2.62641 2.41706 -1.20432  
 C 1.88848 -0.50447 -0.68992  
 C 3.06864 -1.19639 -0.97066  
 C 3.06261 -2.58427 -1.04052  
 C 1.87722 -3.27828 -0.82012  
 C 0.69569 -2.58627 -0.54607  
 C 0.66587 -1.18607 -0.48453  
 H -2.43047 -2.56652 -0.70858  
 O -0.62622 0.15178 1.95258  
 C 0.08052 -0.44349 2.77388  
 O 0.88236 -1.43091 2.47015  
 C 0.07957 -0.07774 4.22274  
 H 1.08125 0.25279 4.50965  
 H -0.64373 0.71286 4.41112  
 H -0.15511 -0.96075 4.82185  
 H 4.00041 -0.66413 -1.13456  
 H 3.97941 -3.12090 -1.25750  
 H -0.21166 -3.15766 -0.37178  
 H 1.86756 -4.36286 -0.86154  
 H 3.89087 1.46072 -0.82203  
 H 0.86328 -1.60397 1.50425  
 H -3.41714 -1.15580 1.08453  
 H -1.34945 -1.45295 -2.69571  
 H -3.62985 1.32376 0.79743  
 H -1.40359 1.03025 -2.90305  
 H 1.20872 4.69680 0.07581  
 H 3.52592 3.88299 -0.45804  
 H -0.63277 3.02528 0.18344

 $\mathbf{B} \cdot \text{OAc}$

## XYZ Coordinates and Computed Energies

 $\omega$ B97X-D Optimised Geometries and Energies

SCF (wB97X-D) Energy = -1263.17512334  
 Enthalpy 0K = -1262.791890  
 Enthalpy 298K = -1262.765452  
 Free Energy 298K = -1262.847748  
 Lowest Frequency = 32.6656 cm<sup>-1</sup>  
 Second Frequency = 48.3445 cm<sup>-1</sup>

|    |          |          |          |
|----|----------|----------|----------|
| C  | -0.74398 | -1.90540 | 1.14078  |
| N  | -0.40105 | -0.63641 | 0.85519  |
| C  | -1.19485 | 0.36807  | 1.28623  |
| C  | -2.33418 | 0.10046  | 2.04078  |
| C  | -2.67320 | -1.20769 | 2.34948  |
| C  | -1.85852 | -2.23256 | 1.89074  |
| Ru | 1.26640  | -0.39070 | -0.46932 |
| C  | 2.65232  | -0.40287 | -2.16784 |
| C  | 1.62591  | -1.37884 | -2.35892 |
| C  | 0.26024  | -1.01530 | -2.31778 |
| C  | -0.09459 | 0.33661  | -2.04953 |
| C  | 0.90385  | 1.30694  | -1.81782 |
| C  | 2.27995  | 0.92742  | -1.87158 |
| H  | -0.56556 | -1.73326 | -2.31252 |
| C  | -0.87415 | 1.77674  | 0.93323  |
| C  | -1.76079 | 2.47230  | 0.10557  |
| C  | -1.48301 | 3.79181  | -0.24227 |
| C  | -0.33762 | 4.42185  | 0.24076  |
| C  | 0.53495  | 3.72992  | 1.07897  |
| C  | 0.26825  | 2.40965  | 1.42826  |
| H  | 3.04312  | 1.64401  | -1.58851 |
| O  | 2.16914  | -1.90524 | 0.75442  |
| C  | 2.59164  | -1.03496 | 1.57838  |
| O  | 2.39526  | 0.18419  | 1.29444  |
| C  | 3.25165  | -1.44310 | 2.85924  |
| H  | 3.91010  | -0.65108 | 3.21676  |
| H  | 2.47465  | -1.61657 | 3.61008  |
| H  | 3.80484  | -2.37252 | 2.71895  |
| H  | -2.61515 | 1.93846  | -0.30614 |
| H  | -2.16238 | 4.32590  | -0.89915 |
| H  | 1.42427  | 4.21848  | 1.46487  |
| H  | -0.12695 | 5.45167  | -0.03165 |
| H  | -2.94878 | 0.93295  | 2.36081  |
| H  | 0.95759  | 1.86256  | 2.06129  |
| H  | 3.69315  | -0.70065 | -2.13554 |
| H  | 0.63087  | 2.31059  | -1.51280 |
| H  | 1.90162  | -2.42459 | -2.44176 |
| H  | -1.16806 | 0.51768  | -1.87464 |
| H  | -2.09150 | -3.27428 | 2.07133  |
| H  | -3.56799 | -1.42284 | 2.92374  |
| H  | -0.09592 | -2.67299 | 0.74071  |
| O  | -2.31812 | -2.08285 | -1.44248 |
| C  | -3.11416 | -1.14992 | -1.17486 |
| C  | -4.48560 | -1.54485 | -0.60652 |
| H  | -4.44595 | -2.52938 | -0.13447 |
| H  | -4.84057 | -0.79380 | 0.10445  |
| H  | -5.20954 | -1.58915 | -1.42731 |
| O  | -2.92135 | 0.08727  | -1.34344 |

## TS (B-C) 1.OAc (\* single point)

SCF (wB97X-D) Energy = -1263.13832583  
 Enthalpy 0K = -1262.760647  
 Enthalpy 298K = -1262.735961  
 Free Energy 298K = -1262.812308  
 Lowest Frequency = -68.5333 cm<sup>-1</sup>  
 Second Frequency = 39.5001 cm<sup>-1</sup>

## INT (B-C) .OAc

SCF (wB97X-D) Energy = -1263.14567531  
 Enthalpy 0K = -1262.764289  
 Enthalpy 298K = -1262.737009

Free Energy 298K = -1262.823820  
 Lowest Frequency = 22.4835 cm<sup>-1</sup>  
 Second Frequency = 27.0224 cm<sup>-1</sup>

|    |          |          |          |
|----|----------|----------|----------|
| C  | -1.54362 | 1.44508  | 0.40118  |
| N  | -0.27534 | 1.09810  | 0.16567  |
| C  | 0.66361  | 2.03046  | -0.09233 |
| C  | 0.34548  | 3.37641  | -0.13352 |
| C  | -0.97302 | 3.75640  | 0.11613  |
| C  | -1.92196 | 2.78410  | 0.38761  |
| Ru | 0.40136  | -0.89311 | 0.03620  |
| C  | 1.24152  | -2.81847 | -0.64777 |
| C  | -0.07137 | -3.02239 | -0.18526 |
| C  | -1.13944 | -2.20535 | -0.66621 |
| C  | -0.88942 | -1.22904 | -1.67313 |
| C  | 0.42780  | -1.04408 | -2.17143 |
| C  | 1.48960  | -1.79537 | -1.62114 |
| H  | -2.13327 | -2.20013 | -0.22124 |
| C  | 2.01649  | 1.46937  | -0.33048 |
| C  | 2.74917  | 1.78159  | -1.47813 |
| C  | 3.96896  | 1.15510  | -1.71049 |
| C  | 4.47202  | 0.21890  | -0.80327 |
| C  | 3.75281  | -0.08270 | 0.34686  |
| C  | 2.52147  | 0.53443  | 0.59110  |
| H  | 2.51251  | -1.54954 | -1.88545 |
| O  | -0.11353 | -1.12301 | 2.00506  |
| C  | 0.00996  | -0.26966 | 2.98264  |
| O  | 0.69878  | 0.74733  | 2.96224  |
| C  | -0.80759 | -0.65255 | 4.19985  |
| H  | -1.86968 | -0.58028 | 3.94869  |
| H  | -0.60867 | -1.69040 | 4.47719  |
| H  | -0.57888 | 0.01224  | 5.03250  |
| H  | 2.35067  | 2.49352  | -2.19477 |
| H  | 4.53326  | 1.39560  | -2.60612 |
| H  | 4.14737  | -0.78562 | 1.07385  |
| H  | 5.42930  | -0.25654 | -0.99149 |
| H  | 1.11947  | 4.10728  | -0.33802 |
| H  | 2.00870  | 0.42822  | 1.55534  |
| H  | 2.07057  | -3.35431 | -0.20183 |
| H  | 0.63932  | -0.23837 | -2.86402 |
| H  | -0.24640 | -3.68892 | 0.65112  |
| H  | -1.71597 | -0.53529 | -1.92218 |
| H  | -2.96004 | 3.03664  | 0.56401  |
| H  | -1.24957 | 4.80532  | 0.09330  |
| H  | -2.25582 | 0.62847  | 0.54743  |
| O  | -3.61303 | -0.71327 | -0.04097 |
| C  | -3.99278 | -0.02793 | -1.03345 |
| C  | -5.50175 | 0.20631  | -1.16055 |
| H  | -6.01207 | -0.75706 | -1.25575 |
| H  | -5.87974 | 0.67526  | -0.24675 |
| H  | -5.73644 | 0.83182  | -2.02347 |
| O  | -3.24779 | 0.48503  | -1.90807 |

## TS (B-C) 2.OAc

SCF (wB97X-D) Energy = -1263.13733834  
 Enthalpy 0K = -1262.760181  
 Enthalpy 298K = -1262.733755  
 Free Energy 298K = -1262.818052  
 Lowest Frequency = -977.1404 cm<sup>-1</sup>  
 Second Frequency = 15.0560 cm<sup>-1</sup>

|    |          |          |          |
|----|----------|----------|----------|
| C  | -1.50113 | 1.38195  | 0.61788  |
| N  | -0.26181 | 1.06856  | 0.22010  |
| C  | 0.65649  | 2.03416  | -0.02530 |
| C  | 0.33116  | 3.37335  | 0.14006  |
| C  | -0.95491 | 3.71294  | 0.55170  |
| C  | -1.87906 | 2.70877  | 0.79219  |
| Ru | 0.31824  | -0.91795 | -0.09369 |
| C  | 0.83629  | -2.93052 | -0.88736 |
| C  | -0.42592 | -2.98778 | -0.25503 |



## XYZ Coordinates and Computed Energies

```

C -1.47823 -2.10398 -0.62742
C -1.24978 -1.13287 -1.62952
C 0.01828 -1.05317 -2.27480
C 1.05104 -1.93916 -1.89061
H -2.41798 -2.03051 -0.08142
C 1.97635 1.52484 -0.43628
C 2.89152 2.28092 -1.16754
C 4.11034 1.72178 -1.53837
C 4.42384 0.41222 -1.17585
C 3.50685 -0.34130 -0.45159
C 2.26128 0.18663 -0.08598
H 2.04306 -1.81525 -2.30969
O -0.00947 -1.10607 1.97219
C 0.84338 -0.68573 2.81251
O 1.93704 -0.15640 2.48559
C 0.49438 -0.80775 4.27195
H 0.07847 0.14790 4.60463
H -0.25475 -1.58408 4.42436
H 1.39220 -1.00832 4.85759
H 2.65032 3.29512 -1.47143
H 4.81997 2.31103 -2.11041
H 3.76083 -1.35259 -0.14443
H 5.38404 -0.01206 -1.45226
H 1.08019 4.13671 -0.03473
H 1.94690 -0.13930 1.13144
H 1.64665 -3.57389 -0.56813
H 0.21700 -0.26927 -2.99547
H -0.56318 -3.64611 0.59549
H -2.03680 -0.37209 -1.78100
H -2.89718 2.92583 1.09010
H -1.22604 4.75580 0.67982
H -2.20829 0.55857 0.75291
O -3.81538 -0.52833 0.31141
C -4.21891 0.23825 -0.60938
C -5.71396 0.57813 -0.60275
H -6.28764 -0.32339 -0.84139
H -6.02126 0.89455 0.39830
H -5.94795 1.35484 -1.33302
O -3.51273 0.74406 -1.51929

```

**C.OAc**

```

SCF (wB97X-D) Energy = -1263.15945024
Enthalpy 0K = -1262.777272
Enthalpy 298K = -1262.750133
Free Energy 298K = -1262.837711
Lowest Frequency = 11.9632 cm-1
Second Frequency = 25.7060 cm-1

```

```

C -1.42051 1.53422 0.22088
N -0.20632 1.08088 -0.12273
C 0.75834 1.93413 -0.55222
C 0.49257 3.29306 -0.66339
C -0.77123 3.77116 -0.32954
C -1.73539 2.88482 0.12377
Ru 0.25756 -0.96224 -0.07452
C 0.49312 -3.15443 -0.35747
C -0.66751 -2.92706 0.43549
C -1.73032 -2.10874 -0.01071
C -1.58568 -1.41793 -1.23537
C -0.42254 -1.60231 -2.03937
C 0.60638 -2.47857 -1.59880
H -2.58873 -1.85111 0.60577
C 2.04871 1.27694 -0.81632
C 3.19391 1.95703 -1.24147
C 4.39123 1.27114 -1.39960
C 4.44714 -0.09305 -1.11972
C 3.30321 -0.77038 -0.70228
C 2.07159 -0.11403 -0.55206
H 1.51886 -2.56853 -2.17781
O 0.50153 -0.66791 2.07540

```

## wB97X-D Optimised Geometries and Energies

```

C 1.25730 0.00550 2.77336
O 2.31976 0.62821 2.31745
C 1.02388 0.18942 4.23999
H 0.75698 1.23380 4.42414
H 0.21251 -0.45682 4.56895
H 1.94013 -0.02208 4.79491
H 3.16044 3.02270 -1.44833
H 5.27987 1.79948 -1.72893
H 3.37039 -1.83381 -0.48431
H 5.38506 -0.63011 -1.22752
H 1.26436 3.97159 -1.00661
H 2.40623 0.46150 1.35328
H 1.29746 -3.78179 0.00598
H -0.30056 -1.04156 -2.95793
H -0.70373 -3.34454 1.43630
H -2.35250 -0.66633 -1.48621
H -2.73731 3.20405 0.38189
H -0.99334 4.82915 -0.42583
H -2.16351 0.80206 0.55568
O -3.84864 -0.15241 0.78744
C -4.38880 0.32677 -0.25184
C -5.88102 0.66604 -0.14625
H -6.45819 -0.26477 -0.13709
H -6.08676 1.18017 0.79672
H -6.20866 1.27457 -0.99126
O -3.82187 0.54119 -1.35235

```

**A.a-H**

```

SCF (wB97X-D) Energy = -1263.19323833
Enthalpy 0K = -1262.810509
Enthalpy 298K = -1262.783594
Free Energy 298K = -1262.869722
Lowest Frequency = 15.2062 cm-1
Second Frequency = 29.0718 cm-1

```

```

C 1.68429 1.25326 -2.24463
C 0.33253 0.89096 -1.98540
C -0.02750 -0.46079 -1.81400
C -1.52135 -1.61387 1.01467
C -1.10174 -2.94027 1.04454
H -0.15380 -3.17674 1.51564
C -2.23791 1.20793 0.38704
H -1.19783 1.00461 0.61173
O 1.10586 1.28206 1.05309
C 0.47869 3.20853 2.24043
H 1.24085 2.95925 2.98128
H 0.41441 4.28871 2.10821
H -0.48025 2.83407 2.61390
C 0.78039 2.53496 0.91319
O 0.66490 3.14021 -0.14970
O 3.40301 -0.10170 0.74859
C 2.82117 -0.88532 1.55966
O 1.68100 -1.33243 1.22667
H -0.88400 -0.86196 1.46908
C 3.43601 -1.23273 2.87905
H 3.09829 -0.49592 3.61379
H 3.10702 -2.22059 3.20375
H 4.52374 -1.18725 2.81631
C -1.88571 -3.93612 0.46772
H -1.55882 -4.97143 0.49176
C -2.72755 -1.26202 0.39646
C -3.51428 -2.27230 -0.16904
H -4.45219 -1.99544 -0.63757
C -3.09644 -3.59764 -0.13388
H -3.71636 -4.36854 -0.58157
N -4.44669 0.37839 -0.02633
C -2.66596 2.51462 0.18940
H -1.94837 3.32803 0.24370
C -3.15706 0.15903 0.26836

```

## XYZ Coordinates and Computed Energies

C -4.00584 2.74080 -0.10536  
H -4.39029 3.74146 -0.26905  
C -4.84851 1.63693 -0.19743  
H -5.90356 1.77041 -0.42818  
Ru 1.64443 0.00103 -0.46143  
C 0.97510 -1.47433 -1.90224  
H 0.71419 -2.49465 -1.64450  
C 2.31423 -1.14028 -2.20710  
H 3.08318 -1.90250 -2.20964  
C 2.66500 0.23470 -2.34563  
H 3.71064 0.50853 -2.42972  
H -1.03454 -0.72686 -1.51987  
H -0.38639 1.67351 -1.78077  
H 1.96257 2.29807 -2.24525

**B**

SCF (wB97X-D) Energy = -1263.19222485  
Enthalpy 0K = -1262.809337  
Enthalpy 298K = -1262.782552  
Free Energy 298K = -1262.867025  
Lowest Frequency = 25.7131 cm<sup>-1</sup>  
Second Frequency = 34.9502 cm<sup>-1</sup>

C -0.54075 -1.95531 2.09411  
Ru -0.62430 -0.40858 -0.44303  
C -1.00050 -0.15301 -2.60086  
C -1.87757 -1.13249 -2.07342  
C 0.01612 -2.37479 -1.14514  
C 0.91832 -1.42161 -1.67802  
H -1.40517 0.73805 -3.06140  
H -2.94323 -0.94834 -2.12742  
H 0.37289 -3.15153 -0.48140  
H 1.97852 -1.49277 -1.47230  
C -0.37262 -1.91531 3.60571  
H -0.50330 -2.91199 4.02777  
H 0.60827 -1.51604 3.87844  
H -1.12620 -1.24204 4.02437  
O -0.16380 -0.84909 1.52499  
O -0.99378 -2.94934 1.53356  
C 1.50653 1.76317 0.43269  
C -0.64898 2.56128 0.14754  
N 0.21504 1.53056 0.11119  
O -2.33468 0.19716 0.57954  
C -3.35323 0.78334 0.03968  
O -3.38873 1.27176 -1.09399  
C -4.55498 0.85808 0.96688  
H -4.27515 1.36810 1.89248  
H -5.37614 1.38696 0.48273  
H -4.86980 -0.15277 1.23944  
C 2.54311 0.70886 0.23431  
C 3.42607 0.85707 -0.83924  
C 2.68830 -0.37650 1.09946  
C 4.41746 -0.09234 -1.07370  
H 3.32741 1.71528 -1.49886  
C 3.68412 -1.31962 0.86720  
H 1.98478 -0.49618 1.91305  
C 4.54487 -1.18581 -0.22085  
H 5.08987 0.02489 -1.91756  
H 3.78466 -2.16634 1.53876  
H 5.31682 -1.92771 -0.39937  
C -0.28870 3.83588 0.55698  
C 1.92780 3.02131 0.86337  
C 1.02241 4.06902 0.94509  
H 2.97114 3.15712 1.12372  
H 1.34099 5.04915 1.28467  
H -1.03526 4.62111 0.56268  
H -1.65118 2.35143 -0.20367  
C -1.38349 -2.24855 -1.34631

## wB97X-D Optimised Geometries and Energies

H -2.05457 -2.92722 -0.83874  
C 0.39354 -0.29609 -2.36663  
H 1.06935 0.50081 -2.65822

**TS (B-C)**

SCF (wB97X-D) Energy = -1263.13562342  
Enthalpy 0K = -1262.756177  
Enthalpy 298K = -1262.730290  
Free Energy 298K = -1262.811032  
Lowest Frequency = -296.0086 cm<sup>-1</sup>  
Second Frequency = 37.5105 cm<sup>-1</sup>

C -2.09775 1.97674 -1.64252  
Ru -0.26419 -0.09130 0.75413  
C -0.54884 -1.05022 2.67525  
C -1.79303 -0.53242 2.24615  
C -0.78300 1.67259 1.94435  
C 0.47066 1.17331 2.42056  
H -0.44872 -2.11364 2.85540  
H -2.60603 -1.22385 2.06711  
H -0.85839 2.65810 1.50299  
H 1.34915 1.80669 2.38764  
C -3.45489 1.78449 -2.31562  
H -3.82569 0.78943 -2.04428  
H -4.17457 2.53029 -1.97210  
H -3.35846 1.81661 -3.40293  
O -1.10279 1.48565 -2.25509  
O -2.06589 2.55885 -0.53083  
C 2.19822 -0.84561 -0.74148  
C 1.91971 -3.57993 -0.73850  
C 0.99634 -2.74726 -0.12646  
H 0.09159 -3.11939 0.34478  
N 1.14622 -1.41372 -0.11808  
O -1.43735 -0.86602 -0.73894  
C -2.10972 -1.96651 -0.63589  
O -2.06867 -2.75509 0.31497  
C -3.01456 -2.22014 -1.82695  
H -3.01010 -3.28308 -2.07572  
H -4.03791 -1.94830 -1.54904  
H -2.71191 -1.61555 -2.68217  
H 1.76480 -4.65198 -0.72312  
C 2.24081 0.62454 -0.67449  
C 3.45799 1.29309 -0.51426  
C 1.02384 1.33353 -0.65837  
C 3.47673 2.67178 -0.34104  
H 4.38799 0.73190 -0.49039  
C 1.07285 2.72775 -0.50662  
H 0.00238 1.07301 -1.23207  
C 2.28043 3.39110 -0.33655  
H 4.42411 3.18533 -0.20943  
H 0.12146 3.25393 -0.55288  
H 2.29792 4.47026 -0.21822  
C 3.15507 -1.63062 -1.38285  
C 3.01787 -3.01073 -1.37580  
H 3.75045 -3.63543 -1.87623  
H 3.97747 -1.14994 -1.89961  
C -1.91371 0.83858 1.87367  
H -2.80064 1.22030 1.38393  
C 0.58900 -0.18338 2.77097  
H 1.55917 -0.59292 3.02892

**C**

SCF (wB97X-D) Energy = -1263.20755585  
Enthalpy 0K = -1262.824443  
Enthalpy 298K = -1262.797801  
Free Energy 298K = -1262.881432  
Lowest Frequency = 24.9426 cm<sup>-1</sup>  
Second Frequency = 38.6740 cm<sup>-1</sup>

## XYZ Coordinates and Computed Energies

 $\omega$ B97X-D Optimised Geometries and Energies

C 3.59756 -0.04531 0.98658  
 Ru -0.27919 -0.71579 -0.63460  
 C -1.37616 -2.51638 -1.52579  
 C -0.33504 -3.01830 -0.74733  
 C 1.27239 -1.56582 -1.94373  
 C 0.19893 -1.04244 -2.72900  
 H -2.39468 -2.83927 -1.34094  
 H -0.54408 -3.69656 0.06898  
 H 2.28089 -1.18694 -2.04168  
 H 0.38624 -0.25258 -3.44661  
 C 4.88903 0.72238 1.12603  
 H 5.69095 0.20454 0.60135  
 H 4.74772 1.71640 0.69015  
 H 5.14312 0.85967 2.17909  
 O 2.66085 0.41055 1.79652  
 O 3.44653 -0.95847 0.19292  
 C -4.16398 0.47278 0.95245  
 C -3.08005 -0.24345 0.47643  
 H -3.06369 -1.32524 0.47770  
 N -1.96522 0.35327 0.02940  
 O 0.29592 -0.58796 1.39783  
 C -0.31860 -1.30067 2.30465  
 O -1.24469 -2.07268 2.08324  
 C 0.20550 -1.06459 3.70991  
 H -0.09113 -0.06351 4.03687  
 H -0.20826 -1.80530 4.39379  
 H 1.29760 -1.09994 3.72685  
 H -5.04559 -0.05159 1.30036  
 C -0.55432 2.20657 -0.37563  
 C -0.23436 3.56848 -0.42316  
 C 0.38040 1.21307 -0.73568  
 C 1.02905 3.97046 -0.82814  
 H -0.96630 4.32156 -0.14438  
 C 1.65268 1.65112 -1.12640  
 H 1.77178 -0.01712 1.60934  
 C 1.97349 3.00424 -1.17451  
 H 1.28030 5.02541 -0.86740  
 H 2.42028 0.92337 -1.37058  
 H 2.97010 3.30964 -1.48274  
 C -1.85152 1.70169 0.07720  
 C -4.07525 1.86212 0.98585  
 C -2.91175 2.47688 0.55590  
 H -4.90224 2.45887 1.35707  
 H -2.81452 3.55481 0.59683  
 C 0.98742 -2.49063 -0.92272  
 H 1.78249 -2.75665 -0.23737  
 C -1.12257 -1.48617 -2.49456  
 H -1.94586 -1.04525 -3.04417

**B'**

SCF ( $\omega$ B97X-D) Energy = -1031.00288311  
 Enthalpy 0K = -1030.724361  
 Enthalpy 298K = -1030.703174  
 Free Energy 298K = -1030.774334  
 Lowest Frequency = 34.3316  $\text{cm}^{-1}$   
 Second Frequency = 52.0087  $\text{cm}^{-1}$

C -2.71468 -0.42365 -1.03008  
 Ru -0.38894 -0.36508 -0.12891  
 C -4.10072 -0.58949 -1.58351  
 H -4.83310 -0.15950 -0.89906  
 H -4.17438 -0.12912 -2.56968  
 H -4.30986 -1.65858 -1.68525  
 O -1.71296 -0.34179 -1.81278  
 O -2.51170 -0.39134 0.21895  
 C 1.92198 0.96517 -0.28909  
 C 2.47642 -1.05864 -1.29905  
 N 1.56900 -0.24865 -0.75315  
 O -0.37610 -2.45660 0.20443  
 C 0.11819 -2.28198 1.36306

O 0.40190 -1.09805 1.72188  
 C 0.32088 -3.44163 2.29248  
 H 0.53988 -4.34729 1.72516  
 H 1.12155 -3.22426 3.00034  
 H -0.60473 -3.60308 2.85303  
 C 0.70387 1.62781 0.25278  
 C 0.65964 2.14919 1.57774  
 C -0.37165 1.88526 -0.64097  
 C -0.44741 2.82941 2.00953  
 H 1.49714 1.96420 2.24211  
 C -1.49182 2.61864 -0.15869  
 H -0.24281 1.76646 -1.71185  
 C -1.54068 3.05675 1.13830  
 H -0.48876 3.19990 3.02871  
 H -2.30464 2.83429 -0.84441  
 H -2.40761 3.60111 1.49759  
 C 3.80856 -0.66885 -1.39500  
 C 3.23034 1.41432 -0.33290  
 C 4.18879 0.57442 -0.90010  
 H 3.48491 2.39189 0.06035  
 H 5.22503 0.89075 -0.95717  
 H 4.53343 -1.33856 -1.84265  
 H 2.11490 -2.02211 -1.64015

TS (**B'**-**C'**)

SCF ( $\omega$ B97X-D) Energy = -1030.96868327  
 Enthalpy 0K = -1030.690770  
 Enthalpy 298K = -1030.670095  
 Free Energy 298K = -1030.740563  
 Lowest Frequency = -65.1584  $\text{cm}^{-1}$   
 Second Frequency = 38.3893  $\text{cm}^{-1}$

C -2.89878 1.09298 -0.57550  
 Ru -0.48683 -0.27045 0.08700  
 C -4.35217 1.49001 -0.39129  
 H -4.63867 2.23597 -1.13324  
 H -4.98015 0.60312 -0.52002  
 H -4.52114 1.86897 0.61914  
 O -2.28987 1.36829 -1.61720  
 O -2.38881 0.45331 0.42314  
 C 2.38796 0.03084 -0.18739  
 C 3.18459 -2.55052 -0.63045  
 C 1.84930 -2.20933 -0.47480  
 H 1.05431 -2.94306 -0.53868  
 N 1.45790 -0.94815 -0.24636  
 O -1.35364 -2.01347 -0.62984  
 C -1.48277 -2.44889 0.55986  
 O -0.95893 -1.74059 1.47324  
 C -2.23394 -3.70506 0.86177  
 H -1.83307 -4.17771 1.75934  
 H -3.27978 -3.44281 1.04603  
 H -2.19189 -4.38547 0.01035  
 H 3.45683 -3.58339 -0.81259  
 C 1.81523 1.37401 0.03974  
 C 2.42819 2.30846 0.87770  
 C 0.57698 1.69406 -0.56312  
 C 1.82437 3.53853 1.10932  
 H 3.36117 2.05656 1.37258  
 C -0.01960 2.93772 -0.32545  
 H 0.15419 1.08687 -1.39737  
 C 0.60012 3.85106 0.51666  
 H 2.30370 4.25367 1.77011  
 H -0.96606 3.14430 -0.81162  
 H 0.13240 4.80997 0.71317  
 C 3.74393 -0.23929 -0.33338  
 C 4.14864 -1.55062 -0.55211  
 H 5.20045 -1.78694 -0.67241  
 H 4.46086 0.57290 -0.29264

**C'**

## XYZ Coordinates and Computed Energies

 $\omega$ B97X-D Optimised Geometries and Energies

SCF (wB97X-D) Energy = -1030.97062306  
 Enthalpy 0K = -1030.691794  
 Enthalpy 298K = -1030.670253  
 Free Energy 298K = -1030.743010  
 Lowest Frequency = 23.9347 cm<sup>-1</sup>  
 Second Frequency = 32.3503 cm<sup>-1</sup>

|    |          |          |          |
|----|----------|----------|----------|
| C  | 1.58569  | 1.61544  | 1.79922  |
| Ru | 0.12291  | -1.34798 | -0.81356 |
| C  | 1.09777  | 3.02439  | 1.99293  |
| H  | 1.94120  | 3.71310  | 1.96856  |
| H  | 0.41751  | 3.25982  | 1.16814  |
| H  | 0.54391  | 3.12053  | 2.92870  |
| O  | 0.67689  | 0.71140  | 2.16790  |
| O  | 2.67022  | 1.32462  | 1.33713  |
| C  | -3.76652 | -1.59354 | 1.11873  |
| C  | -2.53609 | -1.90271 | 0.56450  |
| H  | -2.14421 | -2.91456 | 0.58197  |
| N  | -1.75042 | -0.98486 | -0.01847 |
| O  | 1.31799  | -1.56740 | 0.83722  |
| C  | 2.40644  | -1.64326 | 0.13335  |
| O  | 2.27409  | -1.64340 | -1.11385 |
| C  | 3.72563  | -1.68788 | 0.82579  |
| H  | 3.68322  | -2.37665 | 1.67203  |
| H  | 4.51128  | -1.97686 | 0.12858  |
| H  | 3.91079  | -0.67945 | 1.20897  |
| H  | -4.36290 | -2.37124 | 1.58027  |
| C  | -1.18561 | 1.20868  | -0.70057 |
| C  | -1.40522 | 2.56985  | -0.93028 |
| C  | 0.03978  | 0.59564  | -1.05776 |
| C  | -0.40268 | 3.34514  | -1.50002 |
| H  | -2.35350 | 3.03283  | -0.67051 |
| C  | 1.04172  | 1.40244  | -1.61421 |
| H  | 0.98214  | -0.16696 | 1.85047  |
| C  | 0.82113  | 2.75944  | -1.83193 |
| H  | -0.57018 | 4.40197  | -1.68106 |
| H  | 2.00018  | 0.96011  | -1.86753 |
| H  | 1.60946  | 3.36915  | -2.26403 |
| C  | -2.15960 | 0.31201  | -0.07123 |
| C  | -4.20050 | -0.27163 | 1.06519  |
| C  | -3.39111 | 0.68271  | 0.46899  |
| H  | -5.15792 | 0.01217  | 1.48952  |
| H  | -3.70452 | 1.71898  | 0.42850  |

**C'** (without HOAc)

SCF (wB97X-D) Energy = -801.926072648  
 Enthalpy 0K = -801.711973  
 Enthalpy 298K = -801.696094  
 Free Energy 298K = -801.755940  
 Lowest Frequency = 38.4939 cm<sup>-1</sup>  
 Second Frequency = 42.9476 cm<sup>-1</sup>

|    |          |          |          |
|----|----------|----------|----------|
| Ru | 0.70622  | -0.68439 | -0.65478 |
| C  | -3.21643 | -2.35697 | 0.22577  |
| C  | -1.88777 | -2.20032 | -0.13090 |
| H  | -1.26611 | -3.05173 | -0.38869 |
| N  | -1.28158 | -1.00424 | -0.17493 |
| O  | 1.72279  | -1.15459 | 1.05890  |
| C  | 2.85222  | -0.79725 | 0.56739  |
| O  | 2.87471  | -0.40662 | -0.63191 |
| C  | 4.07956  | -0.81367 | 1.42656  |
| H  | 4.02161  | -1.62345 | 2.15511  |
| H  | 4.97085  | -0.91131 | 0.80630  |
| H  | 4.13401  | 0.13355  | 1.97169  |
| H  | -3.65819 | -3.34589 | 0.24719  |
| C  | -1.19359 | 1.34715  | 0.07979  |
| C  | -1.70327 | 2.62409  | 0.33162  |
| C  | 0.16834  | 1.15728  | -0.25936 |
| C  | -0.86734 | 3.73023  | 0.25711  |
| H  | -2.75074 | 2.76578  | 0.58478  |

|   |          |          |          |
|---|----------|----------|----------|
| C | 0.99239  | 2.28993  | -0.32468 |
| C | 0.47906  | 3.55854  | -0.07034 |
| H | -1.26081 | 4.72256  | 0.45221  |
| H | 2.04165  | 2.16745  | -0.57855 |
| H | 1.13220  | 4.42514  | -0.12813 |
| C | -1.98610 | 0.11588  | 0.14699  |
| C | -3.94987 | -1.21919 | 0.55196  |
| C | -3.32944 | 0.01970  | 0.51283  |
| H | -4.99359 | -1.29861 | 0.83775  |
| H | -3.87997 | 0.91649  | 0.77080  |

**D\*** (K<sup>1</sup>)

SCF (wB97X-D) Energy = -1281.59786902  
 Enthalpy 0K = -1281.196122  
 Enthalpy 298K = -1281.170451  
 Free Energy 298K = -1281.250936  
 Lowest Frequency = 32.0699 cm<sup>-1</sup>  
 Second Frequency = 37.3154 cm<sup>-1</sup>

|    |          |          |          |
|----|----------|----------|----------|
| Ru | 0.07247  | -0.50656 | -0.15231 |
| O  | -0.12233 | -2.57744 | -0.66909 |
| C  | -0.74467 | -2.77497 | 0.41962  |
| C  | -1.33737 | -4.10131 | 0.76471  |
| O  | -0.87993 | -1.77205 | 1.20197  |
| H  | -2.37521 | -4.11505 | 0.41760  |
| H  | -0.79286 | -4.90228 | 0.26443  |
| H  | -1.34039 | -4.24661 | 1.84562  |
| C  | -2.55848 | 0.83783  | 0.30605  |
| C  | -3.84416 | 0.71797  | 0.83506  |
| C  | -2.19888 | 0.01815  | -0.77195 |
| C  | -4.74535 | -0.18799 | 0.28374  |
| H  | -4.13642 | 1.29939  | 1.70320  |
| C  | -3.09582 | -0.89323 | -1.32100 |
| C  | -4.37753 | -0.99539 | -0.79080 |
| H  | -5.74037 | -0.27379 | 0.70722  |
| H  | -2.78669 | -1.51288 | -2.15604 |
| H  | -5.08800 | -1.69894 | -1.21089 |
| H  | -1.26951 | 0.22972  | -1.35194 |
| C  | -1.54466 | 1.72106  | 0.92039  |
| C  | -0.90146 | 3.65542  | 2.20007  |
| H  | -1.15687 | 4.57266  | 2.71900  |
| C  | -1.88610 | 2.89883  | 1.58468  |
| H  | -2.92128 | 3.21791  | 1.60298  |
| C  | 0.69347  | 2.05018  | 1.44587  |
| H  | 1.70629  | 1.67205  | 1.37984  |
| C  | 0.41616  | 3.21375  | 2.14055  |
| H  | 1.22063  | 3.75975  | 2.61828  |
| N  | -0.25227 | 1.31826  | 0.83397  |
| C  | 2.00367  | 0.52969  | -1.27897 |
| C  | 2.06222  | 1.93309  | -1.45395 |
| C  | 1.26620  | -0.25884 | -2.19679 |
| C  | 1.34422  | 2.53680  | -2.46115 |
| H  | 2.67255  | 2.52844  | -0.78236 |
| C  | 0.55669  | 0.39010  | -3.23823 |
| C  | 0.57076  | 1.76281  | -3.34861 |
| H  | 1.38486  | 3.61396  | -2.58206 |
| H  | 0.02242  | -0.21545 | -3.96283 |
| H  | 0.01948  | 2.24950  | -4.14588 |
| H  | 1.42018  | -1.33192 | -2.25029 |
| C  | 2.77069  | -0.14934 | -0.19671 |
| C  | 4.61979  | -0.80315 | 1.15649  |
| H  | 5.67944  | -0.78453 | 1.38661  |
| C  | 4.12856  | -0.08549 | 0.06582  |
| H  | 4.78061  | 0.49619  | -0.57562 |
| C  | 2.39120  | -1.55224 | 1.63272  |
| H  | 1.65032  | -2.08685 | 2.21601  |
| C  | 3.74593  | -1.54770 | 1.94276  |
| H  | 4.10296  | -2.11610 | 2.79299  |
| N  | 1.93326  | -0.85638 | 0.58896  |

## XYZ Coordinates and Computed Energies

 $\omega$ B97X-D Optimised Geometries and EnergiesTS ( $D^+-E^+$ ) ( $K^1$ )

SCF ( $\omega$ B97X-D) Energy = -1281.55351714  
 Enthalpy 0K = -1281.157821  
 Enthalpy 298K = -1281.132389  
 Free Energy 298K = -1281.212672  
 Lowest Frequency = -1177.6862  $cm^{-1}$   
 Second Frequency = 34.4799  $cm^{-1}$

|    |          |          |          |
|----|----------|----------|----------|
| Ru | 0.10281  | 0.01648  | -0.34275 |
| O  | 0.72138  | -1.83744 | 1.84349  |
| C  | -0.20556 | -1.08350 | 2.23480  |
| C  | -0.84739 | -1.30970 | 3.56971  |
| O  | -0.67110 | -0.12777 | 1.52115  |
| H  | -1.67671 | -2.00956 | 3.42806  |
| H  | -0.13337 | -1.75602 | 4.26115  |
| H  | -1.24873 | -0.37794 | 3.96786  |
| C  | -2.88435 | -0.43020 | -0.42937 |
| C  | -3.98760 | -0.87836 | 0.29494  |
| C  | -1.88449 | -1.35221 | -0.77717 |
| C  | -4.08861 | -2.21782 | 0.66126  |
| H  | -4.75203 | -0.17639 | 0.61192  |
| C  | -1.98648 | -2.69092 | -0.41330 |
| C  | -3.09115 | -3.12517 | 0.31343  |
| H  | -4.94904 | -2.55237 | 1.23099  |
| H  | -1.21087 | -3.39174 | -0.70021 |
| H  | -3.17674 | -4.16712 | 0.60139  |
| H  | -1.08691 | -1.07828 | -1.50977 |
| C  | -2.69844 | 0.99969  | -0.75210 |
| C  | -3.50497 | 3.17870  | -1.36656 |
| H  | -4.32105 | 3.85085  | -1.60803 |
| C  | -3.75995 | 1.85180  | -1.05208 |
| H  | -4.77158 | 1.46347  | -1.06259 |
| C  | -1.17931 | 2.72928  | -1.08039 |
| H  | -0.13643 | 3.02866  | -1.08583 |
| C  | -2.18757 | 3.62723  | -1.38638 |
| H  | -1.94057 | 4.65113  | -1.63928 |
| N  | -1.42138 | 1.44767  | -0.75938 |
| C  | 2.93414  | -0.44386 | -0.56722 |
| C  | 4.06744  | -0.81670 | -1.28808 |
| C  | 1.77661  | -1.26652 | -0.54719 |
| C  | 4.08033  | -2.02493 | -1.97737 |
| H  | 4.93417  | -0.16453 | -1.33458 |
| C  | 1.83088  | -2.48561 | -1.23828 |
| C  | 2.96541  | -2.86042 | -1.95128 |
| H  | 4.96270  | -2.31520 | -2.53742 |
| H  | 0.97905  | -3.15812 | -1.20053 |
| H  | 2.98490  | -3.80556 | -2.48366 |
| H  | 1.08011  | -1.42181 | 0.64764  |
| C  | 2.83844  | 0.81682  | 0.18607  |
| C  | 3.66897  | 2.68902  | 1.44002  |
| H  | 4.49660  | 3.26961  | 1.83258  |
| C  | 3.91209  | 1.55718  | 0.67513  |
| H  | 4.92542  | 1.22795  | 0.47913  |
| C  | 1.32724  | 2.28747  | 1.20069  |
| H  | 0.28372  | 2.51046  | 1.39149  |
| C  | 2.35438  | 3.05644  | 1.71887  |
| H  | 2.12510  | 3.91864  | 2.33297  |
| N  | 1.56511  | 1.21011  | 0.43530  |

 $E^+$  ( $K^1$ )

SCF ( $\omega$ B97xD) Energy = -1281.56435281  
 Enthalpy 0K = -1281.163440  
 Enthalpy 298K = -1281.137509  
 Free Energy 298K = -1281.219354  
 Lowest Frequency = 29.6633  $cm^{-1}$   
 Second Frequency = 36.0593  $cm^{-1}$

|    |          |          |          |
|----|----------|----------|----------|
| Ru | 0.13015  | 0.08973  | -0.43279 |
| O  | 0.71962  | -1.98048 | 1.84423  |
| C  | -0.20614 | -1.14335 | 2.20029  |

|   |          |          |          |
|---|----------|----------|----------|
| C | -0.86015 | -1.39994 | 3.51446  |
| O | -0.56828 | -0.19029 | 1.48367  |
| H | -1.62047 | -2.17265 | 3.36244  |
| H | -0.13444 | -1.77389 | 4.23707  |
| H | -1.34495 | -0.49449 | 3.87554  |
| C | -2.86502 | -0.55440 | -0.38004 |
| C | -3.88708 | -1.11114 | 0.38818  |
| C | -1.81822 | -1.38361 | -0.81471 |
| C | -3.86705 | -2.46508 | 0.71263  |
| H | -4.68492 | -0.48014 | 0.76658  |
| C | -1.80317 | -2.73866 | -0.49708 |
| C | -2.82717 | -3.28106 | 0.27454  |
| H | -4.66675 | -2.88300 | 1.31504  |
| H | -0.99796 | -3.37044 | -0.85414 |
| H | -2.81837 | -4.33645 | 0.52406  |
| H | -1.08224 | -1.02329 | -1.57392 |
| C | -2.82095 | 0.89643  | -0.66726 |
| C | -3.85261 | 2.99994  | -1.19766 |
| H | -4.73603 | 3.59688  | -1.39634 |
| C | -3.97037 | 1.64718  | -0.91084 |
| H | -4.94062 | 1.16426  | -0.90221 |
| C | -1.48719 | 2.76338  | -0.99628 |
| H | -0.47796 | 3.16178  | -1.03124 |
| C | -2.58482 | 3.57110  | -1.24666 |
| H | -2.44393 | 4.61949  | -1.48047 |
| N | -1.59327 | 1.45906  | -0.70035 |
| C | 2.99920  | -0.34293 | -0.55083 |
| C | 4.21723  | -0.81919 | -1.03573 |
| C | 1.78929  | -1.06977 | -0.72216 |
| C | 4.26787  | -2.04591 | -1.68883 |
| H | 5.12905  | -0.24003 | -0.92475 |
| C | 1.88563  | -2.30337 | -1.38582 |
| C | 3.10277  | -2.78802 | -1.86249 |
| H | 5.21388  | -2.41953 | -2.06534 |
| H | 0.99209  | -2.90237 | -1.54328 |
| H | 3.14215  | -3.74428 | -2.37462 |
| H | 1.05820  | -1.70415 | 0.94434  |
| C | 2.85798  | 0.93373  | 0.16277  |
| C | 3.60924  | 2.86328  | 1.38907  |
| H | 4.41321  | 3.47150  | 1.78909  |
| C | 3.89719  | 1.71379  | 0.66918  |
| H | 4.92425  | 1.40643  | 0.51504  |
| C | 1.28871  | 2.41154  | 1.07629  |
| H | 0.23606  | 2.62555  | 1.22285  |
| C | 2.27964  | 3.21586  | 1.60955  |
| H | 2.01198  | 4.09314  | 2.18555  |
| N | 1.56774  | 1.31306  | 0.35534  |

 $D^+$  ( $K^2$ )

SCF ( $\omega$ B97X-D) Energy = -1281.59084445  
 Enthalpy 0K = -1281.189536  
 Enthalpy 298K = -1281.163829  
 Free Energy 298K = -1281.244617  
 Lowest Frequency = 27.8340  $cm^{-1}$   
 Second Frequency = 40.4578  $cm^{-1}$

|    |          |          |          |
|----|----------|----------|----------|
| Ru | 0.27764  | 0.75780  | 0.03348  |
| O  | 1.13925  | 2.33204  | 1.18268  |
| C  | 1.15845  | 3.10387  | 0.16818  |
| C  | 1.66016  | 4.50892  | 0.27502  |
| O  | 0.71177  | 2.63825  | -0.92886 |
| H  | 2.09330  | 4.82869  | -0.67329 |
| H  | 0.81682  | 5.16780  | 0.50324  |
| H  | 2.38653  | 4.59159  | 1.08381  |
| C  | -2.42987 | -0.10065 | 0.93982  |
| C  | -3.74080 | -0.47799 | 0.65251  |
| C  | -1.95538 | 1.12642  | 0.44161  |
| C  | -4.56067 | 0.36513  | -0.09448 |
| H  | -4.12126 | -1.43842 | 0.98466  |
| C  | -2.77594 | 1.97353  | -0.30105 |

## XYZ Coordinates and Computed Energies

 $\omega$ B97X-D Optimised Geometries and Energies

C -4.08588 1.58747 -0.57051  
H -5.57942 0.06212 -0.31169  
H -2.38229 2.91665 -0.66356  
H -4.73606 2.23548 -1.14790  
H -1.05393 1.60578 0.94035  
C -1.48398 -0.94182 1.69674  
C -0.91373 -2.54892 3.38877  
H -1.20596 -3.26897 4.14508  
C -1.87794 -1.87008 2.65763  
H -2.93215 -2.02898 2.85123  
C 0.75631 -1.33621 2.18597  
H 1.78473 -1.06848 1.97664  
C 0.42877 -2.26513 3.15923  
H 1.21480 -2.74562 3.72910  
N -0.17108 -0.70634 1.44904  
C 1.94688 -1.13211 -1.07180  
C 2.62685 -2.14992 -0.39427  
C 2.43064 0.19200 -1.01847  
C 3.75026 -1.84449 0.36176  
H 2.25687 -3.16905 -0.44317  
C 3.54387 0.48647 -0.21248  
C 4.19252 -0.52218 0.48210  
H 4.27825 -2.63752 0.88153  
H 3.91069 1.50595 -0.16708  
H 5.05821 -0.29347 1.09363  
H 2.07335 0.93803 -1.72356  
C 0.70233 -1.40537 -1.82646  
C -0.65227 -2.54090 -3.43549  
H -0.78811 -3.30970 -4.18814  
C 0.56438 -2.40848 -2.77530  
H 1.40602 -3.05321 -3.00126  
C -1.47611 -0.68993 -2.15730  
H -2.25338 0.01421 -1.88978  
C -1.68254 -1.66041 -3.12731  
H -2.64069 -1.71614 -3.62969  
N -0.31014 -0.57050 -1.50625

TS ( $D^+-E^+$ ) ( $K^2$ )

SCF ( $\omega$ B97X-D) Energy = -1281.55634948  
Enthalpy 0K = -1281.160437  
Enthalpy 298K = -1281.134910  
Free Energy 298K = -1281.215529  
Lowest Frequency = -1277.5340  $cm^{-1}$   
Second Frequency = 21.4066  $cm^{-1}$

Ru 0.01426 0.68614 -0.01114  
O 0.84995 2.44311 -1.20698  
C 0.55743 3.23598 -0.19529  
C 0.70295 4.70434 -0.39809  
O 0.16371 2.71305 0.86309  
H 0.07582 5.01673 -1.23721  
H 0.42171 5.24325 0.50509  
H 1.73823 4.92815 -0.66830  
C 2.43330 -0.83153 -0.62529  
C 3.69481 -1.38862 -0.42263  
C 2.06653 0.36628 0.03309  
C 4.60993 -0.75367 0.41271  
H 3.97201 -2.32595 -0.89442  
C 3.00352 0.98678 0.86988  
C 4.26879 0.43358 1.05572  
H 5.59075 -1.19110 0.56500  
H 2.73422 1.90313 1.38754  
H 4.98553 0.92399 1.70623  
H 1.47675 1.46625 -0.74359  
C 1.39522 -1.44531 -1.46714  
C 0.56535 -2.93132 -3.16731  
H 0.72655 -3.72970 -3.88332  
C 1.61217 -2.47566 -2.38054  
H 2.60261 -2.90040 -2.48888  
C -0.84231 -1.31712 -2.11433

H -1.79147 -0.81205 -1.98294  
C -0.68480 -2.33360 -3.04035  
H -1.52574 -2.64026 -3.65033  
N 0.16167 -0.89219 -1.33126  
C -2.59865 -0.28496 0.71078  
C -3.51090 -1.01871 -0.05456  
C -2.51131 1.10801 0.53961  
C -4.28701 -0.37883 -1.01359  
H -3.58467 -2.09323 0.08172  
C -3.27556 1.73547 -0.45062  
C -4.15094 0.99356 -1.23404  
H -4.99216 -0.95375 -1.60486  
H -3.20667 2.81101 -0.57541  
H -4.74913 1.48270 -1.99497  
H -1.95673 1.71500 1.25022  
C -1.69068 -0.96166 1.66580  
C -1.17519 -2.45005 3.47034  
H -1.48307 -3.15863 4.23128  
C -2.11482 -1.87218 2.62516  
H -3.17062 -2.10247 2.71065  
C 0.52017 -1.18498 2.34864  
H 1.54881 -0.88203 2.19939  
C 0.16167 -2.09468 3.33123  
H 0.92706 -2.51341 3.97332  
N -0.38660 -0.63258 1.52552

 $E^+$  ( $K^2$ )

SCF ( $\omega$ B97X-D) Energy = -1281.57817780  
Enthalpy 0K = -1281.176214  
Enthalpy 298K = -1281.149986  
Free Energy 298K = -1281.232974  
Lowest Frequency = 29.0488  $cm^{-1}$   
Second Frequency = 33.0345  $cm^{-1}$

Ru -0.19611 -0.31516 -0.51601  
O -2.37192 -2.37388 -2.07540  
C -1.40148 -3.01450 -1.45580  
C -1.37707 -4.48329 -1.71793  
O -0.58417 -2.45114 -0.72316  
H -0.51236 -4.93507 -1.23625  
H -2.29741 -4.93293 -1.33577  
H -1.35191 -4.66245 -2.79558  
C -2.19656 1.70391 0.02061  
C -3.42499 2.28144 0.34511  
C -2.03267 0.29691 -0.02240  
C -4.51935 1.47788 0.64622  
H -3.54176 3.36046 0.37536  
C -3.14759 -0.48468 0.31927  
C -4.37624 0.09449 0.64157  
H -5.47278 1.93006 0.89580  
H -3.06059 -1.56835 0.37079  
H -5.22044 -0.53902 0.89614  
H -2.42590 -1.45388 -1.75638  
C -0.98579 2.48591 -0.26854  
C 0.29424 4.49209 -0.63188  
H 0.35825 5.57400 -0.67530  
C -0.90932 3.87668 -0.32190  
H -1.79193 4.47400 -0.12999  
C 1.27724 2.32922 -0.82858  
H 2.11190 1.67192 -1.03785  
C 1.41003 3.70489 -0.89864  
H 2.36613 4.14115 -1.16055  
N 0.11920 1.72881 -0.50687  
C 2.65901 -0.54435 0.43080  
C 3.75366 0.31914 0.53492  
C 2.39730 -1.17507 -0.79493  
C 4.55536 0.57018 -0.57388  
H 3.95736 0.81986 1.47629  
C 3.19340 -0.90361 -1.90800  
C 4.26896 -0.02707 -1.80115

## XYZ Coordinates and Computed Energies

```
H 5.40069 1.24416 -0.48319
H 2.98594 -1.40085 -2.84975
H 4.89282 0.17766 -2.66437
H 1.63283 -1.94705 -0.85800
C 1.77341 -0.76272 1.59842
C 1.41464 -1.21080 3.93295
H 1.79844 -1.41546 4.92624
C 2.28328 -1.01778 2.86805
H 3.35711 -1.08278 3.00016
C -0.40292 -0.88681 2.41295
H -1.45742 -0.81218 2.18469
C 0.04673 -1.14668 3.69651
H -0.67423 -1.29209 4.49181
N 0.43839 -0.69113 1.38058
```

**D<sup>+</sup>** ( $\eta^6$ )

```
SCF (wB97X-D) Energy = -1281.60720683
Enthalpy 0K = -1281.205053
Enthalpy 298K = -1281.179558
Free Energy 298K = -1281.260352
Lowest Frequency = 15.1794 cm-1
Second Frequency = 39.1796 cm-1
```

```
Ru -1.32163 0.16826 -0.62955
O -2.85990 1.33783 0.24579
C -3.30804 0.33715 0.89503
C -4.42106 0.47620 1.87830
O -2.73006 -0.77345 0.68197
H -3.99962 0.77209 2.84402
H -5.11325 1.25448 1.55524
H -4.93833 -0.47521 2.00213
C 0.88677 -1.48208 1.37033
C 2.16911 -1.92276 1.02917
C -0.18257 -2.38149 1.33421
C 2.37242 -3.23233 0.60398
H 3.00224 -1.22751 1.06525
C 0.02566 -3.69197 0.91648
C 1.29823 -4.11698 0.53824
H 3.36890 -3.56266 0.32952
H -0.80789 -4.38652 0.89768
H 1.45582 -5.13963 0.21169
H -1.17524 -2.05545 1.62201
C 0.70394 -0.06415 1.76903
C 1.38440 1.79749 3.14615
H 2.00588 2.21100 3.93320
C 1.50907 0.46689 2.77767
H 2.21539 -0.18701 3.27537
C -0.32927 2.00210 1.50298
H -1.07357 2.57869 0.96974
C 0.44135 2.58152 2.49454
H 0.29771 3.62667 2.74002
N -0.21046 0.71004 1.13782
C 0.52586 0.31496 -1.85505
C 0.12967 -1.05374 -1.77139
C -0.41318 1.28951 -2.27865
C -1.19150 -1.42647 -2.10881
H 0.80339 -1.79533 -1.35959
C -1.73272 0.89233 -2.63626
C -2.12917 -0.46278 -2.57408
H -1.51195 -2.44675 -1.93094
H -2.46958 1.65369 -2.86621
H -3.15395 -0.74590 -2.77793
H -0.12933 2.33429 -2.26205
C 1.87713 0.75226 -1.40558
C 4.23093 0.40839 -1.16626
H 5.12411 -0.18960 -1.31276
C 2.99382 -0.05635 -1.60274
H 2.90518 -1.01873 -2.09427
C 3.12483 2.38687 -0.40739
H 3.13946 3.36695 0.06132
```

 $\omega$ B97X-D Optimised Geometries and Energies

```
C 4.29920 1.64791 -0.54435
H 5.24051 2.04630 -0.18375
N 1.93849 1.96037 -0.83422
```

**TS (D<sup>+</sup>-E<sup>+</sup>)** ( $\eta^6$ )

```
SCF (wB97X-D) Energy = -1281.57865237
Enthalpy 0K = -1281.177677
Enthalpy 298K = -1281.152433
Free Energy 298K = -1281.233627
Lowest Frequency = -98.1259 cm-1
Second Frequency = 15.0295 cm-1
```

```
Ru 0.53682 -0.68549 -0.27276
O 0.65941 -1.83984 1.43399
C 1.87019 -2.29249 1.59867
C 2.05505 -3.19248 2.79468
O 2.79304 -1.98970 0.83732
H 3.06920 -3.58917 2.81176
H 1.86822 -2.62440 3.71005
H 1.33066 -4.00967 2.76522
C 1.49303 2.05240 0.33895
C 1.66560 3.08308 -0.58541
C 2.46521 1.04422 0.44964
C 2.79343 3.09276 -1.40263
H 0.91470 3.86210 -0.67792
C 3.58917 1.05680 -0.37814
C 3.75043 2.07957 -1.30721
H 2.92702 3.89478 -2.12128
H 4.32587 0.26780 -0.27340
H 4.62590 2.10192 -1.94745
H 2.40519 0.29781 1.23818
C 0.27204 1.91894 1.16479
C -1.37937 2.64878 2.73635
H -1.81218 3.41974 3.36465
C -0.26590 2.92951 1.95163
H 0.20470 3.90581 1.96487
C -1.33592 0.40451 1.90956
H -1.70804 -0.61141 1.85039
C -1.91394 1.36458 2.72611
H -2.76614 1.10242 3.34108
N -0.28523 0.69093 1.13002
C -1.24254 -0.74324 -1.49998
C -0.35401 0.22484 -2.07501
C -0.75646 -2.06402 -1.25824
C 0.97576 -0.12414 -2.35286
H -0.65722 1.25974 -2.17396
C 0.57800 -2.42839 -1.60995
C 1.44812 -1.45809 -2.12444
H 1.67704 0.64779 -2.64973
H 0.95681 -3.40711 -1.34256
H 2.50024 -1.68475 -2.24285
H -1.40580 -2.76026 -0.74177
C -2.62900 -0.38871 -1.08183
C -4.58725 0.98441 -1.16738
H -5.13344 1.83519 -1.56028
C -3.29225 0.71977 -1.60423
H -2.83246 1.35202 -2.35505
C -4.42834 -0.95514 0.21729
H -4.85054 -1.65084 0.93720
C -5.16851 0.13592 -0.23533
H -6.17597 0.30224 0.12799
N -3.18885 -1.21585 -0.19066
```

**E<sup>+</sup>** ( $\eta^6$ )

```
SCF (wB97X-D) Energy = -1281.59826073
Enthalpy 0K = -1281.196238
Enthalpy 298K = -1281.170509
Free Energy 298K = -1281.253104
Lowest Frequency = 15.7734 cm-1
Second Frequency = 20.4594 cm-1
```

## XYZ Coordinates and Computed Energies

 $\omega$ B97X-D Optimised Geometries and Energies

```

Ru  0.29096 -0.83875 -0.01359
O   0.98068 -0.61740  2.03214
C   2.07225 -0.39975  2.56805
C   2.21387 -0.30179  4.05258
O   3.19139 -0.23752  1.90970
H   2.58081  0.69424  4.31341
H   1.25575 -0.48637  4.53391
H   2.95900 -1.02323  4.39623
C   2.12096  1.26744 -0.98710
C   3.22062  1.86503 -1.60680
C   2.03906 -0.13588 -0.82495
C   4.27203  1.08122 -2.06630
H   3.26947  2.94214 -1.73375
C   3.12356 -0.89717 -1.28349
C   4.22641 -0.29910 -1.89560
H   5.12623  1.54582 -2.54609
H   3.11819 -1.97691 -1.16075
H   5.05041 -0.91594 -2.24024
H   3.02823 -0.28874  0.94311
C   1.00329  2.02273 -0.41120
C  -0.18316  3.98811  0.30570
H  -0.27053  5.06769  0.36496
C   0.90115  3.41196 -0.33815
H   1.67322  4.03479 -0.77267
C  -0.99527  1.79537  0.78043
H  -1.71088  1.10784  1.21790
C  -1.14510  3.16701  0.88774
H  -1.99757  3.57496  1.41679
N   0.03791  1.24026  0.12830
C  -1.93431 -1.32525 -0.50070
C  -1.08105 -1.22254 -1.65662
C  -1.54498 -2.16376  0.55083
C   0.05415 -2.05409 -1.79263
H  -1.30809 -0.51064 -2.44075
C  -0.33268 -2.91167  0.44977
C   0.42933 -2.93197 -0.73570
H   0.67951 -1.96691 -2.67306
H   0.00470 -3.48297  1.30727
H   1.32049 -3.54193 -0.80865
H  -2.13334 -2.17732  1.45942
C  -3.18185 -0.52097 -0.38795
C  -5.06277  0.60895 -1.34759
H  -5.63646  0.93373 -2.20897
C  -3.88566 -0.11348 -1.52003
H  -3.54526 -0.37469 -2.51559
C  -4.72322  0.43821  1.01017
H  -5.02735  0.63640  2.03439
C  -5.49245  0.89428 -0.05895
H  -6.40449  1.45125  0.12173
N  -3.59446 -0.25115  0.85821

```

**D**

```

SCF (wB97X-D) Energy = -1510.23153545
Enthalpy 0K = -1509.779421
Enthalpy 298K = -1509.748256
Free Energy 298K = -1509.842455
Lowest Frequency = 18.4317 cm-1
Second Frequency = 24.2832 cm-1

```

```

Ru  1.03879  0.14624 -0.28346
O   2.32121  1.39909 -1.50775
C   2.11611  0.62064 -2.48374
C   2.86682  0.77691 -3.77357
O   1.27921 -0.32773 -2.33834
H   2.26667  0.41681 -4.61039
H   3.15342  1.81863 -3.92254
H   3.77631  0.17161 -3.71588
C  -2.27986 -0.22115 -1.22174
C  -3.28007 -0.77257 -0.41877

```

```

C  -1.73994 -0.97520 -2.26636
C  -3.72980 -2.06904 -0.64870
H  -3.68951 -0.18865  0.40100
C  -2.20505 -2.26378 -2.50441
C  -3.19928 -2.81312 -1.69862
H  -4.49462 -2.49629 -0.00792
H  -1.78234 -2.84215 -3.31988
H  -3.55592 -3.82155 -1.88435
H  -0.93965 -0.55978 -2.86845
C  -1.86520  1.19274 -1.02787
C  -2.48121  3.52468 -1.04900
H  -3.23135  4.30425 -1.13264
C  -2.83925  2.18854 -1.13383
H  -3.86740  1.89270 -1.30841
C  -0.22744  2.80111 -0.76363
H   0.82889  2.99418 -0.62443
C  -1.13851  3.83694 -0.88181
H  -0.79200  4.86243 -0.83242
N  -0.57017  1.49974 -0.80420
C  -0.55856  0.34464  2.24688
C  -1.49988  0.99801  3.04120
C   0.57396  1.04124  1.79008
C  -1.29846  2.32460  3.41047
H  -2.40313  0.48152  3.35357
C   0.78599  2.35706  2.19733
C  -0.15227  3.00154  2.99721
H  -2.03607  2.83015  4.02563
H   1.69161  2.86572  1.88285
H   0.00959  4.03022  3.30377
H   1.52391  0.45930  1.48032
C  -0.71260 -1.04344  1.78807
C  -1.44672 -3.31978  1.97503
H  -1.97916 -4.10235  2.50531
C  -1.40749 -2.03016  2.48300
H  -1.88327 -1.78615  3.42589
C  -0.10333 -2.57239  0.14434
H   0.43767 -2.72100 -0.78260
C  -0.77868 -3.59674  0.78656
H  -0.77704 -4.59104  0.35637
N  -0.08275 -1.32082  0.62363
O   2.65087 -1.12906 -0.06322
C   3.32879 -1.18292  1.03408
C   4.51845 -2.12607  0.97364
O   3.08490 -0.54024  2.06008
H   4.21213 -3.09614  0.57466
H   5.26758 -1.71348  0.29154
H   4.95819 -2.24641  1.96385

```

**TS (D-E)**

```

SCF (wB97X-D) Energy = -1510.19384855
Enthalpy 0K = -1509.746329
Enthalpy 298K = -1509.715342
Free Energy 298K = -1509.808936
Lowest Frequency = -1250.9548 cm-1
Second Frequency = 25.0805 cm-1

```

```

Ru -0.82326 -0.20278  0.64539
O  -2.02400  0.45123  2.31485
C  -1.21600 -0.06983  3.14235
C  -1.54107 -0.08327  4.61058
O  -0.15084 -0.60763  2.71153
H  -2.13757  0.79096  4.87502
H  -2.13203 -0.97828  4.82756
H  -0.62667 -0.12081  5.20399
C   2.43496  1.02833  0.42929
C   3.33669  0.90921 -0.63092
C   2.62198  0.26318  1.58339
C   4.41044  0.02935 -0.54360
H   3.18291  1.49371 -1.53353
C   3.70534 -0.60474  1.67186

```



## XYZ Coordinates and Computed Energies

 $\omega$ B97X-D Optimised Geometries and Energies

C 4.60122 -0.72351 0.61192  
H 5.09671 -0.06819 -1.37878  
H 3.84592 -1.19267 2.57345  
H 5.44444 -1.40348 0.68476  
H 1.90407 0.32983 2.39384  
C 1.35450 2.04513 0.37470  
C 0.75822 4.37467 0.15195  
H 1.03146 5.40565 -0.04698  
C 1.71244 3.37150 0.11654  
H 2.75415 3.59655 -0.08119  
C -0.84173 2.69546 0.70663  
H -1.84500 2.37680 0.95696  
C -0.54668 4.02726 0.47783  
H -1.33505 4.76710 0.54884  
N 0.07131 1.70447 0.62732  
C -0.89334 0.20799 -2.27516  
C -1.11738 0.91171 -3.45715  
C -1.79054 0.31431 -1.18824  
C -2.25785 1.69947 -3.58727  
H -0.40585 0.86453 -4.27678  
C -2.93891 1.09552 -1.35468  
C -3.17484 1.78464 -2.54181  
H -2.43262 2.24468 -4.50965  
H -3.65272 1.15640 -0.53671  
H -4.07006 2.38904 -2.65430  
H -2.09452 -0.84960 -0.47767  
C 0.26562 -0.67136 -2.05269  
C 2.07280 -2.10242 -2.72990  
H 2.70551 -2.52324 -3.50439  
C 1.07894 -1.19321 -3.05644  
H 0.90361 -0.91552 -4.08907  
C 1.39884 -1.91963 -0.45007  
H 1.48071 -2.16551 0.60224  
C 2.22732 -2.48607 -1.40221  
H 2.97809 -3.20612 -1.10078  
N 0.46059 -1.01531 -0.75765  
O -2.22796 -1.86201 0.37102  
C -1.76392 -3.02018 -0.09219  
C -1.59291 -4.05290 1.00112  
O -1.50450 -3.23220 -1.25950  
H -1.23388 -4.99332 0.58315  
H -0.88308 -3.67051 1.74112  
H -2.54454 -4.20879 1.51565

**E**

SCF ( $\omega$ B97X-D) Energy = -1510.22502637  
Enthalpy 0K = -1509.771997  
Enthalpy 298K = -1509.740527  
Free Energy 298K = -1509.836658  
Lowest Frequency = 14.6062  $\text{cm}^{-1}$   
Second Frequency = 17.2370  $\text{cm}^{-1}$

Ru 0.73903 0.36678 0.13378  
O 1.98168 1.33861 1.59531  
C 1.34543 2.44020 1.61883  
C 1.79883 3.53369 2.55411  
O 0.33760 2.61319 0.88077  
H 1.06179 3.64474 3.35489  
H 2.77034 3.29735 2.98825  
H 1.84608 4.48346 2.01684  
C -2.61164 0.08284 0.89859  
C -3.60950 -0.63294 0.23396  
C -2.55829 1.47398 0.77003  
C -4.53551 0.02950 -0.56588  
H -3.64441 -1.71467 0.32633  
C -3.49520 2.13379 -0.01911  
C -4.48295 1.41515 -0.69031  
H -5.29656 -0.53776 -1.09224  
H -3.44976 3.21464 -0.10981  
H -5.21108 1.93415 -1.30619

H -1.76911 2.03104 1.26421  
C -1.68934 -0.61452 1.83014  
C -1.43924 -1.96088 3.81912  
H -1.86870 -2.55214 4.62104  
C -2.24904 -1.37539 2.85955  
H -3.32807 -1.46910 2.90439  
C 0.42484 -0.99317 2.68705  
H 1.48429 -0.80443 2.58521  
C -0.07023 -1.74233 3.73960  
H 0.61748 -2.14807 4.47208  
N -0.35028 -0.45967 1.71878  
C 1.00158 -2.28344 -1.06273  
C 1.50921 -3.56393 -1.30268  
C 1.61197 -1.39714 -0.14128  
C 2.65396 -3.99097 -0.64247  
H 1.02312 -4.23429 -2.00740  
C 2.78253 -1.85433 0.48943  
C 3.29521 -3.12611 0.24595  
H 3.05145 -4.98414 -0.82589  
H 3.29947 -1.19636 1.18704  
H 4.20146 -3.45010 0.75172  
H 3.02243 0.85091 -1.19983  
C -0.14393 -1.70884 -1.77180  
C -1.86436 -1.63511 -3.45919  
H -2.42574 -2.11192 -4.25642  
C -0.86820 -2.32993 -2.79314  
H -0.63153 -3.35000 -3.07210  
C -1.39248 0.23404 -2.05799  
H -1.58386 1.24160 -1.70871  
C -2.12294 -0.31632 -3.09680  
H -2.88843 0.27372 -3.58613  
N -0.43966 -0.43551 -1.39302  
O 2.13214 1.18459 -1.38716  
C 2.24642 2.43558 -1.93982  
C 0.91268 3.04809 -2.22682  
O 3.33163 2.90613 -2.14811  
H 0.39313 3.20499 -1.27587  
H 1.05976 3.99206 -2.74892  
H 0.31557 2.36325 -2.83377

**E** (without HOAc)

SCF ( $\omega$ B97X-D) Energy = -1281.18852399  
Enthalpy 0K = -1280.800337  
Enthalpy 298K = -1280.774667  
Free Energy 298K = -1280.856045  
Lowest Frequency = 29.6866  $\text{cm}^{-1}$   
Second Frequency = 35.7005  $\text{cm}^{-1}$

Ru -0.25838 -0.73067 -0.10231  
O -0.75090 -2.73641 0.59580  
C -1.05398 -3.06715 -0.59431  
C -1.63893 -4.42216 -0.88084  
O -0.89026 -2.22547 -1.52727  
H -1.43139 -4.71633 -1.91039  
H -1.24841 -5.16135 -0.17974  
H -2.72408 -4.36547 -0.75052  
C 2.68199 -0.09357 0.66347  
C 3.78982 0.64818 0.24509  
C 2.37402 -1.28645 -0.00387  
C 4.56388 0.21401 -0.82667  
H 4.02078 1.59130 0.73098  
C 3.14230 -1.71341 -1.08276  
C 4.23892 -0.96256 -1.49849  
H 5.41395 0.80671 -1.14939  
H 2.87474 -2.63055 -1.59634  
H 4.83686 -1.29105 -2.34226  
H 1.56349 -1.92807 0.35998  
C 1.80863 0.40324 1.75310  
C 1.49687 1.46680 3.88897  
H 1.89906 1.93535 4.78084

## XYZ Coordinates and Computed Energies

```

C 2.34241 1.00692 2.89028
H 3.41899 1.09042 2.98771
C -0.34135 0.68432 2.57376
H -1.40011 0.53205 2.40297
C 0.12722 1.29933 3.72312
H -0.58065 1.63503 4.47192
N 0.47145 0.24137 1.59516
C -2.29911 1.26366 -0.51161
C -3.53532 1.91047 -0.40178
C -2.07777 -0.00919 0.06930
C -4.57921 1.30366 0.28149
H -3.69242 2.88963 -0.84738
C -3.15747 -0.60356 0.74642
C -4.38489 0.04236 0.85133
H -5.53855 1.80376 0.36841
H -3.01868 -1.58214 1.19927
H -5.20319 -0.43828 1.38199
C -1.14992 1.81046 -1.23446
C 0.01276 3.39758 -2.62829
H 0.03365 4.33299 -3.17821
C -1.12634 3.01723 -1.93882
H -2.00798 3.64705 -1.94960
C 1.04519 1.37647 -1.89373
H 1.87835 0.68442 -1.85983
C 1.12141 2.55500 -2.61542
H 2.03032 2.79889 -3.15269
N -0.04767 1.01010 -1.20457

```

**3D+**

```

SCF (wB97X-D) Energy = -1679.81781561
Enthalpy 0K = -1679.272031
Enthalpy 298K = -1679.231939
Free Energy 298K = -1679.345742
Lowest Frequency = 23.4779 cm-1
Second Frequency = 28.4121 cm-1

```

```

Ru 0.23298 0.92178 0.45406
C 1.25489 -1.90806 -1.44547
C 0.45070 -3.02740 -1.21368
C 2.60543 -1.95450 -1.10205
C 0.97516 -4.15248 -0.58720
H -0.59049 -3.02391 -1.52188
C 3.12959 -3.08233 -0.47777
C 2.31533 -4.17868 -0.20997
H 0.33777 -5.01098 -0.40246
H 4.18345 -3.11012 -0.21926
H 2.72816 -5.05990 0.27056
H 3.24077 -1.11171 -1.34740
C 0.71397 -0.75435 -2.22481
C 0.12335 0.05921 -4.42630
H 0.05776 -0.08286 -5.49960
C 0.62589 -0.93819 -3.60801
H 0.96726 -1.88049 -4.02003
C -0.17684 1.36179 -2.45538
H -0.49611 2.27162 -1.96576
C -0.28612 1.24328 -3.82838
H -0.68442 2.06848 -4.40687
N 0.30232 0.39703 -1.64444
C -2.71060 -1.07978 0.25375
C -2.64304 -0.91262 -1.13010
C -3.90813 -0.78530 0.91334
C -3.74079 -0.43534 -1.83849
H -1.73174 -1.15340 -1.66018
C -5.00759 -0.30862 0.20626
C -4.92552 -0.12995 -1.17339
H -3.67210 -0.31739 -2.91518
H -5.93278 -0.09007 0.73051
H -5.78713 0.22719 -1.72884
H -3.97430 -0.92785 1.98812
C -1.58762 -1.66181 1.04060

```

## ωB97X-D Optimised Geometries and Energies

```

C -0.85441 -3.48514 2.44642
H -1.04830 -4.42523 2.95197
C -1.84169 -2.87080 1.69315
H -2.82169 -3.32077 1.58388
C 0.57952 -1.67418 1.84859
H 1.53934 -1.17004 1.85668
C 0.38686 -2.87079 2.51684
H 1.21051 -3.30711 3.06898
N -0.38013 -1.05727 1.12773
O 2.20881 0.38714 0.84563
C 3.26592 0.73916 0.18210
C 4.55522 0.34476 0.88565
O 3.28750 1.29878 -0.91418
H 4.57786 -0.74194 1.01362
H 5.42071 0.66269 0.30451
H 4.59312 0.78837 1.88426
N 0.98906 2.75550 -0.04126
C 1.67543 3.61322 -0.38601
C 2.64922 4.58222 -0.85943
H 2.93623 5.26293 -0.05583
H 3.51929 4.00801 -1.19100
H 2.24535 5.15642 -1.69528
N 0.20938 1.44112 2.42516
C 0.26865 1.68589 3.54951
C 0.35807 1.99225 4.97071
H 0.06090 3.02795 5.14815
H -0.29967 1.32866 5.53598
H 1.38630 1.85182 5.31098
N -1.65260 1.68385 0.25575
C -2.64521 2.26543 0.16791
C -3.90369 2.98917 0.05833
H -3.73634 4.05839 0.20503
H -4.33793 2.81643 -0.92836
H -4.60124 2.62113 0.81336

```

## INT (3D+)

```

SCF (wB97X-D) Energy = -1679.79669129
Enthalpy 0K = -1679.251386
Enthalpy 298K = -1679.211136
Free Energy 298K = -1679.325834
Lowest Frequency = 23.5847 cm-1
Second Frequency = 30.1154 cm-1

```

```

Ru 0.31147 0.78616 0.28207
C -2.06232 -0.89246 -1.57255
C -1.41715 -2.01496 -2.06587
C -1.43517 0.36898 -1.68368
C -0.15376 -1.90945 -2.66698
H -1.90936 -2.97974 -1.99473
C -0.17612 0.47005 -2.27651
C 0.46625 -0.68132 -2.77549
H 0.32384 -2.79907 -3.06532
H 0.24089 1.45284 -2.46590
H 1.43561 -0.59054 -3.25570
H -1.93744 1.28272 -1.37389
C -3.39754 -1.01310 -0.93555
C -5.61679 -0.19403 -0.51684
H -6.39408 0.55127 -0.65194
C -4.37149 -0.02261 -1.10692
H -4.16084 0.85220 -1.71182
C -4.82205 -2.26586 0.36002
H -4.96675 -3.17467 0.93920
C -5.85289 -1.33977 0.23741
H -6.81167 -1.52013 0.71011
N -3.62229 -2.11834 -0.20734
C 2.94987 -1.56090 0.09935
C 2.75600 -2.79725 -0.51919
C 3.05568 -1.49735 1.48930
C 2.63249 -3.95187 0.24704
H 2.68999 -2.84951 -1.60168

```

## XYZ Coordinates and Computed Energies

 $\omega$ B97X-D Optimised Geometries and Energies

```

C 2.93588 -2.65123 2.25523
C 2.71697 -3.87988 1.63627
H 2.48407 -4.91045 -0.24051
H 3.02573 -2.59583 3.33532
H 2.63315 -4.78242 2.23320
H 3.23391 -0.53896 1.96451
C 3.15602 -0.34336 -0.72595
C 4.57450 0.80809 -2.30529
H 5.43991 0.82844 -2.95902
C 4.27309 -0.32354 -1.56411
H 4.90709 -1.20185 -1.60039
C 2.65027 1.82885 -1.32940
H 1.97260 2.66369 -1.19195
C 3.75228 1.91726 -2.16296
H 3.94620 2.84341 -2.69087
N 2.31919 0.71688 -0.64017
O 0.34835 2.83418 -0.10065
C -0.67885 3.58590 -0.38068
C -0.32766 5.06188 -0.44766
O -1.82713 3.19698 -0.58265
H -1.20182 5.64562 -0.73398
H 0.03916 5.39968 0.52546
H 0.47659 5.22447 -1.17061
N -1.50669 0.96753 1.17172
C -2.54502 1.10706 1.64597
C -3.87509 1.33261 2.18683
H -3.81323 1.59173 3.24554
H -4.33693 2.15559 1.63636
H -4.47959 0.43134 2.06262
N 1.15675 1.25460 2.00689
C 1.63401 1.63117 2.98541
C 2.24805 2.11200 4.21522
H 3.29447 1.80123 4.25396
H 2.19850 3.20259 4.24641
H 1.72046 1.70349 5.07965
N 0.11118 -1.20545 0.69705
C -0.27503 -2.27728 0.86836
C -0.83084 -3.61196 1.01184
H -0.77218 -3.93818 2.05201
H -1.87443 -3.56325 0.67997
H -0.26667 -4.30668 0.38670

```

TS( ${}^3D^+ \rightarrow {}^3E^+$ ) (\* single point)

SCF (wB97xD) Energy = -1679.75418333  
 Enthalpy 0K = -1679.217108  
 Enthalpy 298K = -1679.180823  
 Free Energy 298K = -1679.279942  
 Lowest Frequency = -1261.0555  $\text{cm}^{-1}$   
 Second Frequency = 49.5529  $\text{cm}^{-1}$

${}^3E^+$

SCF (wB97X-D) Energy = -1679.78218743  
 Enthalpy 0K = -1679.236663  
 Enthalpy 298K = -1679.196662  
 Free Energy 298K = -1679.311253  
 Lowest Frequency = 18.9951  $\text{cm}^{-1}$   
 Second Frequency = 25.0306  $\text{cm}^{-1}$

```

Ru -0.24433 -0.85491 0.38274
C 1.60719 0.80324 -1.61094
C 1.83548 1.41196 -2.85533
C 0.45909 0.00285 -1.38424
C 0.97127 1.23152 -3.92564
H 2.71902 2.03288 -2.97971
C -0.34901 -0.21030 -2.52774
C -0.11758 0.38107 -3.76420
H 1.16358 1.71962 -4.87534
H -1.21616 -0.85979 -2.44132
H -0.78995 0.18451 -4.59417
H 1.40694 -1.74678 -1.62889

```

```

C 2.72905 0.98759 -0.63238
C 5.01844 0.49777 -0.04604
H 5.95634 -0.01725 -0.23165
C 3.92565 0.29645 -0.87671
H 3.98689 -0.37719 -1.72527
C 3.67048 2.03150 1.17894
H 3.54085 2.74975 1.98673
C 4.88971 1.38444 1.01941
H 5.71489 1.58974 1.69252
N 2.61347 1.85494 0.37982
C -2.29272 2.06982 -0.13795
C -1.33753 2.63353 -0.98346
C -2.76736 2.81017 0.95018
C -0.83193 3.90231 -0.71653
H -0.99133 2.08976 -1.85202
C -2.27102 4.08382 1.20700
C -1.29504 4.63021 0.37531
H -0.08140 4.32298 -1.37719
H -2.65420 4.65330 2.04835
H -0.90962 5.62625 0.56999
H -3.53095 2.38443 1.59524
C -2.93934 0.75309 -0.41143
C -4.98969 -0.36566 -1.04805
H -6.02337 -0.32903 -1.37489
C -4.27577 0.79877 -0.82403
H -4.73331 1.77048 -0.96831
C -3.02020 -1.55591 -0.43113
H -2.48621 -2.48296 -0.26908
C -4.34182 -1.57589 -0.83763
H -4.84117 -2.52598 -0.98685
N -2.30568 -0.42846 -0.22597
O -0.37037 -2.80243 -0.59566
C 0.46268 -3.33628 -1.33476
C 0.34858 -4.76567 -1.75785
O 1.50528 -2.70979 -1.82106
H 0.09139 -4.79947 -2.82036
H 1.31057 -5.26821 -1.63888
H -0.42167 -5.26989 -1.17734
N 1.59383 -1.38164 1.02595
C 2.62192 -1.69011 1.44878
C 3.92948 -2.06811 1.96484
H 4.37850 -1.21240 2.47301
H 3.83362 -2.90181 2.66368
H 4.57740 -2.36151 1.13597
N -1.11535 -1.79025 2.12580
C -1.61586 -2.27830 3.04394
C -2.25317 -2.89174 4.20214
H -1.77206 -2.54344 5.11849
H -3.31049 -2.61970 4.22898
H -2.16518 -3.97860 4.14288
N -0.04541 0.83200 1.41231
C 0.22255 1.77621 2.01304
C 0.60805 2.98598 2.71893
H 1.31250 2.74302 3.51772
H 1.08215 3.65474 1.99682
H -0.27193 3.47456 3.13981

```

${}^6F2^+$  (\* single point)

SCF (wB97X-D) Energy = -890.854320318  
 Enthalpy 0K = -890.564279  
 Enthalpy 298K = -890.539014  
 Free Energy 298K = -890.616052  
 Lowest Frequency = 73.4098  $\text{cm}^{-1}$   
 Second Frequency = 73.4231  $\text{cm}^{-1}$

${}^3A2^+$  (\* single point)

SCF (wB97X-D) Energy = -724.782615317  
 Enthalpy 0K = -724.534247  
 Enthalpy 298K = -724.516129  
 Free Energy 298K = -724.577820

## XYZ Coordinates and Computed Energies

 $\omega$ B97X-D Optimised Geometries and EnergiesLowest Frequency = 76.7675 cm<sup>-1</sup>Second Frequency = 76.8180 cm<sup>-1</sup>**5F<sup>+</sup>** ( $\kappa^1$ ) (\* single point)

SCF (wB97X-D) Energy = -986.824841951

Enthalpy 0K = -986.530770

Enthalpy 298K = -986.504783

Free Energy 298K = -986.583452

Lowest Frequency = 71.3830 cm<sup>-1</sup>Second Frequency = 72.7236 cm<sup>-1</sup>**4F<sup>+</sup>** ( $\kappa^2$ ) (\* single point)

SCF (wB97X-D) Energy = -854.101039471

Enthalpy 0K = -853.854538

Enthalpy 298K = -853.833075

Free Energy 298K = -853.902123

Lowest Frequency = 72.9526 cm<sup>-1</sup>Second Frequency = 74.7472 cm<sup>-1</sup>**f-3F** ( $\kappa^2\kappa^1$ )

SCF (wB97X-D) Energy = -949.979833956

Enthalpy 0K = -949.731548

Enthalpy 298K = -949.705834

Free Energy 298K = -949.789619

Lowest Frequency = 30.7627 cm<sup>-1</sup>Second Frequency = 37.9375 cm<sup>-1</sup>

Ru -0.44573 -0.00994 0.00003

N -2.04821 -1.21305 0.00016

C -3.00631 -1.85754 0.00023

N 0.58537 -1.04263 1.38154

C 1.44366 -1.43296 2.04354

N 0.58529 -1.04287 -1.38124

C 1.44327 -1.43336 -2.04356

C -4.22014 -2.66321 0.00053

H -4.81524 -2.43953 -0.88785

H -3.96563 -3.72550 -0.00078

H -4.81364 -2.44133 0.89044

C 2.64315 -1.80466 2.77518

H 2.59535 -1.44136 3.80378

H 2.77858 -2.88800 2.77957

H 3.47764 -1.32806 2.25165

C 2.64232 -1.80541 -2.77572

H 2.59407 -1.44222 -3.80434

H 3.47725 -1.32898 -2.25276

H 2.77749 -2.88878 -2.78010

O -1.53804 1.46561 -1.09211

C -1.86396 2.02538 -0.00016

O -1.53805 1.46570 1.09184

C -2.58353 3.34321 -0.00020

H -3.19487 3.44202 0.89790

H -1.83636 4.14232 -0.00017

H -3.19482 3.44201 -0.89833

O 1.08979 1.39242 -0.00008

C 2.36198 1.19712 0.00004

O 2.96245 0.11353 0.00013

C 3.15170 2.50347 -0.00008

H 2.88426 3.09583 0.87938

H 4.22408 2.30341 0.00023

H 2.88472 3.09535 -0.88001

**m-3F** ( $\kappa^2\kappa^1$ ) (\* single point)

SCF (wB97X-D) Energy = -949.964521272

Enthalpy 0K = -949.715140

Enthalpy 298K = -949.692687

Free Energy 298K = -949.763990

Lowest Frequency = 68.7412 cm<sup>-1</sup>Second Frequency = 73.5359 cm<sup>-1</sup>**c-2F** ( $2\kappa^2$ )

SCF (wB97X-D) Energy = -817.255814478

Enthalpy 0K = -817.054858

Enthalpy 298K = -817.034030

Free Energy 298K = -817.107876

Lowest Frequency = 12.9419 cm<sup>-1</sup>Second Frequency = 37.5746 cm<sup>-1</sup>

Ru -0.00006 0.08602 -0.00001

N 1.26578 -1.28192 -0.68445

C 2.03674 -2.02977 -1.10903

N -1.26569 -1.28221 0.68422

C -2.03646 -2.03024 1.10885

C 3.00833 -2.96184 -1.66526

H 3.73766 -2.41725 -2.26943

H 3.53253 -3.48347 -0.86125

H 2.50365 -3.69616 -2.29733

C -3.00769 -2.96273 1.66500

H -3.77791 -2.41158 2.20949

H -3.48087 -3.53569 0.86430

H -2.51335 -3.65227 2.35320

O 1.47678 1.61381 -0.26925

C 1.89659 1.41642 0.91228

C 2.95662 2.29955 1.50613

H 3.49242 1.77224 2.29626

H 3.64471 2.63657 0.72944

H 2.47341 3.17986 1.94046

O 1.37617 0.47981 1.59392

O -1.37620 0.48003 -1.59390

C -1.89680 1.41641 -0.91209

O -1.47708 1.61362 0.26950

C -2.95679 2.29962 -1.50588

H -3.64471 2.63685 -0.72914

H -2.47352 3.17979 -1.94044

H -3.49278 1.77227 -2.29586

**t-2F** ( $2\kappa^2$ )

SCF (wB97X-D) Energy = -817.257141315

Enthalpy 0K = -817.056112

Enthalpy 298K = -817.035201

Free Energy 298K = -817.109430

Lowest Frequency = 20.4590 cm<sup>-1</sup>Second Frequency = 20.8161 cm<sup>-1</sup>

Ru 0.00692 0.00114 0.00001

N 2.01052 -0.00095 0.00005

C 3.16383 -0.00371 0.00006

N -1.99668 0.00163 -0.00004

C -3.15013 0.00006 -0.00007

C 4.62003 -0.00848 -0.00004

H 4.99051 -0.52006 0.89110

H 4.99037 -0.52423 -0.88883

H 4.99384 1.01777 -0.00248

C -4.60639 -0.00294 -0.00003

H -4.97922 1.02368 0.00071

H -4.97758 -0.51540 -0.89038

H -4.97753 -0.51666 0.88962

O 0.00727 -1.85615 1.08787

C 0.00203 -2.50655 -0.00000

C -0.04487 -4.00971 -0.00001

H 0.43528 -4.40212 -0.89741

H 0.43459 -4.40213 0.89775

H -1.09045 -4.33240 -0.00044

O 0.00732 -1.85615 -1.08787

O 0.00982 1.85839 1.08788

C 0.00555 2.50877 0.00001

O 0.00987 1.85840 -1.08786

C -0.03903 4.01202 0.00003

H 0.44088 4.40371 -0.89782

H -1.08409 4.33640 0.00061

H 0.44181 4.40369 0.89739

## XYZ Coordinates and Computed Energies

 $\omega$ B97X-D Optimised Geometries and Energies $c\text{-}^4\mathbf{F}$  ( $2\kappa^1$ )

SCF (wB97X-D) Energy = -1082.70066035

Enthalpy 0K = -1082.405114

Enthalpy 298K = -1082.374467

Free Energy 298K = -1082.468708

Lowest Frequency = 28.4081  $\text{cm}^{-1}$ Second Frequency = 34.4688  $\text{cm}^{-1}$ 

N -1.11210 1.69230 0.17399  
 C -1.97001 2.42265 -0.05829  
 N 1.35695 0.74384 1.59191  
 C 2.35498 1.11041 2.03567  
 N 1.11208 -1.69192 0.17450  
 C 1.96966 -2.42277 -0.05742  
 C -3.14693 3.19508 -0.41784  
 H -2.92185 3.87342 -1.24312  
 H -3.90276 2.46800 -0.72983  
 H -3.51255 3.76955 0.43545  
 C 3.69290 1.53358 2.41452  
 H 3.71122 2.60127 2.64224  
 H 4.04841 0.97276 3.28122  
 H 4.33048 1.32647 1.54943  
 C 3.14621 -3.19597 -0.41655  
 H 2.92082 -3.87458 -1.24152  
 H 3.90247 -2.46948 -0.72887  
 H 3.51148 -3.77024 0.43703  
 O -3.28263 -0.17140 -0.62434  
 C -2.46434 -0.70660 -1.38722  
 O -1.18966 -0.79133 -1.24551  
 C -2.95167 -1.36091 -2.67866  
 H -2.51492 -0.84179 -3.53662  
 H -2.61059 -2.39877 -2.72331  
 H -4.04026 -1.32360 -2.74116  
 O 1.18970 0.79131 -1.24574  
 C 2.46435 0.70620 -1.38759  
 O 3.28263 0.17120 -0.62456  
 C 2.95163 1.35947 -2.67957  
 H 2.60889 2.39669 -2.72611  
 H 4.04032 1.32371 -2.74121  
 H 2.51641 0.83828 -3.53706  
 Ru 0.00009 0.00018 0.28210  
 N -1.35674 -0.74318 1.59219  
 C -2.35476 -1.10965 2.03607  
 C -3.69266 -1.53273 2.41508  
 H -4.04826 -0.97148 3.28147  
 H -4.33021 -1.32611 1.54985  
 H -3.71092 -2.60030 2.64336

 $t\text{-}^4\mathbf{F}$  ( $2\kappa^1$ ) (\* single point)

SCF (wB97X-D) Energy = -1082.68973779

Enthalpy 0K = -1082.392272

Enthalpy 298K = -1082.365533

Free Energy 298K = -1082.445936

Lowest Frequency = 70.0770  $\text{cm}^{-1}$  $^1\mathbf{A}$ 

SCF (wB97X-D) Energy = -916.698126403

Enthalpy 0K = -916.442327

Enthalpy 298K = -916.423144

Free Energy 298K = -916.486949

Lowest Frequency = 79.3554  $\text{cm}^{-1}$ Second Frequency = 84.9786  $\text{cm}^{-1}$ 

Ru 0.25672 0.02914 -0.09363  
 O 1.40150 0.84278 1.53467  
 C 1.85571 1.76416 0.75653  
 C 2.73288 2.87000 1.28088  
 C -1.02505 -1.83843 0.15046  
 C -0.59810 -1.34082 1.43752

C -1.57065 -0.69617 2.28559  
 C -2.87753 -0.53777 1.86833  
 O 1.49793 1.72569 -0.48223  
 H 2.10027 3.72426 1.57869  
 H 3.29198 2.52909 2.16470  
 H 3.42336 3.21313 0.49593  
 C -3.30747 -1.05730 0.60518  
 C -2.41273 -1.70885 -0.22035  
 H -2.74949 -2.15628 -1.16126  
 H -3.60327 -0.03885 2.51954  
 H -0.43094 -2.59871 -0.36734  
 H -1.25685 -0.34525 3.27404  
 C -1.54777 1.12182 -1.42143  
 O -1.36766 1.41656 -0.18261  
 O -0.81060 0.18084 -1.91843  
 C -2.53269 1.87078 -2.27903  
 H -2.83352 1.26043 -3.14286  
 H -3.41277 2.15384 -1.68239  
 H -2.06018 2.79636 -2.65149  
 H 0.31420 -1.73008 1.90354  
 H -4.35960 -0.96469 0.31441  
 N 1.71181 -1.18393 -0.45689  
 C 2.61542 -1.90135 -0.70401  
 C 3.73741 -2.75110 -1.08696  
 H 4.32325 -2.27701 -1.89410  
 H 4.40964 -2.92799 -0.22959  
 H 3.37953 -3.72966 -1.45106

 $^1\mathbf{A}^*$  (\* single point)

SCF (wB97X-D) Energy = -688.071761864

Enthalpy 0K = -687.867219

Enthalpy 298K = -687.852816

Free Energy 298K = -687.906545

Lowest Frequency = 86.6244  $\text{cm}^{-1}$ Second Frequency = 96.6078  $\text{cm}^{-1}$  $^1\mathbf{B}^*$  (t-O,t-N) (\* single point)

SCF (wB97X-D) Energy = -1167.28011091

Enthalpy 0K = -1166.904208

Enthalpy 298K = -1166.880090

Free Energy 298K = -1166.954284

Lowest Frequency = 66.2851  $\text{cm}^{-1}$ Second Frequency = 79.8151  $\text{cm}^{-1}$ TS( $^1\mathbf{B}^*\text{-}^1\mathbf{C}^*$ ) (t-O,t-N) (\* single point)

SCF (wB97X-D) Energy = -1167.24614610

Enthalpy 0K = -1166.872940

Enthalpy 298K = -1166.847121

Free Energy 298K = -1166.928501

Lowest Frequency = -1108.4338  $\text{cm}^{-1}$ Second Frequency = 37.3798  $\text{cm}^{-1}$  $^1\mathbf{C}^*$  (t-O,t-N)

SCF (wB97X-D) Energy = -1167.26180468

Enthalpy 0K = -1166.883460

Enthalpy 298K = -1166.856719

Free Energy 298K = -1166.942673

Lowest Frequency = 9.5538  $\text{cm}^{-1}$ Second Frequency = 32.1144  $\text{cm}^{-1}$ 

Ru -0.27367 0.16408 -0.17987  
 O -1.28062 2.09886 -0.39274  
 C -0.90712 3.06699 -1.06048  
 C -1.80600 4.21604 -1.37940  
 C -0.91892 0.52858 1.94611  
 C -2.34345 0.59571 2.10684  
 C -3.08059 -0.54734 2.20968  
 C -2.44605 -1.82461 2.17396  
 O 0.30688 3.18556 -1.55598  
 H -1.79829 4.40037 -2.45621

## XYZ Coordinates and Computed Energies

 $\omega$ B97X-D Optimised Geometries and Energies

```

H -2.81660  4.00861 -1.03384
H -1.42139  5.11687 -0.89348
C  2.61846 -0.04947 -0.00656
C  3.95795  0.28948  0.19366
C  1.56925  0.86405  0.27400
C  4.29102  1.54187  0.69786
H  4.75345 -0.41543 -0.02801
C  1.94353  2.10381  0.81550
C  3.28216  2.44402  1.01931
H  5.33146  1.80488  0.85327
H  1.17898  2.82621  1.09757
H  3.53570  3.41418  1.43540
H  0.89931  2.50508 -1.17744
C -1.09248 -1.92164  2.03578
C -0.28964 -0.73814  1.90674
H  0.77340 -0.81461  2.11038
H -3.04570 -2.72026  2.30336
H -0.33224  1.41157  2.17539
H -4.15413 -0.49082  2.35998
C  2.18435 -1.38158 -0.45336
C  2.48176 -3.66708 -1.15383
H  3.13225 -4.49454 -1.41588
C  3.02377 -2.44412 -0.79157
H  4.09804 -2.31052 -0.76842
C  0.31103 -2.73591 -0.83916
H -0.77071 -2.79120 -0.83045
C  1.09752 -3.82249 -1.17368
H  0.63463 -4.76371 -1.44361
N  0.83435 -1.54599 -0.49671
H -2.81591  1.56894  2.17726
H -0.59950 -2.88754  2.07324
N -2.17000 -0.63008 -0.90281
C -3.19526 -0.97057 -1.30890
C -4.49929 -1.39911 -1.79442
H -5.05239 -0.53824 -2.17596
H -4.37900 -2.13144 -2.59551
H -5.06225 -1.85143 -0.97489

```

**<sup>1</sup>B<sup>+</sup>** (t-O,t-C6H6)

```

SCF (wB97X-D) Energy = -1167.28294922
Enthalpy 0K = -1166.904320
Enthalpy 298K = -1166.877854
Free Energy 298K = -1166.961280
Lowest Frequency = 29.9475 cm-1
Second Frequency = 42.3707 cm-1

```

```

Ru  0.36062  0.05357 -0.12568
O   1.85679 -1.42010 -0.41869
C   2.05392 -1.02108 -1.60687
C   3.08859 -1.65108 -2.48187
C   1.60544  1.46957  1.33289
C   2.43486  0.71456  2.21060
C   3.66714  0.28124  1.79773
C   4.14487  0.61220  0.50723
O   1.35217 -0.03534 -2.01580
H   4.04746 -1.16057 -2.28714
H   3.19499 -2.70967 -2.24220
H   2.83751 -1.51196 -3.53367
C  -2.30781 -0.62027 -0.64907
C  -3.11707 -1.39802  0.18124
C  -1.31141 -1.23577 -1.43275
C  -2.90207 -2.76863  0.26784
H  -3.88704 -0.92241  0.78105
C  -1.09378 -2.61697 -1.31428
C  -1.87341 -3.37723 -0.45506
H  -3.53361 -3.37055  0.91388
H  -0.32364 -3.08711 -1.91564
H  -1.70317 -4.44416 -0.36417
H  -0.82533 -0.68284 -2.23202
C   3.37129  1.34867 -0.35208

```

```

C   2.07245  1.76816  0.04087
H   1.56378  2.48322 -0.59514
H   5.13982  0.29663  0.21050
H   0.75123  1.99513  1.74774
H   4.29583 -0.29276  2.46971
C  -2.39399  0.85871 -0.62088
C  -3.53288  2.96198 -0.71927
H  -4.43414  3.54654 -0.86726
C  -3.56972  1.57504 -0.80188
H  -4.48976  1.04459 -1.01957
C  -1.18845  2.80269 -0.26934
H  -0.23210  3.25844 -0.04308
C  -2.32014  3.58454 -0.44725
H  -2.24253  4.66242 -0.37145
N  -1.21380  1.46476 -0.35580
H   2.08732  0.50626  3.21666
H   3.73757  1.62759 -1.33349
N  -0.39778 -0.46338  1.67452
C  -0.81103 -0.88411  2.66587
C  -1.32751 -1.43965  3.90846
H  -0.64173 -2.20303  4.28277
H  -1.43220 -0.65187  4.65751
H  -2.30395 -1.89426  3.72734

```

TS (**<sup>1</sup>B<sup>+</sup>-<sup>1</sup>C<sup>+</sup>**) (t-O,t-C6H6) (\* single point)

```

SCF (wB97X-D) Energy = -1167.24848144
Enthalpy 0K = -1166.875601
Enthalpy 298K = -1166.849492
Free Energy 298K = -1166.932450
Lowest Frequency = -1288.2245 cm-1
Second Frequency = 25.0436 cm-1

```

**<sup>1</sup>C<sup>+</sup>** (t-O,t-C6H6)

```

SCF (wB97X-D) Energy = -1167.28867385
Enthalpy 0K = -1166.910046
Enthalpy 298K = -1166.883275
Free Energy 298K = -1166.968966
Lowest Frequency = 17.2162 cm-1
Second Frequency = 28.0733 cm-1

```

```

Ru -0.27010 -0.35462  0.37884
O  -2.32644  0.28186  0.57107
C  -2.80798  1.40717  0.69575
C  -4.24155  1.63342  1.04616
C  -1.80453 -3.01187  0.30641
C  -3.07169 -2.67127 -0.12345
C  -3.24544 -1.88569 -1.27764
C  -2.14905 -1.43128 -1.98030
O  -2.11559  2.51584  0.51904
H  -4.72490  0.68237  1.25996
H  -4.31253  2.30074  1.90811
H  -4.74204  2.12799  0.20920
C   1.85792  0.78727 -1.22330
C   2.49078  1.58015 -2.18514
C   0.45663  0.83457 -1.04556
C   1.74266  2.42336 -2.99588
H   3.56777  1.53722 -2.31769
C  -0.27972  1.65974 -1.90523
C   0.35655  2.45045 -2.86217
H   2.23360  3.03924 -3.74102
H  -1.36589  1.66802 -1.86254
H  -0.23710  3.08384 -3.51436
H  -1.21670  2.29493  0.21459
C  -0.84159 -1.74962 -1.54784
C  -0.66875 -2.55900 -0.40921
H   0.29995 -3.00306 -0.20695
H  -2.27750 -0.84461 -2.88391
H  -1.67307 -3.66605  1.16218
H  -4.24720 -1.65168 -1.62217

```

## XYZ Coordinates and Computed Energies

```

C 2.55354 -0.18818 -0.38098
C 4.44997 -1.38585 0.49457
H 5.51869 -1.56862 0.52378
C 3.93137 -0.41581 -0.34704
H 4.58954 0.16841 -0.97843
C 2.23066 -1.84986 1.22869
H 1.51099 -2.38537 1.84017
C 3.58447 -2.12041 1.30365
H 3.94766 -2.88579 1.97843
N 1.72234 -0.91733 0.40606
H -3.94057 -3.03355 0.41606
H 0.00074 -1.52925 -2.19401
N 0.24233 0.99302 1.76764
C 0.60502 1.74062 2.57074
C 1.05524 2.68349 3.58445
H 0.40930 3.56439 3.58294
H 1.01925 2.21343 4.56984
H 2.08106 2.99104 3.36999

```

**<sup>1</sup>B<sup>+</sup>** (t-O,t-O)

```

SCF (wB97X-D) Energy = -1167.28834726
Enthalpy 0K = -1166.910118
Enthalpy 298K = -1166.883509
Free Energy 298K = -1166.968966
Lowest Frequency = 19.7563 cm-1
Second Frequency = 21.0677 cm-1

```

```

Ru -0.47417 0.28228 0.20451
O -2.11865 1.14723 -0.69978
C -2.92645 0.61958 0.14629
C -4.39863 0.84104 0.03701
C -0.86602 -1.30358 -1.82058
C -0.31373 -2.05911 -0.77941
C -1.14078 -2.91178 -0.01469
C -2.48373 -3.01010 -0.30441
O -2.41113 -0.10816 1.04145
H -4.86944 0.73367 1.01429
H -4.60668 1.82270 -0.39010
H -4.81164 0.08101 -0.63287
C 2.51127 -0.62423 0.35090
C 3.46609 -1.63079 0.19043
C 1.55220 -0.76864 1.36446
C 3.46167 -2.74481 1.02593
H 4.19168 -1.57095 -0.61421
C 1.54363 -1.88278 2.19706
C 2.50238 -2.87705 2.02721
H 4.20514 -3.52156 0.88284
H 0.78919 -1.96535 2.97197
H 2.50353 -3.74994 2.67071
H 0.87737 0.06324 1.64495
C -3.03100 -2.27229 -1.37044
C -2.23878 -1.42680 -2.11915
H -2.65915 -0.86267 -2.94389
H -3.11985 -3.66937 0.27598
H -0.22330 -0.73953 -2.48828
H -0.70135 -3.50079 0.78307
C 2.41901 0.49822 -0.60859
C 3.35786 2.05184 -2.18621
H 4.21503 2.47743 -2.69631
C 3.52992 1.03496 -1.25829
H 4.52006 0.66450 -1.02045
C 1.01126 1.95907 -1.75774
H -0.01294 2.28416 -1.90942
C 2.07300 2.51915 -2.44713
H 1.89146 3.30799 -3.16697
N 1.17727 0.97246 -0.86019
H 0.76119 -2.13795 -0.67745
H -4.08359 -2.38332 -1.61190
N -0.41900 1.94066 1.31575
C -0.45106 2.90719 1.94369

```

## ωB97X-D Optimised Geometries and Energies

```

C -0.50014 4.12291 2.74266
H -1.01940 4.90649 2.18656
H -1.03540 3.92757 3.67450
H 0.51417 4.45606 2.97246

```

**<sup>1</sup>B<sup>+</sup>** (t-C6H6,t-O)

```

SCF (wB97X-D) Energy = -1167.29430147
Enthalpy 0K = -1166.915623
Enthalpy 298K = -1166.889045
Free Energy 298K = -1166.973509
Lowest Frequency = 26.6697 cm-1
Second Frequency = 29.0078 cm-1

```

```

Ru 0.29919 0.16080 0.20162
O 1.32611 1.83434 0.86918
C 1.79689 2.05276 -0.30256
C 2.74396 3.17635 -0.55839
C 2.30217 -0.97145 1.26656
C 1.87723 -1.77295 0.19653
C 2.64018 -1.79691 -0.99462
C 3.77459 -1.02656 -1.11010
O 1.43132 1.25108 -1.21370
H 2.62416 3.54451 -1.57781
H 2.59332 3.97713 0.16623
H 3.76403 2.79671 -0.44741
C -1.96006 -0.80501 -0.97986
C -2.69133 -1.85063 -0.39293
C -0.87323 -1.09922 -1.82341
C -2.32830 -3.16630 -0.62328
H -3.53719 -1.61492 0.24567
C -0.54025 -2.44008 -2.06945
C -1.24666 -3.46386 -1.46177
H -2.89435 -3.97121 -0.16617
H 0.26001 -2.66682 -2.76484
H -0.98306 -4.49771 -1.65752
H -0.38614 -0.31073 -2.38893
C 4.19802 -0.22371 -0.03345
C 3.48008 -0.20095 1.14185
H 3.81461 0.39585 1.98277
H 4.35810 -1.05219 -2.02404
H 1.83329 -1.05798 2.23972
H 2.33990 -2.44703 -1.80816
C -2.33609 0.61102 -0.73491
C -3.77724 2.51661 -0.71398
H -4.73405 2.98352 -0.92054
C -3.57738 1.16955 -1.00179
H -4.35817 0.55927 -1.44102
C -1.52428 2.63099 0.09182
H -0.68395 3.14226 0.54626
C -2.73624 3.25673 -0.16312
H -2.85664 4.30659 0.07517
N -1.33909 1.33537 -0.19240
H 1.08495 -2.50290 0.33746
H 5.11069 0.35690 -0.12438
N -0.64184 -0.55837 1.84064
C -1.17226 -0.93956 2.79220
C -1.83385 -1.41318 4.00003
H -2.11617 -0.56219 4.62381
H -2.72983 -1.97904 3.73592
H -1.15641 -2.05926 4.56273

```

TS (**<sup>1</sup>B<sup>+</sup>-<sup>1</sup>C<sup>+</sup>**)<sub>1</sub> (t-C6H6,t-O) (\*single point)

```

SCF (wB97xD) Energy = -1167.25015778
Enthalpy 0K = -1166.874375
Enthalpy 298K = -1166.850545
Free Energy 298K = -1166.924671
Lowest Frequency = -64.8529 cm-1
Second Frequency = 68.7960 cm-1

```

INT (**<sup>1</sup>B<sup>+</sup>-<sup>1</sup>C<sup>+</sup>**) (t-C6H6,t-O)

## XYZ Coordinates and Computed Energies

 $\omega$ B97X-D Optimised Geometries and Energies

SCF ( $\omega$ B97X-D) Energy = -1167.25368197  
 Enthalpy 0K = -1166.876255  
 Enthalpy 298K = -1166.849444  
 Free Energy 298K = -1166.934637  
 Lowest Frequency = 25.9508  $\text{cm}^{-1}$   
 Second Frequency = 33.3073  $\text{cm}^{-1}$

C 1.66550 -1.28555 -1.62893  
 N 0.56917 -0.94798 -0.92815  
 C -0.56151 -1.68927 -1.04835  
 C -0.59813 -2.77587 -1.91968  
 C 0.52419 -3.11024 -2.66019  
 C 1.68095 -2.35236 -2.50812  
 Ru 0.60366 0.55600 0.42164  
 C -1.69824 3.02233 0.60311  
 C -0.53940 2.75026 -0.14768  
 C -0.63027 1.99526 -1.33165  
 C -1.88632 1.52145 -1.75146  
 C -3.01801 1.79892 -1.00825  
 C -2.92363 2.54871 0.17254  
 H 0.21722 1.91774 -2.00417  
 C -1.68952 -1.29859 -0.19003  
 C -3.01430 -1.62007 -0.47856  
 C -4.02740 -1.22612 0.39094  
 C -3.73232 -0.49833 1.54127  
 C -2.41330 -0.15862 1.82747  
 C -1.39751 -0.54832 0.95988  
 H -3.82038 2.76898 0.74183  
 O 2.00528 -0.35757 1.54268  
 C 1.83340 -1.55096 2.06840  
 O 0.81090 -2.21192 1.94290  
 C 3.03435 -2.03602 2.84566  
 H 3.87682 -2.18098 2.16392  
 H 3.33327 -1.28671 3.58209  
 H 2.79905 -2.97682 3.34107  
 H -3.26805 -2.16336 -1.38296  
 H -5.05552 -1.49150 0.16842  
 H -2.16809 0.38008 2.73638  
 H -4.52732 -0.20916 2.22014  
 H -1.49882 -3.37379 -1.98387  
 H -0.36794 -0.70175 1.41905  
 H -1.62715 3.63209 1.49753  
 H -3.98580 1.44096 -1.34130  
 H 0.37879 3.27850 0.09534  
 H -1.96405 0.96167 -2.67764  
 H 2.58953 -2.58703 -3.04889  
 H 0.50415 -3.96110 -3.33192  
 H 2.54295 -0.67691 -1.45778  
 N 2.22503 1.53969 -0.31385  
 C 3.18727 2.09770 -0.61870  
 C 4.40992 2.79393 -0.99024  
 H 4.53956 2.76627 -2.07431  
 H 4.35482 3.83397 -0.66109  
 H 5.26269 2.30964 -0.50923

TS ( ${}^1\text{B}^+ \text{--} {}^1\text{C}^+$ ) 2 (t-C<sub>6</sub>H<sub>6</sub>, t-O)

SCF ( $\omega$ B97X-D) Energy = -1167.24954764  
 Enthalpy 0K = -1166.876530  
 Enthalpy 298K = -1166.851082  
 Free Energy 298K = -1166.932487  
 Lowest Frequency = -862.7425  $\text{cm}^{-1}$   
 Second Frequency = -38.8324  $\text{cm}^{-1}$

C 1.66595 -1.28584 -1.62841  
 N 0.56944 -0.94810 -0.92799  
 C -0.56123 -1.68937 -1.04836  
 C -0.59770 -2.77606 -1.91959  
 C 0.52480 -3.11057 -2.65978  
 C 1.68158 -2.35276 -2.50746  
 Ru 0.60354 0.55612 0.42152

C -1.69806 3.02222 0.60323  
 C -0.53940 2.75028 -0.14788  
 C -0.63053 1.99536 -1.33189  
 C -1.88665 1.52154 -1.75143  
 C -3.01819 1.79894 -1.00792  
 C -2.92355 2.54861 0.17291  
 H 0.21683 1.91783 -2.00456  
 C -1.68940 -1.29866 -0.19026  
 C -3.01412 -1.62018 -0.47906  
 C -4.02740 -1.22645 0.39033  
 C -3.73255 -0.49878 1.54081  
 C -2.41361 -0.15899 1.82725  
 C -1.39764 -0.54847 0.95978  
 H -3.82016 2.76877 0.74246  
 O 2.00507 -0.35703 1.54299  
 C 1.83332 -1.55040 2.06879  
 O 0.81098 -2.21160 1.94310  
 C 3.03418 -2.03516 2.84639  
 H 3.87712 -2.17921 2.16505  
 H 3.33221 -1.28606 3.58340  
 H 2.79917 -2.97634 3.34119  
 H -3.26768 -2.16338 -1.38356  
 H -5.05545 -1.49187 0.16761  
 H -2.16860 0.37963 2.73626  
 H -4.52768 -0.20979 2.21961  
 H -1.49839 -3.37395 -1.98395  
 H -0.36809 -0.70170 1.41897  
 H -1.62677 3.63189 1.49770  
 H -3.98604 1.44100 -1.34080  
 H 0.37883 3.27855 0.09497  
 H -1.96460 0.96184 -2.67764  
 H 2.59029 -2.58758 -3.04793  
 H 0.50487 -3.96149 -3.33142  
 H 2.54341 -0.67727 -1.45704  
 N 2.22482 1.53970 -0.31411  
 C 3.18706 2.09759 -0.61913  
 C 4.40980 2.79363 -0.99074  
 H 4.55999 2.73172 -2.07075  
 H 4.33892 3.84331 -0.69719  
 H 5.25788 2.33366 -0.47855

${}^1\text{C}^+$  (t-C<sub>6</sub>H<sub>6</sub>, t-O) (\* single point)

SCF ( $\omega$ B97X-D) Energy = -1167.26492497  
 Enthalpy 0K = -1166.889491  
 Enthalpy 298K = -1166.865012  
 Free Energy 298K = -1166.940315  
 Lowest Frequency = 61.0054  $\text{cm}^{-1}$   
 Second Frequency = 63.9821  $\text{cm}^{-1}$

${}^1\text{B}^+$  (t-N, t-O) (\* single point)

SCF ( $\omega$ B97X-D) Energy = -1167.28504978  
 Enthalpy 0K = -1166.908484  
 Enthalpy 298K = -1166.884299  
 Free Energy 298K = -1166.958688  
 Lowest Frequency = 65.9415  $\text{cm}^{-1}$   
 Second Frequency = 70.6084  $\text{cm}^{-1}$

TS ( ${}^1\text{B}^+ \text{--} {}^1\text{C}^+$ ) (t-N, t-O)

SCF ( $\omega$ B97X-D) Energy = -1167.25832691  
 Enthalpy 0K = -1166.881173  
 Enthalpy 298K = -1166.855108  
 Free Energy 298K = -1166.939042  
 Lowest Frequency = -64.3622  $\text{cm}^{-1}$   
 Second Frequency = 20.3265  $\text{cm}^{-1}$

C -1.96052 -1.83057 0.51189  
 N -1.32578 -0.65386 0.57388  
 C -1.98448 0.44345 1.00336  
 C -3.32365 0.38894 1.36397  
 C -3.98719 -0.83207 1.29790



## XYZ Coordinates and Computed Energies

 $\omega$ B97X-D Optimised Geometries and Energies

C -3.29463 -1.95910 0.86965  
 Ru 0.63713 -0.25934 0.03579  
 C 0.47668 -0.51007 -2.31914  
 C -0.39637 -1.57745 -2.66611  
 C -1.74760 -1.36312 -2.76360  
 C -2.27987 -0.06741 -2.56408  
 C -1.45004 0.97794 -2.24842  
 C -0.05299 0.77167 -2.07614  
 H -2.40991 -2.17818 -3.03720  
 C -1.16182 1.67918 0.98701  
 C -1.62160 2.83127 0.33767  
 C -0.79447 3.93638 0.20458  
 C 0.50622 3.91391 0.71727  
 C 0.94881 2.80440 1.41995  
 C 0.11877 1.68270 1.57658  
 H 0.60005 1.63736 -2.01115  
 O 1.13166 -2.28306 -0.01801  
 C 1.42405 -2.27763 1.22531  
 O 1.27993 -1.17094 1.83335  
 C 1.93211 -3.49993 1.91360  
 H 1.62849 -3.49315 2.96097  
 H 1.57035 -4.39657 1.40956  
 H 3.02552 -3.49895 1.87354  
 H -2.62140 2.84302 -0.08439  
 H -1.15820 4.82116 -0.30748  
 H 1.92731 2.80415 1.88840  
 H 1.14929 4.77949 0.60031  
 H -3.82520 1.28733 1.70522  
 H 0.39804 0.91054 2.28552  
 H 1.54148 -0.65000 -2.46495  
 H -1.84552 1.98246 -2.16245  
 H 0.02666 -2.55519 -2.86680  
 H -3.34253 0.10330 -2.70203  
 H -3.77655 -2.92730 0.80733  
 H -5.03128 -0.90273 1.58270  
 H -1.37094 -2.66513 0.15033  
 N 2.59276 0.25146 -0.34925  
 C 3.70216 0.51121 -0.52727  
 C 5.10360 0.84079 -0.74623  
 H 5.62971 0.86202 0.21065  
 H 5.56271 0.08883 -1.39161  
 H 5.18375 1.82011 -1.22288

 ${}^1\text{C}^+$  (t-N,t-O)

SCF (wB97X-D) Energy = -1167.29579274  
 Enthalpy 0K = -1166.917291  
 Enthalpy 298K = -1166.890667  
 Free Energy 298K = -1166.975646  
 Lowest Frequency = 27.5072  $\text{cm}^{-1}$   
 Second Frequency = 29.1104  $\text{cm}^{-1}$

C -2.17482 0.06538 -1.83743  
 N -1.39923 -0.21749 -0.78081  
 C -1.81784 -1.12237 0.13740  
 C -3.06455 -1.73526 0.00587  
 C -3.87010 -1.42822 -1.07926  
 C -3.41584 -0.51553 -2.02808  
 Ru 0.49452 0.57171 -0.46044  
 C -1.39437 3.09903 -0.65999  
 C -2.58435 2.74962 -0.06544  
 C -2.59309 2.09175 1.18485  
 C -1.41212 1.80087 1.82430  
 C -0.16765 2.12639 1.22062  
 C -0.16162 2.77944 -0.03003  
 H -3.53984 1.84453 1.65331  
 C -0.84781 -1.36707 1.21111  
 C -1.06499 -2.25359 2.26822  
 C -0.09328 -2.43126 3.24596  
 C 1.09962 -1.71803 3.16773  
 C 1.32302 -0.82638 2.11706

C 0.36085 -0.63330 1.11590  
 H 0.74583 3.25838 -0.38884  
 O 1.19796 -0.87249 -1.81785  
 C 1.72290 -1.98609 -1.70105  
 O 1.94204 -2.56896 -0.55008  
 C 2.15264 -2.78080 -2.89002  
 H 1.53768 -3.68260 -2.95534  
 H 2.04101 -2.19022 -3.79705  
 H 3.18905 -3.10158 -2.76456  
 H -1.99270 -2.81321 2.33894  
 H -0.26531 -3.12269 4.06321  
 H 2.25482 -0.26920 2.08329  
 H 1.86154 -1.85233 3.92937  
 H -3.39715 -2.45178 0.74682  
 H 1.59644 -2.02099 0.18751  
 H -1.38633 3.64979 -1.59515  
 H 0.73001 2.08674 1.82764  
 H -3.52507 3.00181 -0.54396  
 H -1.41559 1.33308 2.80281  
 H -4.00781 -0.25599 -2.89718  
 H -4.84023 -1.90070 -1.18960  
 H -1.77522 0.78887 -2.53931  
 N 2.42320 1.20477 -0.15071  
 C 3.51424 1.55937 -0.01313  
 C 4.89191 1.99838 0.16233  
 H 5.50125 1.16801 0.52614  
 H 5.29335 2.34612 -0.79214  
 H 4.93102 2.81543 0.88608

 ${}^4\text{G}^+$  ( $\kappa^1$ )

SCF (wB97X-D) Energy = -1333.32250716  
 Enthalpy 0K = -1332.903488  
 Enthalpy 298K = -1332.868300  
 Free Energy 298K = -1332.975486  
 Lowest Frequency = 17.5718  $\text{cm}^{-1}$   
 Second Frequency = 19.3905  $\text{cm}^{-1}$

N 1.91551 -2.02703 0.19800  
 C 2.67339 -2.89351 0.16462  
 N 1.17531 -0.01471 2.15432  
 C 1.49793 0.24315 3.22982  
 C 1.91491 0.57797 4.58439  
 H 1.82391 -0.29807 5.22990  
 H 2.95507 0.91076 4.57529  
 H 1.28556 1.37927 4.97740  
 C 3.64702 -3.97571 0.11567  
 H 3.40892 -4.65281 -0.70730  
 H 4.64510 -3.56032 -0.03943  
 H 3.63287 -4.53371 1.05417  
 O 1.83419 1.72773 -2.14115  
 C 2.67632 1.37221 -1.32029  
 C 4.13129 1.79384 -1.45317  
 H 4.77054 0.90978 -1.52827  
 H 4.26421 2.42198 -2.33375  
 H 4.44408 2.34098 -0.55953  
 O 2.45901 0.64591 -0.26013  
 N 0.39396 -0.67707 -1.78632  
 C 0.45084 -0.62947 -2.93429  
 C 0.57621 -0.41995 -4.36625  
 H -0.40919 -0.32223 -4.82647  
 H 1.13759 0.51011 -4.49443  
 H 1.11385 -1.24735 -4.83271  
 N -0.39525 1.49672 0.26945  
 C 0.39797 2.54461 0.57280  
 C -1.71867 1.73516 0.13041  
 C -0.06453 3.83684 0.74511  
 H 1.44918 2.31114 0.67632  
 C -2.24939 3.01638 0.29631  
 C -1.42241 4.08447 0.60373  
 H 0.63927 4.62666 0.97870

## XYZ Coordinates and Computed Energies

H -3.31625 3.15385 0.16420  
H -1.82845 5.08302 0.72469  
C -2.67728 0.64548 -0.19791  
C -3.66258 0.30186 0.73172  
C -2.67908 0.03795 -1.45262  
C -4.61515 -0.66373 0.42129  
H -3.67952 0.79381 1.70003  
C -3.62631 -0.93320 -1.76086  
H -1.94330 0.34201 -2.18627  
C -4.59344 -1.28939 -0.82400  
H -5.38326 -0.91761 1.14541  
H -3.62429 -1.39730 -2.74193  
H -5.34374 -2.03362 -1.07214  
Ru 0.70517 -0.38144 0.20476  
N -0.85734 -1.58445 0.75854  
C -1.66440 -2.35220 1.05508  
C -2.68960 -3.31757 1.42435  
H -3.20958 -3.65455 0.52554  
H -2.23515 -4.17317 1.92834  
H -3.41408 -2.84371 2.08956

**<sup>3</sup>G** (2κ<sup>1</sup>)

SCF (wB97X-D) Energy = -1429.19314937  
Enthalpy 0K = -1428.770819  
Enthalpy 298K = -1428.735115  
Free Energy 298K = -1428.839768  
Lowest Frequency = 21.1322 cm<sup>-1</sup>  
Second Frequency = 35.7936 cm<sup>-1</sup>

N 0.99452 -0.58120 1.38714  
C 1.94711 -1.01204 1.87059  
N -1.05951 -2.27557 0.61370  
C -1.05814 -3.42498 0.66086  
C 3.16139 -1.65302 2.34489  
H 3.49186 -2.32381 1.54676  
H 3.93320 -0.90743 2.54200  
H 2.96200 -2.22986 3.25052  
C -0.89864 -4.86894 0.62022  
H -0.93312 -5.29366 1.62536  
H -1.68053 -5.32287 0.00816  
H 0.08032 -5.05827 0.17020  
O -3.95991 0.65750 -0.27993  
C -3.43325 -0.09535 -1.11453  
O -2.19554 -0.42463 -1.18972  
C -4.28666 -0.71673 -2.21497  
H -3.81159 -0.56396 -3.18703  
H -4.35165 -1.79716 -2.05322  
H -5.28993 -0.28855 -2.21213  
O 0.45837 -1.08285 -1.43139  
C 1.23806 -2.10586 -1.46444  
O 1.59135 -2.82626 -0.52158  
C 1.76420 -2.39231 -2.87051  
H 2.38114 -1.55510 -3.21491  
H 2.36098 -3.30559 -2.87868  
H 0.92944 -2.48068 -3.57051  
N -0.23419 1.73025 -0.33115  
C 0.93662 2.40271 -0.40220  
C -1.37113 2.43268 -0.52457  
C 0.97725 3.77590 -0.65733  
C -1.39398 3.79274 -0.79192  
H -2.30039 1.87801 -0.43078  
C -0.19498 4.48645 -0.85917  
H 1.94495 4.26169 -0.70971  
H -2.34926 4.28316 -0.93881  
H -0.16936 5.55154 -1.06635  
C 2.24126 1.71292 -0.21315  
C 2.68723 0.76064 -1.12816  
C 3.07207 2.09565 0.84288  
C 3.93464 0.16764 -0.96510  
H 2.03230 0.46342 -1.93723

## ωB97X-D Optimised Geometries and Energies

C 4.32494 1.51026 0.99888  
H 2.72823 2.84619 1.54907  
C 4.75634 0.54094 0.09541  
H 4.26410 -0.58847 -1.67072  
H 4.96444 1.81341 1.82277  
H 5.73319 0.08170 0.21520  
Ru -0.62443 -0.34829 0.20773  
N -1.82028 0.35126 1.66907  
C -2.69108 0.75544 2.30655  
C -3.90211 1.25995 2.93201  
H -4.25946 0.56777 3.69713  
H -3.72780 2.23852 3.38393  
H -4.64279 1.34332 2.13096

**<sup>1</sup>G** (2κ<sup>2</sup>) (\* single point)

SCF (wB97xD) Energy = -1163.74040586  
Enthalpy 0K = -1163.414453  
Enthalpy 298K = -1163.390903  
Free Energy 298K = -1163.464438  
Lowest Frequency = 59.8125 cm<sup>-1</sup>  
Second Frequency = 65.3033 cm<sup>-1</sup>

**<sup>2</sup>G<sup>+</sup>** (κ<sup>2</sup>)

SCF (wB97X-D) Energy = -1067.85310277  
Enthalpy 0K = -1067.530473  
Enthalpy 298K = -1067.504877  
Free Energy 298K = -1067.589833  
Lowest Frequency = 15.7779 cm<sup>-1</sup>  
Second Frequency = 17.0123 cm<sup>-1</sup>

Ru 0.70426 -0.24419 0.09260  
N -0.37559 -1.64400 -0.91070  
C -0.96607 -2.46180 -1.46620  
C -1.71180 -3.50068 -2.16096  
H -2.77147 -3.42241 -1.90914  
H -1.58711 -3.38693 -3.23984  
H -1.34168 -4.48224 -1.85719  
O 2.12950 -1.78092 0.58362  
C 2.75452 -1.51238 -0.48247  
O 2.27329 -0.57891 -1.21765  
C 4.01403 -2.21716 -0.87178  
H 4.86973 -1.62810 -0.52854  
H 4.05630 -3.19847 -0.39932  
H 4.07746 -2.30555 -1.95705  
N -0.42022 1.29759 -0.73066  
C -1.70143 1.47181 -0.33301  
C 0.11709 2.13220 -1.63423  
C -2.46522 2.52368 -0.83596  
C -0.59516 3.18703 -2.17985  
H 1.14257 1.91867 -1.91603  
C -1.90898 3.38899 -1.76726  
H -3.47930 2.66812 -0.48241  
H -0.12431 3.83435 -2.90968  
H -2.49174 4.21312 -2.16391  
C -2.21396 0.47551 0.63000  
C -1.31147 -0.19667 1.46922  
C -3.55696 0.09777 0.65551  
C -1.73487 -1.21744 2.31390  
H -0.28695 0.21297 1.66423  
C -3.98430 -0.91746 1.50738  
H -4.26981 0.57013 -0.01276  
C -3.07858 -1.57941 2.33312  
H -1.01445 -1.71734 2.95209  
H -5.03184 -1.19968 1.51794  
H -3.41939 -2.37108 2.99140  
N 1.88327 1.10811 1.05564  
C 2.60128 1.84060 1.58180  
C 3.51211 2.75620 2.25355  
H 4.02177 2.23435 3.06649  
H 4.25388 3.12583 1.54232

## XYZ Coordinates and Computed Energies

 $\omega$ B97X-D Optimised Geometries and Energies

H 2.95321 3.60053 2.66264

**<sup>3</sup>G<sup>+</sup>** ( $\kappa^2$ ) (\* single point)

SCF ( $\omega$ B97X-D) Energy = -1200.57033475

Enthalpy 0K = -1200.200328

Enthalpy 298K = -1200.173341

Free Energy 298K = -1200.253717

Lowest Frequency = 63.8071  $\text{cm}^{-1}$

Second Frequency = 68.6312  $\text{cm}^{-1}$

**<sup>1</sup>G** ( $\kappa^2\kappa^1$ )

SCF ( $\omega$ B97X-D) Energy = -1163.73549072

Enthalpy 0K = -1163.409611

Enthalpy 298K = -1163.383532

Free Energy 298K = -1163.468031

Lowest Frequency = 21.1779  $\text{cm}^{-1}$

Second Frequency = 29.3721  $\text{cm}^{-1}$

Ru -0.68947 0.35222 -0.02281

N 0.40322 1.85187 -0.80824

C 1.04949 2.71402 -1.22172

C 1.88046 3.80149 -1.71916

H 2.88043 3.72215 -1.28653

H 1.95599 3.75140 -2.80763

H 1.44520 4.76238 -1.43565

O -2.15673 1.78972 0.67178

C -2.79643 1.60329 -0.40117

O -2.27850 0.84965 -1.29149

C -4.14987 2.21168 -0.62299

H -4.90609 1.50381 -0.27108

H -4.24720 3.13563 -0.05176

H -4.31646 2.39333 -1.68572

O -1.99345 -1.10850 0.62785

C -1.69915 -1.90814 1.59820

O -0.63788 -1.90993 2.22908

C -2.80880 -2.88801 1.93991

H -3.15819 -3.39220 1.03547

H -2.45902 -3.61920 2.66884

H -3.65767 -2.33710 2.35511

N 0.38322 -1.12708 -0.96648

C 1.66682 -1.35410 -0.60473

C -0.20629 -1.92393 -1.87001

C 2.39406 -2.39770 -1.17413

C 0.46560 -2.97414 -2.47359

H -1.24077 -1.68545 -2.09030

C 1.79043 -3.21363 -2.11963

H 3.41251 -2.57905 -0.85050

H -0.04720 -3.59315 -3.20011

H 2.34145 -4.03497 -2.56557

C 2.19131 -0.43552 0.42070

C 1.25952 0.18194 1.27245

C 3.53957 -0.08973 0.50922

C 1.68591 1.11137 2.21719

H 0.25439 -0.33018 1.46940

C 3.95728 0.84941 1.44777

H 4.26232 -0.52804 -0.17300

C 3.03276 1.45121 2.30037

H 0.95493 1.56085 2.88061

H 5.00794 1.11497 1.51147

H 3.36544 2.17914 3.03371

**TS (<sup>1</sup>G-<sup>1</sup>H)**

SCF ( $\omega$ B97X-D) Energy = -1163.72779076

Enthalpy 0K = -1163.406255

Enthalpy 298K = -1163.380669

Free Energy 298K = -1163.463653

Lowest Frequency = -1103.1881  $\text{cm}^{-1}$

Second Frequency = 25.9767  $\text{cm}^{-1}$

Ru -0.71945 0.15335 -0.09564

N -0.05616 1.88452 -0.83932

C 0.32870 2.89536 -1.24072

C 0.81747 4.17655 -1.73092

H 1.79833 4.38484 -1.29774

H 0.90409 4.15517 -2.81955

H 0.12601 4.97198 -1.44394

O -2.47214 1.16041 0.67400

C -3.09496 0.89913 -0.39870

O -2.47713 0.32319 -1.34695

C -4.55570 1.22929 -0.53362

H -5.13830 0.36084 -0.21184

H -4.81525 2.07516 0.10421

H -4.80245 1.43985 -1.57527

O -1.61561 -1.63181 0.54133

C -1.20019 -2.11716 1.63361

O -0.25203 -1.61194 2.29525

C -1.88871 -3.34227 2.17626

H -2.49865 -3.81458 1.40656

H -1.14916 -4.04315 2.56738

H -2.53245 -3.03950 3.00715

N 0.69603 -0.96562 -1.08268

C 1.97873 -0.90968 -0.64749

C 0.36577 -1.78148 -2.09494

C 2.96392 -1.69022 -1.25534

C 1.30044 -2.57566 -2.73727

H -0.68264 -1.77124 -2.37294

C 2.62504 -2.52573 -2.30799

H 3.98160 -1.65292 -0.88444

H 0.99178 -3.22012 -3.55176

H 3.38241 -3.14025 -2.78369

C 2.18724 0.00307 0.48411

C 1.01521 0.41393 1.16177

C 3.43977 0.50826 0.83795

C 1.15890 1.32639 2.21523

H 0.14577 -0.55768 1.54298

C 3.54936 1.41976 1.88138

H 4.32998 0.21622 0.28716

C 2.40625 1.82905 2.56914

H 0.27109 1.63362 2.76061

H 4.52304 1.81275 2.15707

H 2.49356 2.53919 3.38653

**<sup>1</sup>H**

SCF ( $\omega$ B97X-D) Energy = -1163.74556828

Enthalpy 0K = -1163.418972

Enthalpy 298K = -1163.392687

Free Energy 298K = -1163.478344

Lowest Frequency = 26.4787  $\text{cm}^{-1}$

Second Frequency = 26.9764  $\text{cm}^{-1}$

Ru 0.63280 0.22340 0.12803

N 0.53398 2.11888 -0.35622

C 0.48901 3.23212 -0.66334

C 0.44015 4.63434 -1.05506

H -0.57306 4.89989 -1.36549

H 0.73297 5.27060 -0.21646

H 1.12253 4.81192 -1.88968

O 2.53891 0.03305 -0.85531

C 3.19441 0.30841 0.20395

O 2.59003 0.57174 1.27610

C 4.70199 0.34551 0.13911

H 5.12868 0.16343 1.12619

H 5.06993 -0.38722 -0.58108

H 5.01768 1.33816 -0.19691

O 0.91430 -1.80644 0.78583

C 0.86957 -2.82652 0.10125

O 0.45104 -2.85664 -1.14206

C 1.30385 -4.15824 0.63106

H 1.55255 -4.07103 1.68703

H 0.51150 -4.89502 0.48188

## XYZ Coordinates and Computed Energies

```

H 2.17973 -4.49507 0.07005
N -1.04252 0.30280 1.33138
C -2.24030 0.03834 0.74718
C -0.97736 0.53056 2.65071
C -3.40339 0.00086 1.52034
C -2.09738 0.51047 3.46551
H 0.01783 0.72660 3.03654
C -3.33378 0.23835 2.88409
H -4.35512 -0.21726 1.04986
H -1.99736 0.70024 4.52765
H -4.23392 0.20982 3.48986
C -2.14872 -0.17888 -0.70080
C -0.82479 -0.11922 -1.21398
C -3.25375 -0.38871 -1.52874
C -0.68985 -0.24942 -2.60910
H 0.15569 -1.95393 -1.39833
C -3.07631 -0.54153 -2.89914
H -4.25962 -0.42890 -1.11746
C -1.79163 -0.46486 -3.43621
H 0.30442 -0.17740 -3.04713
H -3.93271 -0.70970 -3.54434
H -1.64978 -0.56938 -4.50890

```

**<sup>2</sup>G** ( $\kappa^2\kappa^1$ )

```

SCF (wB97X-D) Energy = -1296.46028843
Enthalpy 0K = -1296.087441
Enthalpy 298K = -1296.056013
Free Energy 298K = -1296.154312
Lowest Frequency = 17.8377 cm-1
Second Frequency = 22.1201 cm-1

```

```

N -1.94625 0.85923 0.99687
C -2.89640 1.32517 1.44862
C -4.13475 1.88502 1.96724
H -4.46481 1.31405 2.83768
H -3.98782 2.92700 2.25912
H -4.89932 1.83194 1.18864
O -3.13519 0.37296 -1.69212
C -2.71121 -0.78131 -1.66414
O -1.65633 -1.21569 -1.04900
C -3.44429 -1.89952 -2.39904
H -2.75990 -2.41729 -3.07698
H -3.80350 -2.63667 -1.67539
H -4.28732 -1.49522 -2.96045
O -0.58626 -1.65954 1.45929
C -0.28923 -1.49273 2.70297
O 0.18454 -0.46287 3.19642
C -0.56466 -2.71348 3.56654
H -1.61103 -3.01209 3.46249
H 0.04715 -3.55132 3.22039
H -0.33743 -2.50022 4.61129
N 1.22693 -1.14499 -0.65064
C 2.46449 -0.62409 -0.49890
C 1.07035 -2.36800 -1.17554
C 3.59143 -1.34597 -0.88966
C 2.15181 -3.12874 -1.59160
H 0.03977 -2.69835 -1.25139
C 3.43371 -2.60835 -1.44397
H 4.57860 -0.92707 -0.73258
H 1.98618 -4.11348 -2.01237
H 4.30236 -3.18454 -1.74564
C 2.51625 0.72377 0.10158
C 1.45647 1.13701 0.92937
C 3.53394 1.62819 -0.20508
C 1.44646 2.42636 1.45594
H 0.79242 0.40437 1.50284
C 3.51069 2.91806 0.31621
H 4.33295 1.33821 -0.88110
C 2.46649 3.31991 1.14623
H 0.63721 2.70996 2.12015

```

 $\omega$ B97X-D Optimised Geometries and Energies

```

H 4.30713 3.61238 0.06767
H 2.45369 4.32517 1.55564
Ru -0.38695 -0.09386 0.11411
N -0.36703 1.29885 -1.35763
C -0.58199 2.01378 -2.23443
C -0.99176 2.85797 -3.34521
H -0.92290 3.91243 -3.07030
H -0.36443 2.67304 -4.21962
H -2.02974 2.60858 -3.58087

```

**TS** (**<sup>2</sup>G-<sup>2</sup>H)**

```

SCF (wB97X-D) Energy = -1296.45136620
Enthalpy 0K = -1296.082425
Enthalpy 298K = -1296.051913
Free Energy 298K = -1296.145370
Lowest Frequency = -1131.2062 cm-1
Second Frequency = 23.1575 cm-1

```

```

N 1.79581 -1.07128 1.12076
C 2.82618 -1.51621 1.37795
C 4.19471 -1.96668 1.56787
H 4.57029 -1.65106 2.54325
H 4.26183 -3.05348 1.48864
H 4.78456 -1.49790 0.77448
O 3.49643 0.09647 -1.05099
C 2.96992 1.19734 -0.84475
O 1.79594 1.42948 -0.36949
C 3.73934 2.47809 -1.16407
H 3.16874 3.08987 -1.86901
H 3.86333 3.06823 -0.25161
H 4.71717 2.24414 -1.58713
O 0.19183 1.24943 1.95152
C -0.60133 0.86920 2.85772
O -1.31648 -0.16871 2.75813
C -0.70813 1.69715 4.11206
H 0.00681 2.51903 4.09363
H -1.72460 2.09066 4.19520
H -0.53129 1.06175 4.98298
N -1.15785 1.20053 -0.60573
C -2.37038 0.62726 -0.79506
C -0.96481 2.49600 -0.89113
C -3.43366 1.38677 -1.28735
C -1.98176 3.29370 -1.38931
H 0.04490 2.85177 -0.71109
C -3.23819 2.72614 -1.58749
H -4.40834 0.92972 -1.41169
H -1.79031 4.33737 -1.60914
H -4.06043 3.32547 -1.96518
C -2.43519 -0.79787 -0.43553
C -1.37503 -1.29319 0.36367
C -3.43341 -1.64814 -0.91499
C -1.38365 -2.66084 0.67007
H -1.07200 -0.60458 1.51549
C -3.40789 -3.00137 -0.59958
H -4.21968 -1.26683 -1.56091
C -2.37879 -3.50722 0.19367
H -0.59549 -3.05594 1.30504
H -4.18462 -3.66017 -0.97501
H -2.35838 -4.56447 0.44276
Ru 0.31983 0.03296 0.24088
N 0.71844 -0.94575 -1.47473
C 1.24103 -1.37476 -2.40644
C 2.04734 -1.82983 -3.52690
H 2.08620 -2.92050 -3.55660
H 1.64215 -1.45756 -4.46995
H 3.05217 -1.42660 -3.37096

```

**<sup>2</sup>H**

```

SCF (wB97X-D) Energy = -1296.46629370
Enthalpy 0K = -1296.092260

```

## XYZ Coordinates and Computed Energies

 $\omega$ B97X-D Optimised Geometries and Energies

Enthalpy 298K = -1296.061235  
Free Energy 298K = -1296.156190  
Lowest Frequency = 27.8128  $\text{cm}^{-1}$   
Second Frequency = 28.2984  $\text{cm}^{-1}$

|    |          |          |          |
|----|----------|----------|----------|
| N  | 1.56706  | -1.71712 | -0.07290 |
| C  | 2.56900  | -2.27813 | -0.17822 |
| C  | 3.92714  | -2.77940 | -0.30498 |
| H  | 4.21017  | -3.35899 | 0.57603  |
| H  | 4.03412  | -3.40041 | -1.19656 |
| H  | 4.55843  | -1.88792 | -0.38718 |
| O  | 3.67974  | 0.45485  | -0.43090 |
| C  | 3.15586  | 1.09201  | 0.49896  |
| O  | 1.94161  | 1.02964  | 0.90160  |
| C  | 4.00820  | 2.09109  | 1.28580  |
| H  | 3.61351  | 3.10220  | 1.14274  |
| H  | 3.94836  | 1.87127  | 2.35534  |
| H  | 5.04814  | 2.05930  | 0.95699  |
| O  | -0.13760 | -0.57501 | 2.12151  |
| C  | -0.82443 | -1.48209 | 2.58485  |
| O  | -1.51848 | -2.32158 | 1.85112  |
| C  | -0.93825 | -1.71738 | 4.05985  |
| H  | -0.29848 | -1.01738 | 4.59389  |
| H  | -1.97873 | -1.58838 | 4.36877  |
| H  | -0.65127 | -2.74620 | 4.29004  |
| N  | -1.00762 | 1.47169  | 0.22145  |
| C  | -2.27437 | 1.29221  | -0.23066 |
| C  | -0.64100 | 2.62998  | 0.78729  |
| C  | -3.20593 | 2.32685  | -0.10827 |
| C  | -1.52406 | 3.68777  | 0.93071  |
| H  | 0.39331  | 2.65899  | 1.11924  |
| C  | -2.82971 | 3.52821  | 0.47227  |
| H  | -4.21985 | 2.18596  | -0.46361 |
| H  | -1.19315 | 4.61025  | 1.39319  |
| H  | -3.55040 | 4.33415  | 0.56971  |
| C  | -2.51867 | -0.03251 | -0.82027 |
| C  | -1.41114 | -0.92772 | -0.77075 |
| C  | -3.73115 | -0.38864 | -1.41558 |
| C  | -1.61085 | -2.18567 | -1.37193 |
| H  | -1.43496 | -2.05020 | 0.90566  |
| C  | -3.88932 | -1.64825 | -1.98173 |
| H  | -4.56149 | 0.31232  | -1.45080 |
| C  | -2.82231 | -2.54432 | -1.96094 |
| H  | -0.78822 | -2.89848 | -1.37840 |
| H  | -4.83309 | -1.92553 | -2.44051 |
| H  | -2.93520 | -3.52767 | -2.41059 |
| Ru | 0.27081  | -0.14201 | 0.05336  |
| N  | 0.93425  | 0.42015  | -1.72536 |
| C  | 1.60436  | 0.75981  | -2.59909 |
| C  | 2.61108  | 1.19183  | -3.55483 |
| H  | 2.67308  | 0.49850  | -4.39604 |
| H  | 2.38488  | 2.19225  | -3.92952 |
| H  | 3.56050  | 1.20453  | -3.01025 |
